# Supplementary material for: Trends of blood pressure, raised blood pressure, hypertension and its control among Italian adults: CUORE Project cross-sectional health examination surveys 1998/2008/2018
Source: PubMed Central journal article supplement — BMJ Open. 2022 Nov 14;12(11):e064270. doi: 10.1136/bmjopen-2022-064270 (PMC9664280; doi:10.1136/bmjopen-2022-064270), 2022-11-14
Supplement: bmjopen-2022-064270.draft_revisions.pdf [file bmjopen-2022-064270.draft_revisions.pdf]

# BMJ Open

BMJ Open is committed to open peer review. As part of this commitment we make the peer review history of every article we publish publicly available.

When an article is published we post the peer reviewers' comments and the authors' responses online. We also post the versions of the paper that were used during peer review. These are the versions that the peer review comments apply to.

The versions of the paper that follow are the versions that were submitted during the peer review process. They are not the versions of record or the final published versions. They should not be cited or distributed as the published version of this manuscript.

BMJ Open is an open access journal and the full, final, typeset and author-corrected version of record of the manuscript is available on our site with no access controls, subscription charges or pay-per-view fees (<http://bmjopen.bmj.com>).

If you have any questions on BMJ Open's open peer review process please email [info.bmjopen@bmj.com](mailto:info.bmjopen@bmj.com)

# BMJ Open

## Trends of blood pressure, raised blood pressure, hypertension and its control among Italian adults: CUORE Project health examination surveys 1998/2008/2018

|                               |                                                                                                                                                                                                                                                                                                                                                                                                                                                                                                                                                                                                                                                                                                                                                                                                                                                                                                                                                                                                                                                                                                                                                                                                                                                                                                                                                                                                                                                                                                                      |
|-------------------------------|----------------------------------------------------------------------------------------------------------------------------------------------------------------------------------------------------------------------------------------------------------------------------------------------------------------------------------------------------------------------------------------------------------------------------------------------------------------------------------------------------------------------------------------------------------------------------------------------------------------------------------------------------------------------------------------------------------------------------------------------------------------------------------------------------------------------------------------------------------------------------------------------------------------------------------------------------------------------------------------------------------------------------------------------------------------------------------------------------------------------------------------------------------------------------------------------------------------------------------------------------------------------------------------------------------------------------------------------------------------------------------------------------------------------------------------------------------------------------------------------------------------------|
| Journal:                      | <i>BMJ Open</i>                                                                                                                                                                                                                                                                                                                                                                                                                                                                                                                                                                                                                                                                                                                                                                                                                                                                                                                                                                                                                                                                                                                                                                                                                                                                                                                                                                                                                                                                                                      |
| Manuscript ID                 | bmjopen-2022-064270                                                                                                                                                                                                                                                                                                                                                                                                                                                                                                                                                                                                                                                                                                                                                                                                                                                                                                                                                                                                                                                                                                                                                                                                                                                                                                                                                                                                                                                                                                  |
| Article Type:                 | Original research                                                                                                                                                                                                                                                                                                                                                                                                                                                                                                                                                                                                                                                                                                                                                                                                                                                                                                                                                                                                                                                                                                                                                                                                                                                                                                                                                                                                                                                                                                    |
| Date Submitted by the Author: | 27-Apr-2022                                                                                                                                                                                                                                                                                                                                                                                                                                                                                                                                                                                                                                                                                                                                                                                                                                                                                                                                                                                                                                                                                                                                                                                                                                                                                                                                                                                                                                                                                                          |
| Complete List of Authors:     | <p>Donfrancesco, Chiara; Istituto Superiore di Sanità, Department of Cardiovascular, Endocrine-metabolic Diseases and Aging</p> <p>Di Lonardo, Anna; Istituto Superiore di Sanita, Department of Cardiovascular, Endocrine-metabolic Diseases and Aging</p> <p>Lo Noce, Cinzia; Istituto Superiore di Sanita', Department of Cardiovascular, Endocrine-metabolic Diseases and Aging</p> <p>Buttari, Brigitta; Istituto Superiore di Sanita', Department of Cardiovascular, Endocrine-metabolic Diseases and Aging</p> <p>Profumo, Elisabetta; Istituto Superiore di Sanita', Department of Cardiovascular, Endocrine-metabolic Diseases and Aging</p> <p>Vespasiano, Francesca; Istituto Superiore di Sanita', National Transplant Center</p> <p>Vannucchi, Serena; Istituto Superiore di Sanita', Department of Cardiovascular, Endocrine-metabolic Diseases and Aging</p> <p>Galletti, Ferruccio; Federico II University , Dept. Clinical Medicine and Surgery</p> <p>Onder, Graziano; Istituto Superiore di Sanità, Department of Cardiovascular, Endocrine-metabolic Diseases and Aging</p> <p>Gulizia, Michele ; National Enterprise of National Relevance and High Specialization "Garibaldi-Nesima Hospital", Catania, Italy; Heart Care Foundation, Florence, Italy</p> <p>Galeone, Daniela; Italian Ministry of Health</p> <p>Bellisario, Paolo; Italian Ministry of Health</p> <p>Palmieri, Luigi; Istituto Superiore di Sanita', Department of Cardiovascular, Endocrine-metabolic Diseases and Aging</p> |
| Keywords:                     | Epidemiology < TROPICAL MEDICINE, Hypertension < CARDIOLOGY, PUBLIC HEALTH                                                                                                                                                                                                                                                                                                                                                                                                                                                                                                                                                                                                                                                                                                                                                                                                                                                                                                                                                                                                                                                                                                                                                                                                                                                                                                                                                                                                                                           |
|                               |                                                                                                                                                                                                                                                                                                                                                                                                                                                                                                                                                                                                                                                                                                                                                                                                                                                                                                                                                                                                                                                                                                                                                                                                                                                                                                                                                                                                                                                                                                                      |

SCHOLARONE™  
Manuscripts

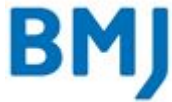

I, the Submitting Author has the right to grant and does grant on behalf of all authors of the Work (as defined in the below author licence), an exclusive licence and/or a non-exclusive licence for contributions from authors who are: i) UK Crown employees; ii) where BMJ has agreed a CC-BY licence shall apply, and/or iii) in accordance with the terms applicable for US Federal Government officers or employees acting as part of their official duties; on a worldwide, perpetual, irrevocable, royalty-free basis to BMJ Publishing Group Ltd ("BMJ") its licensees and where the relevant Journal is co-owned by BMJ to the co-owners of the Journal, to publish the Work in this journal and any other BMJ products and to exploit all rights, as set out in our [licence](#).

The Submitting Author accepts and understands that any supply made under these terms is made by BMJ to the Submitting Author unless you are acting as an employee on behalf of your employer or a postgraduate student of an affiliated institution which is paying any applicable article publishing charge ("APC") for Open Access articles. Where the Submitting Author wishes to make the Work available on an Open Access basis (and intends to pay the relevant APC), the terms of reuse of such Open Access shall be governed by a Creative Commons licence – details of these licences and which [Creative Commons](#) licence will apply to this Work are set out in our licence referred to above.

Other than as permitted in any relevant BMJ Author's Self Archiving Policies, I confirm this Work has not been accepted for publication elsewhere, is not being considered for publication elsewhere and does not duplicate material already published. I confirm all authors consent to publication of this Work and authorise the granting of this licence.

# Trends of blood pressure, raised blood pressure, hypertension and its control among Italian adults: CUORE Project health examination surveys 1998/2008/2018

## Trends of blood pressure in Italian adults

Chiara Donfrancesco<sup>1</sup>, Anna Di Lonardo<sup>1</sup>, Cinzia Lo Noce<sup>1</sup>, Brigitta Buttari<sup>1</sup>, Elisabetta Profumo<sup>1</sup>, Francesca Vespasiano<sup>1</sup>, Serena Vannucchi<sup>1</sup>, Ferruccio Galletti<sup>2</sup>, Graziano Onder<sup>1</sup>, Michele Massimo Gulizia<sup>3,4</sup>, Daniela Galeone<sup>5</sup>, Paolo Bellisario<sup>5</sup> and Luigi Palmieri<sup>1</sup>.

<sup>1</sup>Istituto Superiore di Sanità, Rome, Italy

<sup>2</sup>Federico II University of Naples Medical School, Naples, Italy

<sup>3</sup> National Enterprise of National Relevance and High Specialization “Garibaldi-Nesima Hospital”, Catania, Italy

<sup>4</sup>Heart Care Foundation, Florence, Italy

<sup>5</sup>Italian Ministry of Health, Rome, Italy

### Corresponding author:

Chiara Donfrancesco, MSc, PhD

Department of Cardiovascular, Endocrine-metabolic Diseases and Aging

Istituto Superiore di Sanità

Via Giano della Bella 34 – 00161 Rome, Italy

chiara.donfrancesco@iss.it

**Word count:** 4649



1  
2  
3  
4  
5  
6  
7  
8  
9  
10  
11  
12  
13  
14  
15  
16  
17  
18  
19  
20  
21  
22  
23  
24  
25  
26  
27  
28  
29  
30  
31  
32  
33  
34  
35  
36  
37  
38  
39  
40  
41  
42  
43  
44  
45  
46  
47  
48  
49  
50  
51  
52  
53  
54  
55  
56  
57  
58  
59  
60

## Abstract

**Objectives:** To assess in the Italian adults trends of blood pressure (BP) and prevalence of raised blood pressure (RBP), hypertension and its control in order to evaluate population health and care, and the achievement of a RBP 25% relative reduction as recommended by the WHO at population level.

**Design:** Results comparison of three cross-sectional surveys based on randomly selected age and sex stratified samples of resident persons aged 35-74 years.

**Setting:** Health examination surveys conducted in Italy within the CUORE Project following standardized methodologies.

**Participants:** 2985 men and 2955 women examined in 1998/2002, 2218 men and 2204 women examined in 2008/2012, 1031 men and 1066 women examined in 2018/2019.

**Primary and secondary outcome measures:** Age-standardized mean of BP and prevalence of RBP (systolic BP and/or diastolic BP  $\geq$  140/90 mmHg) and hypertension (presenting or being treated for RBP).

**Results:** In 2018/2019, a significant reduction was observed in systolic BP and diastolic BP in men (136/86, 132/84, 132/78 mmHg) and women (132/82, 126/78, 122/73 mmHg), and in the prevalence of RBP (50%, 40% and 30% in men, 39%, 25%, and 16% in women) and of hypertension (54%, 49% and 44% in men, 45%, 35% and 32% in women). Trends were consistent by age and education attainment. In 2018/2019, hypertensive men and women with uncontrolled BP were 73% and 59%, but a significant favorable trend was observed.

**Conclusions:** Data from 2018/2019 underlined that RBP is still commonly observed in the Italian population aged 35-74 years, however, the WHO RBP target at that time may be considered met.

**Word count: 255**

**Keywords:** epidemiology, blood pressure, raised blood pressure, hypertension, health examination survey.

### Strengths and limitations of this study

- Use of blood pressure measurements to estimate mean of blood pressure and the prevalence of raised blood pressure and hypertension.
- Recruitment of randomly selected age and sex specific samples of residents in 10 Italian Regions with coverage of the Northern, Central and Southern Italian territory.
- Adoption of standardized procedures and methods to collect data in the three health examination surveys.
- Assessment of blood pressure indicators by sex, age-classes and educational levels.
- Inadequacy of blood pressure measurement in a single day for the diagnosis of raised blood pressure and hypertension.

For peer review only

## INTRODUCTION

Raised blood pressure (BP) is a condition constituting a leading cause of premature death and disability worldwide, since it significantly increases the risk of heart attack, stroke, kidney failure, dementia and blindness [1]. The main contributors to raised BP are unhealthy eating behaviours – among which sodium excess – physical inactivity, excess of weight, smoking habit, harmful use of alcohol and exposure to persistent stress [2].

The value of blood pressure, in particular of systolic blood pressure (SBP), is included in the risk charts for estimating the probability of incurring or dying from a cardiovascular event, both for the strong etiological significance and for its simplicity and low cost [3-5].

To combat global mortality from non-communicable diseases (NCDs), at the Sixty-sixth World Health Assembly in 2013 Member States developed a Global Plan of Action, for 2013-2020 setting global targets that include achieving a 25% relative reduction in the prevalence of raised BP or contain the prevalence of raised BP, according to national circumstances by 2025, proposed to leading a 33% of relative reduction by 2030, using 2010 as a baseline [6,7]. The World Health Organization (WHO) is supporting countries to meet this global target and to reduce hypertension as part of WHO's Thirteenth General Programme of Work (2019–2023), which focuses on measurable impacts on people's health at country level.

Integrated NCDs programmes implemented through a primary health care approach are an affordable and sustainable way for countries to tackle hypertension. In Italy, the prevention of NCDs is supported by the "Gaining Health: making healthy choices easy" Programme and the National Preventive Plans (NPPs), which were implemented in a context in which NCDs were estimated to account for 91% of all deaths in the period 2000-2016 [8], with a decreasing trend of premature death since 2000 to 2016 for both men and women aged between 30 and 70 years. "Gaining Health" aims to intervene on the four main modifiable risk factors of NCDs (tobacco consumption, sedentary lifestyle/low physical activity, risky and harmful alcohol consumption, poor diet), through policies and actions adopting an intersectoral vision that have also been incorporated over the years by the NPPs.

WHO recommended improving country-level surveillance and monitoring as a top priority in the fight against NCDs, also providing data disaggregated by age, gender, and socioeconomic groups [9, 10]. Monitoring should provide internationally comparable assessments of the trends in NCDs and related risk factors over time, help to benchmark the situation in individual countries versus others in the same region or development category, provide a foundation for advocacy, policy development and coordinated action [9]. Age-standardized prevalence of raised BP among adults and mean systolic BP are among the 25 indicators suggested by the WHO in order to monitor global and national progress in the prevention and control of NCDs. [10]

This study aimed to assess temporal trends for mean values of BP and heart rate measurements, and for prevalence of raised BP, hypertension, awareness and control of hypertension in the Italian population aged 35–74 years, according to sex, age class, educational level, and Region using data measured within the CUORE Project national health examination surveys (HESs) 1998–2002, 2008–2012, and 2018–2019.

## METHODS

### Study design

Three HESs were conducted in Italy within the CUORE Project. The first survey was conducted from May 1998 to December 2002 in all Italian Regions, enrolling a random sample of 100 men and 100 women aged 35–74 years for every 1.5 million inhabitants (participation rate 50%). The second survey was conducted from March 2008 to July 2012, investigating a sample of 110 men and 110 women aged 35–79 years for every 1.5 million residents in all Italian Regions (participation rate 53%). The third survey was conducted from April 2018 to December 2019, in 10 Regions (out of 20) chosen in the North, Central, and South Italy, using a sample of 100 men and 100 women aged 35–74 years in each examined Region (participation rate 40%).

The three HESs were conducted by the Italian National Institute of Health (Istituto Superiore di Sanità-ISS); the first and second surveys in collaboration with the national scientific association of hospital cardiologists (ANMCO—Associazione Nazionale Medici Cardiologi Ospedalieri) and its foundation (Fondazione per il Tuo cuore - Heart Care Foundation). Surveys details were published elsewhere [11–14]. The three HESs were approved by the Ethical Committee of the ISS; all participants received an informative note and signed an informed consent. The three HESs are recognized within the Italian National Statistical Program. The second and third surveys were also recognized within the European HES collaboration [15, 16].

### Study procedures and methods

The CUORE Project HESs used international standardized procedures and methods for the data collection and measurements [11–14].

BP measurements were performed applying the appropriate cuff to the right arm, while the participant was in a sitting position after 5 minutes at rest. During the 1998–2002 and 2008–2012 HES, SBP and DBP were identified at the beginning of the first and fifth phase of the Korotkoff sounds using a mercury sphygmomanometer; during the 2018–2019 HES an oscillometric device (Omron HEM-907) was used. Two consecutive readings were recorded in the first survey and three consecutive readings were recorded in the second and third survey, one minute apart. Heart rate was measured at the wrist between the first and the second measurements; it was measured at the right wrist by placing the middle fingers of the left hand on it to locate the radial artery - when a pulse was found, the number of beats felt within a one-minute period was counted using a stop watch as a time references. Information on pharmacological treatment were recorded by a standardized questionnaire and by checking the boxes of the drugs being used.

### Patient and Public Involvement

It was not appropriate or possible to involve patients or the public in the design, or conduct, or reporting, or dissemination plans of our research.

## Statistical analysis

The statistical comparison of the 1998–2002, 2008–2012, and 2018–2019 CUORE Project HESs data included 35- to 74-year-old residents in 10 Regions, distributed in north, central, and south Italy, involved in all the surveys: Piedmont, Lombardy, Liguria, Emilia Romagna, Tuscany, Lazio, Abruzzo, Basilicata, Calabria, and Sicily.

The average of the first and second BP measurement was used for the statistical analysis. As suggested by the WHO, raised blood pressure was defined as SBP  $\geq$ 140 mmHg and/or DBP  $\geq$ 90 mmHg [6, 10]. Hypertensives were defined as those with SBP $\geq$ 140 mmHg and/or DBP $\geq$ 90 mmHg or under specific pharmacological treatment and were divided into groups of “undiagnosed”, “diagnosed but untreated”, “uncontrolled” (treated and SBP $\geq$  140 mmHg and/or DBP $\geq$  90 mmHg) and “controlled” (treated and SBP<140 mmHg and DBP<90 mmHg). The European Society of Cardiology (ESC) and the European Society of Hypertension (ESH) also consider these cut off values of RBP and hypertension [17].

Educational level was selected as a proxy of socio-economic level; social class was dichotomized as those with primary/middle school attainment ( $\leq$ 8 years, lower education) and high school/university degree (>8 years, higher education).

Mean, standard deviation (SD), and 95% confidence interval of SBP, DBP, SBP and DBP in those not under treatment for hypertension and heart rate, and prevalence of raised blood pressure, hypertension and awareness and control of hypertension were assessed by sex, age group (35–44, 45–54, 55–64, and 65–74 years), and periods and, for those with available information, by educational level.

Following the suggestion reported in the WHO Global NCDs Action Plan 2013–2020 [6, 10], indicators, where appropriate, were age standardized using the direct method, referring to the age- and sex-specific distributions of the Italian adult population in 2000, 2010, and 2019 (Italian National Institute of Statistics-ISTAT), for the 1998–2002, 2008–2012, and 2018–2019 HESs respectively [18]. Data were also age standardized using the European Standard Population (EuStPop) 2013 for international comparisons [19].

Indicators assessed in the most recent period, 2018–2019, were compared with those of previous periods, 1998–2002 and 2008–2012, through statistical tests and regression models. Associations of the indicators with age and educational level were also determined within those periods. Regarding continuous indicators, a t-test was used to assess differences between periods and analysis of variance was used to assess association with age and educational level. Regarding categorical indicators, the chi-square test was used to assess differences between periods and association with age and educational classes. Comparisons between periods were also conducted, adjusting by age and educational level, using linear (continuous indicators) and logistic (categorical indicators) regression models, considering indicators as dependent variables, and period (2018–2019/1998–2002 or 2018–2019/2008–2012), age (35–54/55–74 years) and educational level (high/low) as independent variables; the statistical significance of the period was reported. Two-sided p-values <0.05 were considered statistically significant. Statistical analyses were performed using SAS software, release 9.4.

## RESULTS

After the exclusions of persons with missing data for SBP or DBP or use of specific drug treatments (8 persons in 1998, 18 in 2008 and 9 in 2018), 2985 men and 2955 women (mean age  $\pm$  SD: men 55  $\pm$  11, women 54  $\pm$  11), 2218 men and 2204 women (mean age  $\pm$  SD: men 55  $\pm$  11, women 55  $\pm$  11),

1  
2  
3 and 1031 men and 1066 women (mean age  $\pm$  SD: men  $55 \pm 11$ , women  $55 \pm 11$ ) were included in  
4 the analysis of the 1998–2002, 2008–2012, and 2018–2019 HESs, respectively (S1 Table).  
5  
6  
7

## 8 **Blood pressure and heart rate measurements**

9  
10 The evaluation of the temporal trend of the mean BP shows in the period 2018-2019 as compared  
11 to twenty years before a significant reduction in SBP and DBP in both men (132/78 mmHg in 2018-  
12 2019 with a 3% of reduction for SBP, 10% for DBP) and women (122/73 mmHg, with a reduction of  
13 7% and 11% respectively), while in the period 2018-2019 compared to ten years earlier, a reduction  
14 in mean SBP is observed only in women (3%), being stable in men, and in mean DBP both in men  
15 and women (7%) (Table 1). Similar trends are also observed for those not under antihypertensive  
16 drugs, and by age groups and education level (Tables 1, S2, S3, S4 and S5, Figures 1 and 2).  
17

18 Within the 1998, 2008, and 2018 periods, mean SBP and DBP was higher in men than in women,  
19 regardless of antihypertensive drug treatment use, class of age and educational level, although not  
20 always statistically significant, especially in the 1998-2002 period considering that the difference  
21 increased progressively over time, passing from 3% in 1998-2002 to 4% in 2008-2012 until it reached  
22 8% in 2018-2019 (Tables 1, S2, S3, S4, and S5, Figures 1 and 2). Within those periods, in both men  
23 and women, mean SBP and DBP, regardless of antihypertensive drug treatment use, progressively  
24 increased by age group and was tendentially higher in those with a lower level of education, except  
25 DBP in men (Tables S2, S3, S4, and S5). The mean SBP difference between educational levels  
26 increased progressively in the 1998, 2008, and 2018 periods in both men and women (men: 2%, 3%,  
27 and 4%; women: 7%, 8%, and 12%) (Table S4 and S5, Figures 1 and 2).  
28

29 The mean heart rate was progressively increasing in the three surveys periods, both in men and  
30 women, in all age groups and education levels, remaining between 66 and 74 beats per minute.  
31 Within the 1998, 2008, and 2018 periods, no significant differences are observed in the mean heart  
32 rate by age group, with the exception of women in 1998-2002 for whom it decreases starting from  
33 55 years; there are no differences between levels of education with the exception of men in 2018-  
34 2019 for whom there is an average level of heart rate higher in the lowest level of education.  
35  
36  
37  
38  
39  
40  
41  
42  
43  
44  
45  
46  
47  
48  
49  
50  
51  
52  
53  
54  
55  
56  
57  
58  
59  
60

Table 1. Age-standardized blood pressure and heart rate measurements and prevalence of blood pressure treatment, raised blood pressure, hypertension and state of hypertension control by sex and period. Men and women residing in Italy aged 35-74 years, The CUORE Project Surveys 1998-2002, 2008-2012 and 2018-2019.

|                                       | MEN       |    |         |           |    |         |           |    |         |                        |                   |                   |                        |                   |                   |
|---------------------------------------|-----------|----|---------|-----------|----|---------|-----------|----|---------|------------------------|-------------------|-------------------|------------------------|-------------------|-------------------|
|                                       | 1998-2002 |    |         | 2008-2012 |    |         | 2018-2019 |    |         | 2018-2019 vs 1998-2002 |                   |                   | 2018-2019 vs 2008-2012 |                   |                   |
|                                       | n=2985    |    |         | n=2218    |    |         | n=1031    |    |         |                        |                   |                   |                        |                   |                   |
|                                       | mean      | SD | 95% CI  | mean      | SD | 95% CI  | mean      | SD | 95% CI  | Diff                   | t-test sign^      | Regression sign^^ | Diff                   | t-test sign^      | Regression sign^^ |
| Systolic blood pressure - SBP (mmHg)  | 136       | 18 | 135 136 | 132       | 16 | 131 132 | 132       | 14 | 131 132 | -4                     | ***               | ***               | -0,3                   | ns                | ns                |
| Diastolic blood pressure - DBP (mmHg) | 86        | 11 | 86 87   | 84        | 10 | 83 84   | 78        | 10 | 77 78   | -9                     | ***               | ***               | -6                     | ***               | ***               |
| SBP not under drug treatment (mmHg)   | 134       | 17 | 133 134 | 130       | 15 | 129 131 | 131       | 14 | 130 132 | -3                     | ***               | **                | 1                      | ns                | ns                |
| DBP not under drug treatment (mmHg)   | 85        | 10 | 85 86   | 83        | 10 | 83 84   | 77        | 10 | 76 78   | -9                     | ***               | ***               | -6                     | ***               | ***               |
| Heart rate (beats per minute)         | 66        | 11 | 66 66   | 68        | 10 | 68 69   | 72        | 12 | 71 72   | 6                      | ***               | ***               | 3                      | ***               | ***               |
|                                       | %         |    | 95% CI  | %         |    | 95% CI  | %         |    | 95% CI  | Diff                   | chi-squared sign^ | Logistic sign^^   | Diff                   | chi-squared sign^ | Logistic sign^^   |
| Blood pressure drug treatment         | 19        | 17 | 20      | 24        | 22 | 26      | 25        | 23 | 28      | 7                      | ***               | ***               | 1                      | ns                | ns                |
| Raised blood pressure                 | 50        | 48 | 52      | 40        | 38 | 42      | 30        | 27 | 32      | -20                    | ***               | ***               | -10                    | ***               | ***               |
| Hypertension                          | 54        | 52 | 55      | 49        | 47 | 52      | 44        | 41 | 47      | -9                     | ***               | ***               | -5                     | **                | **                |
| Hypertension                          |           |    |         |           |    |         |           |    |         |                        |                   |                   |                        |                   |                   |
| Undiagnosed                           | 53        | 51 | 56      | 40        | 37 | 42      | 36        | 32 | 41      | -17                    | ***               | ***               | -3                     | ns                | ns                |
| Diagnosed but untreated               | 15        | 14 | 17      | 19        | 16 | 21      | 14        | 11 | 18      | -1                     | ns                | ns                | -4                     | *                 | ns                |
| Uncontrolled                          | 25        | 23 | 27      | 25        | 22 | 27      | 22        | 19 | 26      | -2                     | ns                | **                | -2                     | ns                | *                 |
| Controlled                            | 6         | 5  | 8       | 17        | 15 | 19      | 27        | 23 | 31      | 20                     | ***               | ***               | 10                     | ***               | ***               |



| WOMEN                                 |           |        |         |           |        |         |           |        |         |                        |                               |                               |                        |                               |                               |
|---------------------------------------|-----------|--------|---------|-----------|--------|---------|-----------|--------|---------|------------------------|-------------------------------|-------------------------------|------------------------|-------------------------------|-------------------------------|
|                                       | 1998-2002 |        |         | 2008-2012 |        |         | 2018-2019 |        |         | 2018-2019 vs 1998-2002 |                               |                               | 2018-2019 vs 2008-2012 |                               |                               |
|                                       | n=2955    |        |         | n=2204    |        |         | n=1066    |        |         |                        |                               |                               |                        |                               |                               |
|                                       | mean      | SD     | 95% CI  | mean      | SD     | 95% CI  | mean      | SD     | 95% CI  | Diff                   | t-test sign <sup>^</sup>      | Regression sign <sup>^^</sup> | Diff                   | t-test sign <sup>^</sup>      | Regression sign <sup>^^</sup> |
| Systolic blood pressure - SBP (mmHg)  | 132       | 18     | 131 132 | 126       | 16     | 125 127 | 122       | 16     | 121 123 | -10                    | ***                           | ***                           | -4                     | ***                           | ***                           |
| Diastolic blood pressure - DBP (mmHg) | 82        | 10     | 82 82   | 78        | 9      | 78 79   | 73        | 11     | 72 74   | -9                     | ***                           | ***                           | -6                     | ***                           | ***                           |
| SBP not under drug treatment (mmHg)   | 129       | 16     | 128 129 | 124       | 15     | 123 124 | 120       | 15     | 119 121 | -9                     | ***                           | ***                           | -4                     | ***                           | ***                           |
| DBP not under drug treatment (mmHg)   | 81        | 10     | 80 81   | 78        | 9      | 77 78   | 72        | 10     | 71 73   | -9                     | ***                           | ***                           | -6                     | ***                           | ***                           |
| Heart rate (beats per minute)         | 70        | 11     | 69 70   | 71        | 9      | 71 71   | 73        | 10     | 72 73   | 3                      | ***                           | ***                           | 2                      | ***                           | ***                           |
|                                       | %         | 95% CI |         | %         | 95% CI |         | %         | 95% CI |         | Diff                   | chi-squared sign <sup>^</sup> | Logistic sign <sup>^^</sup>   | Diff                   | chi-squared sign <sup>^</sup> | Logistic sign <sup>^^</sup>   |
| Blood pressure drug treatment         | 22        | 20     | 23      | 22        | 20     | 24      | 23        | 20     | 25      | 1                      | ns                            | **                            | 1                      | ns                            | ns                            |
| Raised blood pressure                 | 39        | 38     | 41      | 25        | 24     | 27      | 16        | 14     | 19      | -23                    | ***                           | ***                           | -9                     | ***                           | ***                           |
| Hypertension                          | 45        | 43     | 46      | 35        | 33     | 37      | 32        | 29     | 34      | -13                    | ***                           | ***                           | -4                     | *                             | ns                            |
| Hypertension                          |           |        |         |           |        |         |           |        |         |                        |                               |                               |                        |                               |                               |
| Undiagnosed                           | 44        | 42     | 47      | 32        | 28     | 35      | 28        | 23     | 32      | -17                    | ***                           | ***                           | -4                     | ns                            | **                            |
| Diagnosed but untreated               | 16        | 14     | 18      | 16        | 13     | 18      | 15        | 12     | 19      | -0,4                   | ns                            | **                            | -0,4                   | ns                            | ns                            |
| Uncontrolled                          | 30        | 27     | 32      | 26        | 23     | 29      | 16        | 13     | 20      | -13                    | ***                           | ***                           | -10                    | **                            | **                            |
| Controlled                            | 10        | 9      | 12      | 27        | 24     | 30      | 41        | 36     | 46      | 31                     | ***                           | ***                           | 14                     | ***                           | ***                           |

SD: standard deviation; CI: confidence interval; Diff: mean or percentage difference between 2018–2019 and 1998–2002 or 2018–2019 and 2008–2012; the values are approximated taking into account the first decimal of means or prevalence. Means, standard deviations, and prevalence were age-standardized by Italian National Institute of Statistics-ISTAT Italian population 2000, 2010, and 2019, respectively. <sup>^</sup> t-test to compare mean values between periods; chi-square test to compare prevalence between periods. <sup>^^</sup> Linear regression and logistic models were assessed considering indicators as dependent variable and period (2018–2019/1998–2002 or 2018–2019/2008–2012), age (35–54/55–74 years), and educational level (high/low) as independent variables; the statistical significance of the period was reported. \*\*\* p < 0.0001; \*\* p < 0.01; \*p < 0.05; ns not significant p-value. Raised blood pressure: systolic blood pressure ≥140 mmHg or diastolic blood pressure ≥90 mmHg. Hypertension: systolic blood pressure ≥140 mmHg or diastolic blood pressure ≥90 mmHg and/or under specific pharmacological treatment. Hypertension is divided into ‘undiagnosed’, ‘diagnosed but untreated’, ‘uncontrolled’ (treated and SBP ≥ 140 mmHg or DBP ≥ 90 mmHg) and ‘controlled’ (treated and SBP < 140 mmHg and DBP < 90 mmHg). Pool of the following Italian regions: Piedmont, Lombardy, Liguria, Emilia Romagna, Tuscany, Lazio, Abruzzo, Basilicata, Calabria, and Sicily.



1  
2  
3  
4  
5  
6  
7  
8  
9  
10  
11  
12  
13  
14  
15  
16  
17  
18  
19  
20  
21  
22  
23  
24  
25  
26  
27  
28  
29  
30  
31  
32  
33  
34  
35  
36  
37  
38  
39  
40  
41  
42  
43  
44  
45  
46

For peer review only

## Hypertension drug treatment, raised blood pressure and hypertension

The prevalence of antihypertensive drug treatment use in men showed a significant increase by 7% in 2018-2019 compared to twenty years earlier, it remained stable for men compared to ten years earlier and for women in the three survey periods (Table 1), however a significant increase was observed in 2018-2019 compared to twenty years earlier in men aged 55 years and over and women aged 65 years and over (Tables S6 and S7). The general increase in the use of antihypertensive drug treatment in men was especially observed among those with higher education level; in women, a generally stable prevalence was observed regardless of education level (Tables S8 and S9). Antihypertensive drug treatment use, was higher in men than in women, in 1998-2002, and reached, in 2018-2019, more similar values between men (25%) and women (23%).

The prevalence of raised BP was 30% in men and 16% in women in 2018-2019, significantly decreased compared to twenty and ten years earlier: in men it decreased by 20% and 10% respectively and in women 23% and 9% respectively (Table 1). The decreasing trend of raised BP was progressively higher by age classes, reaching, in 2018-2019 compared to 1998-2002, the 27% in men and 38% in women aged 65-74 years, while it was similar between educational levels both in men and women (Tables S6, S7, S8, S9, Figures 1 and 2).

The prevalence of hypertension was 44% in men and 32% in women in the 2018-2019, significantly decreased compared to twenty and ten years earlier: in men it decreased by 9% and 5% respectively and in women 13% and 4% respectively (Table 1); in men the decrease was observed among those aged 35 to 54 years both compared to twenty and ten years earlier, in women in all age groups compared to twenty years earlier, while from 55 to 74 years of age compared to the previous ten years; similar decreasing trend was observed between educational levels with a more favourable trend among more educated women (Tables S6, S7, S8 and S9, Figures 1 and 2).

As expected, within periods, both in men and women, prevalence of raised BP and hypertension significantly increased by age group and was tendentially higher in those with a lower level of education (Tables S6, S7, S8, S9, Figures 1 and 2). Prevalence of raised BP and hypertension decreased or remained stable in all Italian Regions both in men and women (Figures 3 and 4, and Table S10).

## Awareness and control of hypertension

In 2018-2019, prevalence of undiagnosed hypertension resulted in 36% and 28% of hypertensive men and women, with a decreasing trend of 17% in comparison with twenty years earlier both in men and women and 3-4 % in comparison with ten years earlier (Table 1); these trends were found in particular in those aged 45 years and over and were similar by educational level, with some advantage in women with higher education (Tables S6, S7, S8 and S9). Within periods, both in men and women, prevalence of undiagnosed hypertension was higher among younger men and women but similar between educational levels (Tables S6, S7, S8 and S9).

Prevalence of not controlled hypertension was found to be halved in women, from 30% of 1998-2002 to 16% in 2018-2019 (Table 1); favorable, but much more contained, trend was found in men with a reduction of 2% (Table 1). Within periods, both in men and women, prevalence of uncontrolled hypertension was found increasing by age classes and tendentially higher in those with lower educational level (Tables S6, S7, S8 and S9).

Although in 2018-2019 only 27% of hypertensive men and 41% of hypertensive women had their blood pressure under control, a positive growth trend of hypertension under control was observed both in men and women, with an increase in 2018-2019, compared to 20 years earlier, of 20% in men and 31% in women (10% and 14 % respectively compared to ten years earlier) (Table 1). An

1  
2  
3 important increase was observed in men from the age of 55 years and in women in all age groups;  
4 similar trend for more or less educated men, while a more favorable trend is observed among more  
5 educated women (Tables S6, S7, S8 and S9, Figures 1 and 2). In 2008-2012 and 2018-2019, in men,  
6 prevalence of controlled hypertension increases by age classes (in women only in the last survey),  
7 and in the latter two surveys it is higher in men with higher education level (Tables S6, S7, S8 and  
8 S9).  
9

10  
11 Results, age standardized according to the European standard population 2013, are available in  
12 Tables S11, S12, S13, S14 and S15.  
13  
14

## 15 16 **DISCUSSION**

17  
18 Data of measured BP in random samples of the general Italian population aged 35–74 years during  
19 three HESs conducted in 1998–2002, 2008–2012, and 2018–2019, showed a significant reduction,  
20 in 2018-2019 compared to twenty years earlier, of SBP and DBP mean levels and prevalence of  
21 raised BP and hypertension. The reductions were consistent with respect to sex, age classes and  
22 education level and were detected to different extents in almost all Italian Regions. This favorable  
23 decline in mean blood pressure and in the prevalence of raised BP and hypertension was observed  
24 in 2018-2019 even when compared with ten years earlier, except for mean SBP in men which was  
25 stable. Although around 7 out of 10 men and 6 out of 10 women with raised BP still in 2018-2019  
26 did not have their blood pressure under control (because it is not diagnosed, diagnosed but not  
27 treated or treated but not under control), an important increase in raised BP control was observed  
28 in 2018-2019 compared to twenty years earlier, for men mostly due to a decrease in the prevalence  
29 of undiagnosed high blood pressure and for women also due to a reduction in the prevalence of  
30 uncontrolled RBP.  
31  
32

33  
34 These results, which to our knowledge are based on the most recent national measured data on  
35 Italian general adult population, responds to the WHO's request to provide information on  
36 effectiveness of national policies and strategies, showing, in relation to the objective indicated in  
37 the Global Action Plan 2013-2020 (25% relative reduction in the prevalence of raised BP or  
38 containment of the prevalence of raised BP by 2025, proposed leading to a 33% of relative reduction  
39 by 2030), a significant decline from 1998-2020 to 2018-2019 in the prevalence of raised BP, from  
40 50% to 30% in men and from 39% to 16% in women, equal to a relative reduction of 41% and 58%  
41 respectively, and also a significant decline from 2008-2012 to 2018-2019, from 40% to 30% in men  
42 and from 25% to 16% in women, equal to a relative reduction of 25% and 36% respectively [6].  
43  
44

45  
46 Mean values of SBP and DBP, as well as prevalence of raised blood pressure trends are consistent  
47 with those of other studies conducted in the Italian adult population. NCD Risk Factor Collaboration,  
48 that pooled data of population-based studies with measured blood pressure in adults aged 18 years  
49 and older from 200 countries, showed that within the 36 Italian surveys (at community, subnational,  
50 and national levels, including the CUORE Project surveys 1998–2002 and 2008–2012), mean values  
51 of SBP and DBP, as well as prevalence of RBP decreased during 1995–2015 period [20, 21].  
52  
53

54  
55 In some other European countries, such as United Kingdom, Switzerland, Spain, Sweden, Norway,  
56 Netherlands, Luxemburg, Ireland, Germany, France, Finland, Belgium and Austria, a decline of blood  
57 pressure levels was also observed with various intensities both in men and women, while in other  
58 countries, mainly from Eastern Europe, such as Slovenia, Slovakia, Serbia, Romania, Poland,  
59 Lithuania, Hungary, Greece, Czech Republic and Portugal, a trend of decline was observed in women  
60 and a stable or slightly increasing trend in men; in other countries, such as Moldova, Croatia, Bosnia

1  
2  
3 and Herzegovina and Albania, a stable or an increasing trend is still ongoing both in men and women  
4 [20, 21].

5 High-income countries have begun to reduce hypertension in their populations through strong  
6 public health policies such as the reduction of salt content in processed food and widely available  
7 early diagnosis and treatment that tackle hypertension and other risk factors together [2, 22]. Also  
8 in Italy, an explanation of the reasons why a decrease in mean blood pressure and in the prevalence  
9 of raised blood pressure is observed in the general adult population might be on the one hand the  
10 enhancement of its early detection, treatment and control and on the other hand successful  
11 national programmes of primary prevention which have led to an increase in the normal weight  
12 prevalence and to the reduction of the daily consumption of salt in the general adult population,  
13 despite the average levels of daily potassium consumption being not yet adequate [11-13]. In the  
14 last past two decades, the "Gaining Health" Programme and NPPs in Italy were oriented to reduce  
15 risk factors associated to the increase of blood pressure, such as physical inactivity, excess of weight  
16 and salt consumption, as well as the smoking habit, through intersectional strategies at both  
17 population (e.g., facilitating the choice of correct lifestyles) and individual levels (e.g., motivational  
18 counselling and specific therapeutic groups), promoting, and supporting national surveillance  
19 systems and monitoring studies, and through voluntary agreements for salt reduction in food  
20 products, school and workplace programs, and public awareness campaigns [23]. As an example,  
21 aimed directly at the diagnosis and control of raised BP, in the NPP 2005-2008 the promotion of a  
22 multifactorial cardiovascular diseases (CVD) risk assessment, based also on BP measurements, and  
23 its monitoring over time in clinical practice has been explicitly included. As well as, NPP 2014-2019  
24 also focused on the early identification and integrated assessment of persons with NCDs risk factors,  
25 to be directed towards an adequate systemic management, able to enhance personal resources for  
26 the conscious adoption of correct life, or when necessary, towards suitable multidisciplinary  
27 therapeutic and assistance paths.

28 Additional findings of the study, including higher level of blood pressure and raised BP/hypertension  
29 in men than in women and more severe values in the southern Italy Regions and tendentially in  
30 people with lower education levels, are consistent with results from other Italian and European  
31 Studies [20,21,24], and are in line with the association of excess of weight and salt consumption  
32 with gender, education level and Italian macro-area [11, 12,14, 25, 26].

33 As far as, the favourable trend of increase in hypertension awareness, treatment, and control is  
34 concerned, it could be due to the greater diffusion and compliance with the guidelines for  
35 hypertension in clinical practice that include simplified recommendations. In Italy, over the period  
36 of our analysis, the antihypertensive treatment was based on the guidelines drawn up by the  
37 ESC/ESH [17, 27-29] which indicated as threshold for immediate treatment BP  $\geq 180/110$  or BP of  
38  $140-179/90-109$  (depending on CVD risk stratification) after lifestyle modifications, with a treatment  
39 target that has changed over time (2003: BP $<140/90$  mmHg; 2007: BP $<140/90$  mmHg and  
40 BP $<130/80$  mmHg in high CVD risk; 2013: BP $<140/90$  mmHg; 2018: DBP $<80$  mmHg for all and SBP  
41  $120-129$  mmHg for persons aged $<65$  years or SBP  $130-139$  mmHg for persons aged $\geq 65$  years). The  
42 progressively lower thresholds for diagnosing hypertension and the beginning of treatment also  
43 may have contributed to this favourable trend based on the threshold of  $140/90$  mm Hg. In addition,  
44 over time, treatment efficacy and control for some patients suffering from smaller side-effects of  
45 the earliest generations of drugs improved thanks to the availability of newer drugs [30].

46 Early detection and treatment of raised BP and other risk factors, as well as public health policies  
47 that reduce exposure to behavioural risk factors, have contributed to the gradual decline in  
48 mortality due to heart disease and stroke in Italy and other high-income countries over the last three  
49 decades [31, 32].  
50  
51  
52  
53  
54  
55  
56  
57  
58  
59  
60

## Strengths and limitations

Major strengths of this study are the following: the use of standardized procedures and methods to assess blood pressure measurements, allowing objective and reliable estimates of SBP, DBP and raised blood pressure; the checking of drug boxes to assess the use of specific pharmacological treatments; a good national coverage with the enrolment of study participants from half of the Italian regions distributed in northern, central, and southern Italy; the random selection and the sex and age classes stratification of samples from the general population.

Conversely, we acknowledge some study limitations, which should be taken in consideration when interpreting results. First, because of the choice of urban districts for the random selection of the study participants within the surveys, the results may not be representative of the habits of the population living in rural areas. The participation rates in the surveys were lower than desirable, yet consistent, with lower contact rates occurring in more highly urbanized areas and with a decreasing trend of participation observed in HESs in other European countries [33]. The cross-sectional design of the study does not allow to assess causality of the associations between SBP, DBP and raised blood pressure and educational level. There were differences in the educational level distribution between the three surveys, which is consistent with the increase of secondary and tertiary education assessed in adults from 2008 to 2017 by the Italian National Institute of Statistics [34]. The use of mercury sphygmomanometer in the 1998-2002 and 2008-2012 surveys and of an oscillometric device in the 2018-2019 survey (due to the EU regulation 847/2012 that banned the sale of mercury sphygmomanometers from 10 April 2014 onwards [35]) may affect comparison among surveys [36]; however, the oscillometric device used in HES 2018-2019 was certified according to international validation protocol to ensure that the device measures accurately in comparison with the mercury sphygmomanometer; in addition it should prevent the observer's error due to the use of a mercury sphygmomanometer, and the common standardized protocol based on aspects such as room temperature, disturbing noises, lighting, adequacy of the table and chair for the measurement, interaction between the survey participant and the measurer, availability of different cuffs may minimize variation due to measurement technique [16, 37, 38]. Anyway, with all device types, mercury and aneroid sphygmomanometers, and oscillometric devices, calibration error may bias the results [39]. Hypertension diagnosis should be based on several BP readings taken on several occasions (at least two), as recommended by international guidelines [17]; however, epidemiological studies are based on BP measurement in a single visit, possibly with two or more measurements repeated during the same visit [16, 40].

## Conclusions

BP assessment in three independent surveys on the Italian population aged 35-74 years, carried out in 10 Regions approximately 10 years apart from each other, showed a significant reduction of BP mean values and prevalence of raised BP and hypertension in 2018-2019 compared to twenty years earlier, with a favourable trend also observed compared to ten years earlier. This reduction was independent of gender, age and educational level and met the 25% target for reduction/containment of the RBP prevalence indicated in the WHO Global Action Plan 2013-2020 by 2025 with baseline 2010. Albeit in 2018-2019 underdiagnoses and non-control of elevated blood pressure was still largely prevalent in Italy, a favourable trend in the control of raised BP has been observed.

Although systematic and periodic monitoring are necessary to observe the trend and control of blood pressure in the coming years, also in relation to the direct and indirect effects of the COVID-19 pandemic, these results have major public health implications in so much as they encourage the

1  
2  
3 initiatives undertaken by the Italian Ministry of Health in order to contain risk factors associated to  
4 the onset of raised BP at individual and population level through the “Gaining Health: making  
5 healthy choices easy” Programme and the NPPs. In continuity with the NPP 2014-2019, the NPP  
6 2020-2025 renewed the commitment to the health promotion and the prevention of NCDs by  
7 providing preventive and protective interventions according to a life-course approach and aiming at  
8 the early identification and management of persons with risk factors.  
9

10  
11 Prevention and control of raised BP involve multi-stakeholder collaboration, such as governments,  
12 academia, the food and beverage industry and civil society. In view of the enormous public health  
13 benefits of BP control, some concerted action has been implemented and data demonstrate that  
14 the prevention of raised BP is today an attainable goal.  
15  
16  
17  
18  
19  
20  
21  
22  
23  
24  
25  
26  
27  
28  
29  
30  
31  
32  
33  
34  
35  
36  
37  
38  
39  
40  
41  
42  
43  
44  
45  
46  
47  
48  
49  
50  
51  
52  
53  
54  
55  
56  
57  
58  
59  
60

For peer review only



## Acknowledgments

Research Group of Osservatorio Epidemiologico Cardiovascolare/Health Examination Survey (OEC/HES) 1998-2002 and 2008-2012 within the CUORE Project for the National Institute of Health (Istituto Superiore di Sanità) ISS: Luigi Palmieri (coordinator), Chiara Donfrancesco (coordinator), Simona Giampaoli (former coordinator), Cinzia Lo Noce, Serena Vannucchi, Anna Di Lonardo, Francesco Dima (former). Research group of the CUORE Project OEC/HES 1998-2002 and 2008-2012 for Associazione Nazionale Medici Cardiologi Ospedalieri/Health Care Foundation (ANMCO/HCF): Michele Massimo Gulizia, Furio Colivicchi and Andrea Di Lenarda (coordinators), Diego Vanuzzo (former coordinator), Domenico Gabrielli, Giuseppe Di Pasquale, Aldo Pietro Maggioni, Gian Francesco Mureddu, Carmine Riccio, Marino Scherillo, Stefano Urbinati, Pompilio Faggiano.

Research Group of the Health Examination Survey (HES) 2018-2019 within the CUORE Project: Chiara Donfrancesco (coordinator), Luigi Palmieri, Cinzia Lo Noce, Anna Di Lonardo, Elisabetta Profumo, Brigitta Buttari, Serena Vannucchi, Simona Giampaoli (former coordinator) (Italian National Institute Health -Istituto Superiore di Sanità, ISS).

Local coordinators of the OEC 1998-2002 participating centers: V. Martinelli (Ospedale Civile S.S. Antonio E Biagio, Alessandria); M. Vona, M.A. (Ospedale Generale Regionale, Aosta); M.L. Biorci (Divisione Di Cardiologia, Ospedale La Colletta, Arenzano); G. Gullace, (Ospedale Umberto I, Bellano); F. Tettamanti, (Azienda Ospedaliera Sant'anna, Como); F. Avanzini, (Servizio Di Cardiologia, Ospedale Di Circolo, Desio); D. Mazzoleni, (Ospedali Riuniti, Mozzo); I. Pastine, M.N. (Asl 4, Rapallo); A. Pizzuti, M.A. ( Ospedale Maggiore S.S. Annunziata, Savigliano); G. Cucchi (Ospedale Civile, Sondrio); M.G. Sclavo, (Centro Traumatologico Ortopedico, Torino); R. Pedretti, (Fondazione S. Maugeri Irccs, Tradate); F. Soffiantino, (Fondazione S. Maugeri Irccs, Veruno); D. Girardini, (Ospedale Civile, Ala); A. Pozzati, (Ospedale Di Bentivoglio); S. Boni, (Ospedale Civile San Biagio, Bovolone); G. Candelpergher, (Stabilimento Ospedaliero Castelfranco Veneto); E. Cremaschi, (Ospedale Civile, Guastalla); C.A. Goldoni, (Ospedale S. Agostino, Modena); F. Cioppi, (Ospedale Degli Infermi, Rimini); L. Roncon, (Presidio Ospedaliero, Rovigo); G. Zanata, (Ospedale Civile, Sacile); P. Spolaore, (Ospedale Civile, Vicenza); L. Quattrini, (Ospedale Geriatrico, Ancona); G. Schillaci, (Policlinico Universitario, Corciano); F. Cecchi, (Presidio Ospedaliero Villa Basilewsky, Firenze); C. Pagnotta, (Presidio Ospedaliero, Foligno); G. Micoli, (Ospedale Civile S. Maria Goretti, Latina); L. Iacopetti, (Ospedale Val Di Nievole, Pescia); M. Uguccione, (Ospedale Cto A. Alesini, Roma); G. Greco, (Ospedale S. Spirito, Roma); L. Robiglio, (Ospedale Tabarracci, Viareggio); G. Chiarandà, (Ospedale Muscatello, Augusta); A.R. Mascolo, (Ospedale Umberto I, Barletta); A. Storelli, (Ospedale A. Di Summa, Brindisi); P. Maxia, (Ospedale San Michele Brotzu, Cagliari); F. Vancheri, (Ospedale S. Elia, Caltanissetta); S. Iacopino (Policlinico, Catanzaro); L. Mantini, (Ospedale Civile Renzetti, Lanciano); G. Di Mauro, (Ospedale Curteri, Mercato S. Severino); M.A. Cauteruccio, Ospedale Civile Minervini, Mormanno); P. Morra, (Azienda Ospedaliera V. Monaldi, Napoli); F. Clemenza, (Ospedale G.F. Ingrassia, Palermo); A. Lopizzo, (Ospedale Regionale San Carlo, Potenza); P. Russo, (Ospedale Santa Maria Delle Grazie, Pozzuoli); G. Neri, (Ospedali Riuniti G. Melacrino E F. Bianchi, Reggio Calabria); C. De Matteis, (Ospedale Ave, Gratia Plena, San Felice A Cangello); S. Pede, (Ospedale N. Melli, S. Pietro Vernotico); P. Furgi, (Fondazione S. Maugeri, Telesse Terme); D. Staniscia, (Ospedale San Timoteo, Termoli).

Local coordinators of the OEC/HES 2008-2012 participating centers: Diego Vanuzzo (Centro di Prevenzione Cardiovascolare ASS 4 "Medio Friuli", Udine); Licia Iacoviello (Centro di ricerca e formazione ad alta tecnologia nelle scienze biomediche Giovanni Paolo II, Università Cattolica, Campobasso); Federico Vancheri (Ospedale S. Elia, Caltanissetta); Carlo Alberto Goldoni (Dipartimento di sanità pubblica, Azienda USL, Modena); Carmelo Antonio Caserta (Associazione calabrese di epatologia, Cittanova - Reggio Calabria); Antonio Lopizzo (Ospedale San Carlo, Potenza);

1  
2  
3 Natalino Meloni (USL 4, Loceri - Nuoro); Marinella Gattone (Fondazione S. Maugeri, Veruno -  
4 Novara); Giuseppe Salamina (SC Centro controllo malattia, ASL TO1, Torino); Alessandro Boccanelli  
5 (Ospedale San Giovanni Addolorata, Roma); Roberto Amici (Ospedale Santa Maria della Pietà,  
6 Camerino -Macerata); Gianfranco Alunni (Ospedale SantaMaria della Misericordia, Azienda  
7 Ospedaliera, Perugia); Giuseppe Favretto (Ospedale riabilitativo di alta specializzazione, Motta di  
8 Livenza - Treviso); Mariapiera Vettori (Azienda ULSS 13 del Veneto, Noale - Venezia); Marino  
9 Scherillo (Azienda Ospedaliera G. Rummo, Benevento); Pompilio Faggiano (Azienda Ospedaliera  
10 Spedali Civili, Brescia); Maria Teresa La Rovere (Fondazione Salvatore Maugeri, Istituto di  
11 riabilitazione, Montescano - Pavia); Maria Luisa Biorci (ASL 3 Genovese- PO "La Colletta", Arenzano  
12 - Genova); Pasquale Caldarola (Cardiologia, Ospedale di Terlizzi, Centro servizi territoriali della città,  
13 Bitonto - Bari); Giovanni Menegoni (Azienda provincial per i servizi sanitari di Trento, Presidio  
14 ospedaliero, Borgo Valsugana - Trento); Rosa Maria Teresa Cristaudo (Azienda USL della Valle  
15 d'Aosta, Aosta); Andrea Zipoli (Azienda USL 11, Ospedale San Giuseppe, Empoli - Firenze); Paolo  
16 Michele Accettura (Laboratorio analisi, Ospedale San Camillo, Atesa - Chieti).

17  
18  
19  
20 Local referents of HES 2018-2019 participating centers: Luigi Dell'Orso and Alessandro Grimaldi  
21 (Ospedale San Salvatore, L'Aquila); Nicola Giordano (ASL - Azienda Sanitaria Locale di Potenza,  
22 Potenza); Carmelo Caserta (Centro di Medicina Solidale – Associazione Calabrese di Epatologia,  
23 Reggio Calabria); Alessandra Fabbri (Casa della Salute AUSL RE, Montecchio Emilia); Fabrizio Ciaralli  
24 (Casa della Salute S. Caterina della Rosa, Rome); Fiorella Bagnasco (Municipality of Arenzano,  
25 Arenzano - Genova); Giuliana Rocca (ATS Bergamo); Giuseppe Salamina (ASL Città di Torino, Torino);  
26 Pietro Modesti (Università di Firenze, Florence); Federico Vancheri and Giulio Geraci (Ospedale S.  
27 Elia, Caltanissetta). Also we would to thank for HES 2018-2019: Anna Rita Ciccaglione, Cinzia  
28 Marcantonio, Roberto Bruni (ISS), Emanuele Bottosso and Anna Acampora (as trainee medical  
29 doctor at ISS), Giulia Cairella (ASL Roma 2, SINU) and Municipality of Potenza.

30  
31  
32 Administrative staff of the ANMCO/HCF: Giulia Salone, Angela Petrucci, Monica Nottoli; and to Laura  
33 Bellicini and to L Bellicini, consultant lawyer of the ANMCO-HCF. Fondazione IRCCS, Istituto  
34 nazionale dei tumori, Milano: Vittorio Krogh, Sara Grioni. Research Group MINISAL-GIRCSI and  
35 MENO SALE PIU' SALUTE: Pasquale Strazzullo, Ornella Russo, Lanfranco D'Elia, Roberto Iacone,  
36 Renato Ippolito, Enrico Agabiti-Rosei, Angelo Campanozzi, Marina Carcea, Ferruccio Galletti, Licia  
37 Iacoviello, Luca Scalfi, Alfonso Siani, Daniela Galeone, Chiara Donfrancesco, Simona Giampaoli.  
38 CARHES Research Group: Luca De Nicola, Chiara Donfrancesco, Roberto Minutolo, Cinzia Lo Noce,  
39 Luigi Palmieri, Amalia De Curtis, Licia Iacoviello, Carmine Zoccali, Loreto Gesualdo, Giuseppe Conte,  
40 Diego Vanuzzo, Simona Giampaoli. Italian Ministry of Health: Daniela Galeone, Paolo Bellisario,  
41 Giovanna Laurendi, Bianca Maria Polizzi. European Health Examination Survey, Reference Centre:  
42 Hanna Tolonen, Kari Kuulasmaa, Paivikki Koponen, Johan Heldan, Susanna Conti, Georg Alftan.  
43 Administrative staff of the ISS: Claudia Meduri, Tiziana Grisetti, Matilde Bocci, Gabriella Martelli,  
44 Valerio Occhiodoro, Maria Grazia Carella, Francesca Meduri.

45  
46  
47  
48 We acknowledge all persons who decided to participate to the 1998-2002, 2008-2012 and 2018-  
49 2019 surveys. A grateful thanks to Simona Giampaoli, research manager of the ISS, who founded  
50 the CUORE Project and coordinated with dedication the research activities until her retirement in  
51 2018.  
52  
53  
54  
55  
56  
57  
58  
59  
60



1  
2  
3  
4  
5  
6  
7  
8  
9  
10  
11  
12  
13  
14  
15  
16  
17  
18  
19  
20  
21  
22  
23  
24  
25  
26  
27  
28  
29  
30  
31  
32  
33  
34  
35  
36  
37  
38  
39  
40  
41  
42  
43  
44  
45  
46  
47  
48  
49  
50  
51  
52  
53  
54  
55  
56  
57  
58  
59  
60

## Funding

The Osservatorio Epidemiologico Cardiovascolare (OEC) 1998-2002 and the Osservatorio Epidemiologico Cardiovascolare/Health Examination Survey (OEC/HES) 2008-2012 within the CUORE Project were funded by the Italian Ministry of Health (MoH), by the Associazione Nazionale Medici Cardiologi Ospedalieri (ANMCO), by the Fondazione per il Tuo cuore onlus (Heart Care Foundation – HCF) and OEC/HES 2008-2012 also by the Joint Action of the European Health Examination Survey. The Health Examination Survey (HES) 2018-2019 within the CUORE Project was promoted and funded by the MoH -CCM for activities related to the CCM 2017 project - Central Actions Area - entitled "Monitoring of the average daily consumption of sodium in the Italian population". The OEC 1998-2002, OEC/HES 2008-2012 and HES 2018-2019 were also funded by the Italian National Institute of Health (Istituto Superiore di Sanità - ISS) through permanent staff salary and some travels refund.

**Competing Interests:** Italian Ministry of Health defined the needs and use of data for evidence based policy making and collaborate in the interpretation of results for health promotion and prevention activities and planning health services. Associazione Nazionale Medici Cardiologi Ospedalieri (ANMCO) and the Fondazione per il Tuo cuore onlus (Heart Care Foundation–HCF) had a role a role in the choice of collaborating centers, in the management of funding for the support of local centers and in the interpretation of results.

**Author Contributions:** Conceptualization, CD and LP; methodology, CD, CLN and LP; software, FV; formal analysis, CD; investigation, CD, CLN, ADL, EP and BB; resources, CD, DG, PB, LP and MMG ; data curation, CD, CLN and LP; writing—original draft preparation, CD; writing—review and editing, CD, ADL, CLN, EP, BB, FV, SV, FG, GO, MMG, DG, PB, and LP; visualization, CD; supervision, CD, LP and GO; project administration, CD; funding acquisition, CD, LP and MMG. All authors have read and agreed to the published version of the manuscript.”

**Informed Consent Statement:** All invited persons received an informative note and signed an informed consent to participate.

**Data Sharing Statement:** The data are not publicly available due to ethical and legal restrictions on data sharing.

**Ethics Approval Statement:** The study was conducted in accordance with the Declaration of Helsinki, and approved by the Ethical Committee of the Italian National Institute of Health (Istituto Superiore di Sanità - ISS) by 11 March 2008 (Prot. PRE 150/08), 11 November 2009 (Prot. PRE/569/09) and 14 March 2018 (Prot. PRE 1176/18).

## REFERENCES

1. Olsen MH, Angell SY, Asma S, Boutouyrie P, Burger D, Chirinos JA, et al. A call to action and a lifecourse strategy to address the global burden of raised blood pressure on current and future generations: the Lancet Commission on hypertension. *Lancet*. 2016 Nov 26;388(10060):2665-2712.
2. Improving hypertension control in 3 million people: country experiences of programme development and implementation. World Health Organization 2020. Available online (accessed on 22/03/2022) <https://www.who.int/publications/i/item/improving-hypertension-control-in-3-million-people-country-experiences-of-programme-development-and-implementation>.
3. WHO CVD Risk Chart Working Group. World Health Organization cardiovascular disease risk charts: revised models to estimate risk in 21 global regions. *Lancet Glob Health*. 2019 Oct;7(10):e1332-e1345.
4. Visseren FLJ, Mach F, Smulders YM, Carballo D, Koskinas KC, Bäck M, et al. ESC National Cardiac Societies; ESC Scientific Document Group. 2021 ESC Guidelines on cardiovascular disease prevention in clinical practice. *Eur Heart J*. 2021 Sep 7;42(34):3227-3337.
5. Giampaoli S, Palmieri L, Donfrancesco C, Panico S, Vanuzzo D, Pilotto L, et al, on behalf of The CUORE Project Research Group. Cardiovascular risk assessment in Italy: the CUORE Project risk score and risk chart. *Italian Journal of Public Health*, 2007; Year 5, Vol. 4, N. 2: 102-109.
6. WHO. Global Action Plan for the prevention and control of Noncommunicable Diseases 2013-2020. World Health Organization 2013.
7. WHO Discussion Paper For The Regional Expert Consultations - Development Of An Implementation Roadmap 2023–2030 For The Global Action Plan For The Prevention And Control Of Ncds 2013–2030. (Version Dated 20 August 2021) Available online (accessed on 22/03/2022) <https://www.who.int/publications/m/item/implementation-roadmap-2023-2030-for-the-who-global-action-plan-for-the-prevention-and-control-of-ncds-2023-2030>.
8. Noncommunicable Diseases Country Profiles 2018. World Health Organization 2018. Available online (accessed on 22/03/2022): <https://apps.who.int/iris/handle/10665/274512>.
9. A Comprehensive Global Monitoring Framework, Including Indicators, And A Set Of Voluntary Global Targets For The Prevention And Control Of Noncommunicable Diseases WHO 2012. Available online (accessed on 22/03/2022) [https://www.who.int/nmh/events/2012/discussion\\_paper2\\_20120322.pdf](https://www.who.int/nmh/events/2012/discussion_paper2_20120322.pdf)
10. Noncommunicable Diseases Global Monitoring Framework: Indicator Definitions and Specifications (WHO 2014). Available online (accessed on 22/03/2022) <https://www.who.int/publications/i/item/ncd-gmf-indicator-definitions-and-specifications>.
11. Donfrancesco C, Profumo E, Lo Noce C, Minutoli D, Di Lonardo A, Buttari B, et al. Trends of overweight, obesity and anthropometric measurements among the adult population in Italy: The CUORE Project health examination surveys 1998, 2008, and 2018. *PLoS One*. 2022 Mar 1;17(3):e0264778.
12. Donfrancesco C, Lo Noce C, Russo O, Minutoli D, Di Lonardo A, Profumo E, et al. Trend of salt intake measured by 24-h urine collection in the Italian adult population between the 2008 and 2018 CUORE project surveys. *Nutr Metab Cardiovasc Dis*. 2021 Mar 10;31(3):802-813.
13. Donfrancesco C, Lo Noce C, Russo O, Buttari B, Profumo E, Minutoli D, et al. Trend in potassium intake and Na/K ratio in the Italian adult population between the 2008 and 2018 CUORE project surveys. *Nutr Metab Cardiovasc Dis*. 2021 Mar 10;31(3):814-826.
14. Giampaoli S, Palmieri L, Donfrancesco C, Lo Noce C, Pilotto L, Vanuzzo D; Osservatorio Epidemiologico Cardiovascolare/Health Examination Survey Research Group. Cardiovascular

- 1  
2  
3 health in Italy. Ten-year surveillance of cardiovascular diseases and risk factors: Osservatorio  
4 Epidemiologico Cardiovascolare/Health Examination Survey 1998-2012. *Eur J Prev Cardiol.* 2015  
5 Sep;22(2 Suppl):9-37.  
6  
7 15. European Health Examination Survey (EHES) – Measuring the Health of Europeans. Available  
8 online (accessed on 22/03/2022): [http://www.ehes.info/national/national\\_hes\\_status.htm](http://www.ehes.info/national/national_hes_status.htm)  
9  
10 16. Tolonen H, Koponen P, Naska A, Männistö S, Broda G, et al; EHES Pilot Project. Challenges in  
11 standardization of blood pressure measurement at the population level. *BMC Med Res*  
12 *Methodol.* 2015 Apr 10;15:33.  
13  
14 17. Williams B, Mancia G, Spiering W, Agabiti Rosei E, Azizi M, Burnier M, et al; ESC Scientific  
15 Document Group. 2018 ESC/ESH Guidelines for the management of arterial hypertension. *Eur*  
16 *Heart J.* 2018 Sep 1;39(33):3021-3104.  
17  
18 18. National Institute of Statistics. Resident population 1991-2019. Available online (accessed on  
19 22/03/2022) [http://dati.istat.it/Index.aspx?DataSetCode=DCIS\\_RICPOPRES2011](http://dati.istat.it/Index.aspx?DataSetCode=DCIS_RICPOPRES2011)  
20  
21 19. Revision of the European Standard Population - Report of Eurostat's task force - 2013 edition  
22 Available online (accessed on 22/03/2022)  
23 [https://ec.europa.eu/eurostat/documents/3859598/5926869/KS-RA-13-028-](https://ec.europa.eu/eurostat/documents/3859598/5926869/KS-RA-13-028-EN.PDF/e713fa79-1add-44e8-b23d-5e8fa09b3f8f)  
24 [EN.PDF/e713fa79-1add-44e8-b23d-5e8fa09b3f8f](https://ec.europa.eu/eurostat/documents/3859598/5926869/KS-RA-13-028-EN.PDF/e713fa79-1add-44e8-b23d-5e8fa09b3f8f)  
25  
26 20. NCD Risk Factor Collaboration (NCD-RisC). Worldwide trends in hypertension prevalence and  
27 progress in treatment and control from 1990 to 2019: a pooled analysis of 1201 population-  
28 representative studies with 104 million participants. *Lancet* 2021; 398: 957–80.  
29  
30 21. NCD Risk Factor Collaboration (NCD-RisC) <https://ncdrisc.org/obesity-prevalence-ranking.html>  
31  
32 22. WHO. High blood pressure - country experiences and effective interventions utilized across the  
33 European Region. World Health Organization 2013. Available online (accessed on 22/03/2022)  
34 [https://www.euro.who.int/\\_\\_data/assets/pdf\\_file/0008/185903/e96816.pdf](https://www.euro.who.int/__data/assets/pdf_file/0008/185903/e96816.pdf)  
35  
36 23. Strazzullo P, Cairella G, Campanozzi A, Carcea M, Galeone D, Galletti F, et al. Population based  
37 strategy for dietary salt intake reduction: Italian initiatives in the European framework. for the  
38 GIRCSI Working Group *Nutr Metabol Cardiovasc Dis* 2012 Mar; 22(3):161e6.  
39  
40 24. Bann, D., Fluharty, M., Hardy, R., Scholes S. Socioeconomic inequalities in blood pressure: co-  
41 ordinated analysis of 147,775 participants from repeated birth cohort and cross-sectional  
42 datasets, 1989 to 2016. *BMC Med* 18, 338 (2020).  
43  
44 25. CUOREDATA platform - The CUORE Project <http://www.cuore.iss.it/eng/survey/cuoredata>.  
45  
46 26. Venezia A, Barba G, Russo O, Capasso C, De Luca V, Farinero E, et al. Dietary sodium intake in a  
47 sample of adult male population in southern Italy: results of the Olivetti Heart Study. *Eur J Clin*  
48 *Nutr.* 2010 May;64(5):518-24.  
49  
50 27. European Society of Hypertension-European Society of Cardiology Guidelines Committee. 2003  
51 European Society of Hypertension-European Society of Cardiology guidelines for the  
52 management of arterial hypertension. *J Hypertens.* 2003 Jun;21(6):1011-53.  
53  
54 28. Mancia G, De Backer G, Dominiczak A, Cifkova R, Fagard R, Germano G, et al; European Society  
55 of Hypertension; European Society of Cardiology. 2007 ESH-ESC Guidelines for the management  
56 of arterial hypertension: the task force for the management of arterial hypertension of the  
57 European Society of Hypertension (ESH) and of the European Society of Cardiology (ESC). *Blood*  
58 *Press.* 2007;16(3):135-232.  
59  
60 29. Mancia G, Fagard R, Narkiewicz K, Redón J, Zanchetti A, Böhm M, et; Task Force Members. 2013  
ESH/ESC Guidelines for the management of arterial hypertension: the Task Force for the  
management of arterial hypertension of the European Society of Hypertension (ESH) and of the  
European Society of Cardiology (ESC). *J Hypertens.* 2013 Jul;31(7):1281-357.

- 1
- 2
- 3 30. Wing LM, Reid CM, Ryan P, Beilin LJ, Brown MA, Jennings GL, et al; Second Australian National
- 4 Blood Pressure Study Group. A comparison of outcomes with angiotensin-converting--enzyme
- 5 inhibitors and diuretics for hypertension in the elderly. *N Engl J Med*. 2003 Feb 13;348(7):583-
- 6 92.
- 7
- 8 31. Palmieri L, Bennett K, Giampaoli S, Capewell S. Explaining the Decrease in Coronary Heart
- 9 Disease Mortality in Italy between 1980 and 2000. *Am J Public Health*. 2010 Apr;100(4):684-92.
- 10 32. Ogata S, Nishimura K, Guzman-Castillo M, Sumita Y, Nakai M, et al. Explaining the decline in
- 11 coronary heart disease mortality rates in Japan: Contributions of changes in risk factors and
- 12 evidence-based treatments between 1980 and 2012. *Int J Cardiol*. 2019 Sep 15;291:183-188.
- 13 33. Mindell JS, Giampaoli S, Goesswald A, Kamtsiuris P, Mann C, Männistö S, et al. Sample selection,
- 14 recruitment and participation rates in health examination surveys in Europe experience from
- 15 seven national surveys. *BMC Med Res Methodol*. 2015;15:78.
- 16 34. Italian National Institute of Statistics. Population education levels and occupational returns: the
- 17 main indicators. ISTAT 2017. Available online (accessed on 22/03/2022):
- 18 <https://www.istat.it/it/files/2018/07/Indicatori-dellistruzione.pdf>
- 19 35. European Commission. Commission Regulation (EU) No 847/2012 on 19 September 2012
- 20 amending Annex XVII to Regulation (EC) No 1907/2006 of the European Parliament and of the
- 21 council on the registration, evaluation, authorisation and restriction of chemicals (REACH) as
- 22 regards mercury. In 847/2012. Edited by European Commission. *Off J Eur Union*, L253,
- 23 20.9.2012.
- 24 36. Ostchega Y, Zhang G, Sorlie P, Hughes JP, Reed-Gillette DS, Nwankwo T, et al. Blood pressure
- 25 randomized methodology study comparing automatic oscillometric and mercury
- 26 sphygmomanometer devices: national health and nutrition examination survey, 2009–2010.
- 27 *Natl Health Stat Report*. 2012: (59):1–15
- 28 37. Chen Z, Wang X, Wang Z, Zhang L, Hao G, Dong Y, et al; China Hypertension Survey Group.
- 29 Assessing the validity of oscillometric device for blood pressure measurement in a large
- 30 population-based epidemiologic study. *J Am Soc Hypertens*. 2017 Nov;11(11):730-736.e4.
- 31 38. El Assaad, Mohamed A.; Topouchian, Jirar A.; Darné, Bernadette M.; Asmar, Roland
- 32 G. Validation of the Omron HEM-907 device for blood pressure measurement, *Blood Pressure*
- 33 *Monitoring: August 2002 - Volume 7 - Issue 4 - p 237-241*.
- 34 39. de Greeff A, Lorde I, Wilton A, Seed P, Coleman AJ, Shennan AH. Calibration accuracy of
- 35 hospital-based non-invasive blood pressure measuring devices. *J Hum Hypertens*.
- 36 2010;24(1):58–63.
- 37 40. HK Wolf, J Tuomilehto, K Kuulasmaa, S Domarkiene, Z Cepaitis, A Molarius, et al. Blood pressure
- 38 levels in the 41 populations of the WHO MONICA Project. *Journal of Human Hypertension*
- 39 (1997) 11, 733–742.
- 40
- 41
- 42
- 43
- 44
- 45
- 46
- 47
- 48
- 49
- 50
- 51
- 52
- 53
- 54
- 55
- 56
- 57
- 58
- 59
- 60

## FIGURES

**Figure 1. Mean of blood pressure and prevalence of raised blood pressure, hypertension and controlled hypertension based on measurements, by age class, educational level, and period. Italian resident men aged 35-74 years, the CUORE Project Surveys 1998–2002, 2008–2012, and 2018–2019.**

Bars refer to 95% confidence intervals. Statistics by educational level were age-standardized by Italian National Institute of Statistics-ISTAT Italian population 2000, 2010, and 2019, respectively. Higher education—high school or college; lower education—primary or middle school. Raised blood pressure: systolic blood pressure  $\geq 140$  mmHg and/or diastolic blood pressure  $\geq 90$  mmHg. Hypertension: systolic blood pressure  $\geq 140$  mmHg and/or diastolic blood pressure  $\geq 90$  mmHg and/or under specific pharmacological treatment. Controlled hypertension: under drug treatment for hypertension with systolic blood pressure  $< 140$  mmHg and diastolic blood pressure  $< 90$  mmHg. Pool of the following Italian Regions: Piedmont, Lombardy, Liguria, Emilia Romagna, Tuscany, Lazio, Abruzzo, Basilicata, Calabria, and Sicily.

**Figure 2. Mean of blood pressure and prevalence of raised blood pressure, hypertension and controlled hypertension based on measurements, by age class, educational level, and period. Italian resident women aged 35-74 years, the CUORE Project Surveys 1998–2002, 2008–2012, and 2018–2019.**

Bars refer to 95% confidence intervals. Statistics by educational level were age-standardized by Italian National Institute of Statistics-ISTAT Italian population 2000, 2010, and 2019, respectively. Higher education—high school or college; lower education—primary or middle school. Raised blood pressure: systolic blood pressure  $\geq 140$  mmHg and/or diastolic blood pressure  $\geq 90$  mmHg. Hypertension: systolic blood pressure  $\geq 140$  mmHg and/or diastolic blood pressure  $\geq 90$  mmHg and/or under specific pharmacological treatment. Controlled hypertension: under drug treatment for hypertension with systolic blood pressure  $< 140$  mmHg and diastolic blood pressure  $< 90$  mmHg. Pool of the following Italian Regions: Piedmont, Lombardy, Liguria, Emilia Romagna, Tuscany, Lazio, Abruzzo, Basilicata, Calabria, and Sicily.

**Figure 3. Prevalence of raised blood pressure based on measurements, by sex, Regions, and period. Italian resident men and women aged 35-74 years, the CUORE Project Surveys 1998–2002, 2008–2012, and 2018–2019.**

Italian Regions: Piedmont, Lombardy, Liguria, Emilia Romagna, Tuscany, Lazio, Abruzzo, Basilicata, Calabria, and Sicily. Prevalences were age-standardized by Italian National Institute of Statistics-ISTAT Italian population 2000, 2010, and 2019, respectively. Raised blood pressure: systolic blood pressure  $\geq 140$  mmHg and/or diastolic blood pressure  $\geq 90$  mmHg.

**Figure 4. Prevalence of hypertension based on measurements, by sex, Regions, and period. Italian resident men and women aged 35-74 years, the CUORE Project Surveys 1998–2002, 2008–2012, and 2018–2019.**

Italian Regions: Piedmont, Lombardy, Liguria, Emilia Romagna, Tuscany, Lazio, Abruzzo, Basilicata, Calabria, and Sicily. Prevalences were age-standardized by Italian National Institute of Statistics-ISTAT Italian population 2000, 2010, and 2019, respectively. Hypertension: systolic blood pressure  $\geq 140$  mmHg and/or diastolic blood pressure  $\geq 90$  mmHg and/or under specific pharmacological treatment.

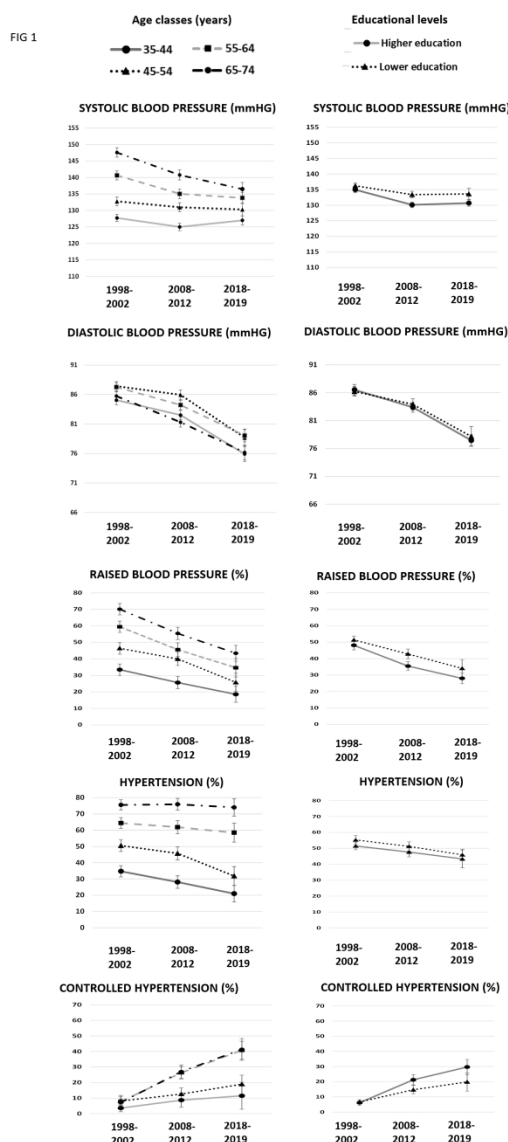

Figure 1. Mean of blood pressure and prevalence of raised blood pressure, hypertension and controlled hypertension based on measurements, by age class, educational level, and period. Italian resident men aged 35-74 years, the CUORE Project Surveys 1998-2002, 2008-2012, and 2018-2019.

Bars refer to 95% confidence intervals. Statistics by educational level were age-standardized by Italian National Institute of Statistics-ISTAT Italian population 2000, 2010, and 2019, respectively. Higher education—high school or college; lower education—primary or middle school. Raised blood pressure: systolic blood pressure  $\geq 140$  mmHg and/or diastolic blood pressure  $\geq 90$  mmHg. Hypertension: systolic blood pressure  $\geq 140$  mmHg and/or diastolic blood pressure  $\geq 90$  mmHg and/or under specific pharmacological treatment. Controlled hypertension: under drug treatment for hypertension with systolic blood pressure  $< 140$  mmHg and diastolic blood pressure  $< 90$  mmHg. Pool of the following Italian Regions: Piedmont, Lombardy, Liguria, Emilia Romagna, Tuscany, Lazio, Abruzzo, Basilicata, Calabria, and Sicily.

322x586mm (150 x 150 DPI)

1  
2  
3  
4  
5  
6  
7  
8  
9  
10  
11  
12  
13  
14  
15  
16  
17  
18  
19  
20  
21  
22  
23  
24  
25  
26  
27  
28  
29  
30  
31  
32  
33  
34  
35  
36  
37  
38  
39  
40  
41  
42  
43  
44  
45  
46  
47  
48  
49  
50  
51  
52  
53  
54  
55  
56  
57  
58  
59  
60



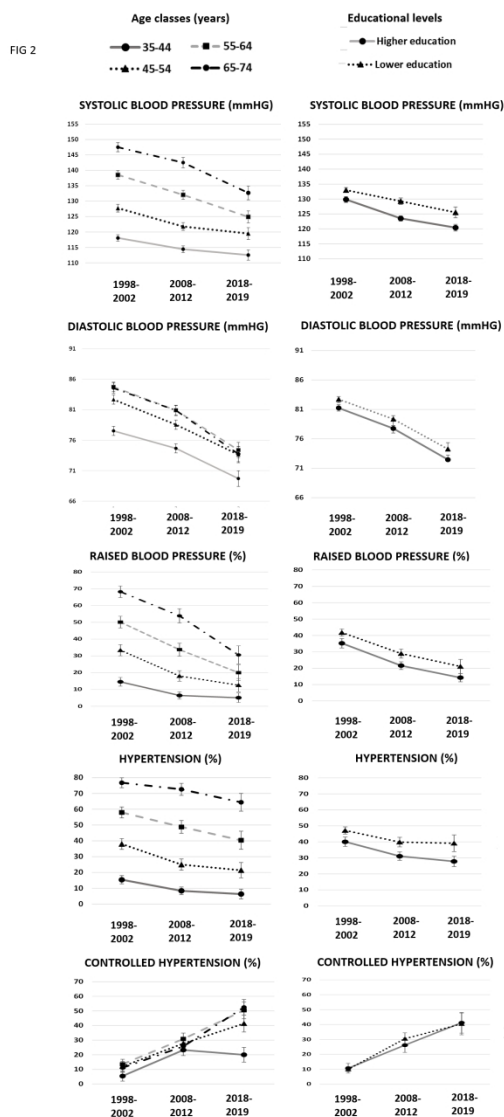

Figure 2. Mean of blood pressure and prevalence of raised blood pressure, hypertension and controlled hypertension based on measurements, by age class, educational level, and period. Italian resident women aged 35-74 years, the CUORE Project Surveys 1998-2002, 2008-2012, and 2018-2019.

Bars refer to 95% confidence intervals. Statistics by educational level were age-standardized by Italian National Institute of Statistics-ISTAT Italian population 2000, 2010, and 2019, respectively. Higher education—high school or college; lower education—primary or middle school. Raised blood pressure: systolic blood pressure  $\geq 140$  mmHg and/or diastolic blood pressure  $\geq 90$  mmHg. Hypertension: systolic blood pressure  $\geq 140$  mmHg and/or diastolic blood pressure  $\geq 90$  mmHg and/or under specific pharmacological treatment. Controlled hypertension: under drug treatment for hypertension with systolic blood pressure  $< 140$  mmHg and diastolic blood pressure  $< 90$  mmHg. Pool of the following Italian Regions: Piedmont, Lombardy, Liguria, Emilia Romagna, Tuscany, Lazio, Abruzzo, Basilicata, Calabria, and Sicily.

366x594mm (150 x 150 DPI)



1  
2  
3  
4  
5  
6  
7  
8  
9  
10  
11  
12  
13  
14  
15  
16  
17  
18  
19  
20  
21  
22  
23  
24  
25  
26  
27  
28  
29  
30  
31  
32  
33  
34  
35  
36  
37  
38  
39  
40  
41  
42  
43  
44  
45  
46  
47  
48  
49  
50  
51  
52  
53  
54  
55  
56  
57  
58  
59  
60

Fig 3

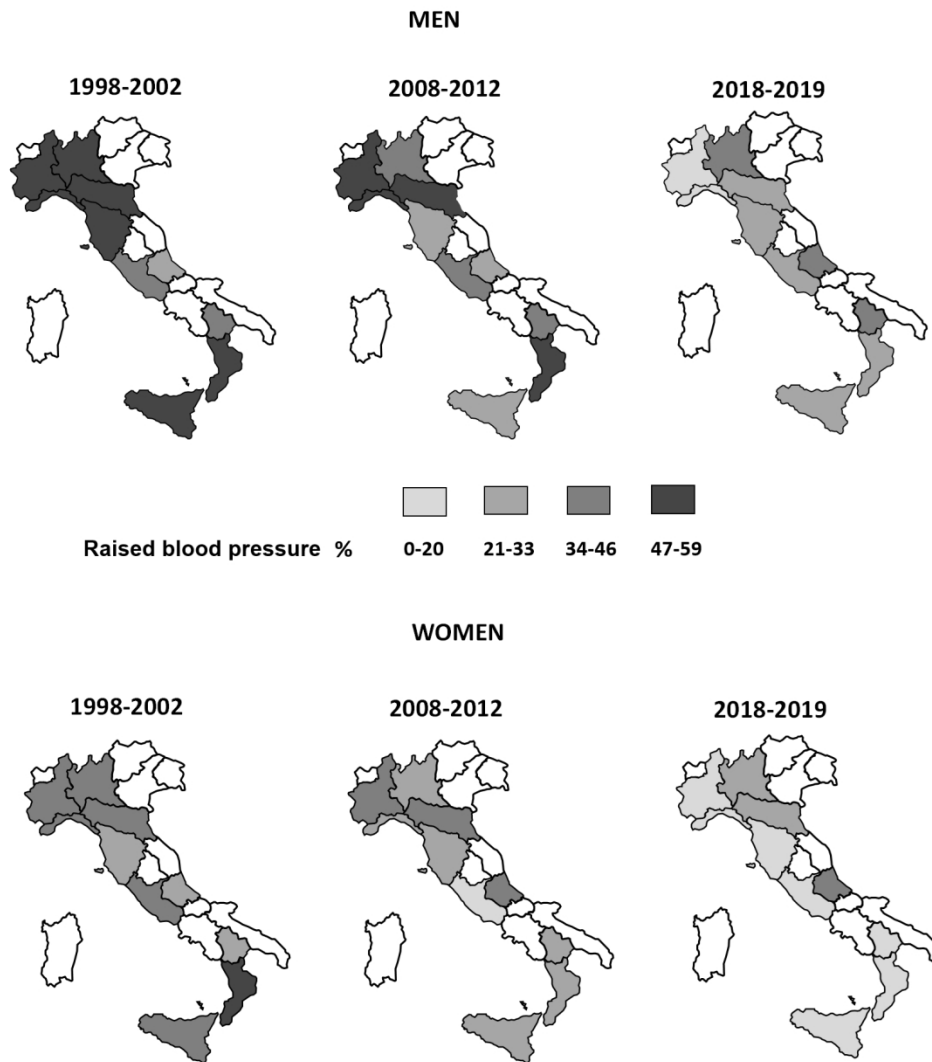

Figure 3. Prevalence of raised blood pressure based on measurements, by sex, Regions, and period. Italian resident men and women aged 35-74 years, the CUORE Project Surveys 1998-2002, 2008-2012, and 2018-2019.

Italian Regions: Piedmont, Lombardy, Liguria, Emilia Romagna, Tuscany, Lazio, Abruzzo, Basilicata, Calabria, and Sicily. Prevalences were age-standardized by Italian National Institute of Statistics-ISTAT Italian population 2000, 2010, and 2019, respectively. Raised blood pressure: systolic blood pressure  $\geq 140$  mmHg and/or diastolic blood pressure  $\geq 90$  mmHg.

287x345mm (150 x 150 DPI)

Fig 4

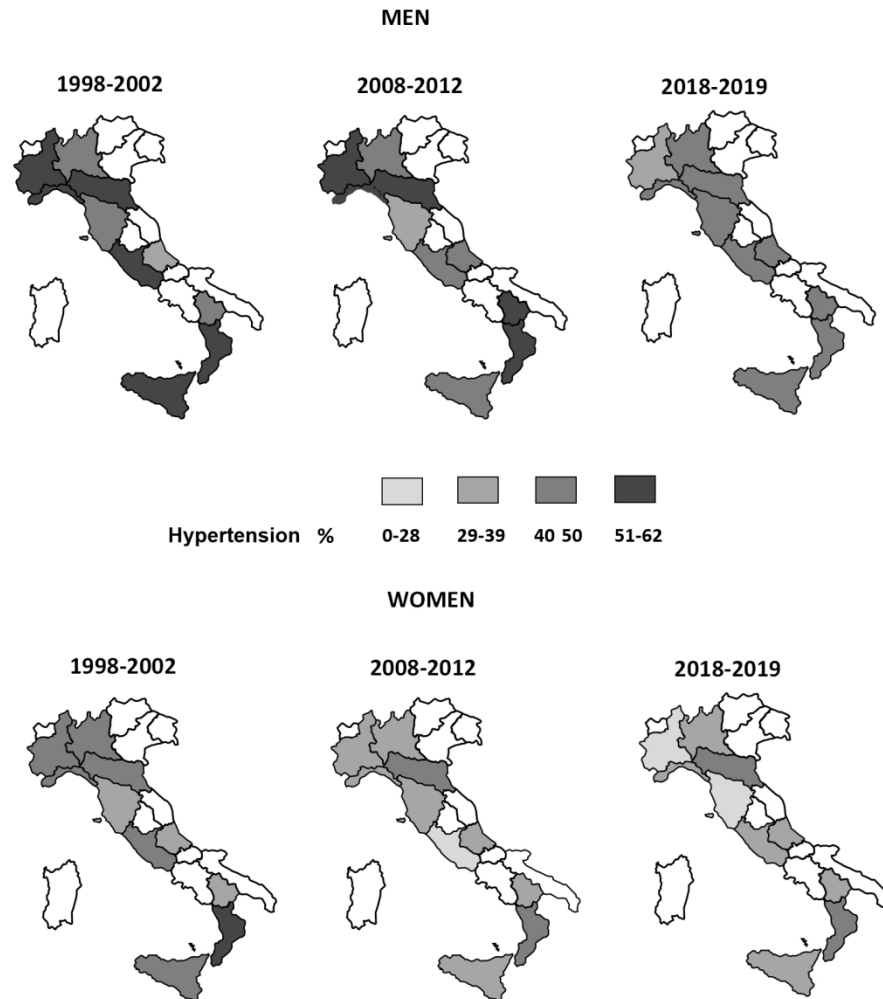

Figure 4. Prevalence of hypertension based on measurements, by sex, Regions, and period. Italian resident men and women aged 35-74 years, the CUORE Project Surveys 1998-2002, 2008-2012, and 2018-2019. Italian Regions: Piedmont, Lombardy, Liguria, Emilia Romagna, Tuscany, Lazio, Abruzzo, Basilicata, Calabria, and Sicily. Prevalences were age-standardized by Italian National Institute of Statistics-ISTAT Italian population 2000, 2010, and 2019, respectively. Hypertension: systolic blood pressure  $\geq 140$  mmHg and/or diastolic blood pressure  $\geq 90$  mmHg and/or under specific pharmacological treatment.

287x367mm (150 x 150 DPI)

**Table S1. Demographic characteristics of men and women with available blood pressure measurements and information on the use of specific drug treatment within the CUORE Project Surveys 1998-2002, 2008-2012 and 2018-2019.**

|                          |                  | <b>MEN</b>       |          |                  |          |                  |          |
|--------------------------|------------------|------------------|----------|------------------|----------|------------------|----------|
|                          |                  | <b>1998-2002</b> |          | <b>2008-2012</b> |          | <b>2018-2019</b> |          |
|                          |                  | <b>n</b>         | <b>%</b> | <b>n</b>         | <b>%</b> | <b>n</b>         | <b>%</b> |
| <b>Age class (years)</b> |                  |                  |          |                  |          |                  |          |
|                          | 35-44            | 717              | 24       | 530              | 24       | 248              | 24       |
|                          | 45-54            | 752              | 25       | 588              | 27       | 248              | 24       |
|                          | 55-64            | 784              | 26       | 564              | 25       | 277              | 27       |
|                          | 65-74            | 732              | 25       | 536              | 24       | 258              | 25       |
| <b>Educational level</b> |                  |                  |          |                  |          |                  |          |
|                          |                  | <b>n</b>         | <b>%</b> | <b>n</b>         | <b>%</b> | <b>n</b>         | <b>%</b> |
|                          | Higher education | 1249             | 42       | 1183             | 54       | 725              | 71       |
|                          | Lower education  | 1730             | 58       | 1018             | 46       | 303              | 29       |
|                          |                  | <b>WOMEN</b>     |          |                  |          |                  |          |
|                          |                  | <b>1998-2002</b> |          | <b>2008-2012</b> |          | <b>2018-2019</b> |          |
|                          |                  | <b>n</b>         | <b>%</b> | <b>n</b>         | <b>%</b> | <b>n</b>         | <b>%</b> |
| <b>Age class (years)</b> |                  |                  |          |                  |          |                  |          |
|                          | 35-44            | 715              | 24       | 514              | 23       | 237              | 22       |
|                          | 45-54            | 769              | 26       | 577              | 26       | 271              | 25       |
|                          | 55-64            | 778              | 26       | 584              | 27       | 280              | 26       |
|                          | 65-74            | 693              | 23       | 529              | 24       | 278              | 26       |
| <b>Educational level</b> |                  |                  |          |                  |          |                  |          |
|                          |                  | <b>n</b>         | <b>%</b> | <b>n</b>         | <b>%</b> | <b>n</b>         | <b>%</b> |
|                          | Higher education | 1052             | 36       | 1167             | 53       | 725              | 68       |
|                          | Lower education  | 1887             | 64       | 1017             | 47       | 339              | 32       |

Pool of the following Italian Regions: Piedmont, Lombardy, Liguria, Emilia Romagna, Tuscany, Lazio, Abruzzo, Basilicata, Calabria, and Sicily. Higher education - high school or college; lower education - primary or middle school.

Table S2. Blood pressure and heart rate measurements mean levels by age class and period. Italian resident men aged 35–74 years, the CUORE Project Surveys 1998–2002, 2008–2012 and 2018–2019.

## MEN

| Systolic blood pressure (mmHg) |           |      |    |        |                              |           |      |    |        |                              |           |      |    |        |                              |                        |             |                        |             |
|--------------------------------|-----------|------|----|--------|------------------------------|-----------|------|----|--------|------------------------------|-----------|------|----|--------|------------------------------|------------------------|-------------|------------------------|-------------|
| Age class (years)              | 1998–2002 |      |    |        | ANOVA within period sign *** | 2008–2012 |      |    |        | ANOVA within period sign *** | 2018–2019 |      |    |        | ANOVA within period sign *** | 2018–2019 vs 1998–2002 |             | 2018–2019 vs 2008–2012 |             |
|                                | n         | mean | DS | 95% CI |                              | n         | mean | DS | 95% CI |                              | n         | mean | DS | 95% CI |                              | Diff                   | t-test sign | Diff                   | t-test sign |
| 35–44                          | 717       | 128  | 15 | 127    | 129                          | 530       | 125  | 13 | 124    | 126                          | 248       | 127  | 11 | 126    | 128                          | -1                     | ns          | 2                      | *           |
| 45–54                          | 752       | 133  | 18 | 131    | 134                          | 588       | 131  | 16 | 130    | 132                          | 248       | 130  | 16 | 128    | 132                          | -2                     | *           | -1                     | ns          |
| 55–64                          | 784       | 141  | 20 | 139    | 142                          | 564       | 135  | 17 | 134    | 136                          | 277       | 134  | 14 | 132    | 135                          | -7                     | ***         | -1                     | ns          |
| 65–74                          | 732       | 148  | 20 | 146    | 149                          | 536       | 141  | 18 | 139    | 142                          | 258       | 136  | 17 | 134    | 138                          | -11                    | ***         | -4                     | **          |

  

| Diastolic blood pressure (mmHg) |           |      |    |        |                              |           |      |    |        |                              |           |      |    |        |                             |                        |             |                        |             |
|---------------------------------|-----------|------|----|--------|------------------------------|-----------|------|----|--------|------------------------------|-----------|------|----|--------|-----------------------------|------------------------|-------------|------------------------|-------------|
| Age class (years)               | 1998–2002 |      |    |        | ANOVA within period sign *** | 2008–2012 |      |    |        | ANOVA within period sign *** | 2018–2019 |      |    |        | ANOVA within period sign ** | 2018–2019 vs 1998–2002 |             | 2018–2019 vs 2008–2012 |             |
|                                 | n         | mean | DS | 95% CI |                              | n         | mean | DS | 95% CI |                              | n         | mean | DS | 95% CI |                             | Diff                   | t-test sign | Diff                   | t-test sign |
| 35–44                           | 717       | 85   | 11 | 84     | 86                           | 530       | 83   | 10 | 82     | 83                           | 248       | 76   | 10 | 75     | 77                          | -9                     | ***         | -7                     | ***         |
| 45–54                           | 752       | 87   | 11 | 87     | 88                           | 588       | 86   | 10 | 85     | 87                           | 248       | 79   | 11 | 77     | 80                          | -9                     | ***         | -7                     | ***         |
| 55–64                           | 784       | 87   | 11 | 87     | 88                           | 564       | 84   | 10 | 83     | 85                           | 277       | 79   | 9  | 78     | 80                          | -8                     | ***         | -5                     | ***         |
| 65–74                           | 732       | 86   | 10 | 85     | 86                           | 536       | 81   | 10 | 80     | 82                           | 258       | 76   | 10 | 75     | 77                          | -10                    | ***         | -5                     | ***         |

  

| Systolic blood pressure not under drug treatment (mmHg) |           |      |    |        |                              |           |      |    |        |                              |           |      |    |        |                              |                        |             |                        |             |
|---------------------------------------------------------|-----------|------|----|--------|------------------------------|-----------|------|----|--------|------------------------------|-----------|------|----|--------|------------------------------|------------------------|-------------|------------------------|-------------|
| Age class (years)                                       | 1998–2002 |      |    |        | ANOVA within period sign *** | 2008–2012 |      |    |        | ANOVA within period sign *** | 2018–2019 |      |    |        | ANOVA within period sign *** | 2018–2019 vs 1998–2002 |             | 2018–2019 vs 2008–2012 |             |
|                                                         | n         | mean | DS | 95% CI |                              | n         | mean | DS | 95% CI |                              | n         | mean | DS | 95% CI |                              | Diff                   | t-test sign | Diff                   | t-test sign |
| 35–44                                                   | 682       | 127  | 14 | 126    | 128                          | 504       | 125  | 13 | 123    | 126                          | 237       | 127  | 11 | 125    | 128                          | -0.2                   | ns          | 2                      | *           |
| 45–54                                                   | 640       | 131  | 17 | 130    | 132                          | 481       | 129  | 16 | 127    | 130                          | 212       | 128  | 14 | 126    | 130                          | -3                     | *           | -1                     | ns          |
| 55–64                                                   | 581       | 137  | 19 | 136    | 139                          | 370       | 133  | 17 | 131    | 135                          | 170       | 133  | 14 | 131    | 135                          | -4                     | **          | -0.2                   | ns          |
| 65–74                                                   | 454       | 143  | 20 | 142    | 145                          | 252       | 138  | 18 | 136    | 140                          | 125       | 138  | 18 | 134    | 141                          | -6                     | **          | -1                     | ns          |

  

| Diastolic blood pressure not under drug treatment (mmHg) |           |      |    |        |                             |           |      |    |        |                              |           |      |    |        |                             |                        |             |                        |             |
|----------------------------------------------------------|-----------|------|----|--------|-----------------------------|-----------|------|----|--------|------------------------------|-----------|------|----|--------|-----------------------------|------------------------|-------------|------------------------|-------------|
| Age class (years)                                        | 1998–2002 |      |    |        | ANOVA within period sign ** | 2008–2012 |      |    |        | ANOVA within period sign *** | 2018–2019 |      |    |        | ANOVA within period sign ns | 2018–2019 vs 1998–2002 |             | 2018–2019 vs 2008–2012 |             |
|                                                          | n         | mean | DS | 95% CI |                             | n         | mean | DS | 95% CI |                              | n         | mean | DS | 95% CI |                             | Diff                   | t-test sign | Diff                   | t-test sign |
| 35–44                                                    | 682       | 85   | 10 | 84     | 85                          | 504       | 82   | 10 | 81     | 83                           | 237       | 75   | 10 | 74     | 77                          | -9                     | ***         | -7                     | ***         |
| 45–54                                                    | 640       | 86   | 11 | 86     | 87                          | 481       | 85   | 10 | 84     | 86                           | 212       | 77   | 10 | 76     | 78                          | -9                     | ***         | -8                     | ***         |
| 55–64                                                    | 581       | 86   | 10 | 85     | 87                          | 370       | 84   | 10 | 83     | 85                           | 170       | 78   | 9  | 77     | 79                          | -8                     | ***         | -6                     | ***         |
| 65–74                                                    | 454       | 84   | 10 | 83     | 85                          | 252       | 81   | 10 | 80     | 82                           | 125       | 77   | 11 | 75     | 79                          | -8                     | ***         | -4                     | **          |

  

| Heart rate (beats per minute) |           |      |    |        |                             |           |      |    |        |                             |           |      |    |        |                             |                        |             |                        |             |
|-------------------------------|-----------|------|----|--------|-----------------------------|-----------|------|----|--------|-----------------------------|-----------|------|----|--------|-----------------------------|------------------------|-------------|------------------------|-------------|
| Age class (years)             | 1998–2002 |      |    |        | ANOVA within period sign ns | 2008–2012 |      |    |        | ANOVA within period sign ns | 2018–2019 |      |    |        | ANOVA within period sign ns | 2018–2019 vs 1998–2002 |             | 2018–2019 vs 2008–2012 |             |
|                               | n         | mean | DS | 95% CI |                             | n         | mean | DS | 95% CI |                             | n         | mean | DS | 95% CI |                             | Diff                   | t-test sign | Diff                   | t-test sign |
| 35–44                         | 715       | 66   | 10 | 65     | 67                          | 530       | 68   | 9  | 67     | 69                          | 248       | 72   | 12 | 70     | 73                          | 6                      | ***         | 4                      | ***         |
| 45–54                         | 750       | 66   | 11 | 65     | 67                          | 588       | 69   | 10 | 68     | 70                          | 248       | 72   | 11 | 71     | 74                          | 6                      | ***         | 3                      | ***         |
| 55–64                         | 783       | 66   | 11 | 65     | 67                          | 564       | 68   | 10 | 68     | 69                          | 277       | 72   | 12 | 70     | 73                          | 6                      | ***         | 3                      | ***         |
| 65–74                         | 732       | 66   | 11 | 65     | 67                          | 536       | 69   | 10 | 68     | 69                          | 258       | 70   | 12 | 69     | 72                          | 4                      | ***         | 2                      | ns          |

SD: standard deviation; CI: confidence interval. Diff: mean difference between 2018–2019 and 1998–2002 or 2018–2019 and 2008–2012; the values are approximated taking into account the first decimal of means. ANOVA: Analysis of Variance to compare variables among age classes within periods. t-test to compare variables between periods. \*\*\* p-value<0.0001; \*\* p-value<0.01; \*p-value<0.05; ns not significant p-value. Pool of the following Italian Regions: Piedmont, Lombardy, Liguria, Emilia Romagna, Tuscany, Lazio, Abruzzo, Basilicata, Calabria, and Sicily.

**Table S3. Blood pressure and heart rate measurements mean levels by age class and period. Italian resident women aged 35–74 years, the CUORE Project Surveys 1998-2002, 2008-2012 and 2018-2019.**

| WOMEN                                                    |           |      |    |         |                          |           |      |    |         |                          |           |      |    |         |                          |                        |             |                        |             |
|----------------------------------------------------------|-----------|------|----|---------|--------------------------|-----------|------|----|---------|--------------------------|-----------|------|----|---------|--------------------------|------------------------|-------------|------------------------|-------------|
| Systolic blood pressure (mmHg)                           |           |      |    |         |                          |           |      |    |         |                          |           |      |    |         |                          |                        |             |                        |             |
| Age class (years)                                        | 1998-2002 |      |    |         | ANOVA within period sign | 2008-2012 |      |    |         | ANOVA within period sign | 2018-2019 |      |    |         | ANOVA within period sign | 2018-2019 vs 1998-2002 |             | 2018-2019 vs 2008-2012 |             |
|                                                          | n         | mean | DS | 95% CI  |                          | n         | mean | DS | 95% CI  |                          | n         | mean | DS | 95% CI  |                          | Diff                   | t-test sign | Diff                   | t-test sign |
| 35-44                                                    | 715       | 118  | 14 | 117 119 | ***                      | 514       | 114  | 13 | 113 116 | ***                      | 237       | 113  | 13 | 111 114 | ***                      | -6                     | ***         | -2                     | ns          |
| 45-54                                                    | 769       | 128  | 18 | 126 129 |                          | 577       | 122  | 15 | 121 123 |                          | 271       | 120  | 16 | 118 121 |                          | -8                     | ***         | -2                     | *           |
| 55-64                                                    | 778       | 139  | 20 | 137 140 |                          | 584       | 132  | 18 | 131 134 |                          | 280       | 125  | 16 | 123 127 |                          | -14                    | ***         | -7                     | ***         |
| 65-74                                                    | 693       | 147  | 20 | 146 149 |                          | 529       | 143  | 20 | 141 144 |                          | 278       | 133  | 19 | 130 135 |                          | -15                    | ***         | -10                    | ***         |
| Diastolic blood pressure (mmHg)                          |           |      |    |         |                          |           |      |    |         |                          |           |      |    |         |                          |                        |             |                        |             |
| Age class (years)                                        | 1998-2002 |      |    |         | ANOVA within period sign | 2008-2012 |      |    |         | ANOVA within period sign | 2018-2019 |      |    |         | ANOVA within period sign | 2018-2019 vs 1998-2002 |             | 2018-2019 vs 2008-2012 |             |
|                                                          | n         | mean | DS | 95% CI  |                          | n         | mean | DS | 95% CI  |                          | n         | mean | DS | 95% CI  |                          | Diff                   | t-test sign | Diff                   | t-test sign |
| 35-44                                                    | 715       | 78   | 10 | 77 78   | ***                      | 514       | 75   | 9  | 74 75   | ***                      | 237       | 70   | 10 | 68 71   | ***                      | -8                     | ***         | -5                     | ***         |
| 45-54                                                    | 769       | 83   | 11 | 82 83   |                          | 577       | 79   | 9  | 78 79   |                          | 271       | 74   | 11 | 72 75   |                          | -9                     | ***         | -5                     | ***         |
| 55-64                                                    | 778       | 85   | 10 | 84 85   |                          | 584       | 81   | 10 | 80 82   |                          | 280       | 74   | 11 | 73 76   |                          | -10                    | ***         | -7                     | ***         |
| 65-74                                                    | 693       | 85   | 10 | 84 85   |                          | 529       | 81   | 10 | 80 82   |                          | 278       | 74   | 11 | 72 75   |                          | -11                    | ***         | -7                     | ***         |
| Systolic blood pressure not under drug treatment (mmHg)  |           |      |    |         |                          |           |      |    |         |                          |           |      |    |         |                          |                        |             |                        |             |
| Age class (years)                                        | 1998-2002 |      |    |         | ANOVA within period sign | 2008-2012 |      |    |         | ANOVA within period sign | 2018-2019 |      |    |         | ANOVA within period sign | 2018-2019 vs 1998-2002 |             | 2018-2019 vs 2008-2012 |             |
|                                                          | n         | mean | DS | 95% CI  |                          | n         | mean | DS | 95% CI  |                          | n         | mean | DS | 95% CI  |                          | Diff                   | t-test sign | Diff                   | t-test sign |
| 35-44                                                    | 698       | 118  | 14 | 116 119 | ***                      | 499       | 114  | 12 | 113 115 | ***                      | 234       | 112  | 13 | 111 114 | ***                      | -5                     | ***         | -1                     | ns          |
| 45-54                                                    | 657       | 125  | 17 | 124 126 |                          | 510       | 120  | 15 | 119 122 |                          | 238       | 118  | 15 | 116 120 |                          | -7                     | ***         | -2                     | *           |
| 55-64                                                    | 539       | 134  | 18 | 132 135 |                          | 401       | 128  | 17 | 126 130 |                          | 203       | 123  | 17 | 121 126 |                          | -10                    | ***         | -4                     | **          |
| 65-74                                                    | 374       | 142  | 18 | 140 144 |                          | 244       | 138  | 20 | 135 140 |                          | 122       | 127  | 16 | 124 130 |                          | -15                    | ***         | -10                    | ***         |
| Diastolic blood pressure not under drug treatment (mmHg) |           |      |    |         |                          |           |      |    |         |                          |           |      |    |         |                          |                        |             |                        |             |
| Age class (years)                                        | 1998-2002 |      |    |         | ANOVA within period sign | 2008-2012 |      |    |         | ANOVA within period sign | 2018-2019 |      |    |         | ANOVA within period sign | 2018-2019 vs 1998-2002 |             | 2018-2019 vs 2008-2012 |             |
|                                                          | n         | mean | DS | 95% CI  |                          | n         | mean | DS | 95% CI  |                          | n         | mean | DS | 95% CI  |                          | Diff                   | t-test sign | Diff                   | t-test sign |
| 35-44                                                    | 698       | 77   | 10 | 76 78   | ***                      | 499       | 74   | 8  | 74 75   | ***                      | 234       | 70   | 10 | 68 71   | **                       | -8                     | ***         | -5                     | ***         |
| 45-54                                                    | 657       | 81   | 10 | 81 82   |                          | 510       | 78   | 9  | 77 79   |                          | 238       | 73   | 11 | 71 74   |                          | -9                     | ***         | -5                     | ***         |
| 55-64                                                    | 539       | 83   | 10 | 82 83   |                          | 401       | 79   | 9  | 79 80   |                          | 203       | 73   | 11 | 72 75   |                          | -9                     | ***         | -6                     | ***         |
| 65-74                                                    | 374       | 83   | 9  | 82 83   |                          | 244       | 80   | 9  | 79 81   |                          | 122       | 71   | 9  | 70 73   |                          | -11                    | ***         | -9                     | ***         |
| Heart rate (beats per minute)                            |           |      |    |         |                          |           |      |    |         |                          |           |      |    |         |                          |                        |             |                        |             |
| Age class (years)                                        | 1998-2002 |      |    |         | ANOVA within period sign | 2008-2012 |      |    |         | ANOVA within period sign | 2018-2019 |      |    |         | ANOVA within period sign | 2018-2019 vs 1998-2002 |             | 2018-2019 vs 2008-2012 |             |
|                                                          | n         | mean | DS | 95% CI  |                          | n         | mean | DS | 95% CI  |                          | n         | mean | DS | 95% CI  |                          | Diff                   | t-test sign | Diff                   | t-test sign |
| 35-44                                                    | 711       | 71   | 11 | 70 72   | **                       | 514       | 72   | 9  | 71 72   | ns                       | 237       | 74   | 11 | 73 75   | ns                       | 3                      | **          | 2                      | **          |
| 45-54                                                    | 769       | 70   | 10 | 69 71   |                          | 577       | 71   | 9  | 70 71   |                          | 271       | 73   | 10 | 72 74   |                          | 3                      | ***         | 3                      | **          |
| 55-64                                                    | 776       | 69   | 10 | 68 70   |                          | 584       | 71   | 9  | 70 72   |                          | 280       | 72   | 10 | 71 73   |                          | 3                      | ***         | 1                      | ns          |
| 65-74                                                    | 690       | 69   | 11 | 68 70   |                          | 529       | 71   | 10 | 70 72   |                          | 278       | 72   | 11 | 71 73   |                          | 3                      | **          | 1                      | ns          |

SD: standard deviation; CI: confidence interval. Diff: mean difference between 2018–2019 and 1998–2002 or 2018–2019 and 2008–2012; the values are approximated taking into account the first decimal of means. ANOVA: Analysis of Variance to compare variables among age classes within periods. t-test to compare variables between periods. \*\*\* p-value<0.0001; \*\* p-value<0.01; \*p-value<0.05; ns not significant p-value. Pool of the following Italian Regions: Piedmont, Lombardy, Liguria, Emilia Romagna, Tuscany, Lazio, Abruzzo, Basilicata, Calabria, and Sicily.

**Table S4. Blood pressure measurements and heart rate mean levels by educational level and period. Italian resident men aged 35–74 years, the CUORE Project Surveys 1998–2002, 2008–2012 and 2018–2019.**

| MEN                                                      |           |            |    |         |                                           |           |            |    |         |                                           |           |            |    |         |                                           |           |      |           |        |
|----------------------------------------------------------|-----------|------------|----|---------|-------------------------------------------|-----------|------------|----|---------|-------------------------------------------|-----------|------------|----|---------|-------------------------------------------|-----------|------|-----------|--------|
| Systolic blood pressure (mmHg)                           |           |            |    |         |                                           |           |            |    |         |                                           |           |            |    |         |                                           |           |      |           |        |
| Educational level                                        | 1998-2002 |            |    |         | ANOVA within period<br><i>sign</i><br>*** | 2008-2012 |            |    |         | ANOVA within period<br><i>sign</i><br>*** | 2018-2019 |            |    |         | ANOVA within period<br><i>sign</i><br>*** | 2018-2019 |      | 2018-2019 |        |
|                                                          | n         | mean       | DS | 95% CI  |                                           | n         | mean       | DS | 95% CI  |                                           | n         | mean       | DS | 95% CI  |                                           | n         | mean | DS        | 95% CI |
| Higher education                                         | 1249      | <b>135</b> | 17 | 134 136 |                                           | 1183      | <b>130</b> | 15 | 129 131 |                                           | 725       | <b>131</b> | 14 | 130 132 |                                           | -4        | ***  | 1         | ns     |
| Lower education                                          | 1730      | <b>136</b> | 18 | 135 137 |                                           | 1018      | <b>133</b> | 17 | 132 134 |                                           | 303       | <b>134</b> | 16 | 132 135 |                                           | -3        | **   | 0.2       | ns     |
| Diastolic blood pressure (mmHg)                          |           |            |    |         |                                           |           |            |    |         |                                           |           |            |    |         |                                           |           |      |           |        |
| Educational level                                        | 1998-2002 |            |    |         | ANOVA within period<br><i>sign</i><br>ns  | 2008-2012 |            |    |         | ANOVA within period<br><i>sign</i><br>ns  | 2018-2019 |            |    |         | ANOVA within period<br><i>sign</i><br>ns  | 2018-2019 |      | 2018-2019 |        |
|                                                          | n         | mean       | DS | 95% CI  |                                           | n         | mean       | DS | 95% CI  |                                           | n         | mean       | DS | 95% CI  |                                           | n         | mean | DS        | 95% CI |
| Higher education                                         | 1249      | <b>87</b>  | 11 | 86 87   |                                           | 1183      | <b>83</b>  | 10 | 83 84   |                                           | 725       | <b>77</b>  | 10 | 77 78   |                                           | -9        | ***  | -6        | ***    |
| Lower education                                          | 1730      | <b>86</b>  | 11 | 86 87   |                                           | 1018      | <b>84</b>  | 10 | 83 85   |                                           | 303       | <b>78</b>  | 10 | 77 79   |                                           | -8        | ***  | -6        | ***    |
| Systolic blood pressure not under drug treatment (mmHg)  |           |            |    |         |                                           |           |            |    |         |                                           |           |            |    |         |                                           |           |      |           |        |
| Educational level                                        | 1998-2002 |            |    |         | ANOVA within period<br><i>sign</i><br>*** | 2008-2012 |            |    |         | ANOVA within period<br><i>sign</i><br>*** | 2018-2019 |            |    |         | ANOVA within period<br><i>sign</i><br>*** | 2018-2019 |      | 2018-2019 |        |
|                                                          | n         | mean       | DS | 95% CI  |                                           | n         | mean       | DS | 95% CI  |                                           | n         | mean       | DS | 95% CI  |                                           | n         | mean | DS        | 95% CI |
| Higher education                                         | 1046      | <b>133</b> | 16 | 132 134 |                                           | 913       | <b>129</b> | 15 | 128 130 |                                           | 537       | <b>130</b> | 13 | 129 131 |                                           | -3        | ***  | 1         | ns     |
| Lower education                                          | 1305      | <b>134</b> | 17 | 133 135 |                                           | 680       | <b>131</b> | 16 | 130 133 |                                           | 205       | <b>133</b> | 15 | 131 135 |                                           | -1        | ns   | 1         | ns     |
| Diastolic blood pressure not under drug treatment (mmHg) |           |            |    |         |                                           |           |            |    |         |                                           |           |            |    |         |                                           |           |      |           |        |
| Educational level                                        | 1998-2002 |            |    |         | ANOVA within period<br><i>sign</i><br>ns  | 2008-2012 |            |    |         | ANOVA within period<br><i>sign</i><br>ns  | 2018-2019 |            |    |         | ANOVA within period<br><i>sign</i><br>ns  | 2018-2019 |      | 2018-2019 |        |
|                                                          | n         | mean       | DS | 95% CI  |                                           | n         | mean       | DS | 95% CI  |                                           | n         | mean       | DS | 95% CI  |                                           | n         | mean | DS        | 95% CI |
| Higher education                                         | 1046      | <b>86</b>  | 10 | 85 86   |                                           | 913       | <b>83</b>  | 10 | 82 83   |                                           | 537       | <b>77</b>  | 10 | 76 78   |                                           | -9        | ***  | -6        | ***    |
| Lower education                                          | 1305      | <b>85</b>  | 10 | 85 86   |                                           | 680       | <b>83</b>  | 10 | 83 84   |                                           | 205       | <b>77</b>  | 9  | 76 78   |                                           | -8        | ***  | -6        | ***    |
| Heart rate (beats per minute)                            |           |            |    |         |                                           |           |            |    |         |                                           |           |            |    |         |                                           |           |      |           |        |
| Educational level                                        | 1998-2002 |            |    |         | ANOVA within period<br><i>sign</i><br>ns  | 2008-2012 |            |    |         | ANOVA within period<br><i>sign</i><br>ns  | 2018-2019 |            |    |         | ANOVA within period<br><i>sign</i><br>**  | 2018-2019 |      | 2018-2019 |        |
|                                                          | n         | mean       | DS | 95% CI  |                                           | n         | mean       | DS | 95% CI  |                                           | n         | mean       | DS | 95% CI  |                                           | n         | mean | DS        | 95% CI |
| Higher education                                         | 1244      | <b>66</b>  | 11 | 65 67   |                                           | 1183      | <b>68</b>  | 9  | 68 69   |                                           | 725       | <b>71</b>  | 11 | 70 72   |                                           | 5         | ***  | 2         | ***    |
| Lower education                                          | 1730      | <b>66</b>  | 11 | 65 67   |                                           | 1018      | <b>68</b>  | 10 | 68 69   |                                           | 303       | <b>74</b>  | 12 | 73 76   |                                           | 8         | ***  | 6         | ***    |

Means and standard deviations age-standardized by ISTAT Italian population 2000, 2010 and 2019 respectively. SD: standard deviation; CI: confidence interval. Diff: mean difference between 2018–2019 and 1998–2002 or 2018–2019 and 2008–2012; the values are approximated taking into account the first decimal of means. Higher education - high school or college; lower education - primary or middle school. ANOVA: Analysis of Variance to compare variables among age classes within periods. t-test to compare variables between periods. \*\*\* p-value<0.0001; \*\* p-value<0.01; \*p-value<0.05; ns not significant p-value. Pool of the following Italian Regions: Piedmont, Lombardy, Liguria, Emilia Romagna, Tuscany, Lazio, Abruzzo, Basilicata, Calabria, and Sicily.

**Table S5. Blood pressure measurements and heart rate mean levels by educational level and period. Italian resident women aged 35–74 years, the CUORE Project Surveys 1998-2002, 2008-2012 and 2018-2019.**

| WOMEN                                                    |           |      |     |         |                          |           |      |     |         |                          |           |      |     |         |                          |           |             |           |             |
|----------------------------------------------------------|-----------|------|-----|---------|--------------------------|-----------|------|-----|---------|--------------------------|-----------|------|-----|---------|--------------------------|-----------|-------------|-----------|-------------|
| Systolic blood pressure (mmHg)                           |           |      |     |         |                          |           |      |     |         |                          |           |      |     |         |                          |           |             |           |             |
| Educational level                                        | 1998-2002 |      |     |         | ANOVA within period sign | 2008-2012 |      |     |         | ANOVA within period sign | 2018-2019 |      |     |         | ANOVA within period sign | 2018-2019 |             | 2018-2019 |             |
|                                                          | n         | mean | std | 95% CI  |                          | n         | mean | std | 95% CI  |                          | n         | mean | std | 95% CI  |                          | Diff      | t-test sign | Diff      | t-test sign |
| Higher education                                         | 1052      | 130  | 16  | 129 131 | ***                      | 1167      | 124  | 15  | 123 124 | ***                      | 725       | 120  | 15  | 119 122 | ***                      | -9        | ***         | -3        | ***         |
| Lower education                                          | 1887      | 133  | 18  | 132 134 |                          | 1017      | 129  | 18  | 128 130 |                          | 339       | 126  | 17  | 124 127 |                          | -7        | ***         | -4        | **          |
| Diastolic blood pressure (mmHg)                          |           |      |     |         |                          |           |      |     |         |                          |           |      |     |         |                          |           |             |           |             |
| Educational level                                        | 1998-2002 |      |     |         | ANOVA within period sign | 2008-2012 |      |     |         | ANOVA within period sign | 2018-2019 |      |     |         | ANOVA within period sign | 2018-2019 |             | 2018-2019 |             |
|                                                          | n         | mean | std | 95% CI  |                          | n         | mean | std | 95% CI  |                          | n         | mean | std | 95% CI  |                          | Diff      | t-test sign | Diff      | t-test sign |
| Higher education                                         | 1052      | 81   | 10  | 81 82   | ***                      | 1167      | 78   | 9   | 77 78   | ***                      | 725       | 72   | 11  | 72 73   | **                       | -9        | ***         | -5        | ***         |
| Lower education                                          | 1887      | 83   | 10  | 82 83   |                          | 1017      | 79   | 10  | 79 80   |                          | 339       | 74   | 10  | 73 75   |                          | -8        | ***         | -5        | ***         |
| Systolic blood pressure not under drug treatment (mmHg)  |           |      |     |         |                          |           |      |     |         |                          |           |      |     |         |                          |           |             |           |             |
| Educational level                                        | 1998-2002 |      |     |         | ANOVA within period sign | 2008-2012 |      |     |         | ANOVA within period sign | 2018-2019 |      |     |         | ANOVA within period sign | 2018-2019 |             | 2018-2019 |             |
|                                                          | n         | mean | std | 95% CI  |                          | n         | mean | std | 95% CI  |                          | n         | mean | std | 95% CI  |                          | Diff      | t-test sign | Diff      | t-test sign |
| Higher education                                         | 928       | 128  | 16  | 127 129 | ***                      | 992       | 121  | 14  | 120 122 | ***                      | 593       | 119  | 15  | 118 120 | ***                      | -9        | ***         | -2        | **          |
| Lower education                                          | 1331      | 129  | 16  | 129 130 |                          | 651       | 127  | 16  | 126 128 |                          | 203       | 124  | 16  | 121 126 |                          | -6        | ***         | -3        | *           |
| Diastolic blood pressure not under drug treatment (mmHg) |           |      |     |         |                          |           |      |     |         |                          |           |      |     |         |                          |           |             |           |             |
| Educational level                                        | 1998-2002 |      |     |         | ANOVA within period sign | 2008-2012 |      |     |         | ANOVA within period sign | 2018-2019 |      |     |         | ANOVA within period sign | 2018-2019 |             | 2018-2019 |             |
|                                                          | n         | mean | std | 95% CI  |                          | n         | mean | std | 95% CI  |                          | n         | mean | std | 95% CI  |                          | Diff      | t-test sign | Diff      | t-test sign |
| Higher education                                         | 928       | 81   | 10  | 80 81   | ***                      | 992       | 77   | 9   | 76 78   | ***                      | 593       | 71   | 10  | 71 72   | *                        | -9        | ***         | -6        | ***         |
| Lower education                                          | 1331      | 81   | 10  | 81 82   |                          | 651       | 78   | 9   | 78 79   |                          | 203       | 73   | 10  | 72 75   |                          | -8        | ***         | -5        | ***         |
| Heart rate (beats per minute)                            |           |      |     |         |                          |           |      |     |         |                          |           |      |     |         |                          |           |             |           |             |
| Educational level                                        | 1998-2002 |      |     |         | ANOVA within period sign | 2008-2012 |      |     |         | ANOVA within period sign | 2018-2019 |      |     |         | ANOVA within period sign | 2018-2019 |             | 2018-2019 |             |
|                                                          | n         | mean | std | 95% CI  |                          | n         | mean | std | 95% CI  |                          | n         | mean | std | 95% CI  |                          | Diff      | t-test sign | Diff      | t-test sign |
| Higher education                                         | 1047      | 69   | 11  | 69 70   | ns                       | 1167      | 71   | 9   | 70 72   | ns                       | 725       | 73   | 10  | 72 73   | ns                       | 3         | ***         | 2         | **          |
| Lower education                                          | 1884      | 70   | 11  | 69 70   |                          | 1017      | 71   | 10  | 71 72   |                          | 339       | 73   | 11  | 72 74   |                          | 3         | ***         | 2         | **          |

Means and standard deviations age-standardized by ISTAT Italian population 2000, 2010 and 2019 respectively. SD: standard deviation; CI: confidence interval. Diff: mean difference between 2018–2019 and 1998–2002 or 2018–2019 and 2008–2012; the values are approximated taking into account the first decimal of means. Higher education - high school or college; lower education - primary or middle school. ANOVA: Analysis of Variance to compare variables among age classes within periods. t-test to compare variables between periods. \*\*\* p-value<0.0001; \*\* p-value<0.01; \*p-value<0.05; ns not significant p-value. Pool of the following Italian Regions: Lombardy, Piedmont, Liguria, Emilia Romagna, Tuscany, Lazio, Abruzzo, Basilicata, Calabria, and Sicily.



**Table S6. Prevalence of blood pressure treatment, raised blood pressure, hypertension and state of hypertension control based on measurements, by age class and period. Italian resident men aged 35–74 years, the CUORE Project Surveys 1998–2002, 2008–2012 and 2018–2019.**

| MEN                                  |           |    |        |                                     |           |    |        |                                     |           |    |        |                                     |                        |                  |                        |                  |
|--------------------------------------|-----------|----|--------|-------------------------------------|-----------|----|--------|-------------------------------------|-----------|----|--------|-------------------------------------|------------------------|------------------|------------------------|------------------|
| Blood pressure drug treatment        |           |    |        |                                     |           |    |        |                                     |           |    |        |                                     |                        |                  |                        |                  |
| Age class (years)                    | 1998–2002 |    |        | Chi-squared test within period sign | 2008–2012 |    |        | Chi-squared test within period sign | 2018–2019 |    |        | Chi-squared test within period sign | 2018–2019 vs 1998–2002 |                  | 2018–2019 vs 2008–2012 |                  |
|                                      | n         | %  | 95% CI |                                     | n         | %  | 95% CI |                                     | n         | %  | 95% CI |                                     | Diff                   | chi-squared sign | Diff                   | chi-squared sign |
|                                      |           |    |        |                                     |           |    |        |                                     |           |    |        |                                     |                        |                  |                        |                  |
| 35–44                                | 717       | 5  | 3 6    | ***                                 | 530       | 5  | 3 7    | ***                                 | 248       | 4  | 2 7    | ***                                 | -0.4                   | ns               | -0.5                   | ns               |
| 45–54                                | 752       | 15 | 12 17  |                                     | 588       | 18 | 15 21  |                                     | 248       | 15 | 10 19  |                                     | -0.4                   | ns               | -4                     | ns               |
| 55–64                                | 784       | 26 | 23 29  |                                     | 564       | 34 | 30 38  |                                     | 277       | 39 | 33 44  |                                     | 13                     | ***              | 4                      | ns               |
| 65–74                                | 732       | 38 | 34 41  |                                     | 536       | 53 | 49 57  |                                     | 258       | 52 | 45 58  |                                     | 14                     | **               | -1                     | ns               |
| Raised blood pressure                |           |    |        |                                     |           |    |        |                                     |           |    |        |                                     |                        |                  |                        |                  |
| Age class (years)                    | 1998–2002 |    |        | Chi-squared test within period sign | 2008–2012 |    |        | Chi-squared test within period sign | 2018–2019 |    |        | Chi-squared test within period sign | 2018–2019 vs 1998–2002 |                  | 2018–2019 vs 2008–2012 |                  |
|                                      | n         | %  | 95% CI |                                     | n         | %  | 95% CI |                                     | n         | %  | 95% CI |                                     | Diff                   | chi-squared sign | Diff                   | chi-squared sign |
|                                      |           |    |        |                                     |           |    |        |                                     |           |    |        |                                     |                        |                  |                        |                  |
| 35–44                                | 717       | 33 | 30 37  | ***                                 | 530       | 26 | 22 29  | ***                                 | 248       | 19 | 14 23  | ***                                 | -15                    | ***              | -7                     | *                |
| 45–54                                | 752       | 46 | 43 50  |                                     | 588       | 40 | 36 44  |                                     | 248       | 26 | 20 31  |                                     | -21                    | ***              | -14                    | ***              |
| 55–64                                | 784       | 59 | 56 63  |                                     | 564       | 46 | 41 50  |                                     | 277       | 35 | 29 40  |                                     | -25                    | ***              | -11                    | **               |
| 65–74                                | 732       | 70 | 67 73  |                                     | 536       | 55 | 51 60  |                                     | 258       | 43 | 37 49  |                                     | -27                    | ***              | -12                    | **               |
| Hypertension                         |           |    |        |                                     |           |    |        |                                     |           |    |        |                                     |                        |                  |                        |                  |
| Age class (years)                    | 1998–2002 |    |        | Chi-squared test within period sign | 2008–2012 |    |        | Chi-squared test within period sign | 2018–2019 |    |        | Chi-squared test within period sign | 2018–2019 vs 1998–2002 |                  | 2018–2019 vs 2008–2012 |                  |
|                                      | n         | %  | 95% CI |                                     | n         | %  | 95% CI |                                     | n         | %  | 95% CI |                                     | Diff                   | chi-squared sign | Diff                   | chi-squared sign |
|                                      |           |    |        |                                     |           |    |        |                                     |           |    |        |                                     |                        |                  |                        |                  |
| 35–44                                | 717       | 35 | 31 38  | ***                                 | 530       | 28 | 24 32  | ***                                 | 248       | 21 | 16 26  | **                                  | -14                    | ***              | -7                     | *                |
| 45–54                                | 752       | 51 | 47 54  |                                     | 588       | 46 | 42 50  |                                     | 248       | 32 | 26 38  |                                     | -19                    | ***              | -14                    | **               |
| 55–64                                | 784       | 64 | 61 68  |                                     | 564       | 62 | 58 66  |                                     | 277       | 58 | 53 64  |                                     | -6                     | ns               | -3                     | ns               |
| 65–74                                | 732       | 76 | 72 79  |                                     | 536       | 76 | 72 80  |                                     | 258       | 74 | 69 79  |                                     | -2                     | ns               | -2                     | ns               |
| Undiagnosed hypertension             |           |    |        |                                     |           |    |        |                                     |           |    |        |                                     |                        |                  |                        |                  |
| Age class (years)                    | 1998–2002 |    |        | Chi-squared test within period sign | 2008–2012 |    |        | Chi-squared test within period sign | 2018–2019 |    |        | Chi-squared test within period sign | 2018–2019 vs 1998–2002 |                  | 2018–2019 vs 2008–2012 |                  |
|                                      | n         | %  | 95% CI |                                     | n         | %  | 95% CI |                                     | n         | %  | 95% CI |                                     | Diff                   | chi-squared sign | Diff                   | chi-squared sign |
|                                      |           |    |        |                                     |           |    |        |                                     |           |    |        |                                     |                        |                  |                        |                  |
| 35–44                                | 249       | 67 | 62 73  | **                                  | 149       | 54 | 46 62  | ***                                 | 52        | 62 | 48 75  | ***                                 | -6                     | ns               | 8                      | ns               |
| 45–54                                | 380       | 52 | 47 57  |                                     | 269       | 40 | 34 46  |                                     | 79        | 35 | 25 46  |                                     | -16                    | **               | -4                     | ns               |
| 55–64                                | 505       | 48 | 44 52  |                                     | 349       | 32 | 27 37  |                                     | 162       | 23 | 17 30  |                                     | -25                    | ***              | -8                     | ns               |
| 65–74                                | 553       | 39 | 35 43  |                                     | 407       | 25 | 20 29  |                                     | 191       | 21 | 16 27  |                                     | -18                    | ***              | -3                     | ns               |
| Diagnosed but untreated hypertension |           |    |        |                                     |           |    |        |                                     |           |    |        |                                     |                        |                  |                        |                  |
| Age class (years)                    | 1998–2002 |    |        | Chi-squared test within period sign | 2008–2012 |    |        | Chi-squared test within period sign | 2018–2019 |    |        | Chi-squared test within period sign | 2018–2019 vs 1998–2002 |                  | 2018–2019 vs 2008–2012 |                  |
|                                      | n         | %  | 95% CI |                                     | n         | %  | 95% CI |                                     | n         | %  | 95% CI |                                     | Diff                   | chi-squared sign | Diff                   | chi-squared sign |
|                                      |           |    |        |                                     |           |    |        |                                     |           |    |        |                                     |                        |                  |                        |                  |
| 35–44                                | 249       | 18 | 14 23  | ***                                 | 149       | 29 | 22 36  | ***                                 | 52        | 17 | 7 28   | ns                                  | -1                     | ns               | -12                    | ns               |
| 45–54                                | 380       | 19 | 15 23  |                                     | 269       | 20 | 16 25  |                                     | 79        | 19 | 10 28  |                                     | 0.0                    | ns               | -1                     | ns               |
| 55–64                                | 505       | 12 | 9 14   |                                     | 349       | 13 | 9 16   |                                     | 162       | 10 | 6 15   |                                     | -1                     | ns               | -2                     | ns               |
| 65–74                                | 553       | 10 | 8 13   |                                     | 407       | 6  | 3 8    |                                     | 191       | 9  | 5 13   |                                     | -1                     | ns               | 3                      | ns               |
| Uncontrolled hypertension            |           |    |        |                                     |           |    |        |                                     |           |    |        |                                     |                        |                  |                        |                  |
| Age class (years)                    | 1998–2002 |    |        | Chi-squared test within period sign | 2008–2012 |    |        | Chi-squared test within period sign | 2018–2019 |    |        | Chi-squared test within period sign | 2018–2019 vs 1998–2002 |                  | 2018–2019 vs 2008–2012 |                  |
|                                      | n         | %  | 95% CI |                                     | n         | %  | 95% CI |                                     | n         | %  | 95% CI |                                     | Diff                   | chi-squared sign | Diff                   | chi-squared sign |
|                                      |           |    |        |                                     |           |    |        |                                     |           |    |        |                                     |                        |                  |                        |                  |
| 35–44                                | 249       | 10 | 7 14   | ***                                 | 149       | 9  | 4 13   | ***                                 | 52        | 10 | 2 18   | ns                                  | -1                     | ns               | 1                      | ns               |
| 45–54                                | 380       | 21 | 17 25  |                                     | 269       | 27 | 22 32  |                                     | 79        | 27 | 17 36  |                                     | 5                      | ns               | -1                     | ns               |
| 55–64                                | 505       | 32 | 28 37  |                                     | 349       | 29 | 24 34  |                                     | 162       | 25 | 19 32  |                                     | -7                     | ns               | -4                     | ns               |
| 65–74                                | 553       | 43 | 39 47  |                                     | 407       | 43 | 38 48  |                                     | 191       | 28 | 22 35  |                                     | -15                    | **               | -14                    | **               |
| Controlled hypertension              |           |    |        |                                     |           |    |        |                                     |           |    |        |                                     |                        |                  |                        |                  |
| Age class (years)                    | 1998–2002 |    |        | Chi-squared test within period sign | 2008–2012 |    |        | Chi-squared test within period sign | 2018–2019 |    |        | Chi-squared test within period sign | 2018–2019 vs 1998–2002 |                  | 2018–2019 vs 2008–2012 |                  |
|                                      | n         | %  | 95% CI |                                     | n         | %  | 95% CI |                                     | n         | %  | 95% CI |                                     | Diff                   | chi-squared sign | Diff                   | chi-squared sign |
|                                      |           |    |        |                                     |           |    |        |                                     |           |    |        |                                     |                        |                  |                        |                  |
| 35–44                                | 249       | 4  | 1 6    | ns                                  | 149       | 9  | 4 13   | ***                                 | 52        | 12 | 3 20   | ***                                 | 8                      | *                | 3                      | ns               |
| 45–54                                | 380       | 8  | 5 11   |                                     | 269       | 13 | 9 17   |                                     | 79        | 19 | 10 28  |                                     | 11                     | **               | 6                      | ns               |
| 55–64                                | 505       | 8  | 5 10   |                                     | 349       | 26 | 22 31  |                                     | 162       | 41 | 33 48  |                                     | 33                     | ***              | 14                     | **               |
| 65–74                                | 553       | 7  | 5 9    |                                     | 407       | 27 | 23 31  |                                     | 191       | 41 | 34 48  |                                     | 34                     | ***              | 14                     | **               |

CI: confidence interval. Diff: prevalence difference between 2018–2019 and 1998–2002 or 2018–2019 and 2008–2012; the values are approximated taking into account the first decimal of prevalence. Chi-squared test to compare prevalences between periods and among age classes within the period. Raised blood pressure: systolic blood pressure  $\geq 140$  mmHg and/or diastolic blood pressure  $\geq 90$  mmHg. Hypertension: systolic blood pressure  $\geq 140$  mmHg and/or diastolic blood pressure  $\geq 90$  mmHg and/or under specific pharmacological treatment. Hypertension is divided into 'undiagnosed', 'diagnosed but untreated', 'uncontrolled' (treated and SBP  $\geq 140$  mmHg or DBP  $\geq 90$  mmHg) and 'controlled' (treated and SBP  $< 140$  mmHg and DBP  $< 90$  mmHg). Pool of the following Italian Regions: Piedmont, Lombardy, Liguria, Emilia Romagna, Tuscany, Lazio, Abruzzo, Basilicata, Calabria, and Sicily.

**Table S7. Prevalence of blood pressure treatment, raised blood pressure, hypertension and state of hypertension control based on measurements, by age class and period. Italian resident women aged 35–74 years, the CUORE Project Surveys 1998-2002, 2008-2012 and 2018-2019.**

| WOMEN                                |           |    |        |                                            |           |    |        |                                            |           |    |        |                        |                  |                        |                  |
|--------------------------------------|-----------|----|--------|--------------------------------------------|-----------|----|--------|--------------------------------------------|-----------|----|--------|------------------------|------------------|------------------------|------------------|
| Blood pressure drug treatment        |           |    |        |                                            |           |    |        |                                            |           |    |        |                        |                  |                        |                  |
| Age class (years)                    | 1998-2002 |    |        | Chi-squared test within period sign<br>*** | 2008-2012 |    |        | Chi-squared test within period sign<br>*** | 2018-2019 |    |        | 2018-2019 vs 1998-2002 |                  | 2018-2019 vs 2008-2012 |                  |
|                                      | n         | %  | 95% CI |                                            | n         | %  | 95% CI |                                            | n         | %  | 95% CI | Diff                   | chi-squared sign | Diff                   | chi-squared sign |
| 35-44                                | 715       | 2  | 1 3    |                                            | 514       | 3  | 1 4    |                                            | 237       | 1  | 0 3    | -1                     | ns               | -2                     | ns               |
| 45-54                                | 769       | 15 | 12 17  |                                            | 577       | 12 | 9 14   |                                            | 271       | 12 | 8 16   | -2                     | ns               | 1                      | ns               |
| 55-64                                | 778       | 31 | 27 34  |                                            | 584       | 31 | 28 35  |                                            | 280       | 28 | 22 33  | -3                     | ns               | -4                     | ns               |
| 65-74                                | 693       | 46 | 42 50  |                                            | 529       | 54 | 50 58  |                                            | 278       | 56 | 50 62  | 10                     | **               | 2                      | ns               |
| Raised blood pressure                |           |    |        |                                            |           |    |        |                                            |           |    |        |                        |                  |                        |                  |
| Age class (years)                    | 1998-2002 |    |        | Chi-squared test within period sign<br>*** | 2008-2012 |    |        | Chi-squared test within period sign<br>*** | 2018-2019 |    |        | 2018-2019 vs 1998-2002 |                  | 2018-2019 vs 2008-2012 |                  |
|                                      | n         | %  | 95% CI |                                            | n         | %  | 95% CI |                                            | n         | %  | 95% CI | Diff                   | chi-squared sign | Diff                   | chi-squared sign |
| 35-44                                | 715       | 15 | 12 17  |                                            | 514       | 6  | 4 9    |                                            | 237       | 5  | 2 8    | -9                     | **               | -1                     | ns               |
| 45-54                                | 769       | 33 | 30 37  |                                            | 577       | 18 | 15 21  |                                            | 271       | 13 | 9 16   | -21                    | ***              | -5                     | *                |
| 55-64                                | 778       | 50 | 47 54  |                                            | 584       | 34 | 30 38  |                                            | 280       | 20 | 15 25  | -30                    | ***              | -14                    | ***              |
| 65-74                                | 693       | 68 | 65 72  |                                            | 529       | 54 | 50 58  |                                            | 278       | 31 | 25 36  | -38                    | ***              | -23                    | ***              |
| Hypertension                         |           |    |        |                                            |           |    |        |                                            |           |    |        |                        |                  |                        |                  |
| Age class (years)                    | 1998-2002 |    |        | Chi-squared test within period sign<br>*** | 2008-2012 |    |        | Chi-squared test within period sign<br>*** | 2018-2019 |    |        | 2018-2019 vs 1998-2002 |                  | 2018-2019 vs 2008-2012 |                  |
|                                      | n         | %  | 95% CI |                                            | n         | %  | 95% CI |                                            | n         | %  | 95% CI | Diff                   | chi-squared sign | Diff                   | chi-squared sign |
| 35-44                                | 715       | 15 | 13 18  |                                            | 514       | 8  | 6 11   |                                            | 237       | 6  | 3 9    | -9                     | **               | -2                     | ns               |
| 45-54                                | 769       | 38 | 35 41  |                                            | 577       | 25 | 21 28  |                                            | 271       | 21 | 17 26  | -17                    | ***              | -4                     | ns               |
| 55-64                                | 778       | 58 | 55 61  |                                            | 584       | 49 | 45 53  |                                            | 280       | 40 | 35 46  | -18                    | ***              | -8                     | *                |
| 65-74                                | 693       | 77 | 74 80  |                                            | 529       | 73 | 69 76  |                                            | 278       | 64 | 59 70  | -12                    | ***              | -8                     | *                |
| Undiagnosed hypertension             |           |    |        |                                            |           |    |        |                                            |           |    |        |                        |                  |                        |                  |
| Age class (years)                    | 1998-2002 |    |        | Chi-squared test within period sign<br>*** | 2008-2012 |    |        | Chi-squared test within period sign<br>*** | 2018-2019 |    |        | 2018-2019 vs 1998-2002 |                  | 2018-2019 vs 2008-2012 |                  |
|                                      | n         | %  | 95% CI |                                            | n         | %  | 95% CI |                                            | n         | %  | 95% CI | Diff                   | chi-squared sign | Diff                   | chi-squared sign |
| 35-44                                | 110       | 62 | 53 71  |                                            | 43        | 40 | 25 54  |                                            | 15        | 47 | 21 72  | -15                    | ns               | 7                      | ns               |
| 45-54                                | 292       | 45 | 40 51  |                                            | 144       | 39 | 31 47  |                                            | 58        | 29 | 18 41  | -16                    | *                | -10                    | ns               |
| 55-64                                | 451       | 33 | 29 38  |                                            | 285       | 24 | 19 28  |                                            | 113       | 21 | 14 29  | -12                    | *                | -2                     | ns               |
| 65-74                                | 532       | 32 | 28 36  |                                            | 384       | 20 | 16 23  |                                            | 179       | 11 | 6 15   | -22                    | ***              | -9                     | **               |
| Diagnosed but untreated hypertension |           |    |        |                                            |           |    |        |                                            |           |    |        |                        |                  |                        |                  |
| Age class (years)                    | 1998-2002 |    |        | Chi-squared test within period sign<br>*** | 2008-2012 |    |        | Chi-squared test within period sign<br>**  | 2018-2019 |    |        | 2018-2019 vs 1998-2002 |                  | 2018-2019 vs 2008-2012 |                  |
|                                      | n         | %  | 95% CI |                                            | n         | %  | 95% CI |                                            | n         | %  | 95% CI | Diff                   | chi-squared sign | Diff                   | chi-squared sign |
| 35-44                                | 110       | 23 | 15 31  |                                            | 43        | 26 | 13 39  |                                            | 15        | 33 | 9 57   | 11                     | ns               | 8                      | ns               |
| 45-54                                | 292       | 16 | 12 21  |                                            | 144       | 15 | 9 20   |                                            | 58        | 14 | 5 23   | -3                     | ns               | -1                     | ns               |
| 55-64                                | 451       | 14 | 10 17  |                                            | 285       | 12 | 8 16   |                                            | 113       | 11 | 5 16   | -3                     | ns               | -2                     | ns               |
| 65-74                                | 532       | 8  | 6 10   |                                            | 384       | 6  | 4 9    |                                            | 179       | 2  | 0 4    | -6                     | ***              | -4                     | ***              |
| Uncontrolled hypertension            |           |    |        |                                            |           |    |        |                                            |           |    |        |                        |                  |                        |                  |
| Age class (years)                    | 1998-2002 |    |        | Chi-squared test within period sign<br>*** | 2008-2012 |    |        | Chi-squared test within period sign<br>*** | 2018-2019 |    |        | 2018-2019 vs 1998-2002 |                  | 2018-2019 vs 2008-2012 |                  |
|                                      | n         | %  | 95% CI |                                            | n         | %  | 95% CI |                                            | n         | %  | 95% CI | Diff                   | chi-squared sign | Diff                   | chi-squared sign |
| 35-44                                | 110       | 10 | 4 16   |                                            | 43        | 12 | 2 21   |                                            | 15        | 0  | 0 0    | -10                    | -                | -12                    | -                |
| 45-54                                | 292       | 26 | 21 31  |                                            | 144       | 19 | 12 25  |                                            | 58        | 16 | 6 25   | -11                    | ns               | -3                     | ns               |
| 55-64                                | 451       | 39 | 35 44  |                                            | 285       | 33 | 28 39  |                                            | 113       | 18 | 11 25  | -22                    | ***              | -16                    | **               |
| 65-74                                | 532       | 49 | 45 53  |                                            | 384       | 48 | 43 53  |                                            | 179       | 35 | 28 42  | -14                    | ***              | -14                    | ***              |
| Controlled hypertension              |           |    |        |                                            |           |    |        |                                            |           |    |        |                        |                  |                        |                  |
| Age class (years)                    | 1998-2002 |    |        | Chi-squared test within period sign<br>ns  | 2008-2012 |    |        | Chi-squared test within period sign<br>ns  | 2018-2019 |    |        | 2018-2019 vs 1998-2002 |                  | 2018-2019 vs 2008-2012 |                  |
|                                      | n         | %  | 95% CI |                                            | n         | %  | 95% CI |                                            | n         | %  | 95% CI | Diff                   | chi-squared sign | Diff                   | chi-squared sign |
| 35-44                                | 110       | 5  | 1 10   |                                            | 43        | 23 | 11 36  |                                            | 15        | 20 | 0 40   | 15                     | *                | -3                     | ns               |
| 45-54                                | 292       | 12 | 8 16   |                                            | 144       | 28 | 20 35  |                                            | 58        | 41 | 29 54  | 29                     | ***              | 14                     | ns               |
| 55-64                                | 451       | 14 | 10 17  |                                            | 285       | 31 | 26 36  |                                            | 113       | 50 | 41 60  | 37                     | ***              | 20                     | **               |
| 65-74                                | 532       | 11 | 8 14   |                                            | 384       | 26 | 21 30  |                                            | 179       | 53 | 45 60  | 41                     | ***              | 27                     | *                |

CI: confidence interval. Diff: prevalence difference between 2018–2019 and 1998–2002 or 2018–2019 and 2008–2012; the values are approximated taking into account the first decimal of prevalence. Chi-squared test to compare prevalences between periods and among age classes within the period. Raised blood pressure: systolic blood pressure  $\geq 140$  mmHg and/or diastolic blood pressure  $\geq 90$  mmHg. Hypertension: systolic blood pressure  $\geq 140$  mmHg and/or diastolic blood pressure  $\geq 90$  mmHg and/or under specific pharmacological treatment. Hypertension is divided into 'undiagnosed', 'diagnosed but untreated', 'uncontrolled' (treated and SBP  $\geq 140$  mmHg or DBP  $\geq 90$  mmHg) and 'controlled' (treated and SBP  $< 140$  mmHg and DBP  $< 90$  mmHg). Pool of the following Italian Regions: Piedmont, Lombardy, Liguria, Emilia Romagna, Tuscany, Lazio, Abruzzo, Basilicata, Calabria, and Sicily.



**Table S8. Prevalence of blood pressure treatment, raised blood pressure, hypertension and state of hypertension control based on measurements, by educational class and period. Italian resident men aged 35–74 years, the CUORE Project Surveys 1998–2002, 2008–2012 and 2018–2019.**

|                   |           | MEN                                  |        |                                     |           |    |        |                                     |           |    |        |                                     |                        |                  |                        |                  |
|-------------------|-----------|--------------------------------------|--------|-------------------------------------|-----------|----|--------|-------------------------------------|-----------|----|--------|-------------------------------------|------------------------|------------------|------------------------|------------------|
|                   |           | Blood pressure drug treatment        |        |                                     |           |    |        |                                     |           |    |        |                                     |                        |                  |                        |                  |
| Educational level | 1998–2002 |                                      |        | Chi-squared test within period sign | 2008–2012 |    |        | Chi-squared test within period sign | 2018–2019 |    |        | Chi-squared test within period sign | 2018–2019 vs 1998–2002 |                  | 2018–2019 vs 2008–2012 |                  |
|                   | n         | %                                    | 95% CI |                                     | n         | %  | 95% CI |                                     | n         | %  | 95% CI |                                     | Diff                   | chi-squared sign | Diff                   | chi-squared sign |
| Higher education  | 1249      | 18                                   | 16 20  | ns                                  | 1183      | 24 | 22 27  | ns                                  | 725       | 26 | 23 29  | ns                                  | 8                      | ***              | 2                      | ns               |
| Lower education   | 1730      | 19                                   | 18 21  |                                     | 1018      | 25 | 22 28  |                                     | 303       | 24 | 19 29  |                                     | 5                      | ns               | -1                     | ns               |
|                   |           | Raised blood pressure                |        |                                     |           |    |        |                                     |           |    |        |                                     |                        |                  |                        |                  |
| Educational level | 1998–2002 |                                      |        | Chi-squared test within period sign | 2008–2012 |    |        | Chi-squared test within period sign | 2018–2019 |    |        | Chi-squared test within period sign | 2018–2019 vs 1998–2002 |                  | 2018–2019 vs 2008–2012 |                  |
|                   | n         | %                                    | 95% CI |                                     | n         | %  | 95% CI |                                     | n         | %  | 95% CI |                                     | Diff                   | chi-squared sign | Diff                   | chi-squared sign |
| Higher education  | 1249      | 48                                   | 45 51  | ns                                  | 1183      | 35 | 33 38  | **                                  | 725       | 28 | 25 31  | ns                                  | -20                    | ***              | -7                     | **               |
| Lower education   | 1730      | 51                                   | 49 54  |                                     | 1018      | 43 | 40 46  |                                     | 303       | 34 | 29 39  |                                     | -17                    | ***              | -9                     | **               |
|                   |           | Hypertension                         |        |                                     |           |    |        |                                     |           |    |        |                                     |                        |                  |                        |                  |
| Educational level | 1998–2002 |                                      |        | Chi-squared test within period sign | 2008–2012 |    |        | Chi-squared test within period sign | 2018–2019 |    |        | Chi-squared test within period sign | 2018–2019 vs 1998–2002 |                  | 2018–2019 vs 2008–2012 |                  |
|                   | n         | %                                    | 95% CI |                                     | n         | %  | 95% CI |                                     | n         | %  | 95% CI |                                     | Diff                   | chi-squared sign | Diff                   | chi-squared sign |
| Higher education  | 1249      | 51                                   | 49 54  | *                                   | 1183      | 48 | 45 51  | ns                                  | 725       | 43 | 40 47  | ns                                  | -8                     | **               | -4                     | ns               |
| Lower education   | 1730      | 55                                   | 53 58  |                                     | 1018      | 51 | 48 54  |                                     | 303       | 46 | 40 52  |                                     | -9                     | **               | -5                     | ns               |
|                   |           | Undiagnosed hypertension             |        |                                     |           |    |        |                                     |           |    |        |                                     |                        |                  |                        |                  |
| Educational level | 1998–2002 |                                      |        | Chi-squared test within period sign | 2008–2012 |    |        | Chi-squared test within period sign | 2018–2019 |    |        | Chi-squared test within period sign | 2018–2019 vs 1998–2002 |                  | 2018–2019 vs 2008–2012 |                  |
|                   | n         | %                                    | 95% CI |                                     | n         | %  | 95% CI |                                     | n         | %  | 95% CI |                                     | Diff                   | chi-squared sign | Diff                   | chi-squared sign |
| Higher education  | 621       | 53                                   | 49 57  | ns                                  | 555       | 38 | 34 42  | ns                                  | 314       | 36 | 30 41  | ns                                  | -18                    | ***              | -2                     | ns               |
| Lower education   | 1063      | 54                                   | 51 57  |                                     | 610       | 40 | 36 44  |                                     | 168       | 38 | 30 45  |                                     | -16                    | **               | -2                     | ns               |
|                   |           | Diagnosed but untreated hypertension |        |                                     |           |    |        |                                     |           |    |        |                                     |                        |                  |                        |                  |
| Educational level | 1998–2002 |                                      |        | Chi-squared test within period sign | 2008–2012 |    |        | Chi-squared test within period sign | 2018–2019 |    |        | Chi-squared test within period sign | 2018–2019 vs 1998–2002 |                  | 2018–2019 vs 2008–2012 |                  |
|                   | n         | %                                    | 95% CI |                                     | n         | %  | 95% CI |                                     | n         | %  | 95% CI |                                     | Diff                   | chi-squared sign | Diff                   | chi-squared sign |
| Higher education  | 621       | 16                                   | 13 19  | ns                                  | 555       | 20 | 17 23  | ns                                  | 314       | 13 | 10 17  | ns                                  | -3                     | ns               | -6                     | *                |
| Lower education   | 1063      | 15                                   | 13 17  |                                     | 610       | 16 | 13 19  |                                     | 168       | 16 | 10 21  |                                     | 1                      | ***              | -0.4                   | ns               |
|                   |           | Uncontrolled hypertension            |        |                                     |           |    |        |                                     |           |    |        |                                     |                        |                  |                        |                  |
| Educational level | 1998–2002 |                                      |        | Chi-squared test within period sign | 2008–2012 |    |        | Chi-squared test within period sign | 2018–2019 |    |        | Chi-squared test within period sign | 2018–2019 vs 1998–2002 |                  | 2018–2019 vs 2008–2012 |                  |
|                   | n         | %                                    | 95% CI |                                     | n         | %  | 95% CI |                                     | n         | %  | 95% CI |                                     | Diff                   | chi-squared sign | Diff                   | chi-squared sign |
| Higher education  | 621       | 24                                   | 21 28  | ns                                  | 555       | 21 | 18 25  | **                                  | 314       | 21 | 17 26  | ns                                  | -3                     | ns               | 0.1                    | ns               |
| Lower education   | 1063      | 25                                   | 22 27  |                                     | 610       | 29 | 25 32  |                                     | 168       | 26 | 20 33  |                                     | 2                      | ***              | -2                     | ns               |
|                   |           | Controlled hypertension              |        |                                     |           |    |        |                                     |           |    |        |                                     |                        |                  |                        |                  |
| Educational level | 1998–2002 |                                      |        | Chi-squared test within period sign | 2008–2012 |    |        | Chi-squared test within period sign | 2018–2019 |    |        | Chi-squared test within period sign | 2018–2019 vs 1998–2002 |                  | 2018–2019 vs 2008–2012 |                  |
|                   | n         | %                                    | 95% CI |                                     | n         | %  | 95% CI |                                     | n         | %  | 95% CI |                                     | Diff                   | chi-squared sign | Diff                   | chi-squared sign |
| Higher education  | 621       | 6                                    | 4 8    | ns                                  | 555       | 21 | 18 25  | **                                  | 314       | 30 | 25 35  | *                                   | 24                     | ***              | 8                      | **               |
| Lower education   | 1063      | 7                                    | 5 8    |                                     | 610       | 15 | 12 18  |                                     | 168       | 20 | 14 26  |                                     | 13                     | **               | 5                      | ns               |

Prevalence are age-standardized by ISTAT Italian population 2000, 2010 and 2019 respectively. CI: confidence interval. Diff: prevalence difference between 2018–2019 and 1998–2002 or 2018–2019 and 2008–2012; the values are approximated taking into account the first decimal of prevalence. Higher education - high school or college; lower education - primary or middle school. Chi-squared test to compare prevalences between periods and among age classes within the period. Raised blood pressure: systolic blood pressure  $\geq 140$  mmHg and/or diastolic blood pressure  $\geq 90$  mmHg. Hypertension: systolic blood pressure  $\geq 140$  mmHg and/or diastolic blood pressure  $\geq 90$  mmHg and/or under specific pharmacological treatment. Hypertension is divided into 'undiagnosed', 'diagnosed but untreated', 'uncontrolled' (treated and SBP  $\geq 140$  mmHg or DBP  $\geq 90$  mmHg) and 'controlled' (treated and SBP  $< 140$  mmHg and DBP  $< 90$  mmHg). Pool of the following Italian Regions: Piedmont, Lombardy, Liguria, Emilia Romagna, Tuscany, Lazio, Abruzzo, Basilicata, Calabria, and Sicily.

**Table S9. Prevalence of blood pressure treatment, raised blood pressure, hypertension and state of hypertension control based on measurements, by educational class and period. Italian resident women aged 35–74 years, the CUORE Project Surveys 1998-2002, 2008-2012 and 2018-2019.**

| WOMEN                                |           |    |        |                                     |           |    |        |                                     |           |    |        |                        |                  |                        |                  |
|--------------------------------------|-----------|----|--------|-------------------------------------|-----------|----|--------|-------------------------------------|-----------|----|--------|------------------------|------------------|------------------------|------------------|
| Blood pressure drug treatment        |           |    |        |                                     |           |    |        |                                     |           |    |        |                        |                  |                        |                  |
| Educational level                    | 1998-2002 |    |        | Chi-squared test within period sign | 2008-2012 |    |        | Chi-squared test within period sign | 2018-2019 |    |        | 2018-2019 vs 1998-2002 |                  | 2018-2019 vs 2008-2012 |                  |
|                                      | n         | %  | 95% CI |                                     | n         | %  | 95% CI |                                     | n         | %  | 95% CI | Diff                   | chi-squared sign | Diff                   | chi-squared sign |
| Higher education                     | 1052      | 16 | 14 19  | ***                                 | 1167      | 19 | 16 21  | ***                                 | 725       | 19 | 17 22  | 3                      | ns               | 1                      | ns               |
| Lower education                      | 1887      | 23 | 22 25  |                                     | 1017      | 26 | 23 28  |                                     | 339       | 27 | 23 32  | 4                      | ns               | 2                      | ns               |
|                                      |           |    |        |                                     |           |    |        |                                     |           |    |        |                        |                  |                        |                  |
| Raised blood pressure                |           |    |        |                                     |           |    |        |                                     |           |    |        |                        |                  |                        |                  |
| Educational level                    | 1998-2002 |    |        | Chi-squared test within period sign | 2008-2012 |    |        | Chi-squared test within period sign | 2018-2019 |    |        | 2018-2019 vs 1998-2002 |                  | 2018-2019 vs 2008-2012 |                  |
|                                      | n         | %  | 95% CI |                                     | n         | %  | 95% CI |                                     | n         | %  | 95% CI | Diff                   | chi-squared sign | Diff                   | chi-squared sign |
| Higher education                     | 1052      | 35 | 32 38  | **                                  | 1167      | 22 | 19 24  | ***                                 | 725       | 14 | 12 17  | -21                    | ***              | -7                     | ***              |
| Lower education                      | 1887      | 42 | 40 44  |                                     | 1017      | 29 | 26 32  |                                     | 339       | 21 | 17 25  | -21                    | ***              | -8                     | **               |
|                                      |           |    |        |                                     |           |    |        |                                     |           |    |        |                        |                  |                        |                  |
| Hypertension                         |           |    |        |                                     |           |    |        |                                     |           |    |        |                        |                  |                        |                  |
| Educational level                    | 1998-2002 |    |        | Chi-squared test within period sign | 2008-2012 |    |        | Chi-squared test within period sign | 2018-2019 |    |        | 2018-2019 vs 1998-2002 |                  | 2018-2019 vs 2008-2012 |                  |
|                                      | n         | %  | 95% CI |                                     | n         | %  | 95% CI |                                     | n         | %  | 95% CI | Diff                   | chi-squared sign | Diff                   | chi-squared sign |
| Higher education                     | 1052      | 40 | 37 43  | **                                  | 1167      | 31 | 28 34  | ***                                 | 725       | 28 | 25 31  | -12                    | ***              | -3                     | ns               |
| Lower education                      | 1887      | 47 | 45 49  |                                     | 1017      | 40 | 37 43  |                                     | 339       | 39 | 34 44  | -8                     | **               | -1                     | ns               |
|                                      |           |    |        |                                     |           |    |        |                                     |           |    |        |                        |                  |                        |                  |
| Undiagnosed hypertension             |           |    |        |                                     |           |    |        |                                     |           |    |        |                        |                  |                        |                  |
| Educational level                    | 1998-2002 |    |        | Chi-squared test within period sign | 2008-2012 |    |        | Chi-squared test within period sign | 2018-2019 |    |        | 2018-2019 vs 1998-2002 |                  | 2018-2019 vs 2008-2012 |                  |
|                                      | n         | %  | 95% CI |                                     | n         | %  | 95% CI |                                     | n         | %  | 95% CI | Diff                   | chi-squared sign | Diff                   | chi-squared sign |
| Higher education                     | 337       | 47 | 42 53  | ns                                  | 311       | 36 | 31 42  | **                                  | 192       | 27 | 21 34  | -20                    | ***              | -9                     | *                |
| Lower education                      | 1037      | 43 | 40 46  |                                     | 534       | 25 | 21 28  |                                     | 172       | 29 | 23 36  | -14                    | **               | 5                      | ns               |
|                                      |           |    |        |                                     |           |    |        |                                     |           |    |        |                        |                  |                        |                  |
| Diagnosed but untreated hypertension |           |    |        |                                     |           |    |        |                                     |           |    |        |                        |                  |                        |                  |
| Educational level                    | 1998-2002 |    |        | Chi-squared test within period sign | 2008-2012 |    |        | Chi-squared test within period sign | 2018-2019 |    |        | 2018-2019 vs 1998-2002 |                  | 2018-2019 vs 2008-2012 |                  |
|                                      | n         | %  | 95% CI |                                     | n         | %  | 95% CI |                                     | n         | %  | 95% CI | Diff                   | chi-squared sign | Diff                   | chi-squared sign |
| Higher education                     | 337       | 19 | 14 23  | ns                                  | 311       | 15 | 11 19  | ns                                  | 192       | 16 | 11 22  | -2                     | ns               | 1                      | ns               |
| Lower education                      | 1037      | 15 | 13 18  |                                     | 534       | 17 | 13 20  |                                     | 172       | 13 | 8 18   | -3                     | ***              | -4                     | *                |
|                                      |           |    |        |                                     |           |    |        |                                     |           |    |        |                        |                  |                        |                  |
| Uncontrolled hypertension            |           |    |        |                                     |           |    |        |                                     |           |    |        |                        |                  |                        |                  |
| Educational level                    | 1998-2002 |    |        | Chi-squared test within period sign | 2008-2012 |    |        | Chi-squared test within period sign | 2018-2019 |    |        | 2018-2019 vs 1998-2002 |                  | 2018-2019 vs 2008-2012 |                  |
|                                      | n         | %  | 95% CI |                                     | n         | %  | 95% CI |                                     | n         | %  | 95% CI | Diff                   | chi-squared sign | Diff                   | chi-squared sign |
| Higher education                     | 337       | 23 | 19 28  | **                                  | 311       | 22 | 18 27  | ns                                  | 192       | 15 | 10 20  | -8                     | *                | -7                     | *                |
| Lower education                      | 1037      | 31 | 29 34  |                                     | 534       | 28 | 25 32  |                                     | 172       | 17 | 12 23  | -14                    | ***              | -11                    | ns               |
|                                      |           |    |        |                                     |           |    |        |                                     |           |    |        |                        |                  |                        |                  |
| Controlled hypertension              |           |    |        |                                     |           |    |        |                                     |           |    |        |                        |                  |                        |                  |
| Educational level                    | 1998-2002 |    |        | Chi-squared test within period sign | 2008-2012 |    |        | Chi-squared test within period sign | 2018-2019 |    |        | 2018-2019 vs 1998-2002 |                  | 2018-2019 vs 2008-2012 |                  |
|                                      | n         | %  | 95% CI |                                     | n         | %  | 95% CI |                                     | n         | %  | 95% CI | Diff                   | chi-squared sign | Diff                   | chi-squared sign |
| Higher education                     | 337       | 11 | 7 14   | ns                                  | 311       | 26 | 21 31  | ns                                  | 192       | 41 | 34 48  | 31                     | ***              | 15                     | **               |
| Lower education                      | 1037      | 10 | 8 12   |                                     | 534       | 31 | 27 34  |                                     | 172       | 40 | 33 48  | 30                     | ***              | 10                     | ns               |
|                                      |           |    |        |                                     |           |    |        |                                     |           |    |        |                        |                  |                        |                  |

Prevalence are age-standardized by ISTAT Italian population 2000, 2010 and 2019 respectively. CI: confidence interval. Diff: prevalence difference between 2018–2019 and 1998–2002 or 2018–2019 and 2008–2012; the values are approximated taking into account the first decimal of prevalence. Higher education - high school or college; lower education - primary or middle school. Chi-squared test to compare prevalences between periods and among age classes within the period. Raised blood pressure: systolic blood pressure  $\geq 140$  mmHg and/or diastolic blood pressure  $\geq 90$  mmHg. Hypertension: systolic blood pressure  $\geq 140$  mmHg and/or diastolic blood pressure  $\geq 90$ . Hypertension is divided into 'undiagnosed', 'diagnosed but untreated', 'uncontrolled' (treated and SBP  $\geq 140$  mmHg or DBP  $\geq 90$  mmHg) and 'controlled' (treated and SBP  $< 140$  mmHg and DBP  $< 90$  mmHg). Pool of the following Italian Regions: Piedmont, Lombardy, Liguria, Emilia Romagna, Tuscany, Lazio, Abruzzo, Basilicata, Calabria, and Sicily.

**Table S10. Age-standardized blood pressure mean values, and prevalence of raised blood pressure, hypertension and controlled hypertension based on measurements by sex and Italian Region. Italian resident men and women aged 35–74 years, the CUORE Project Survey 2018–2019.**

|                |     | 2018-2019                      |    |       |                                 |           |       |                       |        |           |              |        |           |                         |        |           |    |    |
|----------------|-----|--------------------------------|----|-------|---------------------------------|-----------|-------|-----------------------|--------|-----------|--------------|--------|-----------|-------------------------|--------|-----------|----|----|
|                |     | MEN                            |    |       |                                 |           |       |                       |        |           |              |        |           |                         |        |           |    |    |
| Italian Region | n   | Systolic blood pressure (mmHg) |    |       | Diastolic blood pressure (mmHg) |           |       | Raised blood pressure |        |           | Hypertension |        |           | Controlled hypertension |        |           |    |    |
|                |     | mean                           | SD | 95%CI | mean                            | SD        | 95%CI | %                     | 95% CI |           | %            | 95% CI |           | %                       | 95% CI |           |    |    |
| Abruzzo        | 102 | <b>134</b>                     | 14 | 132   | 137                             | <b>78</b> | 10    | 76                    | 80     | <b>36</b> | 27           | 45     | <b>47</b> | 37                      | 56     | <b>18</b> | 10 | 25 |
| Calabria       | 101 | <b>132</b>                     | 13 | 130   | 135                             | <b>76</b> | 9     | 75                    | 78     | <b>31</b> | 22           | 40     | <b>49</b> | 39                      | 59     | <b>31</b> | 22 | 40 |
| Liguria        | 104 | <b>127</b>                     | 12 | 125   | 130                             | <b>76</b> | 10    | 74                    | 78     | <b>20</b> | 12           | 27     | <b>40</b> | 30                      | 49     | <b>31</b> | 22 | 40 |
| Lazio          | 99  | <b>130</b>                     | 13 | 127   | 133                             | <b>79</b> | 10    | 77                    | 81     | <b>29</b> | 20           | 38     | <b>47</b> | 37                      | 57     | <b>31</b> | 22 | 40 |
| Lombardy       | 98  | <b>134</b>                     | 15 | 131   | 137                             | <b>78</b> | 9     | 76                    | 80     | <b>37</b> | 27           | 46     | <b>48</b> | 38                      | 58     | <b>19</b> | 11 | 26 |
| Piedmont       | 104 | <b>129</b>                     | 13 | 126   | 131                             | <b>75</b> | 9     | 73                    | 77     | <b>18</b> | 11           | 26     | <b>35</b> | 26                      | 45     | <b>43</b> | 34 | 53 |
| Emilia Romagna | 104 | <b>134</b>                     | 15 | 131   | 137                             | <b>79</b> | 10    | 77                    | 81     | <b>30</b> | 21           | 39     | <b>42</b> | 33                      | 51     | <b>20</b> | 12 | 27 |
| Basilicata     | 106 | <b>134</b>                     | 15 | 132   | 137                             | <b>80</b> | 10    | 78                    | 82     | <b>35</b> | 26           | 44     | <b>48</b> | 39                      | 58     | <b>27</b> | 19 | 36 |
| Tuscany        | 108 | <b>129</b>                     | 13 | 127   | 132                             | <b>77</b> | 9     | 75                    | 79     | <b>28</b> | 20           | 37     | <b>40</b> | 31                      | 50     | <b>25</b> | 17 | 33 |
| Sicily         | 105 | <b>132</b>                     | 13 | 129   | 134                             | <b>78</b> | 10    | 76                    | 80     | <b>33</b> | 24           | 42     | <b>44</b> | 35                      | 54     | <b>27</b> | 18 | 35 |
|                |     | WOMEN                          |    |       |                                 |           |       |                       |        |           |              |        |           |                         |        |           |    |    |
| Italian Region | n   | Systolic blood pressure (mmHg) |    |       | Diastolic blood pressure (mmHg) |           |       | Raised blood pressure |        |           | Hypertension |        |           | Controlled hypertension |        |           |    |    |
|                |     | mean                           | SD | 95%CI | mean                            | SD        | 95%CI | %                     | 95% CI |           | %            | 95% CI |           | %                       | 95% CI |           |    |    |
| Abruzzo        | 104 | <b>122</b>                     | 17 | 118   | 125                             | <b>73</b> | 10    | 71                    | 75     | <b>14</b> | 8            | 21     | <b>31</b> | 22                      | 40     | <b>45</b> | 35 | 54 |
| Calabria       | 109 | <b>121</b>                     | 14 | 119   | 124                             | <b>70</b> | 10    | 68                    | 72     | <b>16</b> | 9            | 23     | <b>40</b> | 31                      | 50     | <b>48</b> | 38 | 57 |
| Liguria        | 107 | <b>117</b>                     | 15 | 114   | 120                             | <b>72</b> | 11    | 70                    | 74     | <b>15</b> | 8            | 22     | <b>30</b> | 21                      | 38     | <b>32</b> | 23 | 40 |
| Lazio          | 114 | <b>124</b>                     | 14 | 122   | 127                             | <b>76</b> | 9     | 74                    | 78     | <b>16</b> | 9            | 22     | <b>35</b> | 26                      | 43     | <b>68</b> | 60 | 77 |
| Lombardy       | 100 | <b>127</b>                     | 18 | 124   | 131                             | <b>75</b> | 11    | 73                    | 77     | <b>24</b> | 16           | 33     | <b>37</b> | 27                      | 46     | <b>35</b> | 25 | 44 |
| Piedmont       | 113 | <b>117</b>                     | 13 | 115   | 119                             | <b>70</b> | 9     | 68                    | 71     | <b>8</b>  | 3            | 13     | <b>16</b> | 10                      | 23     | <b>43</b> | 34 | 53 |
| Emilia Romagna | 106 | <b>127</b>                     | 16 | 124   | 130                             | <b>76</b> | 11    | 74                    | 78     | <b>24</b> | 16           | 32     | <b>40</b> | 30                      | 49     | <b>32</b> | 23 | 41 |
| Basilicata     | 114 | <b>121</b>                     | 16 | 118   | 124                             | <b>72</b> | 10    | 70                    | 74     | <b>16</b> | 9            | 23     | <b>31</b> | 23                      | 39     | <b>22</b> | 15 | 30 |
| Tuscany        | 97  | <b>120</b>                     | 15 | 117   | 123                             | <b>72</b> | 9     | 70                    | 74     | <b>15</b> | 8            | 23     | <b>22</b> | 14                      | 31     | <b>22</b> | 14 | 30 |
| Sicily         | 102 | <b>124</b>                     | 14 | 121   | 127                             | <b>74</b> | 9     | 72                    | 76     | <b>17</b> | 10           | 24     | <b>37</b> | 27                      | 46     | <b>63</b> | 54 | 73 |

SD: standard deviations. Means, standard deviations and prevalences were age-standardized by Italian National Institute of Statistics-ISTAT Italian population 2019. Raised blood pressure: systolic blood pressure  $\geq 140$  mmHg and/or diastolic blood pressure  $\geq 90$  mmHg. Hypertension: systolic blood pressure  $\geq 140$  mmHg and/or diastolic blood pressure  $\geq 90$  mmHg and/or under specific pharmacological treatment. Controlled hypertension: treated and SBP  $< 140$  mmHg and DBP  $< 90$  mmHg. Regional data for 1998–2002 and 2008–2012 CUORE Project surveys were available at <http://www.cuore.iss.it/eng/survey/cuoredata>.



**Table S11. Blood pressure and heart rate measurements and prevalence of blood pressure treatment, raised blood pressure, hypertension and state of hypertension control, (age-adjusted using the European standard population) by sex and period. Italian resident men and women aged 35–74 years, the CUORE Project Surveys 1998-2002, 2008-2012 and 2018-2019.**

|  |                                       | MEN       |        |         |           |        |         |           |        |         |                        |                     |                        |                     |
|--|---------------------------------------|-----------|--------|---------|-----------|--------|---------|-----------|--------|---------|------------------------|---------------------|------------------------|---------------------|
|  |                                       | 1998-2002 |        |         | 2008-2012 |        |         | 2018-2019 |        |         | 2018-2019 vs 1998-2002 |                     | 2018-2019 vs 2008-2012 |                     |
|  |                                       | n=2985    |        |         | n=2218    |        |         | n=1031    |        |         | Diff                   | t-test p-value      | Diff                   | t-test p-value      |
|  |                                       | mean      | SD     | 95% CI  | mean      | SD     | 95% CI  | mean      | SD     | 95% CI  |                        |                     |                        |                     |
|  | Systolic blood pressure - SBP (mmHg)  | 136       | 18     | 136 137 | 132       | 16     | 132 133 | 132       | 14     | 131 132 | -5                     | ***                 | -1                     | ns                  |
|  | Diastolic blood pressure - DBP (mmHg) | 86        | 11     | 86 87   | 84        | 10     | 83 84   | 77        | 10     | 77 78   | -9                     | ***                 | -6                     | ***                 |
|  | SBP not under drug treatment (mmHg)   | 134       | 17     | 133 135 | 131       | 16     | 130 131 | 131       | 14     | 130 132 | -3                     | ***                 | 0.3                    | ns                  |
|  | DBP not under drug treatment (mmHg)   | 85        | 10     | 85 86   | 83        | 10     | 83 84   | 77        | 10     | 76 77   | -9                     | ***                 | -6                     | ***                 |
|  | Heart rate (beats per minute)         | 66        | 11     | 66 66   | 69        | 10     | 68 69   | 72        | 12     | 71 72   | 6                      | ***                 | 3                      | ***                 |
|  |                                       | %         | 95% CI |         | %         | 95% CI |         | %         | 95% CI |         | Diff                   | chi-squared p-value | Diff                   | chi-squared p-value |
|  | Blood pressure drug treatment         | 20        | 18     | 21      | 26        | 24     | 27      | 25        | 23     | 28      | 6                      | **                  | -0.4                   | ns                  |
|  | Raised blood bressure                 | 51        | 49     | 53      | 41        | 39     | 43      | 30        | 27     | 32      | -21                    | ***                 | -11                    | ***                 |
|  | Hypertension                          | 55        | 53     | 57      | 51        | 49     | 53      | 44        | 41     | 47      | -11                    | ***                 | -7                     | **                  |
|  | Hypertension                          |           |        |         |           |        |         |           |        |         |                        |                     |                        |                     |
|  | Undiagnosed                           | 53        | 50     | 55      | 39        | 36     | 41      | 37        | 32     | 41      | -16                    | ***                 | -2                     | ns                  |
|  | Diagnosed but untreated               | 15        | 14     | 17      | 18        | 16     | 20      | 14        | 11     | 17      | -1                     | ns                  | -3                     | ns                  |
|  | Uncontrolled                          | 26        | 23     | 28      | 26        | 23     | 28      | 22        | 18     | 26      | -4                     | ns                  | -4                     | ns                  |
|  | Controlled                            | 7         | 5      | 8       | 18        | 16     | 20      | 27        | 23     | 31      | 20                     | ***                 | 9                      | ***                 |
|  |                                       | WOMEN     |        |         |           |        |         |           |        |         |                        |                     |                        |                     |
|  |                                       | 1998-2002 |        |         | 2008-2012 |        |         | 2018-2019 |        |         | 2018-2019 vs 1998-2002 |                     | 2018-2019 vs 2008-2012 |                     |
|  |                                       | n=2951    |        |         | n=2185    |        |         | n=1066    |        |         | Diff                   | t-test p-value      | Diff                   | t-test p-value      |
|  |                                       | mean      | SD     | 95% CI  | mean      | SD     | 95% CI  | mean      | SD     | 95% CI  |                        |                     |                        |                     |
|  | Systolic blood pressure - SBP (mmHg)  | 132       | 18     | 131 132 | 127       | 17     | 126 127 | 122       | 16     | 121 123 | -10                    | ***                 | -5                     | ***                 |
|  | Diastolic blood pressure - DBP (mmHg) | 82        | 10     | 82 83   | 79        | 9      | 78 79   | 73        | 11     | 72 73   | -9                     | ***                 | -6                     | ***                 |
|  | SBP not under drug treatment (mmHg)   | 129       | 16     | 128 129 | 124       | 15     | 123 125 | 120       | 15     | 119 121 | -9                     | ***                 | -4                     | ***                 |
|  | DBP not under drug treatment (mmHg)   | 81        | 10     | 80 81   | 78        | 9      | 77 78   | 72        | 10     | 71 72   | -9                     | ***                 | -6                     | ***                 |
|  | Heart rate (beats per minute)         | 70        | 11     | 69 70   | 71        | 9      | 71 71   | 73        | 11     | 72 73   | 3                      | ***                 | 2                      | ***                 |
|  |                                       | %         | 95% CI |         | %         | 95% CI |         | %         | 95% CI |         | Diff                   | chi-squared p-value | Diff                   | chi-squared p-value |
|  | Blood pressure drug treatment         | 22        | 20     | 23      | 23        | 21     | 25      | 22        | 19     | 24      | 0.3                    | ns                  | -1                     | ns                  |
|  | Raised blood bressure                 | 40        | 38     | 41      | 26        | 24     | 28      | 16        | 14     | 18      | -23                    | ***                 | -10                    | ***                 |
|  | Hypertension                          | 45        | 43     | 46      | 36        | 34     | 38      | 31        | 28     | 34      | -14                    | ***                 | -5                     | **                  |
|  | Hypertension                          |           |        |         |           |        |         |           |        |         |                        |                     |                        |                     |
|  | Undiagnosed                           | 44        | 42     | 47      | 31        | 28     | 34      | 28        | 24     | 33      | -16                    | ***                 | -3                     | ns                  |
|  | Diagnosed but untreated               | 16        | 14     | 18      | 15        | 13     | 18      | 16        | 12     | 20      | 0.3                    | ns                  | 1                      | ns                  |
|  | Uncontrolled                          | 30        | 27     | 32      | 26        | 24     | 29      | 16        | 12     | 19      | -14                    | ***                 | -11                    | ***                 |
|  | Controlled                            | 10        | 9      | 12      | 27        | 24     | 30      | 40        | 35     | 45      | 30                     | ***                 | 13                     | ***                 |

Means, standard deviation and prevalence are age-standardized by European standard population 2013. SD: standard deviation. CI: confidence interval. Diff: mean or percentage difference between 2018–2019 and 1998–2002 or 2018–2019 and 2008–2012; the values are approximated taking into account the first decimal of means or prevalence. t-test to compare mean values between periods. Chi-squared test to compare prevalences between periods. Raised blood pressure: systolic blood pressure  $\geq 140$  mmHg and/or diastolic blood pressure  $\geq 90$  mmHg. Hypertension: systolic blood pressure  $\geq 140$  mmHg and/or diastolic blood pressure  $\geq 90$  mmHg and/or under specific pharmacological treatment. Hypertension is divided into ‘undiagnosed’, ‘diagnosed but untreated’, ‘uncontrolled’ (treated and SBP  $\geq 140$  mmHg or DBP  $\geq 90$  mmHg) and ‘controlled’ (treated and SBP  $< 140$  mmHg and DBP  $< 90$  mmHg). Pool of the following Italian Regions: Piedmont, Lombardy, Liguria, Emilia Romagna, Tuscany, Lazio, Abruzzo, Basilicata, Calabria, and Sicily.

**Table S12. Blood pressure measurements and heart rate mean levels by educational level and period (age-adjusted using the European standard population). Italian resident men aged 35–74 years, the CUORE Project Surveys 1998–2002, 2008–2012, and 2018–2019.**

| MEN                                                      |           |      |    |         |                              |           |      |    |         |                              |           |      |    |         |                        |             |                        |             |
|----------------------------------------------------------|-----------|------|----|---------|------------------------------|-----------|------|----|---------|------------------------------|-----------|------|----|---------|------------------------|-------------|------------------------|-------------|
| Systolic blood pressure (mmHg)                           |           |      |    |         |                              |           |      |    |         |                              |           |      |    |         |                        |             |                        |             |
| Educational level                                        | 1998-2002 |      |    |         | ANOVA within period sign *** | 2008-2012 |      |    |         | ANOVA within period sign *** | 2018-2019 |      |    |         | 2018-2019 vs 1998-2002 |             | 2018-2019 vs 2008-2012 |             |
|                                                          | n         | mean | SD | 95% CI  |                              | n         | mean | SD | 95% CI  |                              | n         | mean | SD | 95% CI  | Diff                   | t-test sign | Diff                   | t-test sign |
| Higher education                                         | 1249      | 135  | 17 | 135 136 |                              | 1183      | 131  | 15 | 130 131 |                              | 725       | 131  | 14 | 130 132 | -5                     | ***         | 0.1                    | ns          |
| Lower education                                          | 1730      | 137  | 18 | 136 138 |                              | 1018      | 134  | 17 | 133 135 |                              | 303       | 134  | 16 | 132 135 | -3                     | **          | -0.3                   | ns          |
| Diastolic blood pressure (mmHg)                          |           |      |    |         |                              |           |      |    |         |                              |           |      |    |         |                        |             |                        |             |
| Educational level                                        | 1998-2002 |      |    |         | ANOVA within period sign ns  | 2008-2012 |      |    |         | ANOVA within period sign ns  | 2018-2019 |      |    |         | 2018-2019 vs 1998-2002 |             | 2018-2019 vs 2008-2012 |             |
|                                                          | n         | mean | SD | 95% CI  |                              | n         | mean | SD | 95% CI  |                              | n         | mean | SD | 95% CI  | Diff                   | t-test sign | Diff                   | t-test sign |
| Higher education                                         | 1249      | 87   | 11 | 86 87   |                              | 1183      | 83   | 10 | 83 84   |                              | 725       | 77   | 10 | 77 78   | -9                     | ***         | -6                     | ***         |
| Lower education                                          | 1730      | 86   | 11 | 86 87   |                              | 1018      | 84   | 10 | 83 84   |                              | 303       | 78   | 10 | 77 79   | -8                     | ***         | -6                     | ***         |
| Systolic blood pressure not under drug treatment (mmHg)  |           |      |    |         |                              |           |      |    |         |                              |           |      |    |         |                        |             |                        |             |
| Educational level                                        | 1998-2002 |      |    |         | ANOVA within period sign *** | 2008-2012 |      |    |         | ANOVA within period sign *** | 2018-2019 |      |    |         | 2018-2019 vs 1998-2002 |             | 2018-2019 vs 2008-2012 |             |
|                                                          | n         | mean | SD | 95% CI  |                              | n         | mean | SD | 95% CI  |                              | n         | mean | SD | 95% CI  | Diff                   | t-test sign | Diff                   | t-test sign |
| Higher education                                         | 1046      | 134  | 16 | 133 135 |                              | 913       | 129  | 15 | 128 130 |                              | 537       | 130  | 13 | 129 131 | -4                     | ***         | 1                      | ns          |
| Lower education                                          | 1305      | 134  | 17 | 133 135 |                              | 680       | 132  | 16 | 131 133 |                              | 205       | 133  | 15 | 131 135 | -1                     | ns          | 1                      | ns          |
| Diastolic blood pressure not under drug treatment (mmHg) |           |      |    |         |                              |           |      |    |         |                              |           |      |    |         |                        |             |                        |             |
| Educational level                                        | 1998-2002 |      |    |         | ANOVA within period sign ns  | 2008-2012 |      |    |         | ANOVA within period sign ns  | 2018-2019 |      |    |         | 2018-2019 vs 1998-2002 |             | 2018-2019 vs 2008-2012 |             |
|                                                          | n         | mean | SD | 95% CI  |                              | n         | mean | SD | 95% CI  |                              | n         | mean | SD | 95% CI  | Diff                   | t-test sign | Diff                   | t-test sign |
| Higher education                                         | 1046      | 86   | 10 | 85 86   |                              | 913       | 83   | 10 | 82 83   |                              | 537       | 77   | 10 | 76 78   | -9                     | ***         | -6                     | ***         |
| Lower education                                          | 1305      | 85   | 10 | 85 86   |                              | 680       | 83   | 10 | 83 84   |                              | 205       | 77   | 9  | 76 78   | -8                     | ***         | -6                     | ***         |
| Heart rate (beats per minute)                            |           |      |    |         |                              |           |      |    |         |                              |           |      |    |         |                        |             |                        |             |
| Educational level                                        | 1998-2002 |      |    |         | ANOVA within period sign ns  | 2008-2012 |      |    |         | ANOVA within period sign ns  | 2018-2019 |      |    |         | 2018-2019 vs 1998-2002 |             | 2018-2019 vs 2008-2012 |             |
|                                                          | n         | mean | SD | 95% CI  |                              | n         | mean | SD | 95% CI  |                              | n         | mean | SD | 95% CI  | Diff                   | t-test sign | Diff                   | t-test sign |
| Higher education                                         | 1244      | 66   | 11 | 65 67   |                              | 1183      | 66   | 11 | 65 67   |                              | 725       | 71   | 11 | 70 71   | 5                      | ***         | 5                      | ***         |
| Lower education                                          | 1730      | 66   | 11 | 65 67   |                              | 1018      | 66   | 12 | 66 67   |                              | 303       | 74   | 12 | 73 76   | 8                      | ***         | 8                      | ***         |

Means and standard deviations age-standardized by European standard population 2013. SD: standard deviation; CI: confidence interval. Diff: mean difference between 2018–2019 and 1998–2002 or 2018–2019 and 2008–2012; the values are approximated taking into account the first decimal of means. Higher education - high school or college; lower education - primary or middle school. ANOVA: Analysis of Variance to compare variables among age classes within periods. t-test to compare variables between periods. \*\*\* p-value<0.0001; \*\* p-value<0.01; \*p-value<0.05; ns not significant p-value. Pool of the following Italian Regions: Piedmont, Lombardy, Liguria, Emilia Romagna, Tuscany, Lazio, Abruzzo, Basilicata, Calabria, and Sicily.



**Table S13. Blood pressure measurements and heart rate mean levels by educational level and period (age-adjusted using the European standard population). Italian resident women aged 35–74 years, the CUORE Project Surveys 1998–2002, 2008–2012, and 2018–2019.**

| WOMEN                                                    |           |      |    |         |                          |           |      |    |         |                          |           |      |    |         |                        |             |                        |             |
|----------------------------------------------------------|-----------|------|----|---------|--------------------------|-----------|------|----|---------|--------------------------|-----------|------|----|---------|------------------------|-------------|------------------------|-------------|
| Systolic blood pressure (mmHg)                           |           |      |    |         |                          |           |      |    |         |                          |           |      |    |         |                        |             |                        |             |
| Educational level                                        | 1998-2002 |      |    |         | ANOVA within period sign | 2008-2012 |      |    |         | ANOVA within period sign | 2018-2019 |      |    |         | 2018-2019 vs 1998-2002 |             | 2018-2019 vs 2008-2012 |             |
|                                                          | n         | mean | SD | 95% CI  |                          | n         | mean | SD | 95% CI  |                          | n         | mean | SD | 95% CI  | Diff                   | t-test sign | Diff                   | t-test sign |
| Higher education                                         | 1052      | 130  | 16 | 129 131 | ***                      | 1167      | 124  | 15 | 123 125 | ***                      | 725       | 120  | 15 | 119 121 | -10                    | ***         | -4                     | ***         |
| Lower education                                          | 1887      | 133  | 18 | 132 134 |                          | 1017      | 130  | 18 | 129 131 |                          | 339       | 125  | 17 | 123 127 | -8                     | ***         | -4                     | ***         |
| Diastolic blood pressure (mmHg)                          |           |      |    |         |                          |           |      |    |         |                          |           |      |    |         |                        |             |                        |             |
| Educational level                                        | 1998-2002 |      |    |         | ANOVA within period sign | 2008-2012 |      |    |         | ANOVA within period sign | 2018-2019 |      |    |         | 2018-2019 vs 1998-2002 |             | 2018-2019 vs 2008-2012 |             |
|                                                          | n         | mean | SD | 95% CI  |                          | n         | mean | SD | 95% CI  |                          | n         | mean | SD | 95% CI  | Diff                   | t-test sign | Diff                   | t-test sign |
| Higher education                                         | 1052      | 81   | 10 | 81 82   | ***                      | 1167      | 78   | 9  | 77 78   | ***                      | 725       | 72   | 11 | 72 73   | -9                     | ***         | -6                     | ***         |
| Lower education                                          | 1887      | 83   | 10 | 82 83   |                          | 1017      | 79   | 10 | 79 80   |                          | 339       | 74   | 10 | 73 75   | -9                     | ***         | -5                     | ***         |
| Systolic blood pressure not under drug treatment (mmHg)  |           |      |    |         |                          |           |      |    |         |                          |           |      |    |         |                        |             |                        |             |
| Educational level                                        | 1998-2002 |      |    |         | ANOVA within period sign | 2008-2012 |      |    |         | ANOVA within period sign | 2018-2019 |      |    |         | 2018-2019 vs 1998-2002 |             | 2018-2019 vs 2008-2012 |             |
|                                                          | n         | mean | SD | 95% CI  |                          | n         | mean | SD | 95% CI  |                          | n         | mean | SD | 95% CI  | Diff                   | t-test sign | Diff                   | t-test sign |
| Higher education                                         | 928       | 128  | 16 | 127 129 | ***                      | 992       | 122  | 14 | 121 122 | ***                      | 593       | 119  | 15 | 117 120 | -9                     | ***         | -3                     | ***         |
| Lower education                                          | 1331      | 129  | 16 | 129 130 |                          | 651       | 127  | 16 | 126 128 |                          | 203       | 123  | 16 | 121 125 | -6                     | ***         | -4                     | **          |
| Diastolic blood pressure not under drug treatment (mmHg) |           |      |    |         |                          |           |      |    |         |                          |           |      |    |         |                        |             |                        |             |
| Educational level                                        | 1998-2002 |      |    |         | ANOVA within period sign | 2008-2012 |      |    |         | ANOVA within period sign | 2018-2019 |      |    |         | 2018-2019 vs 1998-2002 |             | 2018-2019 vs 2008-2012 |             |
|                                                          | n         | mean | SD | 95% CI  |                          | n         | mean | SD | 95% CI  |                          | n         | mean | SD | 95% CI  | Diff                   | t-test sign | Diff                   | t-test sign |
| Higher education                                         | 928       | 81   | 10 | 80 81   | ***                      | 992       | 77   | 9  | 77 78   | ***                      | 593       | 71   | 10 | 70 72   | -9                     | ***         | -6                     | ***         |
| Lower education                                          | 1331      | 81   | 10 | 81 82   |                          | 651       | 78   | 9  | 78 79   |                          | 203       | 73   | 10 | 72 75   | -8                     | ***         | -5                     | ***         |
| Heart rate (beats per minute)                            |           |      |    |         |                          |           |      |    |         |                          |           |      |    |         |                        |             |                        |             |
| Educational level                                        | 1998-2002 |      |    |         | ANOVA within period sign | 2008-2012 |      |    |         | ANOVA within period sign | 2018-2019 |      |    |         | 2018-2019 vs 1998-2002 |             | 2018-2019 vs 2008-2012 |             |
|                                                          | n         | mean | SD | 95% CI  |                          | n         | mean | SD | 95% CI  |                          | n         | mean | SD | 95% CI  | Diff                   | t-test sign | Diff                   | t-test sign |
| Higher education                                         | 1047      | 69   | 11 | 69 70   | ns                       | 1167      | 71   | 9  | 70 71   | ns                       | 725       | 73   | 10 | 72 73   | 3                      | ***         | 2                      | **          |
| Lower education                                          | 1884      | 70   | 11 | 69 70   |                          | 1017      | 71   | 9  | 71 72   |                          | 339       | 73   | 11 | 72 75   | 4                      | ***         | 2                      | **          |

Means and standard deviations age-standardized by European standard population 2013. SD: standard deviation; CI: confidence interval. Diff: mean difference between 2018–2019 and 1998–2002 or 2018–2019 and 2008–2012; the values are approximated taking into account the first decimal of means. Higher education - high school or college; lower education - primary or middle school. ANOVA: Analysis of Variance to compare variables among age classes within periods. t-test to compare variables between periods. \*\*\* p-value<0.0001; \*\* p-value<0.01; \*p-value<0.05; ns not significant p-value. Pool of the following Italian Regions: Piedmont, Lombardy, Liguria, Emilia Romagna, Tuscany, Lazio, Abruzzo, Basilicata, Calabria, and Sicily.

**Table S14. Prevalence of blood pressure treatment, raised blood pressure, hypertension and state of hypertension control based on measurements, by educational class and period (age-adjusted using the European standard population). Italian resident men aged 35–74 years, the CUORE Project Surveys 1998–2002, 2008–2012 and 2018–2019.**

| MEN                                  |           |    |        |                                                  |           |    |        |                                                  |           |    |        |                                                  |                        |                  |                        |                  |
|--------------------------------------|-----------|----|--------|--------------------------------------------------|-----------|----|--------|--------------------------------------------------|-----------|----|--------|--------------------------------------------------|------------------------|------------------|------------------------|------------------|
| Blood pressure drug treatment        |           |    |        |                                                  |           |    |        |                                                  |           |    |        |                                                  |                        |                  |                        |                  |
| Educational level                    | 1998–2002 |    |        | Chi-squared test within period sign<br><i>ns</i> | 2008–2012 |    |        | Chi-squared test within period sign<br><i>ns</i> | 2018–2019 |    |        | Chi-squared test within period sign<br><i>ns</i> | 2018–2019 vs 1998–2002 |                  | 2018–2019 vs 2008–2012 |                  |
|                                      | n         | %  | 95% CI |                                                  | n         | %  | 95% CI |                                                  | n         | %  | 95% CI |                                                  | Diff                   | chi-squared sign | Diff                   | chi-squared sign |
| Higher education                     | 1249      | 19 | 16 21  |                                                  | 1183      | 26 | 23 28  |                                                  | 725       | 26 | 23 29  |                                                  | 7                      | **               | 0.2                    | <i>ns</i>        |
| Lower education                      | 1730      | 20 | 18 22  |                                                  | 1018      | 26 | 24 29  |                                                  | 303       | 24 | 19 29  |                                                  | 4                      | <i>ns</i>        | -2                     | <i>ns</i>        |
| Raised blood pressure                |           |    |        |                                                  |           |    |        |                                                  |           |    |        |                                                  |                        |                  |                        |                  |
| Educational level                    | 1998–2002 |    |        | Chi-squared test within period sign<br><i>ns</i> | 2008–2012 |    |        | Chi-squared test within period sign<br><b>**</b> | 2018–2019 |    |        | Chi-squared test within period sign<br><i>ns</i> | 2018–2019 vs 1998–2002 |                  | 2018–2019 vs 2008–2012 |                  |
|                                      | n         | %  | 95% CI |                                                  | n         | %  | 95% CI |                                                  | n         | %  | 95% CI |                                                  | Diff                   | chi-squared sign | Diff                   | chi-squared sign |
| Higher education                     | 1249      | 49 | 46 52  |                                                  | 1183      | 36 | 33 39  |                                                  | 725       | 28 | 25 31  |                                                  | -21                    | ***              | -8                     | **               |
| Lower education                      | 1730      | 52 | 50 55  |                                                  | 1018      | 44 | 41 47  |                                                  | 303       | 34 | 29 39  |                                                  | -18                    | ***              | -10                    | **               |
| Hypertension                         |           |    |        |                                                  |           |    |        |                                                  |           |    |        |                                                  |                        |                  |                        |                  |
| Educational level                    | 1998–2002 |    |        | Chi-squared test within period sign<br><b>*</b>  | 2008–2012 |    |        | Chi-squared test within period sign<br><i>ns</i> | 2018–2019 |    |        | Chi-squared test within period sign<br><i>ns</i> | 2018–2019 vs 1998–2002 |                  | 2018–2019 vs 2008–2012 |                  |
|                                      | n         | %  | 95% CI |                                                  | n         | %  | 95% CI |                                                  | n         | %  | 95% CI |                                                  | Diff                   | chi-squared sign | Diff                   | chi-squared sign |
| Higher education                     | 1249      | 53 | 50 55  |                                                  | 1183      | 49 | 46 52  |                                                  | 725       | 43 | 40 47  |                                                  | -9                     | ***              | -6                     | *                |
| Lower education                      | 1730      | 56 | 54 59  |                                                  | 1018      | 53 | 50 56  |                                                  | 303       | 46 | 40 52  |                                                  | -10                    | **               | -7                     | *                |
| Undiagnosed hypertension             |           |    |        |                                                  |           |    |        |                                                  |           |    |        |                                                  |                        |                  |                        |                  |
| Educational level                    | 1998–2002 |    |        | Chi-squared test within period sign<br><i>ns</i> | 2008–2012 |    |        | Chi-squared test within period sign<br><i>ns</i> | 2018–2019 |    |        | Chi-squared test within period sign<br><i>ns</i> | 2018–2019 vs 1998–2002 |                  | 2018–2019 vs 2008–2012 |                  |
|                                      | n         | %  | 95% CI |                                                  | n         | %  | 95% CI |                                                  | n         | %  | 95% CI |                                                  | Diff                   | chi-squared sign | Diff                   | chi-squared sign |
| Higher education                     | 621       | 53 | 49 57  |                                                  | 555       | 36 | 32 40  |                                                  | 314       | 36 | 31 41  |                                                  | -17                    | ***              | -0.2                   | <i>ns</i>        |
| Lower education                      | 1063      | 53 | 50 56  |                                                  | 610       | 39 | 35 43  |                                                  | 168       | 38 | 31 46  |                                                  | -15                    | **               | -1                     | <i>ns</i>        |
| Diagnosed but untreated hypertension |           |    |        |                                                  |           |    |        |                                                  |           |    |        |                                                  |                        |                  |                        |                  |
| Educational level                    | 1998–2002 |    |        | Chi-squared test within period sign<br><i>ns</i> | 2008–2012 |    |        | Chi-squared test within period sign<br><i>ns</i> | 2018–2019 |    |        | Chi-squared test within period sign<br><i>ns</i> | 2018–2019 vs 1998–2002 |                  | 2018–2019 vs 2008–2012 |                  |
|                                      | n         | %  | 95% CI |                                                  | n         | %  | 95% CI |                                                  | n         | %  | 95% CI |                                                  | Diff                   | chi-squared sign | Diff                   | chi-squared sign |
| Higher education                     | 621       | 16 | 13 19  |                                                  | 555       | 19 | 16 22  |                                                  | 314       | 13 | 10 17  |                                                  | -2                     | <i>ns</i>        | -6                     | *                |
| Lower education                      | 1063      | 15 | 12 17  |                                                  | 610       | 16 | 13 18  |                                                  | 168       | 15 | 10 21  |                                                  | 1                      | ***              | -0.1                   | <i>ns</i>        |
| Uncontrolled hypertension            |           |    |        |                                                  |           |    |        |                                                  |           |    |        |                                                  |                        |                  |                        |                  |
| Educational level                    | 1998–2002 |    |        | Chi-squared test within period sign<br><i>ns</i> | 2008–2012 |    |        | Chi-squared test within period sign<br><b>**</b> | 2018–2019 |    |        | Chi-squared test within period sign<br><i>ns</i> | 2018–2019 vs 1998–2002 |                  | 2018–2019 vs 2008–2012 |                  |
|                                      | n         | %  | 95% CI |                                                  | n         | %  | 95% CI |                                                  | n         | %  | 95% CI |                                                  | Diff                   | chi-squared sign | Diff                   | chi-squared sign |
| Higher education                     | 621       | 25 | 22 29  |                                                  | 555       | 22 | 19 26  |                                                  | 314       | 21 | 17 26  |                                                  | -4                     | <i>ns</i>        | -1                     | <i>ns</i>        |
| Lower education                      | 1063      | 26 | 23 28  |                                                  | 610       | 30 | 26 33  |                                                  | 168       | 26 | 19 33  |                                                  | 0.5                    | ***              | -4                     | <i>ns</i>        |
| Controlled hypertension              |           |    |        |                                                  |           |    |        |                                                  |           |    |        |                                                  |                        |                  |                        |                  |
| Educational level                    | 1998–2002 |    |        | Chi-squared test within period sign<br><i>ns</i> | 2008–2012 |    |        | Chi-squared test within period sign<br><b>**</b> | 2018–2019 |    |        | Chi-squared test within period sign<br><b>*</b>  | 2018–2019 vs 1998–2002 |                  | 2018–2019 vs 2008–2012 |                  |
|                                      | n         | %  | 95% CI |                                                  | n         | %  | 95% CI |                                                  | n         | %  | 95% CI |                                                  | Diff                   | chi-squared sign | Diff                   | chi-squared sign |
| Higher education                     | 621       | 6  | 4 8    |                                                  | 555       | 22 | 19 26  |                                                  | 314       | 30 | 24 35  |                                                  | 23                     | ***              | 7                      | *                |
| Lower education                      | 1063      | 7  | 5 8    |                                                  | 610       | 15 | 12 18  |                                                  | 168       | 20 | 14 26  |                                                  | 13                     | **               | 5                      | <i>ns</i>        |

Prevalence are age-standardized by age-standardized by European standard population 2013. CI: confidence interval. Diff: prevalence difference between 2018–2019 and 1998–2002 or 2018–2019 and 2008–2012; the values are approximated taking into account the first decimal of prevalence. Higher education - high school or college; lower education - primary or middle school. Chi-squared test to compare prevalences between periods and among age classes within the period. Raised blood pressure: systolic blood pressure  $\geq 140$  mmHg and/or diastolic blood pressure  $\geq 90$  mmHg. Hypertension: systolic blood pressure  $\geq 140$  mmHg and/or diastolic blood pressure  $\geq 90$  and/or under specific pharmacological treatment. Hypertension is divided into 'undiagnosed', 'diagnosed but untreated', 'uncontrolled' (treated and SBP  $\geq 140$  mmHg or DBP  $\geq 90$  mmHg) and 'controlled' (treated and SBP  $< 140$  mmHg and DBP  $< 90$  mmHg). Pool of the following Italian Regions: Piedmont, Lombardy, Liguria, Emilia Romagna, Tuscany, Lazio, Abruzzo, Basilicata, Calabria, and Sicily.

**Table S15. Prevalence of blood pressure treatment, raised blood pressure, hypertension and state of hypertension control based on measurements, by educational class and period (age-adjusted using the European standard population). Italian resident women aged 35–74 years, the CUORE Project Surveys 1998–2002, 2008–2012 and 2018–2019.**

| WOMEN                                |           |    |        |                                         |           |    |        |                                         |           |    |        |                                        |                        |                  |                        |                  |
|--------------------------------------|-----------|----|--------|-----------------------------------------|-----------|----|--------|-----------------------------------------|-----------|----|--------|----------------------------------------|------------------------|------------------|------------------------|------------------|
| Blood pressure drug treatment        |           |    |        |                                         |           |    |        |                                         |           |    |        |                                        |                        |                  |                        |                  |
| Educational level                    | 1998-2002 |    |        | Chi-squared test within period sign *** | 2008-2012 |    |        | Chi-squared test within period sign *** | 2018-2019 |    |        | Chi-squared test within period sign ** | 2018-2019 vs 1998-2002 |                  | 2018-2019 vs 2008-2012 |                  |
|                                      | n         | %  | 95% CI |                                         | n         | %  | 95% CI |                                         | n         | %  | 95% CI |                                        | Diff                   | chi-squared sign | Diff                   | chi-squared sign |
| Higher education                     | 1052      | 16 | 14 19  |                                         | 1167      | 19 | 17 21  |                                         | 725       | 19 | 16 22  |                                        | 2                      | ns               | -0.4                   | ns               |
| Lower education                      | 1887      | 24 | 22 25  |                                         | 1017      | 26 | 24 29  |                                         | 339       | 27 | 22 31  |                                        | 3                      | ns               | 0.4                    | ns               |
| Raised blood pressure                |           |    |        |                                         |           |    |        |                                         |           |    |        |                                        |                        |                  |                        |                  |
| Educational level                    | 1998-2002 |    |        | Chi-squared test within period sign **  | 2008-2012 |    |        | Chi-squared test within period sign *** | 2018-2019 |    |        | Chi-squared test within period sign ** | 2018-2019 vs 1998-2002 |                  | 2018-2019 vs 2008-2012 |                  |
|                                      | n         | %  | 95% CI |                                         | n         | %  | 95% CI |                                         | n         | %  | 95% CI |                                        | Diff                   | chi-squared sign | Diff                   | chi-squared sign |
| Higher education                     | 1052      | 35 | 32 38  |                                         | 1167      | 22 | 20 24  |                                         | 725       | 14 | 11 16  |                                        | -21                    | ***              | -8                     | ***              |
| Lower education                      | 1887      | 42 | 40 44  |                                         | 1017      | 30 | 27 32  |                                         | 339       | 21 | 16 25  |                                        | -21                    | ***              | -9                     | **               |
| Hypertension                         |           |    |        |                                         |           |    |        |                                         |           |    |        |                                        |                        |                  |                        |                  |
| Educational level                    | 1998-2002 |    |        | Chi-squared test within period sign **  | 2008-2012 |    |        | Chi-squared test within period sign *** | 2018-2019 |    |        | Chi-squared test within period sign ** | 2018-2019 vs 1998-2002 |                  | 2018-2019 vs 2008-2012 |                  |
|                                      | n         | %  | 95% CI |                                         | n         | %  | 95% CI |                                         | n         | %  | 95% CI |                                        | Diff                   | chi-squared sign | Diff                   | chi-squared sign |
| Higher education                     | 1052      | 40 | 37 43  |                                         | 1167      | 32 | 29 34  |                                         | 725       | 27 | 24 30  |                                        | -13                    | ***              | -5                     | *                |
| Lower education                      | 1887      | 47 | 45 49  |                                         | 1017      | 41 | 38 44  |                                         | 339       | 38 | 33 43  |                                        | -9                     | **               | -3                     | ns               |
| Undiagnosed hypertension             |           |    |        |                                         |           |    |        |                                         |           |    |        |                                        |                        |                  |                        |                  |
| Educational level                    | 1998-2002 |    |        | Chi-squared test within period sign ns  | 2008-2012 |    |        | Chi-squared test within period sign **  | 2018-2019 |    |        | Chi-squared test within period sign ns | 2018-2019 vs 1998-2002 |                  | 2018-2019 vs 2008-2012 |                  |
|                                      | n         | %  | 95% CI |                                         | n         | %  | 95% CI |                                         | n         | %  | 95% CI |                                        | Diff                   | chi-squared sign | Diff                   | chi-squared sign |
| Higher education                     | 337       | 47 | 42 52  |                                         | 311       | 36 | 30 41  |                                         | 192       | 28 | 21 34  |                                        | -19                    | ***              | -8                     | ns               |
| Lower education                      | 1037      | 43 | 40 46  |                                         | 534       | 25 | 21 28  |                                         | 172       | 31 | 24 38  |                                        | -12                    | **               | 6                      | ns               |
| Diagnosed but untreated hypertension |           |    |        |                                         |           |    |        |                                         |           |    |        |                                        |                        |                  |                        |                  |
| Educational level                    | 1998-2002 |    |        | Chi-squared test within period sign ns  | 2008-2012 |    |        | Chi-squared test within period sign ns  | 2018-2019 |    |        | Chi-squared test within period sign ns | 2018-2019 vs 1998-2002 |                  | 2018-2019 vs 2008-2012 |                  |
|                                      | n         | %  | 95% CI |                                         | n         | %  | 95% CI |                                         | n         | %  | 95% CI |                                        | Diff                   | chi-squared sign | Diff                   | chi-squared sign |
| Higher education                     | 337       | 19 | 14 23  |                                         | 311       | 15 | 11 19  |                                         | 192       | 17 | 12 23  |                                        | -1                     | ns               | 2                      | ns               |
| Lower education                      | 1037      | 15 | 13 18  |                                         | 534       | 16 | 13 19  |                                         | 172       | 13 | 8 18   |                                        | -2                     | ***              | -3                     | *                |
| Uncontrolled hypertension            |           |    |        |                                         |           |    |        |                                         |           |    |        |                                        |                        |                  |                        |                  |
| Educational level                    | 1998-2002 |    |        | Chi-squared test within period sign **  | 2008-2012 |    |        | Chi-squared test within period sign *   | 2018-2019 |    |        | Chi-squared test within period sign ns | 2018-2019 vs 1998-2002 |                  | 2018-2019 vs 2008-2012 |                  |
|                                      | n         | %  | 95% CI |                                         | n         | %  | 95% CI |                                         | n         | %  | 95% CI |                                        | Diff                   | chi-squared sign | Diff                   | chi-squared sign |
| Higher education                     | 337       | 24 | 19 28  |                                         | 311       | 23 | 18 27  |                                         | 192       | 14 | 9 19   |                                        | -9                     | *                | -8                     | *                |
| Lower education                      | 1037      | 32 | 29 34  |                                         | 534       | 29 | 25 33  |                                         | 172       | 17 | 11 22  |                                        | -15                    | ***              | -12                    | ns               |
| Controlled hypertension              |           |    |        |                                         |           |    |        |                                         |           |    |        |                                        |                        |                  |                        |                  |
| Educational level                    | 1998-2002 |    |        | Chi-squared test within period sign ns  | 2008-2012 |    |        | Chi-squared test within period sign ns  | 2018-2019 |    |        | Chi-squared test within period sign ns | 2018-2019 vs 1998-2002 |                  | 2018-2019 vs 2008-2012 |                  |
|                                      | n         | %  | 95% CI |                                         | n         | %  | 95% CI |                                         | n         | %  | 95% CI |                                        | Diff                   | chi-squared sign | Diff                   | chi-squared sign |
| Higher education                     | 337       | 11 | 7 14   |                                         | 311       | 27 | 22 31  |                                         | 192       | 40 | 33 47  |                                        | 30                     | ***              | 14                     | **               |
| Lower education                      | 1037      | 10 | 8 12   |                                         | 534       | 30 | 26 34  |                                         | 172       | 40 | 32 47  |                                        | 29                     | ***              | 9                      | ns               |

Prevalence are age-standardized by age-standardized by European standard population 2013. CI: confidence interval. Diff: prevalence difference between 2018–2019 and 1998–2002 or 2018–2019 and 2008–2012; the values are approximated taking into account the first decimal of prevalence. Higher education - high school or college; lower education - primary or middle school. Chi-squared test to compare prevalences between periods and among age classes within the period. Raised blood pressure: systolic blood pressure  $\geq 140$  mmHg and/or diastolic blood pressure  $\geq 90$  mmHg. Hypertension: systolic blood pressure  $\geq 140$  mmHg and/or diastolic blood pressure  $\geq 90$  and/or under specific pharmacological treatment. Hypertension is divided into ‘undiagnosed’, ‘diagnosed but untreated’, ‘uncontrolled’ (treated and SBP  $\geq 140$  mmHg or DBP  $\geq 90$  mmHg) and ‘controlled’ (treated and SBP  $< 140$  mmHg and DBP  $< 90$  mmHg). Pool of the following Italian Regions: Piedmont, Lombardy, Liguria, Emilia Romagna, Tuscany, Lazio, Abruzzo, Basilicata, Calabria, and Sicily.



STROBE Statement—Checklist of items that should be included in reports of *cross-sectional studies*

|                              | Item No | Recommendation                                                                                                                                                                                    | Page No             |
|------------------------------|---------|---------------------------------------------------------------------------------------------------------------------------------------------------------------------------------------------------|---------------------|
| <b>Title and abstract</b>    | 1       | (a) Indicate the study's design with a commonly used term in the title or the abstract                                                                                                            | 1 and 2             |
|                              |         | (b) Provide in the abstract an informative and balanced summary of what was done and what was found                                                                                               | 2                   |
| <b>Introduction</b>          |         |                                                                                                                                                                                                   |                     |
| Background/rationale         | 2       | Explain the scientific background and rationale for the investigation being reported                                                                                                              | 4                   |
| Objectives                   | 3       | State specific objectives, including any prespecified hypotheses                                                                                                                                  | 4                   |
| <b>Methods</b>               |         |                                                                                                                                                                                                   |                     |
| Study design                 | 4       | Present key elements of study design early in the paper                                                                                                                                           | 5                   |
| Setting                      | 5       | Describe the setting, locations, and relevant dates, including periods of recruitment, exposure, follow-up, and data collection                                                                   | 5                   |
| Participants                 | 6       | (a) Give the eligibility criteria, and the sources and methods of selection of participants                                                                                                       | 5                   |
| Variables                    | 7       | Clearly define all outcomes, exposures, predictors, potential confounders, and effect modifiers. Give diagnostic criteria, if applicable                                                          | 5 and 6             |
| Data sources/<br>measurement | 8*      | For each variable of interest, give sources of data and details of methods of assessment (measurement). Describe comparability of assessment methods if there is more than one group              | 5 and 6             |
| Bias                         | 9       | Describe any efforts to address potential sources of bias                                                                                                                                         | 14                  |
| Study size                   | 10      | Explain how the study size was arrived at                                                                                                                                                         | 5                   |
| Quantitative variables       | 11      | Explain how quantitative variables were handled in the analyses. If applicable, describe which groupings were chosen and why                                                                      | 5 and 6             |
| Statistical methods          | 12      | (a) Describe all statistical methods, including those used to control for confounding                                                                                                             | 6                   |
|                              |         | (b) Describe any methods used to examine subgroups and interactions                                                                                                                               | 6                   |
|                              |         | (c) Explain how missing data were addressed                                                                                                                                                       | 6                   |
|                              |         | (d) If applicable, describe analytical methods taking account of sampling strategy                                                                                                                | 5                   |
|                              |         | (e) Describe any sensitivity analyses                                                                                                                                                             | na                  |
| <b>Results</b>               |         |                                                                                                                                                                                                   |                     |
| Participants                 | 13*     | (a) Report numbers of individuals at each stage of study—eg numbers potentially eligible, examined for eligibility, confirmed eligible, included in the study, completing follow-up, and analysed | 6 and in all tables |
|                              |         | (b) Give reasons for non-participation at each stage                                                                                                                                              | 6                   |
|                              |         | (c) Consider use of a flow diagram                                                                                                                                                                | na                  |
| Descriptive data             | 14*     | (a) Give characteristics of study participants (eg demographic, clinical, social) and information on exposures and potential confounders                                                          | 6 and table s1      |
|                              |         | (b) Indicate number of participants with missing data for each variable of interest                                                                                                               | 6 and in all tables |

|                          |     |                                                                                                                                                                                                              |                            |
|--------------------------|-----|--------------------------------------------------------------------------------------------------------------------------------------------------------------------------------------------------------------|----------------------------|
| Outcome data             | 15* | Report numbers of outcome events or summary measures                                                                                                                                                         | 6 and in all tables        |
| Main results             | 16  | (a) Give unadjusted estimates and, if applicable, confounder-adjusted estimates and their precision (eg, 95% confidence interval). Make clear which confounders were adjusted for and why they were included | 6-12 and in all tables     |
|                          |     | (b) Report category boundaries when continuous variables were categorized                                                                                                                                    | 6-12 and in related tables |
|                          |     | (c) If relevant, consider translating estimates of relative risk into absolute risk for a meaningful time period                                                                                             | na                         |
| Other analyses           | 17  | Report other analyses done—eg analyses of subgroups and interactions, and sensitivity analyses                                                                                                               | 6-12 and in all tables     |
| <b>Discussion</b>        |     |                                                                                                                                                                                                              |                            |
| Key results              | 18  | Summarise key results with reference to study objectives                                                                                                                                                     | 6-13                       |
| Limitations              | 19  | Discuss limitations of the study, taking into account sources of potential bias or imprecision. Discuss both direction and magnitude of any potential bias                                                   | 14                         |
| Interpretation           | 20  | Give a cautious overall interpretation of results considering objectives, limitations, multiplicity of analyses, results from similar studies, and other relevant evidence                                   | 14-15                      |
| Generalisability         | 21  | Discuss the generalisability (external validity) of the study results                                                                                                                                        | 12-15                      |
| <b>Other information</b> |     |                                                                                                                                                                                                              |                            |
| Funding                  | 22  | Give the source of funding and the role of the funders for the present study and, if applicable, for the original study on which the present article is based                                                | 18                         |

\*Give information separately for exposed and unexposed groups.

**Note:** An Explanation and Elaboration article discusses each checklist item and gives methodological background and published examples of transparent reporting. The STROBE checklist is best used in conjunction with this article (freely available on the Web sites of PLoS Medicine at <http://www.plosmedicine.org/>, Annals of Internal Medicine at <http://www.annals.org/>, and Epidemiology at <http://www.epidem.com/>). Information on the STROBE Initiative is available at [www.strobe-statement.org](http://www.strobe-statement.org).

# BMJ Open

**Trends of blood pressure, raised blood pressure, hypertension and its control among Italian adults: CUORE Project cross-sectional health examination surveys 1998/2008/2018**

|                                 |                                                                                                                                                                                                                                                                                                                                                                                                                                                                                                                                                                                                                                                                                                                                                                                                                                                                                                                                                                                                                                                                                                                                                                                                                                                                                                                                                                                                                                                                                                                      |
|---------------------------------|----------------------------------------------------------------------------------------------------------------------------------------------------------------------------------------------------------------------------------------------------------------------------------------------------------------------------------------------------------------------------------------------------------------------------------------------------------------------------------------------------------------------------------------------------------------------------------------------------------------------------------------------------------------------------------------------------------------------------------------------------------------------------------------------------------------------------------------------------------------------------------------------------------------------------------------------------------------------------------------------------------------------------------------------------------------------------------------------------------------------------------------------------------------------------------------------------------------------------------------------------------------------------------------------------------------------------------------------------------------------------------------------------------------------------------------------------------------------------------------------------------------------|
| Journal:                        | <i>BMJ Open</i>                                                                                                                                                                                                                                                                                                                                                                                                                                                                                                                                                                                                                                                                                                                                                                                                                                                                                                                                                                                                                                                                                                                                                                                                                                                                                                                                                                                                                                                                                                      |
| Manuscript ID                   | bmjopen-2022-064270.R1                                                                                                                                                                                                                                                                                                                                                                                                                                                                                                                                                                                                                                                                                                                                                                                                                                                                                                                                                                                                                                                                                                                                                                                                                                                                                                                                                                                                                                                                                               |
| Article Type:                   | Original research                                                                                                                                                                                                                                                                                                                                                                                                                                                                                                                                                                                                                                                                                                                                                                                                                                                                                                                                                                                                                                                                                                                                                                                                                                                                                                                                                                                                                                                                                                    |
| Date Submitted by the Author:   | 13-Sep-2022                                                                                                                                                                                                                                                                                                                                                                                                                                                                                                                                                                                                                                                                                                                                                                                                                                                                                                                                                                                                                                                                                                                                                                                                                                                                                                                                                                                                                                                                                                          |
| Complete List of Authors:       | <p>Donfrancesco, Chiara; Istituto Superiore di Sanità, Department of Cardiovascular, Endocrine-metabolic Diseases and Aging</p> <p>Di Lonardo, Anna; Istituto Superiore di Sanita, Department of Cardiovascular, Endocrine-metabolic Diseases and Aging</p> <p>Lo Noce, Cinzia; Istituto Superiore di Sanita', Department of Cardiovascular, Endocrine-metabolic Diseases and Aging</p> <p>Buttari, Brigitta; Istituto Superiore di Sanita', Department of Cardiovascular, Endocrine-metabolic Diseases and Aging</p> <p>Profumo, Elisabetta; Istituto Superiore di Sanita', Department of Cardiovascular, Endocrine-metabolic Diseases and Aging</p> <p>Vespasiano, Francesca; Istituto Superiore di Sanita', National Transplant Center</p> <p>Vannucchi, Serena; Istituto Superiore di Sanita', Department of Cardiovascular, Endocrine-metabolic Diseases and Aging</p> <p>Galletti, Ferruccio; Federico II University , Dept. Clinical Medicine and Surgery</p> <p>Onder, Graziano; Istituto Superiore di Sanità, Department of Cardiovascular, Endocrine-metabolic Diseases and Aging</p> <p>Gulizia, Michele ; National Enterprise of National Relevance and High Specialization "Garibaldi-Nesima Hospital", Catania, Italy; Heart Care Foundation, Florence, Italy</p> <p>Galeone, Daniela; Italian Ministry of Health</p> <p>Bellisario, Paolo; Italian Ministry of Health</p> <p>Palmieri, Luigi; Istituto Superiore di Sanita', Department of Cardiovascular, Endocrine-metabolic Diseases and Aging</p> |
| <b>Primary Subject Heading</b>: | Epidemiology                                                                                                                                                                                                                                                                                                                                                                                                                                                                                                                                                                                                                                                                                                                                                                                                                                                                                                                                                                                                                                                                                                                                                                                                                                                                                                                                                                                                                                                                                                         |
| Secondary Subject Heading:      | Public health                                                                                                                                                                                                                                                                                                                                                                                                                                                                                                                                                                                                                                                                                                                                                                                                                                                                                                                                                                                                                                                                                                                                                                                                                                                                                                                                                                                                                                                                                                        |
| Keywords:                       | Epidemiology < TROPICAL MEDICINE, Hypertension < CARDIOLOGY, PUBLIC HEALTH                                                                                                                                                                                                                                                                                                                                                                                                                                                                                                                                                                                                                                                                                                                                                                                                                                                                                                                                                                                                                                                                                                                                                                                                                                                                                                                                                                                                                                           |
|                                 |                                                                                                                                                                                                                                                                                                                                                                                                                                                                                                                                                                                                                                                                                                                                                                                                                                                                                                                                                                                                                                                                                                                                                                                                                                                                                                                                                                                                                                                                                                                      |

1  
2  
3  
4  
5  
6  
7  
8  
9  
10  
11  
12  
13  
14  
15  
16  
17  
18  
19  
20  
21  
22  
23  
24  
25  
26  
27  
28  
29  
30  
31  
32  
33  
34  
35  
36  
37  
38  
39  
40  
41  
42  
43  
44  
45  
46  
47  
48  
49  
50  
51  
52  
53  
54  
55  
56  
57  
58  
59  
60

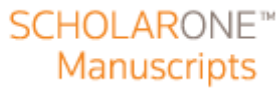





I, the Submitting Author has the right to grant and does grant on behalf of all authors of the Work (as defined in the below author licence), an exclusive licence and/or a non-exclusive licence for contributions from authors who are: i) UK Crown employees; ii) where BMJ has agreed a CC-BY licence shall apply, and/or iii) in accordance with the terms applicable for US Federal Government officers or employees acting as part of their official duties; on a worldwide, perpetual, irrevocable, royalty-free basis to BMJ Publishing Group Ltd ("BMJ") its licensees and where the relevant Journal is co-owned by BMJ to the co-owners of the Journal, to publish the Work in this journal and any other BMJ products and to exploit all rights, as set out in our [licence](#).

The Submitting Author accepts and understands that any supply made under these terms is made by BMJ to the Submitting Author unless you are acting as an employee on behalf of your employer or a postgraduate student of an affiliated institution which is paying any applicable article publishing charge ("APC") for Open Access articles. Where the Submitting Author wishes to make the Work available on an Open Access basis (and intends to pay the relevant APC), the terms of reuse of such Open Access shall be governed by a Creative Commons licence – details of these licences and which [Creative Commons](#) licence will apply to this Work are set out in our licence referred to above.

Other than as permitted in any relevant BMJ Author's Self Archiving Policies, I confirm this Work has not been accepted for publication elsewhere, is not being considered for publication elsewhere and does not duplicate material already published. I confirm all authors consent to publication of this Work and authorise the granting of this licence.

1  
2  
3 **Trends of blood pressure, raised blood pressure, hypertension and its control**  
4 **among Italian adults: CUORE Project cross-sectional health examination surveys**  
5 **1998/2008/2018**  
6  
7  
8  
9

10 **Trends of blood pressure in Italian adults**  
11  
12  
13  
14

15 Chiara Donfrancesco <sup>1</sup>, Anna Di Lonardo<sup>1</sup>, Cinzia Lo Noce <sup>1</sup>, Brigitta Buttari <sup>1</sup>, Elisabetta Profumo <sup>1</sup>,  
16 Francesca Vespasiano <sup>1</sup>, Serena Vannucchi <sup>1</sup>, Ferruccio Galletti <sup>2</sup>, Graziano Onder <sup>1</sup>, Michele Massimo  
17 Gulizia <sup>3,4</sup>, Daniela Galeone <sup>5</sup>, Paolo Bellisario <sup>5</sup> and Luigi Palmieri <sup>1</sup>.  
18  
19

20 <sup>1</sup>Istituto Superiore di Sanità, Rome, Italy

21 <sup>2</sup>Federico II University of Naples Medical School, Naples, Italy

22 <sup>3</sup> National Enterprise of National Relevance and High Specialization “Garibaldi-Nesima Hospital”,  
23 Catania, Italy

24 <sup>4</sup>Heart Care Foundation, Florence, Italy

25 <sup>5</sup>Italian Ministry of Health, Rome, Italy  
26  
27  
28  
29

30 **Corresponding author:**

31 Chiara Donfrancesco, MSc, PhD

32 Department of Cardiovascular, Endocrine-metabolic Diseases and Aging

33 Istituto Superiore di Sanità

34 Via Giano della Bella 34 – 00161 Rome, Italy

35 chiara.donfrancesco@iss.it  
36  
37  
38  
39  
40  
41  
42  
43  
44

45 **Word count:** 4735  
46  
47  
48  
49  
50  
51  
52  
53  
54  
55  
56  
57  
58  
59  
60

## Abstract

**Objectives:** To assess in the Italian general adult population trends of blood pressure (BP) and prevalence of raised blood pressure (RBP), hypertension and its control in order to evaluate population health and care, and the achievement of a RBP 25% relative reduction as recommended by the WHO at population level.

**Design:** Results comparison of health examination surveys, cross-sectional observational studies based on health examination of randomly selected age and sex stratified samples including resident aged 35-74 years. Data of 2018/2019 survey were compared with the previous ones collected in 1998/2002 and 2008/2012.

**Setting:** Health examination surveys conducted in Italy within the CUORE Project following standardized methodologies.

**Participants:** 2985 men and 2955 women examined in 1998/2002, 2218 men and 2204 women examined in 2008/2012, 1031 men and 1066 women examined in 2018/2019.

**Primary and secondary outcome measures:** Age-standardized mean of BP, prevalence of RBP (systolic BP and/or diastolic BP  $\geq$  140/90 mmHg), hypertension (presenting or being treated for RBP) and its awareness and control, according to sex, age class and educational level.

**Results:** In 2018/2019, a significant reduction was observed in systolic BP and diastolic BP in men (1998/2002: 136/86; 2008/2012: 132/84; 2018/2019: 132/78 mmHg) and women (132/82, 126/78, 122/73 mmHg), and in the prevalence of RBP (50%, 40% and 30% in men, 39%, 25%, and 16% in women) and of hypertension (54%, 49% and 44% in men, 45%, 35% and 32% in women). Trends were consistent by age and education attainment. In 2018/2019, hypertensive men and women with controlled BP were only 27% and 41%, but a significant favorable trend was observed.

**Conclusions:** Data from 2018/2019 underlined that RBP is still commonly observed in the Italian population aged 35-74 years, however, the WHO RBP target at that time may be considered met.

**Word count: 292**

**Keywords:** epidemiology, blood pressure, raised blood pressure, hypertension, health examination survey.

1  
2  
3  
4  
5  
6  
7  
8  
9  
10  
11  
12  
13  
14  
15  
16  
17  
18  
19  
20  
21  
22  
23  
24  
25  
26  
27  
28  
29  
30  
31  
32  
33  
34  
35  
36  
37  
38  
39  
40  
41  
42  
43  
44  
45  
46  
47  
48  
49  
50  
51  
52  
53  
54  
55  
56  
57  
58  
59  
60

### Strengths and limitations of this study

- Use of blood pressure measurements to estimate mean of blood pressure and the prevalence of raised blood pressure and hypertension.
- Recruitment of randomly selected age and sex specific samples of residents in 10 Italian Regions with coverage of the Northern, Central and Southern Italian territory.
- Adoption of standardized procedures and methods to collect data in the three health examination surveys.
- Assessment of blood pressure indicators by sex, age-classes and educational levels.
- Inadequacy of blood pressure measurement in a single day for the diagnosis of raised blood pressure and hypertension.

For peer review only

## INTRODUCTION

Raised blood pressure (BP) is a condition constituting a leading cause of premature death and disability worldwide, since it significantly increases the risk of heart attack, stroke, kidney failure, dementia and blindness [1]. The main contributors to raised BP are unhealthy eating behaviours – among which sodium excess – physical inactivity, excess of weight, smoking habit, harmful use of alcohol and exposure to persistent stress [2].

The value of blood pressure, in particular of systolic blood pressure (SBP), is included in the risk charts for estimating the probability of incurring or dying from a cardiovascular event, both for the strong etiological significance and for its simplicity and low cost [3-5].

To combat global mortality from non-communicable diseases (NCDs), at the Sixty-sixth World Health Assembly in 2013 Member States developed a Global Plan of Action, for 2013-2020 setting global targets that include achieving a 25% relative reduction in the prevalence of raised BP or contain the prevalence of raised BP, according to national circumstances by 2025, proposed to leading a 33% of relative reduction by 2030, using 2010 as a baseline [6,7]. The World Health Organization (WHO) is supporting countries to meet this global target and to reduce hypertension as part of WHO's Thirteenth General Programme of Work (2019–2023), which focuses on measurable impacts on people's health at country level.

In the Italian adult population, within regional studies using several methodologies and definitions, high prevalence of raised BP was found since the 70's and the 80's when it resulted just over 50% for those aged 35-69 years [8-12].

Integrated NCDs programmes implemented through a primary health care approach are an affordable and sustainable way for countries to tackle hypertension. In Italy, the prevention of NCDs is supported by the "Gaining Health: making healthy choices easy" Programme and the National Preventive Plans (NPPs), which were implemented in a context in which NCDs were estimated to account for 91% of all deaths in the period 2000-2016 [13], with a decreasing trend of premature death since 2000 to 2016 for both men and women aged between 30 and 70 years.

WHO recommended improving country-level surveillance and monitoring as a top priority in the fight against NCDs, also providing data disaggregated by age, gender, and socioeconomic groups [14, 15]. Monitoring should provide internationally comparable assessments of the trends in NCDs and related risk factors over time, help to benchmark the situation in individual countries versus others in the same region or development category, provide a foundation for advocacy, policy development and coordinated action [14]. Age-standardized prevalence of raised BP among adults and mean systolic BP are among the 25 indicators suggested by the WHO in order to monitor global and national progress in the prevention and control of NCDs. [15]

This study aimed to assess temporal trends for mean values of BP and heart rate measurements, and for prevalence of raised BP, hypertension, awareness and control of hypertension in the Italian population aged 35–74 years, according to sex, age class, educational level, and Region using data measured within the CUORE Project national health examination surveys (HESs) 1998–2002, 2008–2012, and 2018–2019.

## METHODS

### Study design

Three HESs were conducted in Italy within the CUORE Project. The first survey was conducted from May 1998 to December 2002 in all Italian Regions, enrolling a random sample of 100 men and 100 women aged 35–74 years for every 1.5 million inhabitants (participation rate 50%). The second

1  
2  
3 survey was conducted from March 2008 to July 2012, investigating a random sample of 110 men  
4 and 110 women aged 35–79 years for every 1.5 million residents in all Italian Regions (participation  
5 rate 53%). The third survey was conducted from April 2018 to December 2019, in 10 Regions (out  
6 of 20) chosen in the North, Central, and South Italy, using a random sample of 100 men and 100  
7 women aged 35–74 years in each examined Region (participation rate 40%). Within the three HESs,  
8 probability samples included persons randomly selected from resident registries through  
9 stratification by sex and age group (35–44, 45–54, 55–64, 65–74, 75–79).

10  
11 The three HESs were conducted by the Italian National Institute of Health (Istituto Superiore di  
12 Sanità-ISS); the first and second surveys in collaboration with the national scientific association of  
13 hospital cardiologists (ANMCO–Associazione Nazionale Medici Cardiologi Ospedalieri) and its  
14 foundation (Fondazione per il Tuo cuore - Heart Care Foundation). Surveys details were published  
15 elsewhere [16-19]. The three HESs were approved by the Ethical Committee of the ISS; all  
16 participants received an informative note and signed an informed consent. The three HESs are  
17 recognized within the Italian National Statistical Program. The second and third surveys were also  
18 recognized within the European HES collaboration [20, 21].  
19  
20  
21  
22  
23  
24

## 25 **Study procedures and methods**

26  
27 The CUORE Project HESs used international standardized procedures and methods for the data  
28 collection and measurements [16-19].

29  
30 BP measurements were performed applying the appropriate cuff to the right arm, while the  
31 participant was in a sitting position after 5 minutes at rest. During the 1998-2002 and 2008-2012  
32 HES, SBP and DBP were identified at the beginning of the first and fifth phase of the Korotkoff sounds  
33 using a mercury sphygmomanometer; during the 2018-2019 HES an oscillometric device (Omron  
34 HEM-907) was used. Two consecutive readings were recorded in the first survey and three  
35 consecutive readings were recorded in the second and third survey, one minute apart. Heart rate  
36 was measured at the wrist between the first and the second measurements; it was measured at the  
37 right wrist by placing the middle fingers of the left hand on it to locate the radial artery - when a  
38 pulse was found, the number of beats felt within a one-minute period was counted using a stop  
39 watch as a time references. The presence of a previous diagnosis of hypertension was collected by  
40 a standardized questionnaire, as well as information on pharmacological treatment; the first was  
41 investigated by asking if any doctor or other healthcare operator had previously indicated that the  
42 blood pressure was high, the second by asking if in the last two weeks they had taken medications  
43 prescribed by a doctor to lower blood pressure and by checking the boxes of the drugs being used.  
44  
45  
46  
47  
48  
49

## 50 **Patient and Public Involvement**

51 It was not appropriate or possible to involve patients or the public in the design, or conduct, or  
52 reporting, or dissemination plans of our research.  
53  
54  
55  
56  
57  
58  
59  
60

## Statistical analysis

The statistical comparison of the 1998–2002, 2008–2012, and 2018–2019 CUORE Project HESs data included 35- to 74-year-old residents in 10 Regions, distributed in north, central, and south Italy, involved in all the surveys: Piedmont, Lombardy, Liguria, Emilia Romagna, Tuscany, Lazio, Abruzzo, Basilicata, Calabria, and Sicily.

The average of the first and second BP measurement was used for the statistical analysis. As suggested by the WHO, raised blood pressure was defined as SBP  $\geq$ 140 mmHg and/or DBP  $\geq$ 90 mmHg [6, 15]. Hypertensives were defined as those with SBP $\geq$ 140 mmHg and/or DBP $\geq$ 90 mmHg or under specific pharmacological treatment and were divided into groups of “undiagnosed”, “diagnosed but untreated”, “uncontrolled” (treated and SBP $\geq$  140 mmHg and/or DBP $\geq$  90 mmHg) and “controlled” (treated and SBP $<$ 140 mmHg and DBP $<$ 90 mmHg). The European Society of Cardiology (ESC) and the European Society of Hypertension (ESH) also consider these cut off values of RBP and hypertension [22].

Educational level was selected as a proxy of socio-economic level; social class was dichotomized as those with primary/middle school attainment ( $\leq$ 8 years, lower education) and high school/university degree ( $>$ 8 years, higher education).

Mean, standard deviation (SD), and 95% confidence interval of SBP, DBP (in all participants and in those not under treatment for hypertension) and heart rate, as well as prevalence and 95% confidence interval of raised BP, hypertension and its awareness and control were assessed by sex, age group (35–44, 45–54, 55–64, and 65–74 years), and periods and, for those with available information, by educational level.

Following the suggestion reported in the WHO Global NCDs Action Plan 2013–2020 [6, 10], indicators, where appropriate, were age standardized using the direct method, referring to the age- and sex-specific distributions of the Italian adult population in 2000, 2010, and 2019 (Italian National Institute of Statistics-ISTAT), for the 1998–2002, 2008–2012, and 2018–2019 HESs respectively [23]. Data were also age standardized using the European Standard Population (EuStPop) 2013 for international comparisons [24].

Indicators assessed in the most recent period, 2018–2019, were compared with those of previous periods, 1998–2002 and 2008–2012. The associations between indicators and age class and educational level were also assessed within periods. Regarding continuous indicators, a t-test was used to compare indicators means between periods, and analysis of variance was used to compare them within periods by age class and educational level. Regarding categorical indicators, the chi-square test was used to compare prevalence indicators between periods and, within periods, by age class and educational level. Comparisons of indicators between periods were also conducted, adjusting by age and educational level, using linear (for continuous indicators) and logistic (for categorical indicators) regression models, considering indicators as dependent variables, and period (2018–2019/1998–2002 or 2018–2019/2008–2012), age (35–54/55–74 years) and educational level (high/low) as independent variables; the statistical significance of the period was reported in tables. Two-sided p-values  $<$ 0.05 were considered statistically significant. Statistical analyses were performed using SAS software, release 9.4.

## RESULTS

After the exclusions of persons with missing data for SBP or DBP or use of specific drug treatments (8 persons in 1998, 18 in 2008 and 9 in 2018), 2985 men and 2955 women (mean age  $\pm$  SD: men 55  $\pm$  11, women 54  $\pm$  11), 2218 men and 2204 women (mean age  $\pm$  SD: men 55  $\pm$  11, women 55  $\pm$  11),



1  
2  
3  
4  
5  
6  
7  
8  
9  
10  
11  
12  
13  
14  
15  
16  
17  
18  
19  
20  
21  
22  
23  
24  
25  
26  
27  
28  
29  
30  
31  
32  
33  
34  
35  
36  
37  
38  
39  
40  
41  
42  
43  
44  
45  
46  
47  
48  
49  
50  
51  
52  
53  
54  
55  
56  
57  
58  
59  
60

and 1031 men and 1066 women (mean age  $\pm$  SD: men  $55 \pm 11$ , women  $55 \pm 11$ ) were included in the analysis of the 1998–2002, 2008–2012, and 2018–2019 HESs, respectively (S1 Table).

## Blood pressure and heart rate measurements

The evaluation of the temporal trend of the mean BP shows in the period 2018–2019 as compared to twenty years before a significant reduction in SBP and DBP in both men (132/78 mmHg in 2018–2019 with a 3% of reduction for SBP, 10% for DBP) and women (122/73 mmHg, with a reduction of 7% and 11% respectively), while in the period 2018–2019 compared to ten years earlier, a reduction in mean SBP is observed only in women (3%), being stable in men, and in mean DBP both in men and women (7%) (Table 1). Similar trends are also observed for those not under antihypertensive drugs, and by age groups and education level (Tables 1, S2, S3, S4 and S5, Figures 1 and 2).

Within the 1998, 2008, and 2018 periods, mean SBP and DBP was higher in men than in women, regardless of antihypertensive drug treatment use, class of age and educational level, although not always statistically significant, especially in the 1998–2002 period considering that the difference increased progressively over time, passing from 3% in 1998–2002 to 4% in 2008–2012 until it reached 8% in 2018–2019 (Tables 1, S2, S3, S4, and S5, Figures 1 and 2). Within those periods, in both men and women, mean SBP and DBP, regardless of antihypertensive drug treatment use, progressively increased by age group and was tendentially higher in those with a lower level of education, except DBP in men (Tables S2, S3, S4, and S5). The mean SBP difference between educational levels increased progressively in the 1998, 2008, and 2018 periods in both men and women (men: 2%, 3%, and 4%; women: 7%, 8%, and 12%) (Table S4 and S5, Figures 1 and 2).

The mean heart rate was progressively increasing in the three surveys periods, both in men and women, in all age groups and education levels, remaining between 66 and 74 beats per minute. Within the 1998, 2008, and 2018 periods, no significant differences are observed in the mean heart rate by age group, with the exception of women in 1998–2002 for whom it decreases starting from 55 years; there are no differences between levels of education with the exception of men in 2018–2019 for whom there is an average level of heart rate higher in the lowest level of education.

**Table 1. Age-standardized blood pressure and heart rate measurements and prevalence of blood pressure treatment, raised blood pressure, hypertension and state of hypertension control by sex and period. Men and women residing in Italy aged 35-74 years, The CUORE Project Surveys 1998-2002, 2008-2012 and 2018-2019.**

|                                              | MEN        |        |         |            |        |         |            |        |         |                        |                               |                               |                        |                               |                               |
|----------------------------------------------|------------|--------|---------|------------|--------|---------|------------|--------|---------|------------------------|-------------------------------|-------------------------------|------------------------|-------------------------------|-------------------------------|
|                                              | 1998-2002  |        |         | 2008-2012  |        |         | 2018-2019  |        |         | 2018-2019 vs 1998-2002 |                               |                               | 2018-2019 vs 2008-2012 |                               |                               |
|                                              | n=2985     |        |         | n=2218     |        |         | n=1031     |        |         | Diff                   | t-test sign <sup>^</sup>      | Regression sign <sup>^^</sup> | Diff                   | t-test sign <sup>^</sup>      | Regression sign <sup>^^</sup> |
|                                              | mean       | SD     | 95% CI  | mean       | SD     | 95% CI  | mean       | SD     | 95% CI  | Diff                   | t-test sign <sup>^</sup>      | Regression sign <sup>^^</sup> | Diff                   | t-test sign <sup>^</sup>      | Regression sign <sup>^^</sup> |
| <b>Systolic blood pressure - SBP (mmHg)</b>  | <b>136</b> | 18     | 135 136 | <b>132</b> | 16     | 131 132 | <b>132</b> | 14     | 131 132 | <b>-4</b>              | ***                           | ***                           | <b>-0,3</b>            | ns                            | ns                            |
| <b>Diastolic blood pressure - DBP (mmHg)</b> | <b>86</b>  | 11     | 86 87   | <b>84</b>  | 10     | 83 84   | <b>78</b>  | 10     | 77 78   | <b>-9</b>              | ***                           | ***                           | <b>-6</b>              | ***                           | ***                           |
| <b>SBP not under drug treatment (mmHg)</b>   | <b>134</b> | 17     | 133 134 | <b>130</b> | 15     | 129 131 | <b>131</b> | 14     | 130 132 | <b>-3</b>              | ***                           | **                            | <b>1</b>               | ns                            | ns                            |
| <b>DBP not under drug treatment (mmHg)</b>   | <b>85</b>  | 10     | 85 86   | <b>83</b>  | 10     | 83 84   | <b>77</b>  | 10     | 76 78   | <b>-9</b>              | ***                           | ***                           | <b>-6</b>              | ***                           | ***                           |
| <b>Heart rate (beats per minute)</b>         | <b>66</b>  | 11     | 66 66   | <b>68</b>  | 10     | 68 69   | <b>72</b>  | 12     | 71 72   | <b>6</b>               | ***                           | ***                           | <b>3</b>               | ***                           | ***                           |
|                                              | %          | 95% CI |         | %          | 95% CI |         | %          | 95% CI |         | Diff                   | chi-squared sign <sup>^</sup> | Logistic sign <sup>^^</sup>   | Diff                   | chi-squared sign <sup>^</sup> | Logistic sign <sup>^^</sup>   |
| <b>Blood pressure drug treatment</b>         | <b>19</b>  | 17     | 20      | <b>24</b>  | 22     | 26      | <b>25</b>  | 23     | 28      | <b>7</b>               | ***                           | ***                           | <b>1</b>               | ns                            | ns                            |
| <b>Raised blood pressure</b>                 | <b>50</b>  | 48     | 52      | <b>40</b>  | 38     | 42      | <b>30</b>  | 27     | 32      | <b>-20</b>             | ***                           | ***                           | <b>-10</b>             | ***                           | ***                           |
| <b>Hypertension</b>                          | <b>54</b>  | 52     | 55      | <b>49</b>  | 47     | 52      | <b>44</b>  | 41     | 47      | <b>-9</b>              | ***                           | ***                           | <b>-5</b>              | **                            | **                            |
| <b>Hypertension</b>                          |            |        |         |            |        |         |            |        |         |                        |                               |                               |                        |                               |                               |
| <i>Undiagnosed</i>                           | <b>53</b>  | 51     | 56      | <b>40</b>  | 37     | 42      | <b>36</b>  | 32     | 41      | <b>-17</b>             | ***                           | ***                           | <b>-3</b>              | ns                            | ns                            |
| <i>Diagnosed but untreated</i>               | <b>15</b>  | 14     | 17      | <b>19</b>  | 16     | 21      | <b>14</b>  | 11     | 18      | <b>-1</b>              | ns                            | ns                            | <b>-4</b>              | *                             | ns                            |
| <i>Uncontrolled</i>                          | <b>25</b>  | 23     | 27      | <b>25</b>  | 22     | 27      | <b>22</b>  | 19     | 26      | <b>-2</b>              | ns                            | **                            | <b>-2</b>              | ns                            | *                             |
| <i>Controlled</i>                            | <b>6</b>   | 5      | 8       | <b>17</b>  | 15     | 19      | <b>27</b>  | 23     | 31      | <b>20</b>              | ***                           | ***                           | <b>10</b>              | ***                           | ***                           |

|                                       | WOMEN          |        |        |     |                |    |        |        |                |      |                               |                             |                        |                               |                               |                        |                          |                               |
|---------------------------------------|----------------|--------|--------|-----|----------------|----|--------|--------|----------------|------|-------------------------------|-----------------------------|------------------------|-------------------------------|-------------------------------|------------------------|--------------------------|-------------------------------|
|                                       | 1998-2002      |        |        |     | 2008-2012      |    |        |        | 2018-2019      |      |                               |                             | 2018-2019 vs 1998-2002 |                               |                               | 2018-2019 vs 2008-2012 |                          |                               |
|                                       | <i>n</i> =2955 |        |        |     | <i>n</i> =2204 |    |        |        | <i>n</i> =1066 |      |                               |                             | Diff                   | t-test sign <sup>^</sup>      | Regression sign <sup>^^</sup> | Diff                   | t-test sign <sup>^</sup> | Regression sign <sup>^^</sup> |
|                                       | mean           | SD     | 95% CI |     | mean           | SD | 95% CI |        | mean           | SD   | 95% CI                        |                             |                        |                               |                               |                        |                          |                               |
| Systolic blood pressure - SBP (mmHg)  | 132            | 18     | 131    | 132 | 126            | 16 | 125    | 127    | 122            | 16   | 121                           | 123                         | -10                    | ***                           | ***                           | -4                     | ***                      | ***                           |
| Diastolic blood pressure - DBP (mmHg) | 82             | 10     | 82     | 82  | 78             | 9  | 78     | 79     | 73             | 11   | 72                            | 74                          | -9                     | ***                           | ***                           | -6                     | ***                      | ***                           |
| SBP not under drug treatment (mmHg)   | 129            | 16     | 128    | 129 | 124            | 15 | 123    | 124    | 120            | 15   | 119                           | 121                         | -9                     | ***                           | ***                           | -4                     | ***                      | ***                           |
| DBP not under drug treatment (mmHg)   | 81             | 10     | 80     | 81  | 78             | 9  | 77     | 78     | 72             | 10   | 71                            | 73                          | -9                     | ***                           | ***                           | -6                     | ***                      | ***                           |
| Heart rate (beats per minute)         | 70             | 11     | 69     | 70  | 71             | 9  | 71     | 71     | 73             | 10   | 72                            | 73                          | 3                      | ***                           | ***                           | 2                      | ***                      | ***                           |
|                                       | %              | 95% CI |        | %   | 95% CI         |    | %      | 95% CI |                | Diff | chi-squared sign <sup>^</sup> | Logistic sign <sup>^^</sup> | Diff                   | chi-squared sign <sup>^</sup> | Logistic sign <sup>^^</sup>   |                        |                          |                               |
| Blood pressure drug treatment         | 22             | 20     | 23     |     | 22             | 20 | 24     |        | 23             | 20   | 25                            |                             | 1                      | ns                            | **                            | 1                      | ns                       | ns                            |
| Raised blood pressure                 | 39             | 38     | 41     |     | 25             | 24 | 27     |        | 16             | 14   | 19                            |                             | -23                    | ***                           | ***                           | -9                     | ***                      | ***                           |
| Hypertension                          | 45             | 43     | 46     |     | 35             | 33 | 37     |        | 32             | 29   | 34                            |                             | -13                    | ***                           | ***                           | -4                     | *                        | ns                            |
| Hypertension                          |                |        |        |     |                |    |        |        |                |      |                               |                             |                        |                               |                               |                        |                          |                               |
| Undiagnosed                           | 44             | 42     | 47     |     | 32             | 28 | 35     |        | 28             | 23   | 32                            |                             | -17                    | ***                           | ***                           | -4                     | ns                       | **                            |
| Diagnosed but untreated               | 16             | 14     | 18     |     | 16             | 13 | 18     |        | 15             | 12   | 19                            |                             | -0,4                   | ns                            | **                            | -0,4                   | ns                       | ns                            |
| Uncontrolled                          | 30             | 27     | 32     |     | 26             | 23 | 29     |        | 16             | 13   | 20                            |                             | -13                    | ***                           | ***                           | -10                    | **                       | **                            |
| Controlled                            | 10             | 9      | 12     |     | 27             | 24 | 30     |        | 41             | 36   | 46                            |                             | 31                     | ***                           | ***                           | 14                     | ***                      | ***                           |

SD: standard deviation; CI: confidence interval; Diff: mean or percentage difference between 2018–2019 and 1998–2002 or 2018–2019 and 2008–2012; the values are approximated taking into account the first decimal of means or prevalence. Means, standard deviations, and prevalence were age-standardized by Italian National Institute of Statistics-ISTAT Italian population 2000, 2010, and 2019, respectively. ^ t-test to compare mean values between periods; chi-square test to compare prevalence between periods. ^^ Linear regression and logistic models were assessed considering indicators as dependent variable and period (2018–2019/1998–2002 or 2018–2019/2008–2012), age (35–54/55–74 years), and educational level (high/low) as independent variables; the statistical significance of the period was reported. \*\*\* p < 0.0001; \*\* p < 0.01; \*p < 0.05; ns not significant p-value. Raised blood pressure: systolic blood pressure ≥140 mmHg or diastolic blood pressure ≥90 mmHg. Hypertension: systolic blood pressure ≥140 mmHg or diastolic blood pressure ≥90 mmHg and/or under specific pharmacological treatment. Hypertension is divided into ‘undiagnosed’, ‘diagnosed but untreated’, ‘uncontrolled’ (treated and SBP≥ 140 mmHg or DBP≥ 90 mmHg) and ‘controlled’ (treated and SBP < 140 mmHg and DBP < 90 mmHg). Pool of the following Italian regions: Piedmont, Lombardy, Liguria, Emilia Romagna, Tuscany, Lazio, Abruzzo, Basilicata, Calabria, and Sicily.

1  
2  
3  
4  
5  
6  
7  
8  
9  
10  
11  
12  
13  
14  
15  
16  
17  
18  
19  
20  
21  
22  
23  
24  
25  
26  
27  
28  
29  
30  
31  
32  
33  
34  
35  
36  
37  
38  
39  
40  
41  
42  
43  
44  
45  
46

For peer review only

## Hypertension drug treatment, raised blood pressure and hypertension

The prevalence of antihypertensive drug treatment use in men showed a significant increase by 7% in 2018-2019 compared to twenty years earlier, it remained stable for men compared to ten years earlier and for women in the three survey periods (Table 1), however a significant increase was observed in 2018-2019 compared to twenty years earlier in men aged 55 years and over and women aged 65 years and over (Tables S6 and S7). The general increase in the use of antihypertensive drug treatment in men was especially observed among those with higher education level; in women, a generally stable prevalence was observed regardless of education level (Tables S8 and S9). Antihypertensive drug treatment use, was higher in men than in women, in 1998-2002, and reached, in 2018-2019, more similar values between men (25%) and women (23%).

The prevalence of raised BP was 30% in men and 16% in women in 2018-2019, significantly decreased compared to twenty and ten years earlier: in men it decreased by 20% and 10% respectively and in women 23% and 9% respectively (Table 1). The decreasing trend of raised BP was progressively higher by age classes, reaching, in 2018-2019 compared to 1998-2002, the 27% in men and 38% in women aged 65-74 years, while it was similar between educational levels both in men and women (Tables S6, S7, S8, S9, Figures 1 and 2).

The prevalence of hypertension was 44% in men and 32% in women in the 2018-2019, significantly decreased compared to twenty and ten years earlier: in men it decreased by 9% and 5% respectively and in women 13% and 4% respectively (Table 1); in men the decrease was observed among those aged 35 to 54 years both compared to twenty and ten years earlier, in women in all age groups compared to twenty years earlier, while from 55 to 74 years of age compared to the previous ten years; similar decreasing trend was observed between educational levels with a more favourable trend among more educated women (Tables S6, S7, S8 and S9, Figures 1 and 2).

As expected, within periods, both in men and women, prevalence of raised BP and hypertension significantly increased by age group and was tendentially higher in those with a lower level of education (Tables S6, S7, S8, S9, Figures 1 and 2). Prevalence of raised BP and hypertension decreased or remained stable in all Italian Regions both in men and women (Figures 3 and 4, and Table S10).

## Awareness and control of hypertension

In 2018-2019, prevalence of undiagnosed hypertension resulted in 36% and 28% of hypertensive men and women, with a decreasing trend of 17% in comparison with twenty years earlier both in men and women and 3-4 % in comparison with ten years earlier (Table 1); these trends were found in particular in those aged 45 years and over and were similar by educational level, with some advantage in women with higher education (Tables S6, S7, S8 and S9). Within periods, both in men and women, prevalence of undiagnosed hypertension was higher among younger men and women but similar between educational levels (Tables S6, S7, S8 and S9).

Prevalence of not controlled hypertension was found to be halved in women, from 30% of 1998-2002 to 16% in 2018-2019 (Table 1); favorable, but much more contained, trend was found in men with a reduction of 2% (Table 1). Within periods, both in men and women, prevalence of uncontrolled hypertension was found increasing by age classes and tendentially higher in those with lower educational level (Tables S6, S7, S8 and S9).

Although in 2018-2019 only 27% of hypertensive men and 41% of hypertensive women had their blood pressure under control, a positive growth trend of hypertension under control was observed both in men and women, with an increase in 2018-2019, compared to 20 years earlier, of 20% in men and 31% in women (10% and 14 % respectively compared to ten years earlier) (Table 1). An

1  
2  
3 important increase was observed in men from the age of 55 years and in women in all age groups;  
4 similar trend for more or less educated men, while a more favorable trend is observed among more  
5 educated women (Tables S6, S7, S8 and S9, Figures 1 and 2). In 2008-2012 and 2018-2019, in men,  
6 prevalence of controlled hypertension increases by age classes (in women only in the last survey),  
7 and in the latter two surveys it is higher in men with higher education level (Tables S6, S7, S8 and  
8 S9).  
9

10  
11 Results, age standardized according to the European standard population 2013, are available in  
12 Tables S11, S12, S13, S14 and S15.  
13  
14

## 15 16 **DISCUSSION**

17  
18 Data of measured BP in random samples of the general Italian population aged 35–74 years during  
19 three HESs conducted in 1998–2002, 2008–2012, and 2018–2019, showed a significant reduction,  
20 in 2018-2019 compared to twenty years earlier, of SBP and DBP mean levels and prevalence of  
21 raised BP and hypertension. The reductions were consistent with respect to sex, age classes and  
22 education level and were detected to different extents in almost all Italian Regions. This favorable  
23 decline in mean blood pressure and in the prevalence of raised BP and hypertension was observed  
24 in 2018-2019 even when compared with ten years earlier, except for mean SBP in men which was  
25 stable. Although around 7 out of 10 men and 6 out of 10 women with raised BP still in 2018-2019  
26 did not have their blood pressure under control (because it is not diagnosed, diagnosed but not  
27 treated or treated but not under control), an important increase in raised BP control was observed  
28 in 2018-2019 compared to twenty years earlier, for men mostly due to a decrease in the prevalence  
29 of undiagnosed high blood pressure and for women also due to a reduction in the prevalence of  
30 uncontrolled RBP.  
31  
32

33  
34 These results, which to our knowledge are based on the most recent national measured data on  
35 Italian general adult population, responds to the WHO's request to provide information on  
36 effectiveness of national policies and strategies, showing, in relation to the objective indicated in  
37 the Global Action Plan 2013-2020 (25% relative reduction in the prevalence of raised BP or  
38 containment of the prevalence of raised BP by 2025, proposed leading to a 33% of relative reduction  
39 by 2030), a significant decline from 1998-2020 to 2018-2019 in the prevalence of raised BP, from  
40 50% to 30% in men and from 39% to 16% in women, equal to a relative reduction of 41% and 58%  
41 respectively, and also a significant decline from 2008-2012 to 2018-2019, from 40% to 30% in men  
42 and from 25% to 16% in women, equal to a relative reduction of 25% and 36% respectively [6].  
43  
44

45  
46 Mean values of SBP and DBP, as well as prevalence of raised blood pressure trends are consistent  
47 with those of other studies conducted in the Italian adult population. NCD Risk Factor Collaboration,  
48 that pooled data of population-based studies with measured blood pressure in adults aged 18 years  
49 and older from 200 countries, showed that within the 36 Italian surveys (at community, subnational,  
50 and national levels, including the CUORE Project surveys 1998–2002 and 2008–2012), mean values  
51 of SBP and DBP, as well as prevalence of RBP decreased during 1995–2015 period [25, 26].  
52  
53

54  
55 In some other European countries, such as United Kingdom, Switzerland, Spain, Sweden, Norway,  
56 Netherlands, Luxemburg, Ireland, Germany, France, Finland, Belgium and Austria, a decline of blood  
57 pressure levels was also observed with various intensities both in men and women, while in other  
58 countries, mainly from Eastern Europe, such as Slovenia, Slovakia, Serbia, Romania, Poland,  
59 Lithuania, Hungary, Greece, Czech Republic and Portugal, a trend of decline was observed in women  
60 and a stable or slightly increasing trend in men; in other countries, such as Moldova, Croatia, Bosnia

1  
2  
3  
4  
5  
6  
7  
8  
9  
10  
11  
12  
13  
14  
15  
16  
17  
18  
19  
20  
21  
22  
23  
24  
25  
26  
27  
28  
29  
30  
31  
32  
33  
34  
35  
36  
37  
38  
39  
40  
41  
42  
43  
44  
45  
46  
47  
48  
49  
50  
51  
52  
53  
54  
55  
56  
57  
58  
59  
60

and Herzegovina and Albania, a stable or an increasing trend is still ongoing both in men and women [25, 26].

High-income countries have begun to reduce hypertension in their populations through strong public health policies such as the reduction of salt content in processed food and widely available early diagnosis and treatment that tackle hypertension and other risk factors together [2, 27]. Also in Italy, an explanation of the reasons why a decrease in mean blood pressure and in the prevalence of raised blood pressure is observed in the general adult population might be on the one hand the enhancement of its early detection, treatment and control and on the other hand successful national programmes of primary prevention which have led to an increase in the normal weight prevalence and to the reduction of the daily consumption of salt in the general adult population, despite the average levels of daily potassium consumption being not yet adequate [16-18]. In the last past two decades, the "Gaining Health" Programme and NPPs in Italy were oriented to reduce risk factors associated to the increase of blood pressure, such as physical inactivity, excess of weight and salt consumption, as well as the smoking habit, through intersectional strategies at both population (e.g., facilitating the choice of correct lifestyles) and individual levels (e.g., motivational counselling and specific therapeutic groups), promoting, and supporting national surveillance systems and monitoring studies, and through voluntary agreements for salt reduction in food products, school and workplace programs, and public awareness campaigns [28]. As an example, aimed directly at the diagnosis and control of raised BP, in the NPP 2005-2008 the promotion of a multifactorial cardiovascular diseases (CVD) risk assessment, based also on BP measurements, and its monitoring over time in clinical practice has been explicitly included. As well as, NPP 2014-2019 also focused on the early identification and integrated assessment of persons with NCDs risk factors, to be directed towards an adequate systemic management, able to enhance personal resources for the conscious adoption of correct life, or when necessary, towards suitable multidisciplinary therapeutic and assistance paths.

Additional findings of the study, including higher level of blood pressure and raised BP/hypertension in men than in women and more severe values in the southern Italy Regions and tendentially in people with lower education levels, are consistent with results from other Italian and European Studies [25,26,29], and are in line with the association of excess of weight and salt consumption with gender, education level and Italian macro-area [16, 17,19, 30, 31].

As far as, the favourable trend of increase in hypertension awareness, treatment, and control is concerned, it could be due to the greater diffusion and compliance with the guidelines for hypertension in clinical practice that include simplified recommendations. In Italy, over the period of our analysis, the antihypertensive treatment was based on the guidelines drawn up by the ESC/ESH [22, 32-34] which indicated as threshold for immediate treatment BP  $\geq 180/110$  or BP of 140-179/90-109 (depending on CVD risk stratification) after lifestyle modifications, with a treatment target that has changed over time (2003: BP<140/90 mmHg; 2007: BP<140/90 mmHg and BP<130/80 mmHg in high CVD risk; 2013: BP<140/90 mmHg; 2018: DBP<80 mmHg for all and SBP 120-129 mmHg for persons aged<65 years or SBP 130-139 mmHg for persons aged $\geq 65$  years). The progressively lower thresholds for diagnosing hypertension and the beginning of treatment also may have contributed to this favourable trend based on the threshold of 140/90 mm Hg. In addition, over time, treatment efficacy and control for some patients suffering from smaller side-effects of the earliest generations of drugs improved thanks to the availability of newer drugs [35].

Early detection and treatment of raised BP and other risk factors, as well as public health policies that reduce exposure to behavioural risk factors, have contributed to the gradual decline in mortality due to heart disease and stroke in Italy and other high-income countries over the last three decades [36, 37].



## Strengths and limitations

Major strengths of this study are the following: the use of standardized procedures and methods to assess blood pressure measurements, allowing objective and reliable estimates of SBP, DBP and raised blood pressure; the checking of drug boxes to assess the use of specific pharmacological treatments; a good national coverage with the enrolment of study participants from half of the Italian regions distributed in northern, central, and southern Italy; the random selection and the sex and age classes stratification of samples from the general population.

Conversely, we acknowledge some study limitations, which should be taken in consideration when interpreting results. First, because of the choice of urban districts for the random selection of the study participants within the surveys, the results may not be representative of the habits of the population living in rural areas. The participation rates in the surveys were lower than desirable, yet consistent, with lower contact rates occurring in more highly urbanized areas and with a decreasing trend of participation observed in HESs in other European countries [38]. The cross-sectional design of the study does not allow to assess causality of the associations between SBP, DBP and raised blood pressure and educational level. There were differences in the educational level distribution between the three surveys, which is consistent with the increase of secondary and tertiary education assessed in adults from 2008 to 2017 by the Italian National Institute of Statistics [39]. The use of mercury sphygmomanometer in the 1998-2002 and 2008-2012 surveys and of an oscillometric device in the 2018-2019 survey (due to the EU regulation 847/2012 that banned the sale of mercury sphygmomanometers from 10 April 2014 onwards [40]) may affect comparison among surveys [41]; however, the oscillometric device used in HES 2018-2019 was certified according to international validation protocol to ensure that the device measures accurately in comparison with the mercury sphygmomanometer; in addition it should prevent the observer's error due to the use of a mercury sphygmomanometer, and the common standardized protocol based on aspects such as room temperature, disturbing noises, lighting, adequacy of the table and chair for the measurement, interaction between the survey participant and the measurer, availability of different cuffs may minimize variation due to measurement technique [21, 42, 43]. Anyway, with all device types, mercury and aneroid sphygmomanometers, and oscillometric devices, calibration error may bias the results [44]. Hypertension diagnosis should be based on several BP readings taken on several occasions (at least two), as recommended by international guidelines [22]; however, epidemiological studies are based on BP measurement in a single visit, possibly with two or more measurements repeated during the same visit [21, 45].

## Conclusions

BP assessment in three independent surveys on the Italian population aged 35-74 years, carried out in 10 Regions approximately 10 years apart from each other, showed a significant reduction of BP mean values and prevalence of raised BP and hypertension in 2018-2019 compared to twenty years earlier, with a favourable trend also observed compared to ten years earlier. This reduction was independent of gender, age and educational level and met the 25% target for reduction/containment of the RBP prevalence indicated in the WHO Global Action Plan 2013-2020 by 2025 with baseline 2010. Albeit in 2018-2019 underdiagnoses and non-control of elevated blood pressure was still largely prevalent in Italy, a favourable trend in the control of raised BP has been observed.

Although systematic and periodic monitoring are necessary to observe the trend and control of blood pressure in the coming years, also in relation to the direct and indirect effects of the COVID-19 pandemic, these results have major public health implications in so much as they encourage the

1  
2  
3  
4  
5  
6  
7  
8  
9  
10  
11  
12  
13  
14  
15  
16  
17  
18  
19  
20  
21  
22  
23  
24  
25  
26  
27  
28  
29  
30  
31  
32  
33  
34  
35  
36  
37  
38  
39  
40  
41  
42  
43  
44  
45  
46  
47  
48  
49  
50  
51  
52  
53  
54  
55  
56  
57  
58  
59  
60

initiatives undertaken by the Italian Ministry of Health in order to contain risk factors associated to the onset of raised BP at individual and population level through the “Gaining Health: making healthy choices easy” Programme and the NPPs. In continuity with the NPP 2014-2019, the NPP 2020-2025 renewed the commitment to the health promotion and the prevention of NCDs by providing preventive and protective interventions according to a life-course approach and aiming at the early identification and management of persons with risk factors.

Prevention and control of raised BP involve multi-stakeholder collaboration, such as governments, academia, the food and beverage industry and civil society. In view of the enormous public health benefits of BP control, some concerted action has been implemented and data demonstrate that the prevention of raised BP is today an attainable goal.

For peer review only

## Acknowledgments

Research Group of Osservatorio Epidemiologico Cardiovascolare/Health Examination Survey (OEC/HES) 1998-2002 and 2008-2012 within the CUORE Project for the National Institute of Health (Istituto Superiore di Sanità) ISS: Luigi Palmieri (coordinator), Chiara Donfrancesco (coordinator), Simona Giampaoli (former coordinator), Cinzia Lo Noce, Serena Vannucchi, Anna Di Lonardo, Francesco Dima (former). Research group of the CUORE Project OEC/HES 1998-2002 and 2008-2012 for Associazione Nazionale Medici Cardiologi Ospedalieri/Health Care Foundation (ANMCO/HCF): Michele Massimo Gulizia, Furio Colivicchi and Andrea Di Lenarda (coordinators), Diego Vanuzzo (former coordinator), Domenico Gabrielli, Giuseppe Di Pasquale, Aldo Pietro Maggioni, Gian Francesco Mureddu, Carmine Riccio, Marino Scherillo, Stefano Urbinati, Pompilio Faggiano.

Research Group of the Health Examination Survey (HES) 2018-2019 within the CUORE Project: Chiara Donfrancesco (coordinator), Luigi Palmieri, Cinzia Lo Noce, Anna Di Lonardo, Elisabetta Profumo, Brigitta Buttari, Serena Vannucchi, Simona Giampaoli (former coordinator) (Italian National Institute Health -Istituto Superiore di Sanità, ISS).

Local coordinators of the OEC 1998-2002 participating centers: V. Martinelli (Ospedale Civile S.S. Antonio E Biagio, Alessandria); M. Vona, M.A. (Ospedale Generale Regionale, Aosta); M.L. Biorci (Divisione Di Cardiologia, Ospedale La Colletta, Arenzano); G. Gullace, (Ospedale Umberto I, Bellano); F. Tettamanti, (Azienda Ospedaliera Sant'anna, Como); F. Avanzini, (Servizio Di Cardiologia, Ospedale Di Circolo, Desio); D. Mazzoleni, (Ospedali Riuniti, Mozzo); I. Pastine, M.N. (Asl 4, Rapallo); A. Pizzuti, M.A. ( Ospedale Maggiore S.S. Annunziata, Savigliano); G. Cucchi (Ospedale Civile, Sondrio); M.G. Scavo, (Centro Traumatologico Ortopedico, Torino); R. Pedretti, (Fondazione S. Maugeri Irccs, Tradate); F. Soffiantino, (Fondazione S. Maugeri Irccs, Veruno); D. Girardini, (Ospedale Civile, Ala); A. Pozzati, (Ospedale Di Bentivoglio); S. Boni, (Ospedale Civile San Biagio, Bovolone); G. Candelpergher, (Stabilimento Ospedaliero Castelfranco Veneto); E. Cremaschi, (Ospedale Civile, Guastalla); C.A. Goldoni, (Ospedale S. Agostino, Modena); F. Cioppi, (Ospedale Degli Infermi, Rimini); L. Roncon, (Presidio Ospedaliero, Rovigo); G. Zanata, (Ospedale Civile, Sacile); P. Spolaore, (Ospedale Civile, Vicenza); L. Quattrini, (Ospedale Geriatrico, Ancona); G. Schillaci, (Policlinico Universitario, Corciano); F. Cecchi, (Presidio Ospedaliero Villa Basilewsky, Firenze); C. Pagnotta, (Presidio Ospedaliero, Foligno); G. Micoli, (Ospedale Civile S. Maria Goretti, Latina); L. Iacopetti, (Ospedale Val Di Nievole, Pescia); M. Uguccioni, (Ospedale Cto A. Alesini, Roma); G. Greco, (Ospedale S. Spirito, Roma); L. Robiglio, (Ospedale Tabarracci, Viareggio); G. Chiarandà, (Ospedale Muscatello, Augusta); A.R. Mascolo, (Ospedale Umberto I, Barletta); A. Storelli, (Ospedale A. Di Summa, Brindisi); P. Maxia, (Ospedale San Michele Brotzu, Cagliari); F. Vancheri, (Ospedale S. Elia, Caltanissetta); S. Iacopino (Policlinico, Catanzaro); L. Mantini, (Ospedale Civile Renzetti, Lanciano); G. Di Mauro, (Ospedale Curteri, Mercato S. Severino); M.A. Cauteruccio, Ospedale Civile Minervini, Mormanno); P. Morra, (Azienda Ospedaliera V. Monaldi, Napoli); F. Clemenza, (Ospedale G.F. Ingrassia, Palermo); A. Lopizzo, (Ospedale Regionale San Carlo, Potenza); P. Russo, (Ospedale Santa Maria Delle Grazie, Pozzuoli); G. Neri, (Ospedali Riuniti G. Melacrino E F. Bianchi, Reggio Calabria); C. De Matteis, (Ospedale Ave, Gratia Plena, San Felice A Cangello); S. Pede, (Ospedale N. Melli, S. Pietro Vernotico); P. Furgi, (Fondazione S. Maugeri, Telesse Terme); D. Staniscia, (Ospedale San Timoteo, Termoli).

Local coordinators of the OEC/HES 2008-2012 participating centers: Diego Vanuzzo (Centro di Prevenzione Cardiovascolare ASS 4 "Medio Friuli", Udine); Licia Iacoviello (Centro di ricerca e formazione ad alta tecnologia nelle scienze biomediche Giovanni Paolo II, Università Cattolica, Campobasso); Federico Vancheri (Ospedale S. Elia, Caltanissetta); Carlo Alberto Goldoni (Dipartimento di sanità pubblica, Azienda USL, Modena); Carmelo Antonio Caserta (Associazione calabrese di epatologia, Cittanova - Reggio Calabria); Antonio Lopizzo (Ospedale San Carlo, Potenza); Natalino Meloni (USL 4, Loceri - Nuoro); Marinella Gattone (Fondazione S. Maugeri, Veruno -

1  
2  
3 Novara); Giuseppe Salamina (SC Centro controllo malattia, ASL TO1, Torino); Alessandro Boccanelli  
4 (Ospedale San Giovanni Addolorata, Roma); Roberto Amici (Ospedale Santa Maria della Pietà,  
5 Camerino -Macerata); Gianfranco Alunni (Ospedale Santa Maria della Misericordia, Azienda  
6 Ospedaliera, Perugia); Giuseppe Favretto (Ospedale riabilitativo di alta specializzazione, Motta di  
7 Livenza - Treviso); Mariapiera Vettori (Azienda ULSS 13 del Veneto, Noale - Venezia); Marino  
8 Scherillo (Azienda Ospedaliera G. Rummo, Benevento); Pompilio Faggiano (Azienda Ospedaliera  
9 Spedali Civili, Brescia); Maria Teresa La Rovere (Fondazione Salvatore Maugeri, Istituto di  
10 riabilitazione, Montescano - Pavia); Maria Luisa Biorci (ASL 3 Genovese- PO "La Colletta", Arenzano  
11 - Genova); Pasquale Caldarola (Cardiologia, Ospedale di Terlizzi, Centro servizi territoriali della città,  
12 Bitonto - Bari); Giovanni Menegoni (Azienda provincial per i servizi sanitari di Trento, Presidio  
13 ospedaliero, Borgo Valsugana - Trento); Rosa Maria Teresa Cristaudo (Azienda USL della Valle  
14 d'Aosta, Aosta); Andrea Zipoli (Azienda USL 11, Ospedale San Giuseppe, Empoli - Firenze); Paolo  
15 Michele Accettura (Laboratorio analisi, Ospedale San Camillo, Atesa - Chieti).

16  
17  
18  
19 Local referents of HES 2018-2019 participating centers: Luigi Dell'Orso and Alessandro Grimaldi  
20 (Ospedale San Salvatore, L'Aquila); Nicola Giordano (ASL - Azienda Sanitaria Locale di Potenza,  
21 Potenza); Carmelo Caserta (Centro di Medicina Solidale – Associazione Calabrese di Epatologia,  
22 Reggio Calabria); Alessandra Fabbri (Casa della Salute AUSL RE, Montecchio Emilia); Fabrizio Ciaralli  
23 (Casa della Salute S. Caterina della Rosa, Rome); Fiorella Bagnasco (Municipality of Arenzano,  
24 Arenzano - Genova); Giuliana Rocca (ATS Bergamo); Giuseppe Salamina (ASL Città di Torino, Torino);  
25 Pietro Modesti (Università di Firenze, Florence); Federico Vancheri and Giulio Geraci (Ospedale S.  
26 Elia, Caltanissetta). Also we would to thank for HES 2018-2019: Anna Rita Ciccaglione, Cinzia  
27 Marcantonio, Roberto Bruni (ISS), Emanuele Bottosso and Anna Acampora (as trainee medical  
28 doctor at ISS), Giulia Cairella (ASL Roma 2, SINU) and Municipality of Potenza.

29  
30  
31 Administrative staff of the ANMCO/HCF: Giulia Salone, Angela Petrucci, Monica Nottoli; and to Laura  
32 Bellicini and to L Bellicini, consultant lawyer of the ANMCO-HCF. Fondazione IRCCS, Istituto  
33 nazionale dei tumori, Milano: Vittorio Krogh, Sara Grioni. Research Group MINISAL-GIRCSI and  
34 MENO SALE PIU' SALUTE: Pasquale Strazzullo, Ornella Russo, Lanfranco D'Elia, Roberto Iacone,  
35 Renato Ippolito, Enrico Agabiti-Rosei, Angelo Campanozzi, Marina Carcea, Ferruccio Galletti, Licia  
36 Iacoviello, Luca Scalfi, Alfonso Siani, Daniela Galeone, Chiara Donfrancesco, Simona Giampaoli.  
37 CARHES Research Group: Luca De Nicola, Chiara Donfrancesco, Roberto Minutolo, Cinzia Lo Noce,  
38 Luigi Palmieri, Amalia De Curtis, Licia Iacoviello, Carmine Zoccali, Loreto Gesualdo, Giuseppe Conte,  
39 Diego Vanuzzo, Simona Giampaoli. Italian Ministry of Health: Daniela Galeone, Paolo Bellisario,  
40 Giovanna Laurendi, Bianca Maria Polizzi. European Health Examination Survey, Reference Centre:  
41 Hanna Tolonen, Kari Kuulasmaa, Paivikki Koponen, Johan Helden, Susanna Conti, Georg Alfthan.  
42 Administrative staff of the ISS: Claudia Meduri, Tiziana Grisetti, Matilde Bocci, Gabriella Martelli,  
43 Valerio Occhiodoro, Maria Grazia Carella, Francesca Meduri.

44  
45  
46  
47 We acknowledge all persons who decided to participate to the 1998-2002, 2008-2012 and 2018-  
48 2019 surveys. A grateful thanks to Simona Giampaoli, research manager of the ISS, who founded  
49 the CUORE Project and coordinated with dedication the research activities until her retirement in  
50 2018.  
51  
52  
53  
54  
55  
56  
57  
58  
59  
60

## Funding

The Osservatorio Epidemiologico Cardiovascolare (OEC) 1998-2002 and the Osservatorio Epidemiologico Cardiovascolare/Health Examination Survey (OEC/HES) 2008-2012 within the CUORE Project were funded by the Italian Ministry of Health (MoH), by the Associazione Nazionale Medici Cardiologi Ospedalieri (ANMCO), by the Fondazione per il Tuo cuore onlus (Heart Care Foundation – HCF) and OEC/HES 2008-2012 also by the Joint Action of the European Health Examination Survey. The Health Examination Survey (HES) 2018-2019 within the CUORE Project was promoted and funded by the MoH -CCM for activities related to the CCM 2017 project - Central Actions Area - entitled "Monitoring of the average daily consumption of sodium in the Italian population". The OEC 1998-2002, OEC/HES 2008-2012 and HES 2018-2019 were also funded by the Italian National Institute of Health (Istituto Superiore di Sanità - ISS) through permanent staff salary and some travels refund.

**Competing Interests:** Italian Ministry of Health defined the needs and use of data for evidence based policy making and collaborate in the interpretation of results for health promotion and prevention activities and planning health services. Associazione Nazionale Medici Cardiologi Ospedalieri (ANMCO) and the Fondazione per il Tuo cuore onlus (Heart Care Foundation–HCF) had a role a role in the choice of collaborating centers, in the management of funding for the support of local centers and in the interpretation of results.

**Author Contributions:** Conceptualization, CD and LP; methodology, CD, CLN and LP; software, FV; formal analysis, CD; investigation, CD, CLN, ADL, EP and BB; resources, CD, DG, PB, LP and MMG ; data curation, CD, CLN and LP; writing—original draft preparation, CD; writing—review and editing, CD, ADL, CLN, EP, BB, FV, SV, FG, GO, MMG, DG, PB, and LP; visualization, CD; supervision, CD, LP and GO; project administration, CD; funding acquisition, CD, LP and MMG. All authors have read and agreed to the published version of the manuscript."

**Informed Consent Statement:** All invited persons received an informative note and signed an informed consent to participate.

**Data Sharing Statement:** The data are not publicly available due to ethical and legal restrictions on data sharing.

**Ethics Approval Statement:** The study was conducted in accordance with the Declaration of Helsinki, and approved by the Ethical Committee of the Italian National Institute of Health (Istituto Superiore di Sanità - ISS) by 11 March 2008 (Prot. PRE 150/08), 11 November 2009 (Prot. PRE/569/09) and 14 March 2018 (Prot. PRE 1176/18).



## REFERENCES

1. Olsen MH, Angell SY, Asma S, Boutouyrie P, Burger D, Chirinos JA, et al. A call to action and a lifecourse strategy to address the global burden of raised blood pressure on current and future generations: the Lancet Commission on hypertension. *Lancet*. 2016 Nov 26;388(10060):2665-2712.
2. Improving hypertension control in 3 million people: country experiences of programme development and implementation. World Health Organization 2020. Available online (accessed on 22/03/2022) <https://www.who.int/publications/i/item/improving-hypertension-control-in-3-million-people-country-experiences-of-programme-development-and-implementation>.
3. WHO CVD Risk Chart Working Group. World Health Organization cardiovascular disease risk charts: revised models to estimate risk in 21 global regions. *Lancet Glob Health*. 2019 Oct;7(10):e1332-e1345.
4. Visseren FLJ, Mach F, Smulders YM, Carballo D, Koskinas KC, Bäck M, et al. ESC National Cardiac Societies; ESC Scientific Document Group. 2021 ESC Guidelines on cardiovascular disease prevention in clinical practice. *Eur Heart J*. 2021 Sep 7;42(34):3227-3337.
5. Giampaoli S, Palmieri L, Donfrancesco C, Panico S, Vanuzzo D, Pilotto L, et al, on behalf of The CUORE Project Research Group. Cardiovascular risk assessment in Italy: the CUORE Project risk score and risk chart. *Italian Journal of Public Health*, 2007; Year 5, Vol. 4, N. 2: 102-109.
6. WHO. Global Action Plan for the prevention and control of Noncommunicable Diseases 2013-2020. World Health Organization 2013.
7. WHO Discussion Paper For The Regional Expert Consultations - Development Of An Implementation Roadmap 2023–2030 For The Global Action Plan For The Prevention And Control Of Ncds 2013–2030. (Version Dated 20 August 2021) Available online (accessed on 22/03/2022) <https://www.who.int/publications/m/item/implementation-roadmap-2023-2030-for-the-who-global-action-plan-for-the-prevention-and-control-of-ncds-2023-2030>.
8. Menotti A, Seccareccia F, Lanti M, Farchi G, Conti S, Scanga M, et al; RIFLE Project Research Group. Mean levels and distributions of some cardiovascular risk factors in Italy in the 1970's and the 1980's. The Italian RIFLE Pooling Project. Risk factors and life expectancy. *G Ital Cardiol*. 1995;25:1539-72.
9. Salvetti M, Muiesan ML, Rizzoni D, Bettoni G, Monteduro C, Corbellin C, et al. Night time blood pressure and cardiovascular structure in a middle –aged general population in northern Italy: the Vobarno study. *J Hum Hypertens*. 2001;15(12):879-85.
10. Bombelli M, Toso E, Peronio M, Fodri D, Volpe M, Brambilla G, et al. The Pamela study: main findings and perspectives *Curr Hypertens Rep*. 2013;15(3):238-43.
11. Mancia G, Bombelli M, Lanzarotti A, Grassi G, Cesana G, Zanchetti A, et al. Systolic vs diastolic blood pressure control in the hypertensive patients of the PAMELA population. *Pressioni Arteriose Monitorate E Loro Associazioni*. *Arch Intern Med*. 2002;162(5):582-6.
12. Cirillo M, Terradura-Vagnarelli O, Mancini M, Menotti A, Zanchetti A, Laurenzi M. Cohort profile: the Gubbio Population Study. *Int J Epidemiol*. 2014;43(3):713-20.
13. Noncommunicable Diseases Country Profiles 2018. World Health Organization 2018. Available online (accessed on 22/03/2022): <https://apps.who.int/iris/handle/10665/274512>.
14. A Comprehensive Global Monitoring Framework, Including Indicators, And A Set Of Voluntary Global Targets For The Prevention And Control Of Noncommunicable Diseases WHO 2012. Available online (accessed on 22/03/2022) [https://www.who.int/nmh/events/2012/discussion\\_paper2\\_20120322.pdf](https://www.who.int/nmh/events/2012/discussion_paper2_20120322.pdf)



15. Noncommunicable Diseases Global Monitoring Framework: Indicator Definitions and Specifications (WHO 2014). Available online (accessed on 22/03/2022) <https://www.who.int/publications/i/item/ncd-gmf-indicator-definitions-and-specifications>.
16. Donfrancesco C, Profumo E, Lo Noce C, Minutoli D, Di Lonardo A, Buttari B, et al. Trends of overweight, obesity and anthropometric measurements among the adult population in Italy: The CUORE Project health examination surveys 1998, 2008, and 2018. *PLoS One*. 2022 Mar 1;17(3):e0264778.
17. Donfrancesco C, Lo Noce C, Russo O, Minutoli D, Di Lonardo A, Profumo E, et al. Trend of salt intake measured by 24-h urine collection in the Italian adult population between the 2008 and 2018 CUORE project surveys. *Nutr Metab Cardiovasc Dis*. 2021 Mar 10;31(3):802-813.
18. Donfrancesco C, Lo Noce C, Russo O, Buttari B, Profumo E, Minutoli D, et al. Trend in potassium intake and Na/K ratio in the Italian adult population between the 2008 and 2018 CUORE project surveys. *Nutr Metab Cardiovasc Dis*. 2021 Mar 10;31(3):814-826.
19. Giampaoli S, Palmieri L, Donfrancesco C, Lo Noce C, Pilotto L, Vanuzzo D; Osservatorio Epidemiologico Cardiovascolare/Health Examination Survey Research Group. Cardiovascular health in Italy. Ten-year surveillance of cardiovascular diseases and risk factors: Osservatorio Epidemiologico Cardiovascolare/Health Examination Survey 1998-2012. *Eur J Prev Cardiol*. 2015 Sep;22(2 Suppl):9-37.
20. European Health Examination Survey (EHES) – Measuring the Health of Europeans. Available online (accessed on 22/03/2022): [http://www.ehes.info/national/national\\_hes\\_status.htm](http://www.ehes.info/national/national_hes_status.htm)
21. Tolonen H, Koponen P, Naska A, Männistö S, Broda G, et al; EHES Pilot Project. Challenges in standardization of blood pressure measurement at the population level. *BMC Med Res Methodol*. 2015 Apr 10;15:33.
22. Williams B, Mancia G, Spiering W, Agabiti Rosei E, Azizi M, Burnier M, et al; ESC Scientific Document Group. 2018 ESC/ESH Guidelines for the management of arterial hypertension. *Eur Heart J*. 2018 Sep 1;39(33):3021-3104.
23. National Institute of Statistics. Resident population 1991-2019. Available online (accessed on 22/03/2022) [http://dati.istat.it/Index.aspx?DataSetCode=DCIS\\_RICPOPRES2011](http://dati.istat.it/Index.aspx?DataSetCode=DCIS_RICPOPRES2011)
24. Revision of the European Standard Population - Report of Eurostat's task force - 2013 edition Available online (accessed on 22/03/2022) <https://ec.europa.eu/eurostat/documents/3859598/5926869/KS-RA-13-028-EN.PDF/e713fa79-1add-44e8-b23d-5e8fa09b3f8f>
25. NCD Risk Factor Collaboration (NCD-RisC). Worldwide trends in hypertension prevalence and progress in treatment and control from 1990 to 2019: a pooled analysis of 1201 population-representative studies with 104 million participants. *Lancet* 2021; 398: 957–80.
26. NCD Risk Factor Collaboration (NCD-RisC) <https://ncdrisc.org/obesity-prevalence-ranking.html>
27. WHO. High blood pressure - country experiences and effective interventions utilized across the European Region. World Health Organization 2013. Available online (accessed on 22/03/2022) [https://www.euro.who.int/\\_\\_data/assets/pdf\\_file/0008/185903/e96816.pdf](https://www.euro.who.int/__data/assets/pdf_file/0008/185903/e96816.pdf)
28. Strazzullo P, Cairella G, Campanozzi A, Carcea M, Galeone D, Galletti F, et al. Population based strategy for dietary salt intake reduction: Italian initiatives in the European framework. for the GIRCSI Working Group *Nutr Metabol Cardiovasc Dis* 2012 Mar; 22(3):161e6.
29. Bann, D., Fluharty, M., Hardy, R., Scholes S. Socioeconomic inequalities in blood pressure: coordinated analysis of 147,775 participants from repeated birth cohort and cross-sectional datasets, 1989 to 2016. *BMC Med* 18, 338 (2020).
30. CUOREDATA platform - The CUORE Project <http://www.cuore.iss.it/eng/survey/cuoredata>.

- 1
- 2
- 3 31. Venezia A, Barba G, Russo O, Capasso C, De Luca V, Farinaro E, et al. Dietary sodium intake in a
- 4 sample of adult male population in southern Italy: results of the Olivetti Heart Study. *Eur J Clin*
- 5 *Nutr.* 2010 May;64(5):518-24.
- 6
- 7 32. European Society of Hypertension-European Society of Cardiology Guidelines Committee. 2003
- 8 European Society of Hypertension-European Society of Cardiology guidelines for the
- 9 management of arterial hypertension. *J Hypertens.* 2003 Jun;21(6):1011-53.
- 10
- 11 33. Mancia G, De Backer G, Dominiczak A, Cifkova R, Fagard R, Germano G, et al; European Society
- 12 of Hypertension; European Society of Cardiology. 2007 ESH-ESC Guidelines for the management
- 13 of arterial hypertension: the task force for the management of arterial hypertension of the
- 14 European Society of Hypertension (ESH) and of the European Society of Cardiology (ESC). *Blood*
- 15 *Press.* 2007;16(3):135-232.
- 16
- 17 34. Mancia G, Fagard R, Narkiewicz K, Redón J, Zanchetti A, Böhm M, et; Task Force Members. 2013
- 18 ESH/ESC Guidelines for the management of arterial hypertension: the Task Force for the
- 19 management of arterial hypertension of the European Society of Hypertension (ESH) and of the
- 20 European Society of Cardiology (ESC). *J Hypertens.* 2013 Jul;31(7):1281-357.
- 21
- 22 35. Wing LM, Reid CM, Ryan P, Beilin LJ, Brown MA, Jennings GL, et al; Second Australian National
- 23 Blood Pressure Study Group. A comparison of outcomes with angiotensin-converting--enzyme
- 24 inhibitors and diuretics for hypertension in the elderly. *N Engl J Med.* 2003 Feb 13;348(7):583-
- 25 92.
- 26
- 27 36. Palmieri L, Bennett K, Giampaoli S, Capewell S. Explaining the Decrease in Coronary Heart
- 28 Disease Mortality in Italy between 1980 and 2000. *Am J Public Health.* 2010 Apr;100(4):684-92.
- 29
- 30 37. Ogata S, Nishimura K, Guzman-Castillo M, Sumita Y, Nakai M, et al. Explaining the decline in
- 31 coronary heart disease mortality rates in Japan: Contributions of changes in risk factors and
- 32 evidence-based treatments between 1980 and 2012. *Int J Cardiol.* 2019 Sep 15;291:183-188.
- 33
- 34 38. Mindell JS, Giampaoli S, Goesswald A, Kamtsiuris P, Mann C, Männistö S, et al. Sample selection,
- 35 recruitment and participation rates in health examination surveys in Europe experience from
- 36 seven national surveys. *BMC Med Res Methodol.* 2015;15:78.
- 37
- 38 39. Italian National Institute of Statistics. Population education levels and occupational returns: the
- 39 main indicators. ISTAT 2017. Available online (accessed on 22/03/2022):
- 40 <https://www.istat.it/it/files/2018/07/Indicatori-dellistruzione.pdf>
- 41
- 42 40. European Commission. Commission Regulation (EU) No 847/2012 on 19 September 2012
- 43 amending Annex XVII to Regulation (EC) No 1907/2006 of the European Parliament and of the
- 44 council on the registration, evaluation, authorisation and restriction of chemicals (REACH) as
- 45 regards mercury. In 847/2012. Edited by European Commission. *Off J Eur Union*, L253,
- 46 20.9.2012.
- 47
- 48 41. Ostchega Y, Zhang G, Sorlie P, Hughes JP, Reed-Gillette DS, Nwankwo T, et al. Blood pressure
- 49 randomized methodology study comparing automatic oscillometric and mercury
- 50 sphygmomanometer devices: national health and nutrition examination survey, 2009–2010.
- 51 *Natl Health Stat Report.* 2012: (59):1–15
- 52
- 53 42. Chen Z, Wang X, Wang Z, Zhang L, Hao G, Dong Y, et al; China Hypertension Survey Group.
- 54 Assessing the validity of oscillometric device for blood pressure measurement in a large
- 55 population-based epidemiologic study. *J Am Soc Hypertens.* 2017 Nov;11(11):730-736.e4.
- 56
- 57 43. El Assaad, Mohamed A.; Topouchian, Jirar A.; Darné, Bernadette M.; Asmar, Roland
- 58 G. Validation of the Omron HEM-907 device for blood pressure measurement, *Blood Pressure*
- 59 *Monitoring: August 2002 - Volume 7 - Issue 4 - p 237-241.*
- 60

- 1  
2  
3 44. de Greeff A, Lorde I, Wilton A, Seed P, Coleman AJ, Shennan AH. Calibration accuracy of  
4 hospital-based non-invasive blood pressure measuring devices. *J Hum Hypertens.*  
5 2010;24(1):58–63.  
6  
7 45. HK Wolf, J Tuomilehto, K Kuulasmaa, S Domarkiene, Z Cepaitis, A Molarius, et al. Blood pressure  
8 levels in the 41 populations of the WHO MONICA Project. *Journal of Human Hypertension*  
9 (1997) 11, 733–742.  
10  
11  
12  
13  
14  
15  
16  
17  
18  
19  
20  
21  
22  
23  
24  
25  
26  
27  
28  
29  
30  
31  
32  
33  
34  
35  
36  
37  
38  
39  
40  
41  
42  
43  
44  
45  
46  
47  
48  
49  
50  
51  
52  
53  
54  
55  
56  
57  
58  
59  
60

For peer review only

## FIGURES

**Figure 1. Mean of blood pressure and prevalence of raised blood pressure, hypertension and controlled hypertension based on measurements, by age class, educational level, and period. Italian resident men aged 35-74 years, the CUORE Project Surveys 1998–2002, 2008–2012, and 2018–2019.**

Bars refer to 95% confidence intervals. Statistics by educational level were age-standardized by Italian National Institute of Statistics-ISTAT Italian population 2000, 2010, and 2019, respectively. Higher education—high school or college; lower education—primary or middle school. Raised blood pressure: systolic blood pressure  $\geq 140$  mmHg and/or diastolic blood pressure  $\geq 90$  mmHg. Hypertension: systolic blood pressure  $\geq 140$  mmHg and/or diastolic blood pressure  $\geq 90$  mmHg and/or under specific pharmacological treatment. Controlled hypertension: under drug treatment for hypertension with systolic blood pressure  $< 140$  mmHg and diastolic blood pressure  $< 90$  mmHg. Pool of the following Italian Regions: Piedmont, Lombardy, Liguria, Emilia Romagna, Tuscany, Lazio, Abruzzo, Basilicata, Calabria, and Sicily.

**Figure 2. Mean of blood pressure and prevalence of raised blood pressure, hypertension and controlled hypertension based on measurements, by age class, educational level, and period. Italian resident women aged 35-74 years, the CUORE Project Surveys 1998–2002, 2008–2012, and 2018–2019.**

Bars refer to 95% confidence intervals. Statistics by educational level were age-standardized by Italian National Institute of Statistics-ISTAT Italian population 2000, 2010, and 2019, respectively. Higher education—high school or college; lower education—primary or middle school. Raised blood pressure: systolic blood pressure  $\geq 140$  mmHg and/or diastolic blood pressure  $\geq 90$  mmHg. Hypertension: systolic blood pressure  $\geq 140$  mmHg and/or diastolic blood pressure  $\geq 90$  mmHg and/or under specific pharmacological treatment. Controlled hypertension: under drug treatment for hypertension with systolic blood pressure  $< 140$  mmHg and diastolic blood pressure  $< 90$  mmHg. Pool of the following Italian Regions: Piedmont, Lombardy, Liguria, Emilia Romagna, Tuscany, Lazio, Abruzzo, Basilicata, Calabria, and Sicily.

**Figure 3. Prevalence of raised blood pressure based on measurements, by sex, Regions, and period. Italian resident men and women aged 35-74 years, the CUORE Project Surveys 1998–2002, 2008–2012, and 2018–2019.**

Italian Regions: Piedmont, Lombardy, Liguria, Emilia Romagna, Tuscany, Lazio, Abruzzo, Basilicata, Calabria, and Sicily. Prevalences were age-standardized by Italian National Institute of Statistics-ISTAT Italian population 2000, 2010, and 2019, respectively. Raised blood pressure: systolic blood pressure  $\geq 140$  mmHg and/or diastolic blood pressure  $\geq 90$  mmHg.

**Figure 4. Prevalence of hypertension based on measurements, by sex, Regions, and period. Italian resident men and women aged 35-74 years, the CUORE Project Surveys 1998–2002, 2008–2012, and 2018–2019.**

Italian Regions: Piedmont, Lombardy, Liguria, Emilia Romagna, Tuscany, Lazio, Abruzzo, Basilicata, Calabria, and Sicily. Prevalences were age-standardized by Italian National Institute of Statistics-ISTAT Italian population 2000, 2010, and 2019, respectively. Hypertension: systolic blood pressure  $\geq 140$  mmHg and/or diastolic blood pressure  $\geq 90$  mmHg and/or under specific pharmacological treatment.

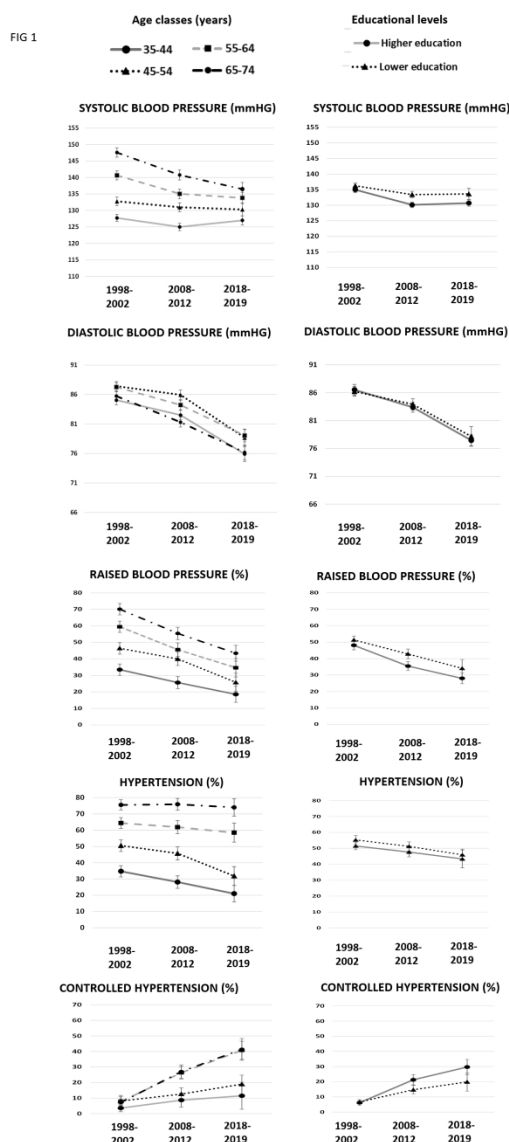

Figure 1. Mean of blood pressure and prevalence of raised blood pressure, hypertension and controlled hypertension based on measurements, by age class, educational level, and period. Italian resident men aged 35-74 years, the CUORE Project Surveys 1998-2002, 2008-2012, and 2018-2019.

Bars refer to 95% confidence intervals. Statistics by educational level were age-standardized by Italian National Institute of Statistics-ISTAT Italian population 2000, 2010, and 2019, respectively. Higher education—high school or college; lower education—primary or middle school. Raised blood pressure: systolic blood pressure  $\geq 140$  mmHg and/or diastolic blood pressure  $\geq 90$  mmHg. Hypertension: systolic blood pressure  $\geq 140$  mmHg and/or diastolic blood pressure  $\geq 90$  mmHg and/or under specific pharmacological treatment. Controlled hypertension: under drug treatment for hypertension with systolic blood pressure  $< 140$  mmHg and diastolic blood pressure  $< 90$  mmHg. Pool of the following Italian Regions: Piedmont, Lombardy, Liguria, Emilia Romagna, Tuscany, Lazio, Abruzzo, Basilicata, Calabria, and Sicily.

322x586mm (150 x 150 DPI)

1  
2  
3  
4  
5  
6  
7  
8  
9  
10  
11  
12  
13  
14  
15  
16  
17  
18  
19  
20  
21  
22  
23  
24  
25  
26  
27  
28  
29  
30  
31  
32  
33  
34  
35  
36  
37  
38  
39  
40  
41  
42  
43  
44  
45  
46  
47  
48  
49  
50  
51  
52  
53  
54  
55  
56  
57  
58  
59  
60





Figure 2. Mean of blood pressure and prevalence of raised blood pressure, hypertension and controlled hypertension based on measurements, by age class, educational level, and period. Italian resident women aged 35-74 years, the CUORE Project Surveys 1998-2002, 2008-2012, and 2018-2019.

Bars refer to 95% confidence intervals. Statistics by educational level were age-standardized by Italian National Institute of Statistics-ISTAT Italian population 2000, 2010, and 2019, respectively. Higher education—high school or college; lower education—primary or middle school. Raised blood pressure: systolic blood pressure  $\geq 140$  mmHg and/or diastolic blood pressure  $\geq 90$  mmHg. Hypertension: systolic blood pressure  $\geq 140$  mmHg and/or diastolic blood pressure  $\geq 90$  mmHg and/or under specific pharmacological treatment. Controlled hypertension: under drug treatment for hypertension with systolic blood pressure  $< 140$  mmHg and diastolic blood pressure  $< 90$  mmHg. Pool of the following Italian Regions: Piedmont, Lombardy, Liguria, Emilia Romagna, Tuscany, Lazio, Abruzzo, Basilicata, Calabria, and Sicily.

366x594mm (150 x 150 DPI)

1  
2  
3  
4  
5  
6  
7  
8  
9  
10  
11  
12  
13  
14  
15  
16  
17  
18  
19  
20  
21  
22  
23  
24  
25  
26  
27  
28  
29  
30  
31  
32  
33  
34  
35  
36  
37  
38  
39  
40  
41  
42  
43  
44  
45  
46  
47  
48  
49  
50  
51  
52  
53  
54  
55  
56  
57  
58  
59  
60

Fig 3

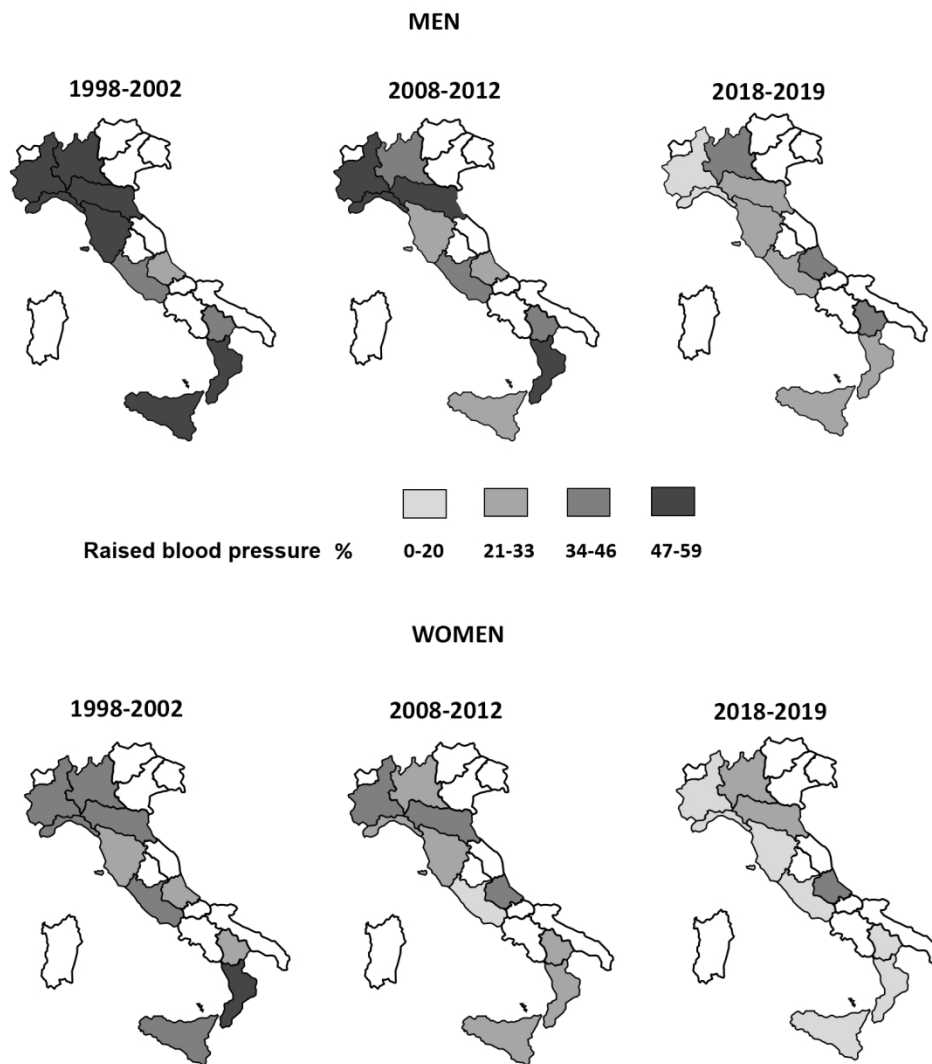

Figure 3. Prevalence of raised blood pressure based on measurements, by sex, Regions, and period. Italian resident men and women aged 35-74 years, the CUORE Project Surveys 1998-2002, 2008-2012, and 2018-2019. Italian Regions: Piedmont, Lombardy, Liguria, Emilia Romagna, Tuscany, Lazio, Abruzzo, Basilicata, Calabria, and Sicily. Prevalences were age-standardized by Italian National Institute of Statistics-ISTAT Italian population 2000, 2010, and 2019, respectively. Raised blood pressure: systolic blood pressure  $\geq 140$  mmHg and/or diastolic blood pressure  $\geq 90$  mmHg.

287x345mm (150 x 150 DPI)

Fig 4

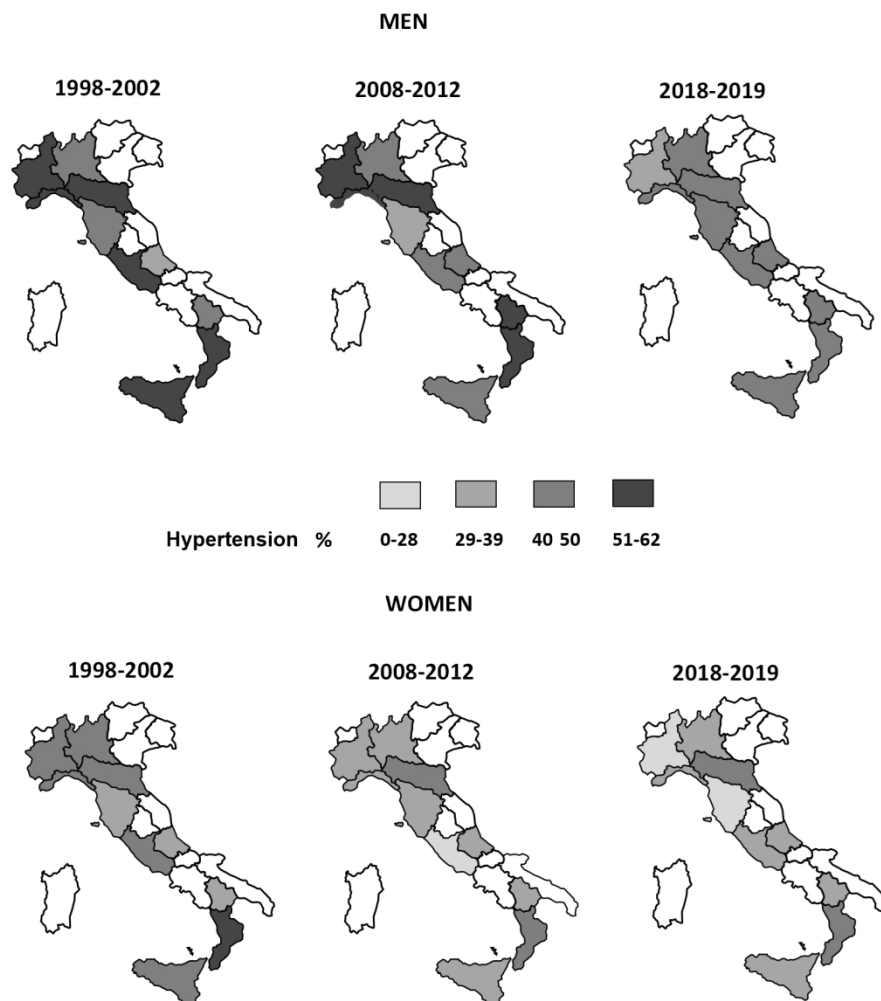

Figure 4. Prevalence of hypertension based on measurements, by sex, Regions, and period. Italian resident men and women aged 35-74 years, the CUORE Project Surveys 1998-2002, 2008-2012, and 2018-2019. Italian Regions: Piedmont, Lombardy, Liguria, Emilia Romagna, Tuscany, Lazio, Abruzzo, Basilicata, Calabria, and Sicily. Prevalences were age-standardized by Italian National Institute of Statistics-ISTAT Italian population 2000, 2010, and 2019, respectively. Hypertension: systolic blood pressure  $\geq 140$  mmHg and/or diastolic blood pressure  $\geq 90$  mmHg and/or under specific pharmacological treatment.

287x367mm (150 x 150 DPI)

**Table S1. Demographic characteristics of men and women with available blood pressure measurements and information on the use of specific drug treatment within the CUORE Project Surveys 1998-2002, 2008-2012 and 2018-2019.**

|                          |                  | <b>MEN</b>       |          |                  |          |                  |          |
|--------------------------|------------------|------------------|----------|------------------|----------|------------------|----------|
|                          |                  | <b>1998-2002</b> |          | <b>2008-2012</b> |          | <b>2018-2019</b> |          |
|                          |                  | <b>n</b>         | <b>%</b> | <b>n</b>         | <b>%</b> | <b>n</b>         | <b>%</b> |
| <b>Age class (years)</b> |                  |                  |          |                  |          |                  |          |
|                          | 35-44            | 717              | 24       | 530              | 24       | 248              | 24       |
|                          | 45-54            | 752              | 25       | 588              | 27       | 248              | 24       |
|                          | 55-64            | 784              | 26       | 564              | 25       | 277              | 27       |
|                          | 65-74            | 732              | 25       | 536              | 24       | 258              | 25       |
| <b>Educational level</b> |                  |                  |          |                  |          |                  |          |
|                          |                  | <b>n</b>         | <b>%</b> | <b>n</b>         | <b>%</b> | <b>n</b>         | <b>%</b> |
|                          | Higher education | 1249             | 42       | 1183             | 54       | 725              | 71       |
|                          | Lower education  | 1730             | 58       | 1018             | 46       | 303              | 29       |
|                          |                  | <b>WOMEN</b>     |          |                  |          |                  |          |
|                          |                  | <b>1998-2002</b> |          | <b>2008-2012</b> |          | <b>2018-2019</b> |          |
|                          |                  | <b>n</b>         | <b>%</b> | <b>n</b>         | <b>%</b> | <b>n</b>         | <b>%</b> |
| <b>Age class (years)</b> |                  |                  |          |                  |          |                  |          |
|                          | 35-44            | 715              | 24       | 514              | 23       | 237              | 22       |
|                          | 45-54            | 769              | 26       | 577              | 26       | 271              | 25       |
|                          | 55-64            | 778              | 26       | 584              | 27       | 280              | 26       |
|                          | 65-74            | 693              | 23       | 529              | 24       | 278              | 26       |
| <b>Educational level</b> |                  |                  |          |                  |          |                  |          |
|                          |                  | <b>n</b>         | <b>%</b> | <b>n</b>         | <b>%</b> | <b>n</b>         | <b>%</b> |
|                          | Higher education | 1052             | 36       | 1167             | 53       | 725              | 68       |
|                          | Lower education  | 1887             | 64       | 1017             | 47       | 339              | 32       |

Pool of the following Italian Regions: Piedmont, Lombardy, Liguria, Emilia Romagna, Tuscany, Lazio, Abruzzo, Basilicata, Calabria, and Sicily. Higher education - high school or college; lower education - primary or middle school.

Table S2. Blood pressure and heart rate measurements mean levels by age class and period. Italian resident men aged 35–74 years, the CUORE Project Surveys 1998–2002, 2008–2012 and 2018–2019.

| MEN                                                      |           |      |    |        |                              |           |      |    |        |                              |           |      |    |        |                              |                        |      |                        |        |
|----------------------------------------------------------|-----------|------|----|--------|------------------------------|-----------|------|----|--------|------------------------------|-----------|------|----|--------|------------------------------|------------------------|------|------------------------|--------|
| Systolic blood pressure (mmHg)                           |           |      |    |        |                              |           |      |    |        |                              |           |      |    |        |                              |                        |      |                        |        |
| Age class (years)                                        | 1998–2002 |      |    |        | ANOVA within period sign *** | 2008–2012 |      |    |        | ANOVA within period sign *** | 2018–2019 |      |    |        | ANOVA within period sign *** | 2018–2019 vs 1998–2002 |      | 2018–2019 vs 2008–2012 |        |
|                                                          | n         | mean | DS | 95% CI |                              | n         | mean | DS | 95% CI |                              | n         | mean | DS | 95% CI |                              | n                      | mean | DS                     | 95% CI |
| 35–44                                                    | 717       | 128  | 15 | 127    | 129                          | 530       | 125  | 13 | 124    | 126                          | 248       | 127  | 11 | 126    | 128                          | -1                     | ns   | 2                      | *      |
| 45–54                                                    | 752       | 133  | 18 | 131    | 134                          | 588       | 131  | 16 | 130    | 132                          | 248       | 130  | 16 | 128    | 132                          | -2                     | *    | -1                     | ns     |
| 55–64                                                    | 784       | 141  | 20 | 139    | 142                          | 564       | 135  | 17 | 134    | 136                          | 277       | 134  | 14 | 132    | 135                          | -7                     | ***  | -1                     | ns     |
| 65–74                                                    | 732       | 148  | 20 | 146    | 149                          | 536       | 141  | 18 | 139    | 142                          | 258       | 136  | 17 | 134    | 138                          | -11                    | ***  | -4                     | **     |
| Diastolic blood pressure (mmHg)                          |           |      |    |        |                              |           |      |    |        |                              |           |      |    |        |                              |                        |      |                        |        |
| Age class (years)                                        | 1998–2002 |      |    |        | ANOVA within period sign *** | 2008–2012 |      |    |        | ANOVA within period sign *** | 2018–2019 |      |    |        | ANOVA within period sign **  | 2018–2019 vs 1998–2002 |      | 2018–2019 vs 2008–2012 |        |
|                                                          | n         | mean | DS | 95% CI |                              | n         | mean | DS | 95% CI |                              | n         | mean | DS | 95% CI |                              | n                      | mean | DS                     | 95% CI |
| 35–44                                                    | 717       | 85   | 11 | 84     | 86                           | 530       | 83   | 10 | 82     | 83                           | 248       | 76   | 10 | 75     | 77                           | -9                     | ***  | -7                     | ***    |
| 45–54                                                    | 752       | 87   | 11 | 87     | 88                           | 588       | 86   | 10 | 85     | 87                           | 248       | 79   | 11 | 77     | 80                           | -9                     | ***  | -7                     | ***    |
| 55–64                                                    | 784       | 87   | 11 | 87     | 88                           | 564       | 84   | 10 | 83     | 85                           | 277       | 79   | 9  | 78     | 80                           | -8                     | ***  | -5                     | ***    |
| 65–74                                                    | 732       | 86   | 10 | 85     | 86                           | 536       | 81   | 10 | 80     | 82                           | 258       | 76   | 10 | 75     | 77                           | -10                    | ***  | -5                     | ***    |
| Systolic blood pressure not under drug treatment (mmHg)  |           |      |    |        |                              |           |      |    |        |                              |           |      |    |        |                              |                        |      |                        |        |
| Age class (years)                                        | 1998–2002 |      |    |        | ANOVA within period sign *** | 2008–2012 |      |    |        | ANOVA within period sign *** | 2018–2019 |      |    |        | ANOVA within period sign *** | 2018–2019 vs 1998–2002 |      | 2018–2019 vs 2008–2012 |        |
|                                                          | n         | mean | DS | 95% CI |                              | n         | mean | DS | 95% CI |                              | n         | mean | DS | 95% CI |                              | n                      | mean | DS                     | 95% CI |
| 35–44                                                    | 682       | 127  | 14 | 126    | 128                          | 504       | 125  | 13 | 123    | 126                          | 237       | 127  | 11 | 125    | 128                          | -0.2                   | ns   | 2                      | *      |
| 45–54                                                    | 640       | 131  | 17 | 130    | 132                          | 481       | 129  | 16 | 127    | 130                          | 212       | 128  | 14 | 126    | 130                          | -3                     | *    | -1                     | ns     |
| 55–64                                                    | 581       | 137  | 19 | 136    | 139                          | 370       | 133  | 17 | 131    | 135                          | 170       | 133  | 14 | 131    | 135                          | -4                     | **   | -0.2                   | ns     |
| 65–74                                                    | 454       | 143  | 20 | 142    | 145                          | 252       | 138  | 18 | 136    | 140                          | 125       | 138  | 18 | 134    | 141                          | -6                     | **   | -1                     | ns     |
| Diastolic blood pressure not under drug treatment (mmHg) |           |      |    |        |                              |           |      |    |        |                              |           |      |    |        |                              |                        |      |                        |        |
| Age class (years)                                        | 1998–2002 |      |    |        | ANOVA within period sign **  | 2008–2012 |      |    |        | ANOVA within period sign *** | 2018–2019 |      |    |        | ANOVA within period sign ns  | 2018–2019 vs 1998–2002 |      | 2018–2019 vs 2008–2012 |        |
|                                                          | n         | mean | DS | 95% CI |                              | n         | mean | DS | 95% CI |                              | n         | mean | DS | 95% CI |                              | n                      | mean | DS                     | 95% CI |
| 35–44                                                    | 682       | 85   | 10 | 84     | 85                           | 504       | 82   | 10 | 81     | 83                           | 237       | 75   | 10 | 74     | 77                           | -9                     | ***  | -7                     | ***    |
| 45–54                                                    | 640       | 86   | 11 | 86     | 87                           | 481       | 85   | 10 | 84     | 86                           | 212       | 77   | 10 | 76     | 78                           | -9                     | ***  | -8                     | ***    |
| 55–64                                                    | 581       | 86   | 10 | 85     | 87                           | 370       | 84   | 10 | 83     | 85                           | 170       | 78   | 9  | 77     | 79                           | -8                     | ***  | -6                     | ***    |
| 65–74                                                    | 454       | 84   | 10 | 83     | 85                           | 252       | 81   | 10 | 80     | 82                           | 125       | 77   | 11 | 75     | 79                           | -8                     | ***  | -4                     | **     |
| Heart rate (beats per minute)                            |           |      |    |        |                              |           |      |    |        |                              |           |      |    |        |                              |                        |      |                        |        |
| Age class (years)                                        | 1998–2002 |      |    |        | ANOVA within period sign ns  | 2008–2012 |      |    |        | ANOVA within period sign ns  | 2018–2019 |      |    |        | ANOVA within period sign ns  | 2018–2019 vs 1998–2002 |      | 2018–2019 vs 2008–2012 |        |
|                                                          | n         | mean | DS | 95% CI |                              | n         | mean | DS | 95% CI |                              | n         | mean | DS | 95% CI |                              | n                      | mean | DS                     | 95% CI |
| 35–44                                                    | 715       | 66   | 10 | 65     | 67                           | 530       | 68   | 9  | 67     | 69                           | 248       | 72   | 12 | 70     | 73                           | 6                      | ***  | 4                      | ***    |
| 45–54                                                    | 750       | 66   | 11 | 65     | 67                           | 588       | 69   | 10 | 68     | 70                           | 248       | 72   | 11 | 71     | 74                           | 6                      | ***  | 3                      | ***    |
| 55–64                                                    | 783       | 66   | 11 | 65     | 67                           | 564       | 68   | 10 | 68     | 69                           | 277       | 72   | 12 | 70     | 73                           | 6                      | ***  | 3                      | ***    |
| 65–74                                                    | 732       | 66   | 11 | 65     | 67                           | 536       | 69   | 10 | 68     | 69                           | 258       | 70   | 12 | 69     | 72                           | 4                      | ***  | 2                      | ns     |

SD: standard deviation; CI: confidence interval. Diff: mean difference between 2018–2019 and 1998–2002 or 2018–2019 and 2008–2012; the values are approximated taking into account the first decimal of means. ANOVA: Analysis of Variance to compare variables among age classes within periods. t-test to compare variables between periods. \*\*\* p-value<0.0001; \*\* p-value<0.01; \*p-value<0.05; ns not significant p-value. Pool of the following Italian Regions: Piedmont, Lombardy, Liguria, Emilia Romagna, Tuscany, Lazio, Abruzzo, Basilicata, Calabria, and Sicily.



**Table S3. Blood pressure and heart rate measurements mean levels by age class and period. Italian resident women aged 35–74 years, the CUORE Project Surveys 1998-2002, 2008-2012 and 2018-2019.**

| WOMEN                                                    |           |      |    |         |                          |           |      |    |         |                          |           |      |    |         |                          |                        |             |                        |             |
|----------------------------------------------------------|-----------|------|----|---------|--------------------------|-----------|------|----|---------|--------------------------|-----------|------|----|---------|--------------------------|------------------------|-------------|------------------------|-------------|
| Systolic blood pressure (mmHg)                           |           |      |    |         |                          |           |      |    |         |                          |           |      |    |         |                          |                        |             |                        |             |
| Age class (years)                                        | 1998-2002 |      |    |         | ANOVA within period sign | 2008-2012 |      |    |         | ANOVA within period sign | 2018-2019 |      |    |         | ANOVA within period sign | 2018-2019 vs 1998-2002 |             | 2018-2019 vs 2008-2012 |             |
|                                                          | n         | mean | DS | 95% CI  |                          | n         | mean | DS | 95% CI  |                          | n         | mean | DS | 95% CI  |                          | Diff                   | t-test sign | Diff                   | t-test sign |
| 35-44                                                    | 715       | 118  | 14 | 117 119 | ***                      | 514       | 114  | 13 | 113 116 | ***                      | 237       | 113  | 13 | 111 114 | ***                      | -6                     | ***         | -2                     | ns          |
| 45-54                                                    | 769       | 128  | 18 | 126 129 |                          | 577       | 122  | 15 | 121 123 |                          | 271       | 120  | 16 | 118 121 |                          | -8                     | ***         | -2                     | *           |
| 55-64                                                    | 778       | 139  | 20 | 137 140 |                          | 584       | 132  | 18 | 131 134 |                          | 280       | 125  | 16 | 123 127 |                          | -14                    | ***         | -7                     | ***         |
| 65-74                                                    | 693       | 147  | 20 | 146 149 |                          | 529       | 143  | 20 | 141 144 |                          | 278       | 133  | 19 | 130 135 |                          | -15                    | ***         | -10                    | ***         |
| Diastolic blood pressure (mmHg)                          |           |      |    |         |                          |           |      |    |         |                          |           |      |    |         |                          |                        |             |                        |             |
| Age class (years)                                        | 1998-2002 |      |    |         | ANOVA within period sign | 2008-2012 |      |    |         | ANOVA within period sign | 2018-2019 |      |    |         | ANOVA within period sign | 2018-2019 vs 1998-2002 |             | 2018-2019 vs 2008-2012 |             |
|                                                          | n         | mean | DS | 95% CI  |                          | n         | mean | DS | 95% CI  |                          | n         | mean | DS | 95% CI  |                          | Diff                   | t-test sign | Diff                   | t-test sign |
| 35-44                                                    | 715       | 78   | 10 | 77 78   | ***                      | 514       | 75   | 9  | 74 75   | ***                      | 237       | 70   | 10 | 68 71   | ***                      | -8                     | ***         | -5                     | ***         |
| 45-54                                                    | 769       | 83   | 11 | 82 83   |                          | 577       | 79   | 9  | 78 79   |                          | 271       | 74   | 11 | 72 75   |                          | -9                     | ***         | -5                     | ***         |
| 55-64                                                    | 778       | 85   | 10 | 84 85   |                          | 584       | 81   | 10 | 80 82   |                          | 280       | 74   | 11 | 73 76   |                          | -10                    | ***         | -7                     | ***         |
| 65-74                                                    | 693       | 85   | 10 | 84 85   |                          | 529       | 81   | 10 | 80 82   |                          | 278       | 74   | 11 | 72 75   |                          | -11                    | ***         | -7                     | ***         |
| Systolic blood pressure not under drug treatment (mmHg)  |           |      |    |         |                          |           |      |    |         |                          |           |      |    |         |                          |                        |             |                        |             |
| Age class (years)                                        | 1998-2002 |      |    |         | ANOVA within period sign | 2008-2012 |      |    |         | ANOVA within period sign | 2018-2019 |      |    |         | ANOVA within period sign | 2018-2019 vs 1998-2002 |             | 2018-2019 vs 2008-2012 |             |
|                                                          | n         | mean | DS | 95% CI  |                          | n         | mean | DS | 95% CI  |                          | n         | mean | DS | 95% CI  |                          | Diff                   | t-test sign | Diff                   | t-test sign |
| 35-44                                                    | 698       | 118  | 14 | 116 119 | ***                      | 499       | 114  | 12 | 113 115 | ***                      | 234       | 112  | 13 | 111 114 | ***                      | -5                     | ***         | -1                     | ns          |
| 45-54                                                    | 657       | 125  | 17 | 124 126 |                          | 510       | 120  | 15 | 119 122 |                          | 238       | 118  | 15 | 116 120 |                          | -7                     | ***         | -2                     | *           |
| 55-64                                                    | 539       | 134  | 18 | 132 135 |                          | 401       | 128  | 17 | 126 130 |                          | 203       | 123  | 17 | 121 126 |                          | -10                    | ***         | -4                     | **          |
| 65-74                                                    | 374       | 142  | 18 | 140 144 |                          | 244       | 138  | 20 | 135 140 |                          | 122       | 127  | 16 | 124 130 |                          | -15                    | ***         | -10                    | ***         |
| Diastolic blood pressure not under drug treatment (mmHg) |           |      |    |         |                          |           |      |    |         |                          |           |      |    |         |                          |                        |             |                        |             |
| Age class (years)                                        | 1998-2002 |      |    |         | ANOVA within period sign | 2008-2012 |      |    |         | ANOVA within period sign | 2018-2019 |      |    |         | ANOVA within period sign | 2018-2019 vs 1998-2002 |             | 2018-2019 vs 2008-2012 |             |
|                                                          | n         | mean | DS | 95% CI  |                          | n         | mean | DS | 95% CI  |                          | n         | mean | DS | 95% CI  |                          | Diff                   | t-test sign | Diff                   | t-test sign |
| 35-44                                                    | 698       | 77   | 10 | 76 78   | ***                      | 499       | 74   | 8  | 74 75   | ***                      | 234       | 70   | 10 | 68 71   | **                       | -8                     | ***         | -5                     | ***         |
| 45-54                                                    | 657       | 81   | 10 | 81 82   |                          | 510       | 78   | 9  | 77 79   |                          | 238       | 73   | 11 | 71 74   |                          | -9                     | ***         | -5                     | ***         |
| 55-64                                                    | 539       | 83   | 10 | 82 83   |                          | 401       | 79   | 9  | 79 80   |                          | 203       | 73   | 11 | 72 75   |                          | -9                     | ***         | -6                     | ***         |
| 65-74                                                    | 374       | 83   | 9  | 82 83   |                          | 244       | 80   | 9  | 79 81   |                          | 122       | 71   | 9  | 70 73   |                          | -11                    | ***         | -9                     | ***         |
| Heart rate (beats per minute)                            |           |      |    |         |                          |           |      |    |         |                          |           |      |    |         |                          |                        |             |                        |             |
| Age class (years)                                        | 1998-2002 |      |    |         | ANOVA within period sign | 2008-2012 |      |    |         | ANOVA within period sign | 2018-2019 |      |    |         | ANOVA within period sign | 2018-2019 vs 1998-2002 |             | 2018-2019 vs 2008-2012 |             |
|                                                          | n         | mean | DS | 95% CI  |                          | n         | mean | DS | 95% CI  |                          | n         | mean | DS | 95% CI  |                          | Diff                   | t-test sign | Diff                   | t-test sign |
| 35-44                                                    | 711       | 71   | 11 | 70 72   | **                       | 514       | 72   | 9  | 71 72   | ns                       | 237       | 74   | 11 | 73 75   | ns                       | 3                      | **          | 2                      | **          |
| 45-54                                                    | 769       | 70   | 10 | 69 71   |                          | 577       | 71   | 9  | 70 71   |                          | 271       | 73   | 10 | 72 74   |                          | 3                      | ***         | 3                      | **          |
| 55-64                                                    | 776       | 69   | 10 | 68 70   |                          | 584       | 71   | 9  | 70 72   |                          | 280       | 72   | 10 | 71 73   |                          | 3                      | ***         | 1                      | ns          |
| 65-74                                                    | 690       | 69   | 11 | 68 70   |                          | 529       | 71   | 10 | 70 72   |                          | 278       | 72   | 11 | 71 73   |                          | 3                      | **          | 1                      | ns          |

SD: standard deviation; CI: confidence interval. Diff: mean difference between 2018–2019 and 1998–2002 or 2018–2019 and 2008–2012; the values are approximated taking into account the first decimal of means. ANOVA: Analysis of Variance to compare variables among age classes within periods. t-test to compare variables between periods. \*\*\* p-value<0.0001; \*\* p-value<0.01; \*p-value<0.05; ns not significant p-value. Pool of the following Italian Regions: Piedmont, Lombardy, Liguria, Emilia Romagna, Tuscany, Lazio, Abruzzo, Basilicata, Calabria, and Sicily.

**Table S4. Blood pressure measurements and heart rate mean levels by educational level and period. Italian resident men aged 35–74 years, the CUORE Project Surveys 1998–2002, 2008–2012 and 2018–2019.**

| MEN                                                      |           |            |    |         |                                    |           |            |    |         |                                    |           |            |    |         |                                    |           |             |           |             |
|----------------------------------------------------------|-----------|------------|----|---------|------------------------------------|-----------|------------|----|---------|------------------------------------|-----------|------------|----|---------|------------------------------------|-----------|-------------|-----------|-------------|
| Systolic blood pressure (mmHg)                           |           |            |    |         |                                    |           |            |    |         |                                    |           |            |    |         |                                    |           |             |           |             |
| Educational level                                        | 1998-2002 |            |    |         | ANOVA within period<br>sign<br>*** | 2008-2012 |            |    |         | ANOVA within period<br>sign<br>*** | 2018-2019 |            |    |         | ANOVA within period<br>sign<br>*** | 2018-2019 |             | 2018-2019 |             |
|                                                          | n         | mean       | DS | 95% CI  |                                    | n         | mean       | DS | 95% CI  |                                    | n         | mean       | DS | 95% CI  |                                    | Diff      | t-test sign | Diff      | t-test sign |
| Higher education                                         | 1249      | <b>135</b> | 17 | 134 136 |                                    | 1183      | <b>130</b> | 15 | 129 131 |                                    | 725       | <b>131</b> | 14 | 130 132 | -4                                 | ***       | 1           | ns        |             |
| Lower education                                          | 1730      | <b>136</b> | 18 | 135 137 |                                    | 1018      | <b>133</b> | 17 | 132 134 |                                    | 303       | <b>134</b> | 16 | 132 135 | -3                                 | **        | 0.2         | ns        |             |
| Diastolic blood pressure (mmHg)                          |           |            |    |         |                                    |           |            |    |         |                                    |           |            |    |         |                                    |           |             |           |             |
| Educational level                                        | 1998-2002 |            |    |         | ANOVA within period<br>sign<br>ns  | 2008-2012 |            |    |         | ANOVA within period<br>sign<br>ns  | 2018-2019 |            |    |         | ANOVA within period<br>sign<br>ns  | 2018-2019 |             | 2018-2019 |             |
|                                                          | n         | mean       | DS | 95% CI  |                                    | n         | mean       | DS | 95% CI  |                                    | n         | mean       | DS | 95% CI  |                                    | Diff      | t-test sign | Diff      | t-test sign |
| Higher education                                         | 1249      | <b>87</b>  | 11 | 86 87   |                                    | 1183      | <b>83</b>  | 10 | 83 84   |                                    | 725       | <b>77</b>  | 10 | 77 78   | -9                                 | ***       | -6          | ***       |             |
| Lower education                                          | 1730      | <b>86</b>  | 11 | 86 87   |                                    | 1018      | <b>84</b>  | 10 | 83 85   |                                    | 303       | <b>78</b>  | 10 | 77 79   | -8                                 | ***       | -6          | ***       |             |
| Systolic blood pressure not under drug treatment (mmHg)  |           |            |    |         |                                    |           |            |    |         |                                    |           |            |    |         |                                    |           |             |           |             |
| Educational level                                        | 1998-2002 |            |    |         | ANOVA within period<br>sign<br>*** | 2008-2012 |            |    |         | ANOVA within period<br>sign<br>*** | 2018-2019 |            |    |         | ANOVA within period<br>sign<br>*** | 2018-2019 |             | 2018-2019 |             |
|                                                          | n         | mean       | DS | 95% CI  |                                    | n         | mean       | DS | 95% CI  |                                    | n         | mean       | DS | 95% CI  |                                    | Diff      | t-test sign | Diff      | t-test sign |
| Higher education                                         | 1046      | <b>133</b> | 16 | 132 134 |                                    | 913       | <b>129</b> | 15 | 128 130 |                                    | 537       | <b>130</b> | 13 | 129 131 | -3                                 | ***       | 1           | ns        |             |
| Lower education                                          | 1305      | <b>134</b> | 17 | 133 135 |                                    | 680       | <b>131</b> | 16 | 130 133 |                                    | 205       | <b>133</b> | 15 | 131 135 | -1                                 | ns        | 1           | ns        |             |
| Diastolic blood pressure not under drug treatment (mmHg) |           |            |    |         |                                    |           |            |    |         |                                    |           |            |    |         |                                    |           |             |           |             |
| Educational level                                        | 1998-2002 |            |    |         | ANOVA within period<br>sign<br>ns  | 2008-2012 |            |    |         | ANOVA within period<br>sign<br>ns  | 2018-2019 |            |    |         | ANOVA within period<br>sign<br>ns  | 2018-2019 |             | 2018-2019 |             |
|                                                          | n         | mean       | DS | 95% CI  |                                    | n         | mean       | DS | 95% CI  |                                    | n         | mean       | DS | 95% CI  |                                    | Diff      | t-test sign | Diff      | t-test sign |
| Higher education                                         | 1046      | <b>86</b>  | 10 | 85 86   |                                    | 913       | <b>83</b>  | 10 | 82 83   |                                    | 537       | <b>77</b>  | 10 | 76 78   | -9                                 | ***       | -6          | ***       |             |
| Lower education                                          | 1305      | <b>85</b>  | 10 | 85 86   |                                    | 680       | <b>83</b>  | 10 | 83 84   |                                    | 205       | <b>77</b>  | 9  | 76 78   | -8                                 | ***       | -6          | ***       |             |
| Heart rate (beats per minute)                            |           |            |    |         |                                    |           |            |    |         |                                    |           |            |    |         |                                    |           |             |           |             |
| Educational level                                        | 1998-2002 |            |    |         | ANOVA within period<br>sign<br>ns  | 2008-2012 |            |    |         | ANOVA within period<br>sign<br>ns  | 2018-2019 |            |    |         | ANOVA within period<br>sign<br>**  | 2018-2019 |             | 2018-2019 |             |
|                                                          | n         | mean       | DS | 95% CI  |                                    | n         | mean       | DS | 95% CI  |                                    | n         | mean       | DS | 95% CI  |                                    | Diff      | t-test sign | Diff      | t-test sign |
| Higher education                                         | 1244      | <b>66</b>  | 11 | 65 67   |                                    | 1183      | <b>68</b>  | 9  | 68 69   |                                    | 725       | <b>71</b>  | 11 | 70 72   | 5                                  | ***       | 2           | ***       |             |
| Lower education                                          | 1730      | <b>66</b>  | 11 | 65 67   |                                    | 1018      | <b>68</b>  | 10 | 68 69   |                                    | 303       | <b>74</b>  | 12 | 73 76   | 8                                  | ***       | 6           | ***       |             |

Means and standard deviations age-standardized by ISTAT Italian population 2000, 2010 and 2019 respectively. SD: standard deviation; CI: confidence interval. Diff: mean difference between 2018–2019 and 1998–2002 or 2018–2019 and 2008–2012; the values are approximated taking into account the first decimal of means. Higher education - high school or college; lower education - primary or middle school. ANOVA: Analysis of Variance to compare variables among age classes within periods. t-test to compare variables between periods. \*\*\* p-value<0.0001; \*\* p-value<0.01; \*p-value<0.05; ns not significant p-value. Pool of the following Italian Regions: Piedmont, Lombardy, Liguria, Emilia Romagna, Tuscany, Lazio, Abruzzo, Basilicata, Calabria, and Sicily.

**Table S5. Blood pressure measurements and heart rate mean levels by educational level and period. Italian resident women aged 35–74 years, the CUORE Project Surveys 1998-2002, 2008-2012 and 2018-2019.**

| WOMEN                                                    |           |      |     |         |                          |           |      |     |         |                          |           |      |     |         |                          |           |             |           |             |
|----------------------------------------------------------|-----------|------|-----|---------|--------------------------|-----------|------|-----|---------|--------------------------|-----------|------|-----|---------|--------------------------|-----------|-------------|-----------|-------------|
| Systolic blood pressure (mmHg)                           |           |      |     |         |                          |           |      |     |         |                          |           |      |     |         |                          |           |             |           |             |
| Educational level                                        | 1998-2002 |      |     |         | ANOVA within period sign | 2008-2012 |      |     |         | ANOVA within period sign | 2018-2019 |      |     |         | ANOVA within period sign | 2018-2019 |             | 2018-2019 |             |
|                                                          | n         | mean | std | 95% CI  |                          | n         | mean | std | 95% CI  |                          | n         | mean | std | 95% CI  |                          | Diff      | t-test sign | Diff      | t-test sign |
| Higher education                                         | 1052      | 130  | 16  | 129 131 | ***                      | 1167      | 124  | 15  | 123 124 | ***                      | 725       | 120  | 15  | 119 122 | ***                      | -9        | ***         | -3        | ***         |
| Lower education                                          | 1887      | 133  | 18  | 132 134 |                          | 1017      | 129  | 18  | 128 130 |                          | 339       | 126  | 17  | 124 127 |                          | -7        | ***         | -4        | **          |
| Diastolic blood pressure (mmHg)                          |           |      |     |         |                          |           |      |     |         |                          |           |      |     |         |                          |           |             |           |             |
| Educational level                                        | 1998-2002 |      |     |         | ANOVA within period sign | 2008-2012 |      |     |         | ANOVA within period sign | 2018-2019 |      |     |         | ANOVA within period sign | 2018-2019 |             | 2018-2019 |             |
|                                                          | n         | mean | std | 95% CI  |                          | n         | mean | std | 95% CI  |                          | n         | mean | std | 95% CI  |                          | Diff      | t-test sign | Diff      | t-test sign |
| Higher education                                         | 1052      | 81   | 10  | 81 82   | ***                      | 1167      | 78   | 9   | 77 78   | ***                      | 725       | 72   | 11  | 72 73   | **                       | -9        | ***         | -5        | ***         |
| Lower education                                          | 1887      | 83   | 10  | 82 83   |                          | 1017      | 79   | 10  | 79 80   |                          | 339       | 74   | 10  | 73 75   |                          | -8        | ***         | -5        | ***         |
| Systolic blood pressure not under drug treatment (mmHg)  |           |      |     |         |                          |           |      |     |         |                          |           |      |     |         |                          |           |             |           |             |
| Educational level                                        | 1998-2002 |      |     |         | ANOVA within period sign | 2008-2012 |      |     |         | ANOVA within period sign | 2018-2019 |      |     |         | ANOVA within period sign | 2018-2019 |             | 2018-2019 |             |
|                                                          | n         | mean | std | 95% CI  |                          | n         | mean | std | 95% CI  |                          | n         | mean | std | 95% CI  |                          | Diff      | t-test sign | Diff      | t-test sign |
| Higher education                                         | 928       | 128  | 16  | 127 129 | ***                      | 992       | 121  | 14  | 120 122 | ***                      | 593       | 119  | 15  | 118 120 | ***                      | -9        | ***         | -2        | **          |
| Lower education                                          | 1331      | 129  | 16  | 129 130 |                          | 651       | 127  | 16  | 126 128 |                          | 203       | 124  | 16  | 121 126 |                          | -6        | ***         | -3        | *           |
| Diastolic blood pressure not under drug treatment (mmHg) |           |      |     |         |                          |           |      |     |         |                          |           |      |     |         |                          |           |             |           |             |
| Educational level                                        | 1998-2002 |      |     |         | ANOVA within period sign | 2008-2012 |      |     |         | ANOVA within period sign | 2018-2019 |      |     |         | ANOVA within period sign | 2018-2019 |             | 2018-2019 |             |
|                                                          | n         | mean | std | 95% CI  |                          | n         | mean | std | 95% CI  |                          | n         | mean | std | 95% CI  |                          | Diff      | t-test sign | Diff      | t-test sign |
| Higher education                                         | 928       | 81   | 10  | 80 81   | ***                      | 992       | 77   | 9   | 76 78   | ***                      | 593       | 71   | 10  | 71 72   | *                        | -9        | ***         | -6        | ***         |
| Lower education                                          | 1331      | 81   | 10  | 81 82   |                          | 651       | 78   | 9   | 78 79   |                          | 203       | 73   | 10  | 72 75   |                          | -8        | ***         | -5        | ***         |
| Heart rate (beats per minute)                            |           |      |     |         |                          |           |      |     |         |                          |           |      |     |         |                          |           |             |           |             |
| Educational level                                        | 1998-2002 |      |     |         | ANOVA within period sign | 2008-2012 |      |     |         | ANOVA within period sign | 2018-2019 |      |     |         | ANOVA within period sign | 2018-2019 |             | 2018-2019 |             |
|                                                          | n         | mean | std | 95% CI  |                          | n         | mean | std | 95% CI  |                          | n         | mean | std | 95% CI  |                          | Diff      | t-test sign | Diff      | t-test sign |
| Higher education                                         | 1047      | 69   | 11  | 69 70   | ns                       | 1167      | 71   | 9   | 70 72   | ns                       | 725       | 73   | 10  | 72 73   | ns                       | 3         | ***         | 2         | **          |
| Lower education                                          | 1884      | 70   | 11  | 69 70   |                          | 1017      | 71   | 10  | 71 72   |                          | 339       | 73   | 11  | 72 74   |                          | 3         | ***         | 2         | **          |

Means and standard deviations age-standardized by ISTAT Italian population 2000, 2010 and 2019 respectively. SD: standard deviation; CI: confidence interval. Diff: mean difference between 2018–2019 and 1998–2002 or 2018–2019 and 2008–2012; the values are approximated taking into account the first decimal of means. Higher education - high school or college; lower education - primary or middle school. ANOVA: Analysis of Variance to compare variables among age classes within periods. t-test to compare variables between periods. \*\*\* p-value<0.0001; \*\* p-value<0.01; \*p-value<0.05; ns not significant p-value. Pool of the following Italian Regions: Lombardy, Piedmont, Liguria, Emilia Romagna, Tuscany, Lazio, Abruzzo, Basilicata, Calabria, and Sicily.

**Table S6. Prevalence of blood pressure treatment, raised blood pressure, hypertension and state of hypertension control based on measurements, by age class and period. Italian resident men aged 35–74 years, the CUORE Project Surveys 1998–2002, 2008–2012 and 2018–2019.**

| MEN                                  |           |    |        |                                     |           |       |        |                                     |           |      |        |                                     |                        |                  |                        |                  |
|--------------------------------------|-----------|----|--------|-------------------------------------|-----------|-------|--------|-------------------------------------|-----------|------|--------|-------------------------------------|------------------------|------------------|------------------------|------------------|
| Blood pressure drug treatment        |           |    |        |                                     |           |       |        |                                     |           |      |        |                                     |                        |                  |                        |                  |
| Age class (years)                    | 1998–2002 |    |        | Chi-squared test within period sign | 2008–2012 |       |        | Chi-squared test within period sign | 2018–2019 |      |        | Chi-squared test within period sign | 2018–2019 vs 1998–2002 |                  | 2018–2019 vs 2008–2012 |                  |
|                                      | n         | %  | 95% CI |                                     | n         | %     | 95% CI |                                     | n         | %    | 95% CI |                                     | Diff                   | chi-squared sign | Diff                   | chi-squared sign |
|                                      |           |    |        |                                     |           |       |        |                                     |           |      |        |                                     |                        |                  |                        |                  |
| 35–44                                | 717       | 5  | 3 6    | 530                                 | 5         | 3 7   | 248    | 4                                   | 2 7       | -0.4 | ns     | -0.5                                | ns                     |                  |                        |                  |
| 45–54                                | 752       | 15 | 12 17  | 588                                 | 18        | 15 21 | 248    | 15                                  | 10 19     | -0.4 | ns     | -4                                  | ns                     |                  |                        |                  |
| 55–64                                | 784       | 26 | 23 29  | 564                                 | 34        | 30 38 | 277    | 39                                  | 33 44     | 13   | ***    | 4                                   | ns                     |                  |                        |                  |
| 65–74                                | 732       | 38 | 34 41  | 536                                 | 53        | 49 57 | 258    | 52                                  | 45 58     | 14   | **     | -1                                  | ns                     |                  |                        |                  |
| Raised blood pressure                |           |    |        |                                     |           |       |        |                                     |           |      |        |                                     |                        |                  |                        |                  |
| Age class (years)                    | 1998–2002 |    |        | Chi-squared test within period sign | 2008–2012 |       |        | Chi-squared test within period sign | 2018–2019 |      |        | Chi-squared test within period sign | 2018–2019 vs 1998–2002 |                  | 2018–2019 vs 2008–2012 |                  |
|                                      | n         | %  | 95% CI |                                     | n         | %     | 95% CI |                                     | n         | %    | 95% CI |                                     | Diff                   | chi-squared sign | Diff                   | chi-squared sign |
|                                      |           |    |        |                                     |           |       |        |                                     |           |      |        |                                     |                        |                  |                        |                  |
| 35–44                                | 717       | 33 | 30 37  | 530                                 | 26        | 22 29 | 248    | 19                                  | 14 23     | -15  | ***    | -7                                  | *                      |                  |                        |                  |
| 45–54                                | 752       | 46 | 43 50  | 588                                 | 40        | 36 44 | 248    | 26                                  | 20 31     | -21  | ***    | -14                                 | ***                    |                  |                        |                  |
| 55–64                                | 784       | 59 | 56 63  | 564                                 | 46        | 41 50 | 277    | 35                                  | 29 40     | -25  | ***    | -11                                 | **                     |                  |                        |                  |
| 65–74                                | 732       | 70 | 67 73  | 536                                 | 55        | 51 60 | 258    | 43                                  | 37 49     | -27  | ***    | -12                                 | **                     |                  |                        |                  |
| Hypertension                         |           |    |        |                                     |           |       |        |                                     |           |      |        |                                     |                        |                  |                        |                  |
| Age class (years)                    | 1998–2002 |    |        | Chi-squared test within period sign | 2008–2012 |       |        | Chi-squared test within period sign | 2018–2019 |      |        | Chi-squared test within period sign | 2018–2019 vs 1998–2002 |                  | 2018–2019 vs 2008–2012 |                  |
|                                      | n         | %  | 95% CI |                                     | n         | %     | 95% CI |                                     | n         | %    | 95% CI |                                     | Diff                   | chi-squared sign | Diff                   | chi-squared sign |
|                                      |           |    |        |                                     |           |       |        |                                     |           |      |        |                                     |                        |                  |                        |                  |
| 35–44                                | 717       | 35 | 31 38  | 530                                 | 28        | 24 32 | 248    | 21                                  | 16 26     | -14  | ***    | -7                                  | *                      |                  |                        |                  |
| 45–54                                | 752       | 51 | 47 54  | 588                                 | 46        | 42 50 | 248    | 32                                  | 26 38     | -19  | ***    | -14                                 | **                     |                  |                        |                  |
| 55–64                                | 784       | 64 | 61 68  | 564                                 | 62        | 58 66 | 277    | 58                                  | 53 64     | -6   | ns     | -3                                  | ns                     |                  |                        |                  |
| 65–74                                | 732       | 76 | 72 79  | 536                                 | 76        | 72 80 | 258    | 74                                  | 69 79     | -2   | ns     | -2                                  | ns                     |                  |                        |                  |
| Undiagnosed hypertension             |           |    |        |                                     |           |       |        |                                     |           |      |        |                                     |                        |                  |                        |                  |
| Age class (years)                    | 1998–2002 |    |        | Chi-squared test within period sign | 2008–2012 |       |        | Chi-squared test within period sign | 2018–2019 |      |        | Chi-squared test within period sign | 2018–2019 vs 1998–2002 |                  | 2018–2019 vs 2008–2012 |                  |
|                                      | n         | %  | 95% CI |                                     | n         | %     | 95% CI |                                     | n         | %    | 95% CI |                                     | Diff                   | chi-squared sign | Diff                   | chi-squared sign |
|                                      |           |    |        |                                     |           |       |        |                                     |           |      |        |                                     |                        |                  |                        |                  |
| 35–44                                | 249       | 67 | 62 73  | 149                                 | 54        | 46 62 | 52     | 62                                  | 48 75     | -6   | ns     | 8                                   | ns                     |                  |                        |                  |
| 45–54                                | 380       | 52 | 47 57  | 269                                 | 40        | 34 46 | 79     | 35                                  | 25 46     | -16  | **     | -4                                  | ns                     |                  |                        |                  |
| 55–64                                | 505       | 48 | 44 52  | 349                                 | 32        | 27 37 | 162    | 23                                  | 17 30     | -25  | ***    | -8                                  | ns                     |                  |                        |                  |
| 65–74                                | 553       | 39 | 35 43  | 407                                 | 25        | 20 29 | 191    | 21                                  | 16 27     | -18  | ***    | -3                                  | ns                     |                  |                        |                  |
| Diagnosed but untreated hypertension |           |    |        |                                     |           |       |        |                                     |           |      |        |                                     |                        |                  |                        |                  |
| Age class (years)                    | 1998–2002 |    |        | Chi-squared test within period sign | 2008–2012 |       |        | Chi-squared test within period sign | 2018–2019 |      |        | Chi-squared test within period sign | 2018–2019 vs 1998–2002 |                  | 2018–2019 vs 2008–2012 |                  |
|                                      | n         | %  | 95% CI |                                     | n         | %     | 95% CI |                                     | n         | %    | 95% CI |                                     | Diff                   | chi-squared sign | Diff                   | chi-squared sign |
|                                      |           |    |        |                                     |           |       |        |                                     |           |      |        |                                     |                        |                  |                        |                  |
| 35–44                                | 249       | 18 | 14 23  | 149                                 | 29        | 22 36 | 52     | 17                                  | 7 28      | -1   | ns     | -12                                 | ns                     |                  |                        |                  |
| 45–54                                | 380       | 19 | 15 23  | 269                                 | 20        | 16 25 | 79     | 19                                  | 10 28     | 0.0  | ns     | -1                                  | ns                     |                  |                        |                  |
| 55–64                                | 505       | 12 | 9 14   | 349                                 | 13        | 9 16  | 162    | 10                                  | 6 15      | -1   | ns     | -2                                  | ns                     |                  |                        |                  |
| 65–74                                | 553       | 10 | 8 13   | 407                                 | 6         | 3 8   | 191    | 9                                   | 5 13      | -1   | ns     | 3                                   | ns                     |                  |                        |                  |
| Uncontrolled hypertension            |           |    |        |                                     |           |       |        |                                     |           |      |        |                                     |                        |                  |                        |                  |
| Age class (years)                    | 1998–2002 |    |        | Chi-squared test within period sign | 2008–2012 |       |        | Chi-squared test within period sign | 2018–2019 |      |        | Chi-squared test within period sign | 2018–2019 vs 1998–2002 |                  | 2018–2019 vs 2008–2012 |                  |
|                                      | n         | %  | 95% CI |                                     | n         | %     | 95% CI |                                     | n         | %    | 95% CI |                                     | Diff                   | chi-squared sign | Diff                   | chi-squared sign |
|                                      |           |    |        |                                     |           |       |        |                                     |           |      |        |                                     |                        |                  |                        |                  |
| 35–44                                | 249       | 10 | 7 14   | 149                                 | 9         | 4 13  | 52     | 10                                  | 2 18      | -1   | ns     | 1                                   | ns                     |                  |                        |                  |
| 45–54                                | 380       | 21 | 17 25  | 269                                 | 27        | 22 32 | 79     | 27                                  | 17 36     | 5    | ns     | -1                                  | ns                     |                  |                        |                  |
| 55–64                                | 505       | 32 | 28 37  | 349                                 | 29        | 24 34 | 162    | 25                                  | 19 32     | -7   | ns     | -4                                  | ns                     |                  |                        |                  |
| 65–74                                | 553       | 43 | 39 47  | 407                                 | 43        | 38 48 | 191    | 28                                  | 22 35     | -15  | **     | -14                                 | **                     |                  |                        |                  |
| Controlled hypertension              |           |    |        |                                     |           |       |        |                                     |           |      |        |                                     |                        |                  |                        |                  |
| Age class (years)                    | 1998–2002 |    |        | Chi-squared test within period sign | 2008–2012 |       |        | Chi-squared test within period sign | 2018–2019 |      |        | Chi-squared test within period sign | 2018–2019 vs 1998–2002 |                  | 2018–2019 vs 2008–2012 |                  |
|                                      | n         | %  | 95% CI |                                     | n         | %     | 95% CI |                                     | n         | %    | 95% CI |                                     | Diff                   | chi-squared sign | Diff                   | chi-squared sign |
|                                      |           |    |        |                                     |           |       |        |                                     |           |      |        |                                     |                        |                  |                        |                  |
| 35–44                                | 249       | 4  | 1 6    | 149                                 | 9         | 4 13  | 52     | 12                                  | 3 20      | 8    | *      | 3                                   | ns                     |                  |                        |                  |
| 45–54                                | 380       | 8  | 5 11   | 269                                 | 13        | 9 17  | 79     | 19                                  | 10 28     | 11   | **     | 6                                   | ns                     |                  |                        |                  |
| 55–64                                | 505       | 8  | 5 10   | 349                                 | 26        | 22 31 | 162    | 41                                  | 33 48     | 33   | ***    | 14                                  | **                     |                  |                        |                  |
| 65–74                                | 553       | 7  | 5 9    | 407                                 | 27        | 23 31 | 191    | 41                                  | 34 48     | 34   | ***    | 14                                  | **                     |                  |                        |                  |

CI: confidence interval. Diff: prevalence difference between 2018–2019 and 1998–2002 or 2018–2019 and 2008–2012; the values are approximated taking into account the first decimal of prevalence. Chi-squared test to compare prevalences between periods and among age classes within the period. Raised blood pressure: systolic blood pressure  $\geq 140$  mmHg and/or diastolic blood pressure  $\geq 90$  mmHg. Hypertension: systolic blood pressure  $\geq 140$  mmHg and/or diastolic blood pressure  $\geq 90$  mmHg and/or under specific pharmacological treatment. Hypertension is divided into 'undiagnosed', 'diagnosed but untreated', 'uncontrolled' (treated and SBP  $\geq 140$  mmHg or DBP  $\geq 90$  mmHg) and 'controlled' (treated and SBP  $< 140$  mmHg and DBP  $< 90$  mmHg). Pool of the following Italian Regions: Piedmont, Lombardy, Liguria, Emilia Romagna, Tuscany, Lazio, Abruzzo, Basilicata, Calabria, and Sicily.



**Table S7. Prevalence of blood pressure treatment, raised blood pressure, hypertension and state of hypertension control based on measurements, by age class and period. Italian resident women aged 35–74 years, the CUORE Project Surveys 1998-2002, 2008-2012 and 2018-2019.**

| WOMEN                                |           |    |        |                                            |           |    |        |                                            |           |    |        |                        |                  |                        |                  |
|--------------------------------------|-----------|----|--------|--------------------------------------------|-----------|----|--------|--------------------------------------------|-----------|----|--------|------------------------|------------------|------------------------|------------------|
| Blood pressure drug treatment        |           |    |        |                                            |           |    |        |                                            |           |    |        |                        |                  |                        |                  |
| Age class (years)                    | 1998-2002 |    |        | Chi-squared test within period sign<br>*** | 2008-2012 |    |        | Chi-squared test within period sign<br>*** | 2018-2019 |    |        | 2018-2019 vs 1998-2002 |                  | 2018-2019 vs 2008-2012 |                  |
|                                      | n         | %  | 95% CI |                                            | n         | %  | 95% CI |                                            | n         | %  | 95% CI | Diff                   | chi-squared sign | Diff                   | chi-squared sign |
| 35-44                                | 715       | 2  | 1 3    |                                            | 514       | 3  | 1 4    |                                            | 237       | 1  | 0 3    | -1                     | ns               | -2                     | ns               |
| 45-54                                | 769       | 15 | 12 17  |                                            | 577       | 12 | 9 14   |                                            | 271       | 12 | 8 16   | -2                     | ns               | 1                      | ns               |
| 55-64                                | 778       | 31 | 27 34  |                                            | 584       | 31 | 28 35  |                                            | 280       | 28 | 22 33  | -3                     | ns               | -4                     | ns               |
| 65-74                                | 693       | 46 | 42 50  |                                            | 529       | 54 | 50 58  |                                            | 278       | 56 | 50 62  | 10                     | **               | 2                      | ns               |
| Raised blood pressure                |           |    |        |                                            |           |    |        |                                            |           |    |        |                        |                  |                        |                  |
| Age class (years)                    | 1998-2002 |    |        | Chi-squared test within period sign<br>*** | 2008-2012 |    |        | Chi-squared test within period sign<br>*** | 2018-2019 |    |        | 2018-2019 vs 1998-2002 |                  | 2018-2019 vs 2008-2012 |                  |
|                                      | n         | %  | 95% CI |                                            | n         | %  | 95% CI |                                            | n         | %  | 95% CI | Diff                   | chi-squared sign | Diff                   | chi-squared sign |
| 35-44                                | 715       | 15 | 12 17  |                                            | 514       | 6  | 4 9    |                                            | 237       | 5  | 2 8    | -9                     | **               | -1                     | ns               |
| 45-54                                | 769       | 33 | 30 37  |                                            | 577       | 18 | 15 21  |                                            | 271       | 13 | 9 16   | -21                    | ***              | -5                     | *                |
| 55-64                                | 778       | 50 | 47 54  |                                            | 584       | 34 | 30 38  |                                            | 280       | 20 | 15 25  | -30                    | ***              | -14                    | ***              |
| 65-74                                | 693       | 68 | 65 72  |                                            | 529       | 54 | 50 58  |                                            | 278       | 31 | 25 36  | -38                    | ***              | -23                    | ***              |
| Hypertension                         |           |    |        |                                            |           |    |        |                                            |           |    |        |                        |                  |                        |                  |
| Age class (years)                    | 1998-2002 |    |        | Chi-squared test within period sign<br>*** | 2008-2012 |    |        | Chi-squared test within period sign<br>*** | 2018-2019 |    |        | 2018-2019 vs 1998-2002 |                  | 2018-2019 vs 2008-2012 |                  |
|                                      | n         | %  | 95% CI |                                            | n         | %  | 95% CI |                                            | n         | %  | 95% CI | Diff                   | chi-squared sign | Diff                   | chi-squared sign |
| 35-44                                | 715       | 15 | 13 18  |                                            | 514       | 8  | 6 11   |                                            | 237       | 6  | 3 9    | -9                     | **               | -2                     | ns               |
| 45-54                                | 769       | 38 | 35 41  |                                            | 577       | 25 | 21 28  |                                            | 271       | 21 | 17 26  | -17                    | ***              | -4                     | ns               |
| 55-64                                | 778       | 58 | 55 61  |                                            | 584       | 49 | 45 53  |                                            | 280       | 40 | 35 46  | -18                    | ***              | -8                     | *                |
| 65-74                                | 693       | 77 | 74 80  |                                            | 529       | 73 | 69 76  |                                            | 278       | 64 | 59 70  | -12                    | ***              | -8                     | *                |
| Undiagnosed hypertension             |           |    |        |                                            |           |    |        |                                            |           |    |        |                        |                  |                        |                  |
| Age class (years)                    | 1998-2002 |    |        | Chi-squared test within period sign<br>*** | 2008-2012 |    |        | Chi-squared test within period sign<br>*** | 2018-2019 |    |        | 2018-2019 vs 1998-2002 |                  | 2018-2019 vs 2008-2012 |                  |
|                                      | n         | %  | 95% CI |                                            | n         | %  | 95% CI |                                            | n         | %  | 95% CI | Diff                   | chi-squared sign | Diff                   | chi-squared sign |
| 35-44                                | 110       | 62 | 53 71  |                                            | 43        | 40 | 25 54  |                                            | 15        | 47 | 21 72  | -15                    | ns               | 7                      | ns               |
| 45-54                                | 292       | 45 | 40 51  |                                            | 144       | 39 | 31 47  |                                            | 58        | 29 | 18 41  | -16                    | *                | -10                    | ns               |
| 55-64                                | 451       | 33 | 29 38  |                                            | 285       | 24 | 19 28  |                                            | 113       | 21 | 14 29  | -12                    | *                | -2                     | ns               |
| 65-74                                | 532       | 32 | 28 36  |                                            | 384       | 20 | 16 23  |                                            | 179       | 11 | 6 15   | -22                    | ***              | -9                     | **               |
| Diagnosed but untreated hypertension |           |    |        |                                            |           |    |        |                                            |           |    |        |                        |                  |                        |                  |
| Age class (years)                    | 1998-2002 |    |        | Chi-squared test within period sign<br>*** | 2008-2012 |    |        | Chi-squared test within period sign<br>**  | 2018-2019 |    |        | 2018-2019 vs 1998-2002 |                  | 2018-2019 vs 2008-2012 |                  |
|                                      | n         | %  | 95% CI |                                            | n         | %  | 95% CI |                                            | n         | %  | 95% CI | Diff                   | chi-squared sign | Diff                   | chi-squared sign |
| 35-44                                | 110       | 23 | 15 31  |                                            | 43        | 26 | 13 39  |                                            | 15        | 33 | 9 57   | 11                     | ns               | 8                      | ns               |
| 45-54                                | 292       | 16 | 12 21  |                                            | 144       | 15 | 9 20   |                                            | 58        | 14 | 5 23   | -3                     | ns               | -1                     | ns               |
| 55-64                                | 451       | 14 | 10 17  |                                            | 285       | 12 | 8 16   |                                            | 113       | 11 | 5 16   | -3                     | ns               | -2                     | ns               |
| 65-74                                | 532       | 8  | 6 10   |                                            | 384       | 6  | 4 9    |                                            | 179       | 2  | 0 4    | -6                     | ***              | -4                     | ***              |
| Uncontrolled hypertension            |           |    |        |                                            |           |    |        |                                            |           |    |        |                        |                  |                        |                  |
| Age class (years)                    | 1998-2002 |    |        | Chi-squared test within period sign<br>*** | 2008-2012 |    |        | Chi-squared test within period sign<br>*** | 2018-2019 |    |        | 2018-2019 vs 1998-2002 |                  | 2018-2019 vs 2008-2012 |                  |
|                                      | n         | %  | 95% CI |                                            | n         | %  | 95% CI |                                            | n         | %  | 95% CI | Diff                   | chi-squared sign | Diff                   | chi-squared sign |
| 35-44                                | 110       | 10 | 4 16   |                                            | 43        | 12 | 2 21   |                                            | 15        | 0  | 0 0    | -10                    | -                | -12                    | -                |
| 45-54                                | 292       | 26 | 21 31  |                                            | 144       | 19 | 12 25  |                                            | 58        | 16 | 6 25   | -11                    | ns               | -3                     | ns               |
| 55-64                                | 451       | 39 | 35 44  |                                            | 285       | 33 | 28 39  |                                            | 113       | 18 | 11 25  | -22                    | ***              | -16                    | **               |
| 65-74                                | 532       | 49 | 45 53  |                                            | 384       | 48 | 43 53  |                                            | 179       | 35 | 28 42  | -14                    | ***              | -14                    | ***              |
| Controlled hypertension              |           |    |        |                                            |           |    |        |                                            |           |    |        |                        |                  |                        |                  |
| Age class (years)                    | 1998-2002 |    |        | Chi-squared test within period sign<br>ns  | 2008-2012 |    |        | Chi-squared test within period sign<br>ns  | 2018-2019 |    |        | 2018-2019 vs 1998-2002 |                  | 2018-2019 vs 2008-2012 |                  |
|                                      | n         | %  | 95% CI |                                            | n         | %  | 95% CI |                                            | n         | %  | 95% CI | Diff                   | chi-squared sign | Diff                   | chi-squared sign |
| 35-44                                | 110       | 5  | 1 10   |                                            | 43        | 23 | 11 36  |                                            | 15        | 20 | 0 40   | 15                     | *                | -3                     | ns               |
| 45-54                                | 292       | 12 | 8 16   |                                            | 144       | 28 | 20 35  |                                            | 58        | 41 | 29 54  | 29                     | ***              | 14                     | ns               |
| 55-64                                | 451       | 14 | 10 17  |                                            | 285       | 31 | 26 36  |                                            | 113       | 50 | 41 60  | 37                     | ***              | 20                     | **               |
| 65-74                                | 532       | 11 | 8 14   |                                            | 384       | 26 | 21 30  |                                            | 179       | 53 | 45 60  | 41                     | ***              | 27                     | *                |

CI: confidence interval. Diff: prevalence difference between 2018–2019 and 1998–2002 or 2018–2019 and 2008–2012; the values are approximated taking into account the first decimal of prevalence. Chi-squared test to compare prevalences between periods and among age classes within the period. Raised blood pressure: systolic blood pressure  $\geq 140$  mmHg and/or diastolic blood pressure  $\geq 90$  mmHg. Hypertension: systolic blood pressure  $\geq 140$  mmHg and/or diastolic blood pressure  $\geq 90$  mmHg and/or under specific pharmacological treatment. Hypertension is divided into 'undiagnosed', 'diagnosed but untreated', 'uncontrolled' (treated and SBP  $\geq 140$  mmHg or DBP  $\geq 90$  mmHg) and 'controlled' (treated and SBP  $< 140$  mmHg and DBP  $< 90$  mmHg). Pool of the following Italian Regions: Piedmont, Lombardy, Liguria, Emilia Romagna, Tuscany, Lazio, Abruzzo, Basilicata, Calabria, and Sicily.

**Table S8. Prevalence of blood pressure treatment, raised blood pressure, hypertension and state of hypertension control based on measurements, by educational class and period. Italian resident men aged 35–74 years, the CUORE Project Surveys 1998–2002, 2008–2012 and 2018–2019.**

| MEN                                  |           |    |        |                                     |           |    |        |                                     |           |    |        |                                     |                        |                  |                        |                  |
|--------------------------------------|-----------|----|--------|-------------------------------------|-----------|----|--------|-------------------------------------|-----------|----|--------|-------------------------------------|------------------------|------------------|------------------------|------------------|
| Blood pressure drug treatment        |           |    |        |                                     |           |    |        |                                     |           |    |        |                                     |                        |                  |                        |                  |
| Educational level                    | 1998–2002 |    |        | Chi-squared test within period sign | 2008–2012 |    |        | Chi-squared test within period sign | 2018–2019 |    |        | Chi-squared test within period sign | 2018–2019 vs 1998–2002 |                  | 2018–2019 vs 2008–2012 |                  |
|                                      | n         | %  | 95% CI |                                     | n         | %  | 95% CI |                                     | n         | %  | 95% CI |                                     | Diff                   | chi-squared sign | Diff                   | chi-squared sign |
| Higher education                     | 1249      | 18 | 16 20  | ns                                  | 1183      | 24 | 22 27  | ns                                  | 725       | 26 | 23 29  | ns                                  | 8                      | ***              | 2                      | ns               |
| Lower education                      | 1730      | 19 | 18 21  |                                     | 1018      | 25 | 22 28  |                                     | 303       | 24 | 19 29  |                                     | 5                      | ns               | -1                     | ns               |
| Raised blood pressure                |           |    |        |                                     |           |    |        |                                     |           |    |        |                                     |                        |                  |                        |                  |
| Educational level                    | 1998–2002 |    |        | Chi-squared test within period sign | 2008–2012 |    |        | Chi-squared test within period sign | 2018–2019 |    |        | Chi-squared test within period sign | 2018–2019 vs 1998–2002 |                  | 2018–2019 vs 2008–2012 |                  |
|                                      | n         | %  | 95% CI |                                     | n         | %  | 95% CI |                                     | n         | %  | 95% CI |                                     | Diff                   | chi-squared sign | Diff                   | chi-squared sign |
| Higher education                     | 1249      | 48 | 45 51  | ns                                  | 1183      | 35 | 33 38  | **                                  | 725       | 28 | 25 31  | ns                                  | -20                    | ***              | -7                     | **               |
| Lower education                      | 1730      | 51 | 49 54  |                                     | 1018      | 43 | 40 46  |                                     | 303       | 34 | 29 39  |                                     | -17                    | ***              | -9                     | **               |
| Hypertension                         |           |    |        |                                     |           |    |        |                                     |           |    |        |                                     |                        |                  |                        |                  |
| Educational level                    | 1998–2002 |    |        | Chi-squared test within period sign | 2008–2012 |    |        | Chi-squared test within period sign | 2018–2019 |    |        | Chi-squared test within period sign | 2018–2019 vs 1998–2002 |                  | 2018–2019 vs 2008–2012 |                  |
|                                      | n         | %  | 95% CI |                                     | n         | %  | 95% CI |                                     | n         | %  | 95% CI |                                     | Diff                   | chi-squared sign | Diff                   | chi-squared sign |
| Higher education                     | 1249      | 51 | 49 54  | *                                   | 1183      | 48 | 45 51  | ns                                  | 725       | 43 | 40 47  | ns                                  | -8                     | **               | -4                     | ns               |
| Lower education                      | 1730      | 55 | 53 58  |                                     | 1018      | 51 | 48 54  |                                     | 303       | 46 | 40 52  |                                     | -9                     | **               | -5                     | ns               |
| Undiagnosed hypertension             |           |    |        |                                     |           |    |        |                                     |           |    |        |                                     |                        |                  |                        |                  |
| Educational level                    | 1998–2002 |    |        | Chi-squared test within period sign | 2008–2012 |    |        | Chi-squared test within period sign | 2018–2019 |    |        | Chi-squared test within period sign | 2018–2019 vs 1998–2002 |                  | 2018–2019 vs 2008–2012 |                  |
|                                      | n         | %  | 95% CI |                                     | n         | %  | 95% CI |                                     | n         | %  | 95% CI |                                     | Diff                   | chi-squared sign | Diff                   | chi-squared sign |
| Higher education                     | 621       | 53 | 49 57  | ns                                  | 555       | 38 | 34 42  | ns                                  | 314       | 36 | 30 41  | ns                                  | -18                    | ***              | -2                     | ns               |
| Lower education                      | 1063      | 54 | 51 57  |                                     | 610       | 40 | 36 44  |                                     | 168       | 38 | 30 45  |                                     | -16                    | **               | -2                     | ns               |
| Diagnosed but untreated hypertension |           |    |        |                                     |           |    |        |                                     |           |    |        |                                     |                        |                  |                        |                  |
| Educational level                    | 1998–2002 |    |        | Chi-squared test within period sign | 2008–2012 |    |        | Chi-squared test within period sign | 2018–2019 |    |        | Chi-squared test within period sign | 2018–2019 vs 1998–2002 |                  | 2018–2019 vs 2008–2012 |                  |
|                                      | n         | %  | 95% CI |                                     | n         | %  | 95% CI |                                     | n         | %  | 95% CI |                                     | Diff                   | chi-squared sign | Diff                   | chi-squared sign |
| Higher education                     | 621       | 16 | 13 19  | ns                                  | 555       | 20 | 17 23  | ns                                  | 314       | 13 | 10 17  | ns                                  | -3                     | ns               | -6                     | *                |
| Lower education                      | 1063      | 15 | 13 17  |                                     | 610       | 16 | 13 19  |                                     | 168       | 16 | 10 21  |                                     | 1                      | ***              | -0.4                   | ns               |
| Uncontrolled hypertension            |           |    |        |                                     |           |    |        |                                     |           |    |        |                                     |                        |                  |                        |                  |
| Educational level                    | 1998–2002 |    |        | Chi-squared test within period sign | 2008–2012 |    |        | Chi-squared test within period sign | 2018–2019 |    |        | Chi-squared test within period sign | 2018–2019 vs 1998–2002 |                  | 2018–2019 vs 2008–2012 |                  |
|                                      | n         | %  | 95% CI |                                     | n         | %  | 95% CI |                                     | n         | %  | 95% CI |                                     | Diff                   | chi-squared sign | Diff                   | chi-squared sign |
| Higher education                     | 621       | 24 | 21 28  | ns                                  | 555       | 21 | 18 25  | **                                  | 314       | 21 | 17 26  | ns                                  | -3                     | ns               | 0.1                    | ns               |
| Lower education                      | 1063      | 25 | 22 27  |                                     | 610       | 29 | 25 32  |                                     | 168       | 26 | 20 33  |                                     | 2                      | ***              | -2                     | ns               |
| Controlled hypertension              |           |    |        |                                     |           |    |        |                                     |           |    |        |                                     |                        |                  |                        |                  |
| Educational level                    | 1998–2002 |    |        | Chi-squared test within period sign | 2008–2012 |    |        | Chi-squared test within period sign | 2018–2019 |    |        | Chi-squared test within period sign | 2018–2019 vs 1998–2002 |                  | 2018–2019 vs 2008–2012 |                  |
|                                      | n         | %  | 95% CI |                                     | n         | %  | 95% CI |                                     | n         | %  | 95% CI |                                     | Diff                   | chi-squared sign | Diff                   | chi-squared sign |
| Higher education                     | 621       | 6  | 4 8    | ns                                  | 555       | 21 | 18 25  | **                                  | 314       | 30 | 25 35  | *                                   | 24                     | ***              | 8                      | **               |
| Lower education                      | 1063      | 7  | 5 8    |                                     | 610       | 15 | 12 18  |                                     | 168       | 20 | 14 26  |                                     | 13                     | **               | 5                      | ns               |

Prevalence are age-standardized by ISTAT Italian population 2000, 2010 and 2019 respectively. CI: confidence interval. Diff: prevalence difference between 2018–2019 and 1998–2002 or 2018–2019 and 2008–2012; the values are approximated taking into account the first decimal of prevalence. Higher education - high school or college; lower education - primary or middle school. Chi-squared test to compare prevalences between periods and among age classes within the period. Raised blood pressure: systolic blood pressure  $\geq 140$  mmHg and/or diastolic blood pressure  $\geq 90$  mmHg. Hypertension: systolic blood pressure  $\geq 140$  mmHg and/or diastolic blood pressure  $\geq 90$  mmHg and/or under specific pharmacological treatment. Hypertension is divided into 'undiagnosed', 'diagnosed but untreated', 'uncontrolled' (treated and SBP  $\geq 140$  mmHg or DBP  $\geq 90$  mmHg) and 'controlled' (treated and SBP  $< 140$  mmHg and DBP  $< 90$  mmHg). Pool of the following Italian Regions: Piedmont, Lombardy, Liguria, Emilia Romagna, Tuscany, Lazio, Abruzzo, Basilicata, Calabria, and Sicily.



**Table S9. Prevalence of blood pressure treatment, raised blood pressure, hypertension and state of hypertension control based on measurements, by educational class and period. Italian resident women aged 35–74 years, the CUORE Project Surveys 1998-2002, 2008-2012 and 2018-2019.**

| WOMEN                                |           |    |        |                                     |           |    |        |                                     |           |    |        |                        |                  |                        |                  |
|--------------------------------------|-----------|----|--------|-------------------------------------|-----------|----|--------|-------------------------------------|-----------|----|--------|------------------------|------------------|------------------------|------------------|
| Blood pressure drug treatment        |           |    |        |                                     |           |    |        |                                     |           |    |        |                        |                  |                        |                  |
| Educational level                    | 1998-2002 |    |        | Chi-squared test within period sign | 2008-2012 |    |        | Chi-squared test within period sign | 2018-2019 |    |        | 2018-2019 vs 1998-2002 |                  | 2018-2019 vs 2008-2012 |                  |
|                                      | n         | %  | 95% CI |                                     | n         | %  | 95% CI |                                     | n         | %  | 95% CI | Diff                   | chi-squared sign | Diff                   | chi-squared sign |
| Higher education                     | 1052      | 16 | 14 19  | ***                                 | 1167      | 19 | 16 21  | ***                                 | 725       | 19 | 17 22  | 3                      | ns               | 1                      | ns               |
| Lower education                      | 1887      | 23 | 22 25  |                                     | 1017      | 26 | 23 28  |                                     | 339       | 27 | 23 32  | 4                      | ns               | 2                      | ns               |
|                                      |           |    |        |                                     |           |    |        |                                     |           |    |        |                        |                  |                        |                  |
| Raised blood pressure                |           |    |        |                                     |           |    |        |                                     |           |    |        |                        |                  |                        |                  |
| Educational level                    | 1998-2002 |    |        | Chi-squared test within period sign | 2008-2012 |    |        | Chi-squared test within period sign | 2018-2019 |    |        | 2018-2019 vs 1998-2002 |                  | 2018-2019 vs 2008-2012 |                  |
|                                      | n         | %  | 95% CI |                                     | n         | %  | 95% CI |                                     | n         | %  | 95% CI | Diff                   | chi-squared sign | Diff                   | chi-squared sign |
| Higher education                     | 1052      | 35 | 32 38  | **                                  | 1167      | 22 | 19 24  | ***                                 | 725       | 14 | 12 17  | -21                    | ***              | -7                     | ***              |
| Lower education                      | 1887      | 42 | 40 44  |                                     | 1017      | 29 | 26 32  |                                     | 339       | 21 | 17 25  | -21                    | ***              | -8                     | **               |
|                                      |           |    |        |                                     |           |    |        |                                     |           |    |        |                        |                  |                        |                  |
| Hypertension                         |           |    |        |                                     |           |    |        |                                     |           |    |        |                        |                  |                        |                  |
| Educational level                    | 1998-2002 |    |        | Chi-squared test within period sign | 2008-2012 |    |        | Chi-squared test within period sign | 2018-2019 |    |        | 2018-2019 vs 1998-2002 |                  | 2018-2019 vs 2008-2012 |                  |
|                                      | n         | %  | 95% CI |                                     | n         | %  | 95% CI |                                     | n         | %  | 95% CI | Diff                   | chi-squared sign | Diff                   | chi-squared sign |
| Higher education                     | 1052      | 40 | 37 43  | **                                  | 1167      | 31 | 28 34  | ***                                 | 725       | 28 | 25 31  | -12                    | ***              | -3                     | ns               |
| Lower education                      | 1887      | 47 | 45 49  |                                     | 1017      | 40 | 37 43  |                                     | 339       | 39 | 34 44  | -8                     | **               | -1                     | ns               |
|                                      |           |    |        |                                     |           |    |        |                                     |           |    |        |                        |                  |                        |                  |
| Undiagnosed hypertension             |           |    |        |                                     |           |    |        |                                     |           |    |        |                        |                  |                        |                  |
| Educational level                    | 1998-2002 |    |        | Chi-squared test within period sign | 2008-2012 |    |        | Chi-squared test within period sign | 2018-2019 |    |        | 2018-2019 vs 1998-2002 |                  | 2018-2019 vs 2008-2012 |                  |
|                                      | n         | %  | 95% CI |                                     | n         | %  | 95% CI |                                     | n         | %  | 95% CI | Diff                   | chi-squared sign | Diff                   | chi-squared sign |
| Higher education                     | 337       | 47 | 42 53  | ns                                  | 311       | 36 | 31 42  | **                                  | 192       | 27 | 21 34  | -20                    | ***              | -9                     | *                |
| Lower education                      | 1037      | 43 | 40 46  |                                     | 534       | 25 | 21 28  |                                     | 172       | 29 | 23 36  | -14                    | **               | 5                      | ns               |
|                                      |           |    |        |                                     |           |    |        |                                     |           |    |        |                        |                  |                        |                  |
| Diagnosed but untreated hypertension |           |    |        |                                     |           |    |        |                                     |           |    |        |                        |                  |                        |                  |
| Educational level                    | 1998-2002 |    |        | Chi-squared test within period sign | 2008-2012 |    |        | Chi-squared test within period sign | 2018-2019 |    |        | 2018-2019 vs 1998-2002 |                  | 2018-2019 vs 2008-2012 |                  |
|                                      | n         | %  | 95% CI |                                     | n         | %  | 95% CI |                                     | n         | %  | 95% CI | Diff                   | chi-squared sign | Diff                   | chi-squared sign |
| Higher education                     | 337       | 19 | 14 23  | ns                                  | 311       | 15 | 11 19  | ns                                  | 192       | 16 | 11 22  | -2                     | ns               | 1                      | ns               |
| Lower education                      | 1037      | 15 | 13 18  |                                     | 534       | 17 | 13 20  |                                     | 172       | 13 | 8 18   | -3                     | ***              | -4                     | *                |
|                                      |           |    |        |                                     |           |    |        |                                     |           |    |        |                        |                  |                        |                  |
| Uncontrolled hypertension            |           |    |        |                                     |           |    |        |                                     |           |    |        |                        |                  |                        |                  |
| Educational level                    | 1998-2002 |    |        | Chi-squared test within period sign | 2008-2012 |    |        | Chi-squared test within period sign | 2018-2019 |    |        | 2018-2019 vs 1998-2002 |                  | 2018-2019 vs 2008-2012 |                  |
|                                      | n         | %  | 95% CI |                                     | n         | %  | 95% CI |                                     | n         | %  | 95% CI | Diff                   | chi-squared sign | Diff                   | chi-squared sign |
| Higher education                     | 337       | 23 | 19 28  | **                                  | 311       | 22 | 18 27  | ns                                  | 192       | 15 | 10 20  | -8                     | *                | -7                     | *                |
| Lower education                      | 1037      | 31 | 29 34  |                                     | 534       | 28 | 25 32  |                                     | 172       | 17 | 12 23  | -14                    | ***              | -11                    | ns               |
|                                      |           |    |        |                                     |           |    |        |                                     |           |    |        |                        |                  |                        |                  |
| Controlled hypertension              |           |    |        |                                     |           |    |        |                                     |           |    |        |                        |                  |                        |                  |
| Educational level                    | 1998-2002 |    |        | Chi-squared test within period sign | 2008-2012 |    |        | Chi-squared test within period sign | 2018-2019 |    |        | 2018-2019 vs 1998-2002 |                  | 2018-2019 vs 2008-2012 |                  |
|                                      | n         | %  | 95% CI |                                     | n         | %  | 95% CI |                                     | n         | %  | 95% CI | Diff                   | chi-squared sign | Diff                   | chi-squared sign |
| Higher education                     | 337       | 11 | 7 14   | ns                                  | 311       | 26 | 21 31  | ns                                  | 192       | 41 | 34 48  | 31                     | ***              | 15                     | **               |
| Lower education                      | 1037      | 10 | 8 12   |                                     | 534       | 31 | 27 34  |                                     | 172       | 40 | 33 48  | 30                     | ***              | 10                     | ns               |
|                                      |           |    |        |                                     |           |    |        |                                     |           |    |        |                        |                  |                        |                  |

Prevalence are age-standardized by ISTAT Italian population 2000, 2010 and 2019 respectively. CI: confidence interval. Diff: prevalence difference between 2018–2019 and 1998–2002 or 2018–2019 and 2008–2012; the values are approximated taking into account the first decimal of prevalence. Higher education - high school or college; lower education - primary or middle school. Chi-squared test to compare prevalences between periods and among age classes within the period. Raised blood pressure: systolic blood pressure  $\geq 140$  mmHg and/or diastolic blood pressure  $\geq 90$  mmHg. Hypertension: systolic blood pressure  $\geq 140$  mmHg and/or diastolic blood pressure  $\geq 90$ . Hypertension is divided into 'undiagnosed', 'diagnosed but untreated', 'uncontrolled' (treated and SBP  $\geq 140$  mmHg or DBP  $\geq 90$  mmHg) and 'controlled' (treated and SBP  $< 140$  mmHg and DBP  $< 90$  mmHg). Pool of the following Italian Regions: Piedmont, Lombardy, Liguria, Emilia Romagna, Tuscany, Lazio, Abruzzo, Basilicata, Calabria, and Sicily.

**Table S10. Age-standardized blood pressure mean values, and prevalence of raised blood pressure, hypertension and controlled hypertension based on measurements by sex and Italian Region. Italian resident men and women aged 35–74 years, the CUORE Project Survey 2018–2019.**

|                |     | 2018-2019                      |    |       |                                 |           |       |                       |        |           |              |        |           |                         |        |           |    |    |
|----------------|-----|--------------------------------|----|-------|---------------------------------|-----------|-------|-----------------------|--------|-----------|--------------|--------|-----------|-------------------------|--------|-----------|----|----|
|                |     | MEN                            |    |       |                                 |           |       |                       |        |           |              |        |           |                         |        |           |    |    |
| Italian Region | n   | Systolic blood pressure (mmHg) |    |       | Diastolic blood pressure (mmHg) |           |       | Raised blood pressure |        |           | Hypertension |        |           | Controlled hypertension |        |           |    |    |
|                |     | mean                           | SD | 95%CI | mean                            | SD        | 95%CI | %                     | 95% CI |           | %            | 95% CI |           | %                       | 95% CI |           |    |    |
| Abruzzo        | 102 | <b>134</b>                     | 14 | 132   | 137                             | <b>78</b> | 10    | 76                    | 80     | <b>36</b> | 27           | 45     | <b>47</b> | 37                      | 56     | <b>18</b> | 10 | 25 |
| Calabria       | 101 | <b>132</b>                     | 13 | 130   | 135                             | <b>76</b> | 9     | 75                    | 78     | <b>31</b> | 22           | 40     | <b>49</b> | 39                      | 59     | <b>31</b> | 22 | 40 |
| Liguria        | 104 | <b>127</b>                     | 12 | 125   | 130                             | <b>76</b> | 10    | 74                    | 78     | <b>20</b> | 12           | 27     | <b>40</b> | 30                      | 49     | <b>31</b> | 22 | 40 |
| Lazio          | 99  | <b>130</b>                     | 13 | 127   | 133                             | <b>79</b> | 10    | 77                    | 81     | <b>29</b> | 20           | 38     | <b>47</b> | 37                      | 57     | <b>31</b> | 22 | 40 |
| Lombardy       | 98  | <b>134</b>                     | 15 | 131   | 137                             | <b>78</b> | 9     | 76                    | 80     | <b>37</b> | 27           | 46     | <b>48</b> | 38                      | 58     | <b>19</b> | 11 | 26 |
| Piedmont       | 104 | <b>129</b>                     | 13 | 126   | 131                             | <b>75</b> | 9     | 73                    | 77     | <b>18</b> | 11           | 26     | <b>35</b> | 26                      | 45     | <b>43</b> | 34 | 53 |
| Emilia Romagna | 104 | <b>134</b>                     | 15 | 131   | 137                             | <b>79</b> | 10    | 77                    | 81     | <b>30</b> | 21           | 39     | <b>42</b> | 33                      | 51     | <b>20</b> | 12 | 27 |
| Basilicata     | 106 | <b>134</b>                     | 15 | 132   | 137                             | <b>80</b> | 10    | 78                    | 82     | <b>35</b> | 26           | 44     | <b>48</b> | 39                      | 58     | <b>27</b> | 19 | 36 |
| Tuscany        | 108 | <b>129</b>                     | 13 | 127   | 132                             | <b>77</b> | 9     | 75                    | 79     | <b>28</b> | 20           | 37     | <b>40</b> | 31                      | 50     | <b>25</b> | 17 | 33 |
| Sicily         | 105 | <b>132</b>                     | 13 | 129   | 134                             | <b>78</b> | 10    | 76                    | 80     | <b>33</b> | 24           | 42     | <b>44</b> | 35                      | 54     | <b>27</b> | 18 | 35 |
|                |     | WOMEN                          |    |       |                                 |           |       |                       |        |           |              |        |           |                         |        |           |    |    |
| Italian Region | n   | Systolic blood pressure (mmHg) |    |       | Diastolic blood pressure (mmHg) |           |       | Raised blood pressure |        |           | Hypertension |        |           | Controlled hypertension |        |           |    |    |
|                |     | mean                           | SD | 95%CI | mean                            | SD        | 95%CI | %                     | 95% CI |           | %            | 95% CI |           | %                       | 95% CI |           |    |    |
| Abruzzo        | 104 | <b>122</b>                     | 17 | 118   | 125                             | <b>73</b> | 10    | 71                    | 75     | <b>14</b> | 8            | 21     | <b>31</b> | 22                      | 40     | <b>45</b> | 35 | 54 |
| Calabria       | 109 | <b>121</b>                     | 14 | 119   | 124                             | <b>70</b> | 10    | 68                    | 72     | <b>16</b> | 9            | 23     | <b>40</b> | 31                      | 50     | <b>48</b> | 38 | 57 |
| Liguria        | 107 | <b>117</b>                     | 15 | 114   | 120                             | <b>72</b> | 11    | 70                    | 74     | <b>15</b> | 8            | 22     | <b>30</b> | 21                      | 38     | <b>32</b> | 23 | 40 |
| Lazio          | 114 | <b>124</b>                     | 14 | 122   | 127                             | <b>76</b> | 9     | 74                    | 78     | <b>16</b> | 9            | 22     | <b>35</b> | 26                      | 43     | <b>68</b> | 60 | 77 |
| Lombardy       | 100 | <b>127</b>                     | 18 | 124   | 131                             | <b>75</b> | 11    | 73                    | 77     | <b>24</b> | 16           | 33     | <b>37</b> | 27                      | 46     | <b>35</b> | 25 | 44 |
| Piedmont       | 113 | <b>117</b>                     | 13 | 115   | 119                             | <b>70</b> | 9     | 68                    | 71     | <b>8</b>  | 3            | 13     | <b>16</b> | 10                      | 23     | <b>43</b> | 34 | 53 |
| Emilia Romagna | 106 | <b>127</b>                     | 16 | 124   | 130                             | <b>76</b> | 11    | 74                    | 78     | <b>24</b> | 16           | 32     | <b>40</b> | 30                      | 49     | <b>32</b> | 23 | 41 |
| Basilicata     | 114 | <b>121</b>                     | 16 | 118   | 124                             | <b>72</b> | 10    | 70                    | 74     | <b>16</b> | 9            | 23     | <b>31</b> | 23                      | 39     | <b>22</b> | 15 | 30 |
| Tuscany        | 97  | <b>120</b>                     | 15 | 117   | 123                             | <b>72</b> | 9     | 70                    | 74     | <b>15</b> | 8            | 23     | <b>22</b> | 14                      | 31     | <b>22</b> | 14 | 30 |
| Sicily         | 102 | <b>124</b>                     | 14 | 121   | 127                             | <b>74</b> | 9     | 72                    | 76     | <b>17</b> | 10           | 24     | <b>37</b> | 27                      | 46     | <b>63</b> | 54 | 73 |

SD: standard deviations. Means, standard deviations and prevalences were age-standardized by Italian National Institute of Statistics-ISTAT Italian population 2019. Raised blood pressure: systolic blood pressure  $\geq 140$  mmHg and/or diastolic blood pressure  $\geq 90$  mmHg. Hypertension: systolic blood pressure  $\geq 140$  mmHg and/or diastolic blood pressure  $\geq 90$  mmHg and/or under specific pharmacological treatment. Controlled hypertension: treated and SBP  $< 140$  mmHg and DBP  $< 90$  mmHg. Regional data for 1998–2002 and 2008–2012 CUORE Project surveys were available at <http://www.cuore.iss.it/eng/survey/cuoredata>.

**Table S11. Blood pressure and heart rate measurements and prevalence of blood pressure treatment, raised blood pressure, hypertension and state of hypertension control, (age-adjusted using the European standard population) by sex and period. Italian resident men and women aged 35–74 years, the CUORE Project Surveys 1998-2002, 2008-2012 and 2018-2019.**

|  |                                       | MEN       |        |         |           |        |         |           |        |         |                        |                     |                        |                     |
|--|---------------------------------------|-----------|--------|---------|-----------|--------|---------|-----------|--------|---------|------------------------|---------------------|------------------------|---------------------|
|  |                                       | 1998-2002 |        |         | 2008-2012 |        |         | 2018-2019 |        |         | 2018-2019 vs 1998-2002 |                     | 2018-2019 vs 2008-2012 |                     |
|  |                                       | n=2985    |        |         | n=2218    |        |         | n=1031    |        |         | Diff                   | t-test p-value      | Diff                   | t-test p-value      |
|  |                                       | mean      | SD     | 95% CI  | mean      | SD     | 95% CI  | mean      | SD     | 95% CI  |                        |                     |                        |                     |
|  | Systolic blood pressure - SBP (mmHg)  | 136       | 18     | 136 137 | 132       | 16     | 132 133 | 132       | 14     | 131 132 | -5                     | ***                 | -1                     | ns                  |
|  | Diastolic blood pressure - DBP (mmHg) | 86        | 11     | 86 87   | 84        | 10     | 83 84   | 77        | 10     | 77 78   | -9                     | ***                 | -6                     | ***                 |
|  | SBP not under drug treatment (mmHg)   | 134       | 17     | 133 135 | 131       | 16     | 130 131 | 131       | 14     | 130 132 | -3                     | ***                 | 0.3                    | ns                  |
|  | DBP not under drug treatment (mmHg)   | 85        | 10     | 85 86   | 83        | 10     | 83 84   | 77        | 10     | 76 77   | -9                     | ***                 | -6                     | ***                 |
|  | Heart rate (beats per minute)         | 66        | 11     | 66 66   | 69        | 10     | 68 69   | 72        | 12     | 71 72   | 6                      | ***                 | 3                      | ***                 |
|  |                                       | %         | 95% CI |         | %         | 95% CI |         | %         | 95% CI |         | Diff                   | chi-squared p-value | Diff                   | chi-squared p-value |
|  | Blood pressure drug treatment         | 20        | 18     | 21      | 26        | 24     | 27      | 25        | 23     | 28      | 6                      | **                  | -0.4                   | ns                  |
|  | Raised blood bressure                 | 51        | 49     | 53      | 41        | 39     | 43      | 30        | 27     | 32      | -21                    | ***                 | -11                    | ***                 |
|  | Hypertension                          | 55        | 53     | 57      | 51        | 49     | 53      | 44        | 41     | 47      | -11                    | ***                 | -7                     | **                  |
|  | Hypertension                          |           |        |         |           |        |         |           |        |         |                        |                     |                        |                     |
|  | Undiagnosed                           | 53        | 50     | 55      | 39        | 36     | 41      | 37        | 32     | 41      | -16                    | ***                 | -2                     | ns                  |
|  | Diagnosed but untreated               | 15        | 14     | 17      | 18        | 16     | 20      | 14        | 11     | 17      | -1                     | ns                  | -3                     | ns                  |
|  | Uncontrolled                          | 26        | 23     | 28      | 26        | 23     | 28      | 22        | 18     | 26      | -4                     | ns                  | -4                     | ns                  |
|  | Controlled                            | 7         | 5      | 8       | 18        | 16     | 20      | 27        | 23     | 31      | 20                     | ***                 | 9                      | ***                 |
|  |                                       | WOMEN     |        |         |           |        |         |           |        |         |                        |                     |                        |                     |
|  |                                       | 1998-2002 |        |         | 2008-2012 |        |         | 2018-2019 |        |         | 2018-2019 vs 1998-2002 |                     | 2018-2019 vs 2008-2012 |                     |
|  |                                       | n=2951    |        |         | n=2185    |        |         | n=1066    |        |         | Diff                   | t-test p-value      | Diff                   | t-test p-value      |
|  |                                       | mean      | SD     | 95% CI  | mean      | SD     | 95% CI  | mean      | SD     | 95% CI  |                        |                     |                        |                     |
|  | Systolic blood pressure - SBP (mmHg)  | 132       | 18     | 131 132 | 127       | 17     | 126 127 | 122       | 16     | 121 123 | -10                    | ***                 | -5                     | ***                 |
|  | Diastolic blood pressure - DBP (mmHg) | 82        | 10     | 82 83   | 79        | 9      | 78 79   | 73        | 11     | 72 73   | -9                     | ***                 | -6                     | ***                 |
|  | SBP not under drug treatment (mmHg)   | 129       | 16     | 128 129 | 124       | 15     | 123 125 | 120       | 15     | 119 121 | -9                     | ***                 | -4                     | ***                 |
|  | DBP not under drug treatment (mmHg)   | 81        | 10     | 80 81   | 78        | 9      | 77 78   | 72        | 10     | 71 72   | -9                     | ***                 | -6                     | ***                 |
|  | Heart rate (beats per minute)         | 70        | 11     | 69 70   | 71        | 9      | 71 71   | 73        | 11     | 72 73   | 3                      | ***                 | 2                      | ***                 |
|  |                                       | %         | 95% CI |         | %         | 95% CI |         | %         | 95% CI |         | Diff                   | chi-squared p-value | Diff                   | chi-squared p-value |
|  | Blood pressure drug treatment         | 22        | 20     | 23      | 23        | 21     | 25      | 22        | 19     | 24      | 0.3                    | ns                  | -1                     | ns                  |
|  | Raised blood bressure                 | 40        | 38     | 41      | 26        | 24     | 28      | 16        | 14     | 18      | -23                    | ***                 | -10                    | ***                 |
|  | Hypertension                          | 45        | 43     | 46      | 36        | 34     | 38      | 31        | 28     | 34      | -14                    | ***                 | -5                     | **                  |
|  | Hypertension                          |           |        |         |           |        |         |           |        |         |                        |                     |                        |                     |
|  | Undiagnosed                           | 44        | 42     | 47      | 31        | 28     | 34      | 28        | 24     | 33      | -16                    | ***                 | -3                     | ns                  |
|  | Diagnosed but untreated               | 16        | 14     | 18      | 15        | 13     | 18      | 16        | 12     | 20      | 0.3                    | ns                  | 1                      | ns                  |
|  | Uncontrolled                          | 30        | 27     | 32      | 26        | 24     | 29      | 16        | 12     | 19      | -14                    | ***                 | -11                    | ***                 |
|  | Controlled                            | 10        | 9      | 12      | 27        | 24     | 30      | 40        | 35     | 45      | 30                     | ***                 | 13                     | ***                 |

Means, standard deviation and prevalence are age-standardized by European standard population 2013. SD: standard deviation. CI: confidence interval. Diff: mean or percentage difference between 2018–2019 and 1998–2002 or 2018–2019 and 2008–2012; the values are approximated taking into account the first decimal of means or prevalence. t-test to compare mean values between periods. Chi-squared test to compare prevalences between periods. Raised blood pressure: systolic blood pressure  $\geq 140$  mmHg and/or diastolic blood pressure  $\geq 90$  mmHg. Hypertension: systolic blood pressure  $\geq 140$  mmHg and/or diastolic blood pressure  $\geq 90$  mmHg and/or under specific pharmacological treatment. Hypertension is divided into ‘undiagnosed’, ‘diagnosed but untreated’, ‘uncontrolled’ (treated and SBP  $\geq 140$  mmHg or DBP  $\geq 90$  mmHg) and ‘controlled’ (treated and SBP  $< 140$  mmHg and DBP  $< 90$  mmHg). Pool of the following Italian Regions: Piedmont, Lombardy, Liguria, Emilia Romagna, Tuscany, Lazio, Abruzzo, Basilicata, Calabria, and Sicily.

**Table S12. Blood pressure measurements and heart rate mean levels by educational level and period (age-adjusted using the European standard population). Italian resident men aged 35–74 years, the CUORE Project Surveys 1998–2002, 2008–2012, and 2018–2019.**

| MEN                                                      |           |      |    |         |                              |           |      |    |         |                              |           |      |    |         |                        |             |                        |             |
|----------------------------------------------------------|-----------|------|----|---------|------------------------------|-----------|------|----|---------|------------------------------|-----------|------|----|---------|------------------------|-------------|------------------------|-------------|
| Systolic blood pressure (mmHg)                           |           |      |    |         |                              |           |      |    |         |                              |           |      |    |         |                        |             |                        |             |
| Educational level                                        | 1998-2002 |      |    |         | ANOVA within period sign *** | 2008-2012 |      |    |         | ANOVA within period sign *** | 2018-2019 |      |    |         | 2018-2019 vs 1998-2002 |             | 2018-2019 vs 2008-2012 |             |
|                                                          | n         | mean | SD | 95% CI  |                              | n         | mean | SD | 95% CI  |                              | n         | mean | SD | 95% CI  | Diff                   | t-test sign | Diff                   | t-test sign |
| Higher education                                         | 1249      | 135  | 17 | 135 136 |                              | 1183      | 131  | 15 | 130 131 |                              | 725       | 131  | 14 | 130 132 | -5                     | ***         | 0.1                    | ns          |
| Lower education                                          | 1730      | 137  | 18 | 136 138 |                              | 1018      | 134  | 17 | 133 135 |                              | 303       | 134  | 16 | 132 135 | -3                     | **          | -0.3                   | ns          |
| Diastolic blood pressure (mmHg)                          |           |      |    |         |                              |           |      |    |         |                              |           |      |    |         |                        |             |                        |             |
| Educational level                                        | 1998-2002 |      |    |         | ANOVA within period sign ns  | 2008-2012 |      |    |         | ANOVA within period sign ns  | 2018-2019 |      |    |         | 2018-2019 vs 1998-2002 |             | 2018-2019 vs 2008-2012 |             |
|                                                          | n         | mean | SD | 95% CI  |                              | n         | mean | SD | 95% CI  |                              | n         | mean | SD | 95% CI  | Diff                   | t-test sign | Diff                   | t-test sign |
| Higher education                                         | 1249      | 87   | 11 | 86 87   |                              | 1183      | 83   | 10 | 83 84   |                              | 725       | 77   | 10 | 77 78   | -9                     | ***         | -6                     | ***         |
| Lower education                                          | 1730      | 86   | 11 | 86 87   |                              | 1018      | 84   | 10 | 83 84   |                              | 303       | 78   | 10 | 77 79   | -8                     | ***         | -6                     | ***         |
| Systolic blood pressure not under drug treatment (mmHg)  |           |      |    |         |                              |           |      |    |         |                              |           |      |    |         |                        |             |                        |             |
| Educational level                                        | 1998-2002 |      |    |         | ANOVA within period sign *** | 2008-2012 |      |    |         | ANOVA within period sign *** | 2018-2019 |      |    |         | 2018-2019 vs 1998-2002 |             | 2018-2019 vs 2008-2012 |             |
|                                                          | n         | mean | SD | 95% CI  |                              | n         | mean | SD | 95% CI  |                              | n         | mean | SD | 95% CI  | Diff                   | t-test sign | Diff                   | t-test sign |
| Higher education                                         | 1046      | 134  | 16 | 133 135 |                              | 913       | 129  | 15 | 128 130 |                              | 537       | 130  | 13 | 129 131 | -4                     | ***         | 1                      | ns          |
| Lower education                                          | 1305      | 134  | 17 | 133 135 |                              | 680       | 132  | 16 | 131 133 |                              | 205       | 133  | 15 | 131 135 | -1                     | ns          | 1                      | ns          |
| Diastolic blood pressure not under drug treatment (mmHg) |           |      |    |         |                              |           |      |    |         |                              |           |      |    |         |                        |             |                        |             |
| Educational level                                        | 1998-2002 |      |    |         | ANOVA within period sign ns  | 2008-2012 |      |    |         | ANOVA within period sign ns  | 2018-2019 |      |    |         | 2018-2019 vs 1998-2002 |             | 2018-2019 vs 2008-2012 |             |
|                                                          | n         | mean | SD | 95% CI  |                              | n         | mean | SD | 95% CI  |                              | n         | mean | SD | 95% CI  | Diff                   | t-test sign | Diff                   | t-test sign |
| Higher education                                         | 1046      | 86   | 10 | 85 86   |                              | 913       | 83   | 10 | 82 83   |                              | 537       | 77   | 10 | 76 78   | -9                     | ***         | -6                     | ***         |
| Lower education                                          | 1305      | 85   | 10 | 85 86   |                              | 680       | 83   | 10 | 83 84   |                              | 205       | 77   | 9  | 76 78   | -8                     | ***         | -6                     | ***         |
| Heart rate (beats per minute)                            |           |      |    |         |                              |           |      |    |         |                              |           |      |    |         |                        |             |                        |             |
| Educational level                                        | 1998-2002 |      |    |         | ANOVA within period sign ns  | 2008-2012 |      |    |         | ANOVA within period sign ns  | 2018-2019 |      |    |         | 2018-2019 vs 1998-2002 |             | 2018-2019 vs 2008-2012 |             |
|                                                          | n         | mean | SD | 95% CI  |                              | n         | mean | SD | 95% CI  |                              | n         | mean | SD | 95% CI  | Diff                   | t-test sign | Diff                   | t-test sign |
| Higher education                                         | 1244      | 66   | 11 | 65 67   |                              | 1183      | 66   | 11 | 65 67   |                              | 725       | 71   | 11 | 70 71   | 5                      | ***         | 5                      | ***         |
| Lower education                                          | 1730      | 66   | 11 | 65 67   |                              | 1018      | 66   | 12 | 66 67   |                              | 303       | 74   | 12 | 73 76   | 8                      | ***         | 8                      | ***         |

Means and standard deviations age-standardized by European standard population 2013. SD: standard deviation; CI: confidence interval. Diff: mean difference between 2018–2019 and 1998–2002 or 2018–2019 and 2008–2012; the values are approximated taking into account the first decimal of means. Higher education - high school or college; lower education - primary or middle school. ANOVA: Analysis of Variance to compare variables among age classes within periods. t-test to compare variables between periods. \*\*\* p-value<0.0001; \*\* p-value<0.01; \*p-value<0.05; ns not significant p-value. Pool of the following Italian Regions: Piedmont, Lombardy, Liguria, Emilia Romagna, Tuscany, Lazio, Abruzzo, Basilicata, Calabria, and Sicily.



**Table S13. Blood pressure measurements and heart rate mean levels by educational level and period (age-adjusted using the European standard population). Italian resident women aged 35–74 years, the CUORE Project Surveys 1998–2002, 2008–2012, and 2018–2019.**

| WOMEN                                                    |           |      |    |         |                          |           |      |    |         |                          |           |      |    |         |                        |             |                        |             |
|----------------------------------------------------------|-----------|------|----|---------|--------------------------|-----------|------|----|---------|--------------------------|-----------|------|----|---------|------------------------|-------------|------------------------|-------------|
| Systolic blood pressure (mmHg)                           |           |      |    |         |                          |           |      |    |         |                          |           |      |    |         |                        |             |                        |             |
| Educational level                                        | 1998-2002 |      |    |         | ANOVA within period sign | 2008-2012 |      |    |         | ANOVA within period sign | 2018-2019 |      |    |         | 2018-2019 vs 1998-2002 |             | 2018-2019 vs 2008-2012 |             |
|                                                          | n         | mean | SD | 95% CI  |                          | n         | mean | SD | 95% CI  |                          | n         | mean | SD | 95% CI  | Diff                   | t-test sign | Diff                   | t-test sign |
| Higher education                                         | 1052      | 130  | 16 | 129 131 | ***                      | 1167      | 124  | 15 | 123 125 | ***                      | 725       | 120  | 15 | 119 121 | -10                    | ***         | -4                     | ***         |
| Lower education                                          | 1887      | 133  | 18 | 132 134 |                          | 1017      | 130  | 18 | 129 131 |                          | 339       | 125  | 17 | 123 127 | -8                     | ***         | -4                     | ***         |
| Diastolic blood pressure (mmHg)                          |           |      |    |         |                          |           |      |    |         |                          |           |      |    |         |                        |             |                        |             |
| Educational level                                        | 1998-2002 |      |    |         | ANOVA within period sign | 2008-2012 |      |    |         | ANOVA within period sign | 2018-2019 |      |    |         | 2018-2019 vs 1998-2002 |             | 2018-2019 vs 2008-2012 |             |
|                                                          | n         | mean | SD | 95% CI  |                          | n         | mean | SD | 95% CI  |                          | n         | mean | SD | 95% CI  | Diff                   | t-test sign | Diff                   | t-test sign |
| Higher education                                         | 1052      | 81   | 10 | 81 82   | ***                      | 1167      | 78   | 9  | 77 78   | ***                      | 725       | 72   | 11 | 72 73   | -9                     | ***         | -6                     | ***         |
| Lower education                                          | 1887      | 83   | 10 | 82 83   |                          | 1017      | 79   | 10 | 79 80   |                          | 339       | 74   | 10 | 73 75   | -9                     | ***         | -5                     | ***         |
| Systolic blood pressure not under drug treatment (mmHg)  |           |      |    |         |                          |           |      |    |         |                          |           |      |    |         |                        |             |                        |             |
| Educational level                                        | 1998-2002 |      |    |         | ANOVA within period sign | 2008-2012 |      |    |         | ANOVA within period sign | 2018-2019 |      |    |         | 2018-2019 vs 1998-2002 |             | 2018-2019 vs 2008-2012 |             |
|                                                          | n         | mean | SD | 95% CI  |                          | n         | mean | SD | 95% CI  |                          | n         | mean | SD | 95% CI  | Diff                   | t-test sign | Diff                   | t-test sign |
| Higher education                                         | 928       | 128  | 16 | 127 129 | ***                      | 992       | 122  | 14 | 121 122 | ***                      | 593       | 119  | 15 | 117 120 | -9                     | ***         | -3                     | ***         |
| Lower education                                          | 1331      | 129  | 16 | 129 130 |                          | 651       | 127  | 16 | 126 128 |                          | 203       | 123  | 16 | 121 125 | -6                     | ***         | -4                     | **          |
| Diastolic blood pressure not under drug treatment (mmHg) |           |      |    |         |                          |           |      |    |         |                          |           |      |    |         |                        |             |                        |             |
| Educational level                                        | 1998-2002 |      |    |         | ANOVA within period sign | 2008-2012 |      |    |         | ANOVA within period sign | 2018-2019 |      |    |         | 2018-2019 vs 1998-2002 |             | 2018-2019 vs 2008-2012 |             |
|                                                          | n         | mean | SD | 95% CI  |                          | n         | mean | SD | 95% CI  |                          | n         | mean | SD | 95% CI  | Diff                   | t-test sign | Diff                   | t-test sign |
| Higher education                                         | 928       | 81   | 10 | 80 81   | ***                      | 992       | 77   | 9  | 77 78   | ***                      | 593       | 71   | 10 | 70 72   | -9                     | ***         | -6                     | ***         |
| Lower education                                          | 1331      | 81   | 10 | 81 82   |                          | 651       | 78   | 9  | 78 79   |                          | 203       | 73   | 10 | 72 75   | -8                     | ***         | -5                     | ***         |
| Heart rate (beats per minute)                            |           |      |    |         |                          |           |      |    |         |                          |           |      |    |         |                        |             |                        |             |
| Educational level                                        | 1998-2002 |      |    |         | ANOVA within period sign | 2008-2012 |      |    |         | ANOVA within period sign | 2018-2019 |      |    |         | 2018-2019 vs 1998-2002 |             | 2018-2019 vs 2008-2012 |             |
|                                                          | n         | mean | SD | 95% CI  |                          | n         | mean | SD | 95% CI  |                          | n         | mean | SD | 95% CI  | Diff                   | t-test sign | Diff                   | t-test sign |
| Higher education                                         | 1047      | 69   | 11 | 69 70   | ns                       | 1167      | 71   | 9  | 70 71   | ns                       | 725       | 73   | 10 | 72 73   | 3                      | ***         | 2                      | **          |
| Lower education                                          | 1884      | 70   | 11 | 69 70   |                          | 1017      | 71   | 9  | 71 72   |                          | 339       | 73   | 11 | 72 75   | 4                      | ***         | 2                      | **          |

Means and standard deviations age-standardized by European standard population 2013. SD: standard deviation; CI: confidence interval. Diff: mean difference between 2018–2019 and 1998–2002 or 2018–2019 and 2008–2012; the values are approximated taking into account the first decimal of means. Higher education - high school or college; lower education - primary or middle school. ANOVA: Analysis of Variance to compare variables among age classes within periods. t-test to compare variables between periods. \*\*\* p-value<0.0001; \*\* p-value<0.01; \*p-value<0.05; ns not significant p-value. Pool of the following Italian Regions: Piedmont, Lombardy, Liguria, Emilia Romagna, Tuscany, Lazio, Abruzzo, Basilicata, Calabria, and Sicily.

**Table S14. Prevalence of blood pressure treatment, raised blood pressure, hypertension and state of hypertension control based on measurements, by educational class and period (age-adjusted using the European standard population). Italian resident men aged 35–74 years, the CUORE Project Surveys 1998–2002, 2008–2012 and 2018–2019.**

| MEN                                  |           |    |        |                                                  |           |    |        |                                                  |           |    |        |                                                  |                        |                  |                        |                  |
|--------------------------------------|-----------|----|--------|--------------------------------------------------|-----------|----|--------|--------------------------------------------------|-----------|----|--------|--------------------------------------------------|------------------------|------------------|------------------------|------------------|
| Blood pressure drug treatment        |           |    |        |                                                  |           |    |        |                                                  |           |    |        |                                                  |                        |                  |                        |                  |
| Educational level                    | 1998–2002 |    |        | Chi-squared test within period sign<br><i>ns</i> | 2008–2012 |    |        | Chi-squared test within period sign<br><i>ns</i> | 2018–2019 |    |        | Chi-squared test within period sign<br><i>ns</i> | 2018–2019 vs 1998–2002 |                  | 2018–2019 vs 2008–2012 |                  |
|                                      | n         | %  | 95% CI |                                                  | n         | %  | 95% CI |                                                  | n         | %  | 95% CI |                                                  | Diff                   | chi-squared sign | Diff                   | chi-squared sign |
| Higher education                     | 1249      | 19 | 16 21  |                                                  | 1183      | 26 | 23 28  |                                                  | 725       | 26 | 23 29  |                                                  | 7                      | **               | 0.2                    | <i>ns</i>        |
| Lower education                      | 1730      | 20 | 18 22  |                                                  | 1018      | 26 | 24 29  |                                                  | 303       | 24 | 19 29  |                                                  | 4                      | <i>ns</i>        | -2                     | <i>ns</i>        |
| Raised blood pressure                |           |    |        |                                                  |           |    |        |                                                  |           |    |        |                                                  |                        |                  |                        |                  |
| Educational level                    | 1998–2002 |    |        | Chi-squared test within period sign<br><i>ns</i> | 2008–2012 |    |        | Chi-squared test within period sign<br><b>**</b> | 2018–2019 |    |        | Chi-squared test within period sign<br><i>ns</i> | 2018–2019 vs 1998–2002 |                  | 2018–2019 vs 2008–2012 |                  |
|                                      | n         | %  | 95% CI |                                                  | n         | %  | 95% CI |                                                  | n         | %  | 95% CI |                                                  | Diff                   | chi-squared sign | Diff                   | chi-squared sign |
| Higher education                     | 1249      | 49 | 46 52  |                                                  | 1183      | 36 | 33 39  |                                                  | 725       | 28 | 25 31  |                                                  | -21                    | ***              | -8                     | **               |
| Lower education                      | 1730      | 52 | 50 55  |                                                  | 1018      | 44 | 41 47  |                                                  | 303       | 34 | 29 39  |                                                  | -18                    | ***              | -10                    | **               |
| Hypertension                         |           |    |        |                                                  |           |    |        |                                                  |           |    |        |                                                  |                        |                  |                        |                  |
| Educational level                    | 1998–2002 |    |        | Chi-squared test within period sign<br><b>*</b>  | 2008–2012 |    |        | Chi-squared test within period sign<br><i>ns</i> | 2018–2019 |    |        | Chi-squared test within period sign<br><i>ns</i> | 2018–2019 vs 1998–2002 |                  | 2018–2019 vs 2008–2012 |                  |
|                                      | n         | %  | 95% CI |                                                  | n         | %  | 95% CI |                                                  | n         | %  | 95% CI |                                                  | Diff                   | chi-squared sign | Diff                   | chi-squared sign |
| Higher education                     | 1249      | 53 | 50 55  |                                                  | 1183      | 49 | 46 52  |                                                  | 725       | 43 | 40 47  |                                                  | -9                     | ***              | -6                     | *                |
| Lower education                      | 1730      | 56 | 54 59  |                                                  | 1018      | 53 | 50 56  |                                                  | 303       | 46 | 40 52  |                                                  | -10                    | **               | -7                     | *                |
| Undiagnosed hypertension             |           |    |        |                                                  |           |    |        |                                                  |           |    |        |                                                  |                        |                  |                        |                  |
| Educational level                    | 1998–2002 |    |        | Chi-squared test within period sign<br><i>ns</i> | 2008–2012 |    |        | Chi-squared test within period sign<br><i>ns</i> | 2018–2019 |    |        | Chi-squared test within period sign<br><i>ns</i> | 2018–2019 vs 1998–2002 |                  | 2018–2019 vs 2008–2012 |                  |
|                                      | n         | %  | 95% CI |                                                  | n         | %  | 95% CI |                                                  | n         | %  | 95% CI |                                                  | Diff                   | chi-squared sign | Diff                   | chi-squared sign |
| Higher education                     | 621       | 53 | 49 57  |                                                  | 555       | 36 | 32 40  |                                                  | 314       | 36 | 31 41  |                                                  | -17                    | ***              | -0.2                   | <i>ns</i>        |
| Lower education                      | 1063      | 53 | 50 56  |                                                  | 610       | 39 | 35 43  |                                                  | 168       | 38 | 31 46  |                                                  | -15                    | **               | -1                     | <i>ns</i>        |
| Diagnosed but untreated hypertension |           |    |        |                                                  |           |    |        |                                                  |           |    |        |                                                  |                        |                  |                        |                  |
| Educational level                    | 1998–2002 |    |        | Chi-squared test within period sign<br><i>ns</i> | 2008–2012 |    |        | Chi-squared test within period sign<br><i>ns</i> | 2018–2019 |    |        | Chi-squared test within period sign<br><i>ns</i> | 2018–2019 vs 1998–2002 |                  | 2018–2019 vs 2008–2012 |                  |
|                                      | n         | %  | 95% CI |                                                  | n         | %  | 95% CI |                                                  | n         | %  | 95% CI |                                                  | Diff                   | chi-squared sign | Diff                   | chi-squared sign |
| Higher education                     | 621       | 16 | 13 19  |                                                  | 555       | 19 | 16 22  |                                                  | 314       | 13 | 10 17  |                                                  | -2                     | <i>ns</i>        | -6                     | *                |
| Lower education                      | 1063      | 15 | 12 17  |                                                  | 610       | 16 | 13 18  |                                                  | 168       | 15 | 10 21  |                                                  | 1                      | ***              | -0.1                   | <i>ns</i>        |
| Uncontrolled hypertension            |           |    |        |                                                  |           |    |        |                                                  |           |    |        |                                                  |                        |                  |                        |                  |
| Educational level                    | 1998–2002 |    |        | Chi-squared test within period sign<br><i>ns</i> | 2008–2012 |    |        | Chi-squared test within period sign<br><b>**</b> | 2018–2019 |    |        | Chi-squared test within period sign<br><i>ns</i> | 2018–2019 vs 1998–2002 |                  | 2018–2019 vs 2008–2012 |                  |
|                                      | n         | %  | 95% CI |                                                  | n         | %  | 95% CI |                                                  | n         | %  | 95% CI |                                                  | Diff                   | chi-squared sign | Diff                   | chi-squared sign |
| Higher education                     | 621       | 25 | 22 29  |                                                  | 555       | 22 | 19 26  |                                                  | 314       | 21 | 17 26  |                                                  | -4                     | <i>ns</i>        | -1                     | <i>ns</i>        |
| Lower education                      | 1063      | 26 | 23 28  |                                                  | 610       | 30 | 26 33  |                                                  | 168       | 26 | 19 33  |                                                  | 0.5                    | ***              | -4                     | <i>ns</i>        |
| Controlled hypertension              |           |    |        |                                                  |           |    |        |                                                  |           |    |        |                                                  |                        |                  |                        |                  |
| Educational level                    | 1998–2002 |    |        | Chi-squared test within period sign<br><i>ns</i> | 2008–2012 |    |        | Chi-squared test within period sign<br><b>**</b> | 2018–2019 |    |        | Chi-squared test within period sign<br><b>*</b>  | 2018–2019 vs 1998–2002 |                  | 2018–2019 vs 2008–2012 |                  |
|                                      | n         | %  | 95% CI |                                                  | n         | %  | 95% CI |                                                  | n         | %  | 95% CI |                                                  | Diff                   | chi-squared sign | Diff                   | chi-squared sign |
| Higher education                     | 621       | 6  | 4 8    |                                                  | 555       | 22 | 19 26  |                                                  | 314       | 30 | 24 35  |                                                  | 23                     | ***              | 7                      | *                |
| Lower education                      | 1063      | 7  | 5 8    |                                                  | 610       | 15 | 12 18  |                                                  | 168       | 20 | 14 26  |                                                  | 13                     | **               | 5                      | <i>ns</i>        |

Prevalence are age-standardized by age-standardized by European standard population 2013. CI: confidence interval. Diff: prevalence difference between 2018–2019 and 1998–2002 or 2018–2019 and 2008–2012; the values are approximated taking into account the first decimal of prevalence. Higher education - high school or college; lower education - primary or middle school. Chi-squared test to compare prevalences between periods and among age classes within the period. Raised blood pressure: systolic blood pressure  $\geq 140$  mmHg and/or diastolic blood pressure  $\geq 90$  mmHg. Hypertension: systolic blood pressure  $\geq 140$  mmHg and/or diastolic blood pressure  $\geq 90$  and/or under specific pharmacological treatment. Hypertension is divided into 'undiagnosed', 'diagnosed but untreated', 'uncontrolled' (treated and SBP  $\geq 140$  mmHg or DBP  $\geq 90$  mmHg) and 'controlled' (treated and SBP  $< 140$  mmHg and DBP  $< 90$  mmHg). Pool of the following Italian Regions: Piedmont, Lombardy, Liguria, Emilia Romagna, Tuscany, Lazio, Abruzzo, Basilicata, Calabria, and Sicily.



**Table S15. Prevalence of blood pressure treatment, raised blood pressure, hypertension and state of hypertension control based on measurements, by educational class and period (age-adjusted using the European standard population). Italian resident women aged 35–74 years, the CUORE Project Surveys 1998–2002, 2008–2012 and 2018–2019.**

| WOMEN                                |           |    |        |                                         |           |    |        |                                         |           |    |        |                                        |                        |                  |                        |                  |
|--------------------------------------|-----------|----|--------|-----------------------------------------|-----------|----|--------|-----------------------------------------|-----------|----|--------|----------------------------------------|------------------------|------------------|------------------------|------------------|
| Blood pressure drug treatment        |           |    |        |                                         |           |    |        |                                         |           |    |        |                                        |                        |                  |                        |                  |
| Educational level                    | 1998-2002 |    |        | Chi-squared test within period sign *** | 2008-2012 |    |        | Chi-squared test within period sign *** | 2018-2019 |    |        | Chi-squared test within period sign ** | 2018-2019 vs 1998-2002 |                  | 2018-2019 vs 2008-2012 |                  |
|                                      | n         | %  | 95% CI |                                         | n         | %  | 95% CI |                                         | n         | %  | 95% CI |                                        | Diff                   | chi-squared sign | Diff                   | chi-squared sign |
| Higher education                     | 1052      | 16 | 14 19  |                                         | 1167      | 19 | 17 21  |                                         | 725       | 19 | 16 22  |                                        | 2                      | ns               | -0.4                   | ns               |
| Lower education                      | 1887      | 24 | 22 25  |                                         | 1017      | 26 | 24 29  |                                         | 339       | 27 | 22 31  |                                        | 3                      | ns               | 0.4                    | ns               |
| Raised blood pressure                |           |    |        |                                         |           |    |        |                                         |           |    |        |                                        |                        |                  |                        |                  |
| Educational level                    | 1998-2002 |    |        | Chi-squared test within period sign **  | 2008-2012 |    |        | Chi-squared test within period sign *** | 2018-2019 |    |        | Chi-squared test within period sign ** | 2018-2019 vs 1998-2002 |                  | 2018-2019 vs 2008-2012 |                  |
|                                      | n         | %  | 95% CI |                                         | n         | %  | 95% CI |                                         | n         | %  | 95% CI |                                        | Diff                   | chi-squared sign | Diff                   | chi-squared sign |
| Higher education                     | 1052      | 35 | 32 38  |                                         | 1167      | 22 | 20 24  |                                         | 725       | 14 | 11 16  |                                        | -21                    | ***              | -8                     | ***              |
| Lower education                      | 1887      | 42 | 40 44  |                                         | 1017      | 30 | 27 32  |                                         | 339       | 21 | 16 25  |                                        | -21                    | ***              | -9                     | **               |
| Hypertension                         |           |    |        |                                         |           |    |        |                                         |           |    |        |                                        |                        |                  |                        |                  |
| Educational level                    | 1998-2002 |    |        | Chi-squared test within period sign **  | 2008-2012 |    |        | Chi-squared test within period sign *** | 2018-2019 |    |        | Chi-squared test within period sign ** | 2018-2019 vs 1998-2002 |                  | 2018-2019 vs 2008-2012 |                  |
|                                      | n         | %  | 95% CI |                                         | n         | %  | 95% CI |                                         | n         | %  | 95% CI |                                        | Diff                   | chi-squared sign | Diff                   | chi-squared sign |
| Higher education                     | 1052      | 40 | 37 43  |                                         | 1167      | 32 | 29 34  |                                         | 725       | 27 | 24 30  |                                        | -13                    | ***              | -5                     | *                |
| Lower education                      | 1887      | 47 | 45 49  |                                         | 1017      | 41 | 38 44  |                                         | 339       | 38 | 33 43  |                                        | -9                     | **               | -3                     | ns               |
| Undiagnosed hypertension             |           |    |        |                                         |           |    |        |                                         |           |    |        |                                        |                        |                  |                        |                  |
| Educational level                    | 1998-2002 |    |        | Chi-squared test within period sign ns  | 2008-2012 |    |        | Chi-squared test within period sign **  | 2018-2019 |    |        | Chi-squared test within period sign ns | 2018-2019 vs 1998-2002 |                  | 2018-2019 vs 2008-2012 |                  |
|                                      | n         | %  | 95% CI |                                         | n         | %  | 95% CI |                                         | n         | %  | 95% CI |                                        | Diff                   | chi-squared sign | Diff                   | chi-squared sign |
| Higher education                     | 337       | 47 | 42 52  |                                         | 311       | 36 | 30 41  |                                         | 192       | 28 | 21 34  |                                        | -19                    | ***              | -8                     | ns               |
| Lower education                      | 1037      | 43 | 40 46  |                                         | 534       | 25 | 21 28  |                                         | 172       | 31 | 24 38  |                                        | -12                    | **               | 6                      | ns               |
| Diagnosed but untreated hypertension |           |    |        |                                         |           |    |        |                                         |           |    |        |                                        |                        |                  |                        |                  |
| Educational level                    | 1998-2002 |    |        | Chi-squared test within period sign ns  | 2008-2012 |    |        | Chi-squared test within period sign ns  | 2018-2019 |    |        | Chi-squared test within period sign ns | 2018-2019 vs 1998-2002 |                  | 2018-2019 vs 2008-2012 |                  |
|                                      | n         | %  | 95% CI |                                         | n         | %  | 95% CI |                                         | n         | %  | 95% CI |                                        | Diff                   | chi-squared sign | Diff                   | chi-squared sign |
| Higher education                     | 337       | 19 | 14 23  |                                         | 311       | 15 | 11 19  |                                         | 192       | 17 | 12 23  |                                        | -1                     | ns               | 2                      | ns               |
| Lower education                      | 1037      | 15 | 13 18  |                                         | 534       | 16 | 13 19  |                                         | 172       | 13 | 8 18   |                                        | -2                     | ***              | -3                     | *                |
| Uncontrolled hypertension            |           |    |        |                                         |           |    |        |                                         |           |    |        |                                        |                        |                  |                        |                  |
| Educational level                    | 1998-2002 |    |        | Chi-squared test within period sign **  | 2008-2012 |    |        | Chi-squared test within period sign *   | 2018-2019 |    |        | Chi-squared test within period sign ns | 2018-2019 vs 1998-2002 |                  | 2018-2019 vs 2008-2012 |                  |
|                                      | n         | %  | 95% CI |                                         | n         | %  | 95% CI |                                         | n         | %  | 95% CI |                                        | Diff                   | chi-squared sign | Diff                   | chi-squared sign |
| Higher education                     | 337       | 24 | 19 28  |                                         | 311       | 23 | 18 27  |                                         | 192       | 14 | 9 19   |                                        | -9                     | *                | -8                     | *                |
| Lower education                      | 1037      | 32 | 29 34  |                                         | 534       | 29 | 25 33  |                                         | 172       | 17 | 11 22  |                                        | -15                    | ***              | -12                    | ns               |
| Controlled hypertension              |           |    |        |                                         |           |    |        |                                         |           |    |        |                                        |                        |                  |                        |                  |
| Educational level                    | 1998-2002 |    |        | Chi-squared test within period sign ns  | 2008-2012 |    |        | Chi-squared test within period sign ns  | 2018-2019 |    |        | Chi-squared test within period sign ns | 2018-2019 vs 1998-2002 |                  | 2018-2019 vs 2008-2012 |                  |
|                                      | n         | %  | 95% CI |                                         | n         | %  | 95% CI |                                         | n         | %  | 95% CI |                                        | Diff                   | chi-squared sign | Diff                   | chi-squared sign |
| Higher education                     | 337       | 11 | 7 14   |                                         | 311       | 27 | 22 31  |                                         | 192       | 40 | 33 47  |                                        | 30                     | ***              | 14                     | **               |
| Lower education                      | 1037      | 10 | 8 12   |                                         | 534       | 30 | 26 34  |                                         | 172       | 40 | 32 47  |                                        | 29                     | ***              | 9                      | ns               |

Prevalence are age-standardized by age-standardized by European standard population 2013. CI: confidence interval. Diff: prevalence difference between 2018–2019 and 1998–2002 or 2018–2019 and 2008–2012; the values are approximated taking into account the first decimal of prevalence. Higher education - high school or college; lower education - primary or middle school. Chi-squared test to compare prevalences between periods and among age classes within the period. Raised blood pressure: systolic blood pressure  $\geq 140$  mmHg and/or diastolic blood pressure  $\geq 90$  mmHg. Hypertension: systolic blood pressure  $\geq 140$  mmHg and/or diastolic blood pressure  $\geq 90$  and/or under specific pharmacological treatment. Hypertension is divided into ‘undiagnosed’, ‘diagnosed but untreated’, ‘uncontrolled’ (treated and SBP  $\geq 140$  mmHg or DBP  $\geq 90$  mmHg) and ‘controlled’ (treated and SBP  $< 140$  mmHg and DBP  $< 90$  mmHg). Pool of the following Italian Regions: Piedmont, Lombardy, Liguria, Emilia Romagna, Tuscany, Lazio, Abruzzo, Basilicata, Calabria, and Sicily.

STROBE Statement—Checklist of items that should be included in reports of *cross-sectional studies*

|                              | Item No | Recommendation                                                                                                                                                                                    | Page No             |
|------------------------------|---------|---------------------------------------------------------------------------------------------------------------------------------------------------------------------------------------------------|---------------------|
| <b>Title and abstract</b>    | 1       | (a) Indicate the study's design with a commonly used term in the title or the abstract                                                                                                            | 1 and 2             |
|                              |         | (b) Provide in the abstract an informative and balanced summary of what was done and what was found                                                                                               | 2                   |
| <b>Introduction</b>          |         |                                                                                                                                                                                                   |                     |
| Background/rationale         | 2       | Explain the scientific background and rationale for the investigation being reported                                                                                                              | 4                   |
| Objectives                   | 3       | State specific objectives, including any prespecified hypotheses                                                                                                                                  | 4                   |
| <b>Methods</b>               |         |                                                                                                                                                                                                   |                     |
| Study design                 | 4       | Present key elements of study design early in the paper                                                                                                                                           | 5                   |
| Setting                      | 5       | Describe the setting, locations, and relevant dates, including periods of recruitment, exposure, follow-up, and data collection                                                                   | 5                   |
| Participants                 | 6       | (a) Give the eligibility criteria, and the sources and methods of selection of participants                                                                                                       | 5                   |
| Variables                    | 7       | Clearly define all outcomes, exposures, predictors, potential confounders, and effect modifiers. Give diagnostic criteria, if applicable                                                          | 5 and 6             |
| Data sources/<br>measurement | 8*      | For each variable of interest, give sources of data and details of methods of assessment (measurement). Describe comparability of assessment methods if there is more than one group              | 5 and 6             |
| Bias                         | 9       | Describe any efforts to address potential sources of bias                                                                                                                                         | 14                  |
| Study size                   | 10      | Explain how the study size was arrived at                                                                                                                                                         | 5                   |
| Quantitative variables       | 11      | Explain how quantitative variables were handled in the analyses. If applicable, describe which groupings were chosen and why                                                                      | 5 and 6             |
| Statistical methods          | 12      | (a) Describe all statistical methods, including those used to control for confounding                                                                                                             | 6                   |
|                              |         | (b) Describe any methods used to examine subgroups and interactions                                                                                                                               | 6                   |
|                              |         | (c) Explain how missing data were addressed                                                                                                                                                       | 6                   |
|                              |         | (d) If applicable, describe analytical methods taking account of sampling strategy                                                                                                                | 5                   |
|                              |         | (e) Describe any sensitivity analyses                                                                                                                                                             | na                  |
| <b>Results</b>               |         |                                                                                                                                                                                                   |                     |
| Participants                 | 13*     | (a) Report numbers of individuals at each stage of study—eg numbers potentially eligible, examined for eligibility, confirmed eligible, included in the study, completing follow-up, and analysed | 6 and in all tables |
|                              |         | (b) Give reasons for non-participation at each stage                                                                                                                                              | 6                   |
|                              |         | (c) Consider use of a flow diagram                                                                                                                                                                | na                  |
| Descriptive data             | 14*     | (a) Give characteristics of study participants (eg demographic, clinical, social) and information on exposures and potential confounders                                                          | 6 and table s1      |
|                              |         | (b) Indicate number of participants with missing data for each variable of interest                                                                                                               | 6 and in all tables |

|                          |     |                                                                                                                                                                                                              |                            |
|--------------------------|-----|--------------------------------------------------------------------------------------------------------------------------------------------------------------------------------------------------------------|----------------------------|
| Outcome data             | 15* | Report numbers of outcome events or summary measures                                                                                                                                                         | 6 and in all tables        |
| Main results             | 16  | (a) Give unadjusted estimates and, if applicable, confounder-adjusted estimates and their precision (eg, 95% confidence interval). Make clear which confounders were adjusted for and why they were included | 6-12 and in all tables     |
|                          |     | (b) Report category boundaries when continuous variables were categorized                                                                                                                                    | 6-12 and in related tables |
|                          |     | (c) If relevant, consider translating estimates of relative risk into absolute risk for a meaningful time period                                                                                             | na                         |
| Other analyses           | 17  | Report other analyses done—eg analyses of subgroups and interactions, and sensitivity analyses                                                                                                               | 6-12 and in all tables     |
| <b>Discussion</b>        |     |                                                                                                                                                                                                              |                            |
| Key results              | 18  | Summarise key results with reference to study objectives                                                                                                                                                     | 6-13                       |
| Limitations              | 19  | Discuss limitations of the study, taking into account sources of potential bias or imprecision. Discuss both direction and magnitude of any potential bias                                                   | 14                         |
| Interpretation           | 20  | Give a cautious overall interpretation of results considering objectives, limitations, multiplicity of analyses, results from similar studies, and other relevant evidence                                   | 14-15                      |
| Generalisability         | 21  | Discuss the generalisability (external validity) of the study results                                                                                                                                        | 12-15                      |
| <b>Other information</b> |     |                                                                                                                                                                                                              |                            |
| Funding                  | 22  | Give the source of funding and the role of the funders for the present study and, if applicable, for the original study on which the present article is based                                                | 18                         |

\*Give information separately for exposed and unexposed groups.

**Note:** An Explanation and Elaboration article discusses each checklist item and gives methodological background and published examples of transparent reporting. The STROBE checklist is best used in conjunction with this article (freely available on the Web sites of PLoS Medicine at <http://www.plosmedicine.org/>, Annals of Internal Medicine at <http://www.annals.org/>, and Epidemiology at <http://www.epidem.com/>). Information on the STROBE Initiative is available at [www.strobe-statement.org](http://www.strobe-statement.org).
