# Supplementary material for: Trends of blood pressure, raised blood pressure, hypertension and its control among Italian adults: CUORE Project cross-sectional health examination surveys 1998/2008/2018
Source: PubMed Central journal article supplement — BMJ Open. 2022 Nov 14;12(11):e064270. doi: 10.1136/bmjopen-2022-064270 (PMC9664280; doi:10.1136/bmjopen-2022-064270), 2022-11-14
Supplement: bmjopen-2022-064270supp001.pdf [file bmjopen-2022-064270supp001.pdf]

**Table S1. Demographic characteristics of men and women with available blood pressure measurements and information on the use of specific drug treatment within the CUORE Project Surveys 1998-2002, 2008-2012 and 2018-2019.**

|                          | <b>MEN</b>       |          |                  |          |                  |          |
|--------------------------|------------------|----------|------------------|----------|------------------|----------|
|                          | <b>1998-2002</b> |          | <b>2008-2012</b> |          | <b>2018-2019</b> |          |
| <b>Age class (years)</b> | <b>n</b>         | <b>%</b> | <b>n</b>         | <b>%</b> | <b>n</b>         | <b>%</b> |
| 35-44                    | 717              | 24       | 530              | 24       | 248              | 24       |
| 45-54                    | 752              | 25       | 588              | 27       | 248              | 24       |
| 55-64                    | 784              | 26       | 564              | 25       | 277              | 27       |
| 65-74                    | 732              | 25       | 536              | 24       | 258              | 25       |
| <b>Educational level</b> | <b>n</b>         | <b>%</b> | <b>n</b>         | <b>%</b> | <b>n</b>         | <b>%</b> |
| Higher education         | 1249             | 42       | 1183             | 54       | 725              | 71       |
| Lower education          | 1730             | 58       | 1018             | 46       | 303              | 29       |
|                          | <b>WOMEN</b>     |          |                  |          |                  |          |
|                          | <b>1998-2002</b> |          | <b>2008-2012</b> |          | <b>2018-2019</b> |          |
| <b>Age class (years)</b> | <b>n</b>         | <b>%</b> | <b>n</b>         | <b>%</b> | <b>n</b>         | <b>%</b> |
| 35-44                    | 715              | 24       | 514              | 23       | 237              | 22       |
| 45-54                    | 769              | 26       | 577              | 26       | 271              | 25       |
| 55-64                    | 778              | 26       | 584              | 27       | 280              | 26       |
| 65-74                    | 693              | 23       | 529              | 24       | 278              | 26       |
| <b>Educational level</b> | <b>n</b>         | <b>%</b> | <b>n</b>         | <b>%</b> | <b>n</b>         | <b>%</b> |
| Higher education         | 1052             | 36       | 1167             | 53       | 725              | 68       |
| Lower education          | 1887             | 64       | 1017             | 47       | 339              | 32       |

Pool of the following Italian Regions: Piedmont, Lombardy, Liguria, Emilia Romagna, Tuscany, Lazio, Abruzzo, Basilicata, Calabria, and Sicily. Higher education - high school or college; lower education - primary or middle school.

**Table S2. Blood pressure and heart rate measurements mean levels by age class and period. Italian resident men aged 35–74 years, the CUORE Project Surveys 1998-2002, 2008-2012 and 2018-2019.**

| MEN                                                      |           |      |    |         |                              |           |      |    |         |                              |           |      |    |         |                              |                        |             |                        |             |
|----------------------------------------------------------|-----------|------|----|---------|------------------------------|-----------|------|----|---------|------------------------------|-----------|------|----|---------|------------------------------|------------------------|-------------|------------------------|-------------|
| Systolic blood pressure (mmHg)                           |           |      |    |         |                              |           |      |    |         |                              |           |      |    |         |                              |                        |             |                        |             |
| Age class (years)                                        | 1998-2002 |      |    |         | ANOVA within period sign *** | 2008-2012 |      |    |         | ANOVA within period sign *** | 2018-2019 |      |    |         | ANOVA within period sign *** | 2018-2019 vs 1998-2002 |             | 2018-2019 vs 2008-2012 |             |
|                                                          | n         | mean | DS | 95% CI  |                              | n         | mean | DS | 95% CI  |                              | n         | mean | DS | 95% CI  |                              | Diff                   | t-test sign | Diff                   | t-test sign |
| 35-44                                                    | 717       | 128  | 15 | 127 129 |                              | 530       | 125  | 13 | 124 126 |                              | 248       | 127  | 11 | 126 128 |                              | -1                     | ns          | 2                      | *           |
| 45-54                                                    | 752       | 133  | 18 | 131 134 |                              | 588       | 131  | 16 | 130 132 |                              | 248       | 130  | 16 | 128 132 |                              | -2                     | *           | -1                     | ns          |
| 55-64                                                    | 784       | 141  | 20 | 139 142 |                              | 564       | 135  | 17 | 134 136 |                              | 277       | 134  | 14 | 132 135 |                              | -7                     | ***         | -1                     | ns          |
| 65-74                                                    | 732       | 148  | 20 | 146 149 |                              | 536       | 141  | 18 | 139 142 |                              | 258       | 136  | 17 | 134 138 |                              | -11                    | ***         | -4                     | **          |
| Diastolic blood pressure (mmHg)                          |           |      |    |         |                              |           |      |    |         |                              |           |      |    |         |                              |                        |             |                        |             |
| Age class (years)                                        | 1998-2002 |      |    |         | ANOVA within period sign *** | 2008-2012 |      |    |         | ANOVA within period sign *** | 2018-2019 |      |    |         | ANOVA within period sign **  | 2018-2019 vs 1998-2002 |             | 2018-2019 vs 2008-2012 |             |
|                                                          | n         | mean | DS | 95% CI  |                              | n         | mean | DS | 95% CI  |                              | n         | mean | DS | 95% CI  |                              | Diff                   | t-test sign | Diff                   | t-test sign |
| 35-44                                                    | 717       | 85   | 11 | 84 86   |                              | 530       | 83   | 10 | 82 83   |                              | 248       | 76   | 10 | 75 77   |                              | -9                     | ***         | -7                     | ***         |
| 45-54                                                    | 752       | 87   | 11 | 87 88   |                              | 588       | 86   | 10 | 85 87   |                              | 248       | 79   | 11 | 77 80   |                              | -9                     | ***         | -7                     | ***         |
| 55-64                                                    | 784       | 87   | 11 | 87 88   |                              | 564       | 84   | 10 | 83 85   |                              | 277       | 79   | 9  | 78 80   |                              | -8                     | ***         | -5                     | ***         |
| 65-74                                                    | 732       | 86   | 10 | 85 86   |                              | 536       | 81   | 10 | 80 82   |                              | 258       | 76   | 10 | 75 77   |                              | -10                    | ***         | -5                     | ***         |
| Systolic blood pressure not under drug treatment (mmHg)  |           |      |    |         |                              |           |      |    |         |                              |           |      |    |         |                              |                        |             |                        |             |
| Age class (years)                                        | 1998-2002 |      |    |         | ANOVA within period sign *** | 2008-2012 |      |    |         | ANOVA within period sign *** | 2018-2019 |      |    |         | ANOVA within period sign *** | 2018-2019 vs 1998-2002 |             | 2018-2019 vs 2008-2012 |             |
|                                                          | n         | mean | DS | 95% CI  |                              | n         | mean | DS | 95% CI  |                              | n         | mean | DS | 95% CI  |                              | Diff                   | t-test sign | Diff                   | t-test sign |
| 35-44                                                    | 682       | 127  | 14 | 126 128 |                              | 504       | 125  | 13 | 123 126 |                              | 237       | 127  | 11 | 125 128 |                              | -0.2                   | ns          | 2                      | *           |
| 45-54                                                    | 640       | 131  | 17 | 130 132 |                              | 481       | 129  | 16 | 127 130 |                              | 212       | 128  | 14 | 126 130 |                              | -3                     | *           | -1                     | ns          |
| 55-64                                                    | 581       | 137  | 19 | 136 139 |                              | 370       | 133  | 17 | 131 135 |                              | 170       | 133  | 14 | 131 135 |                              | -4                     | **          | -0.2                   | ns          |
| 65-74                                                    | 454       | 143  | 20 | 142 145 |                              | 252       | 138  | 18 | 136 140 |                              | 125       | 138  | 18 | 134 141 |                              | -6                     | **          | -1                     | ns          |
| Diastolic blood pressure not under drug treatment (mmHg) |           |      |    |         |                              |           |      |    |         |                              |           |      |    |         |                              |                        |             |                        |             |
| Age class (years)                                        | 1998-2002 |      |    |         | ANOVA within period sign **  | 2008-2012 |      |    |         | ANOVA within period sign *** | 2018-2019 |      |    |         | ANOVA within period sign ns  | 2018-2019 vs 1998-2002 |             | 2018-2019 vs 2008-2012 |             |
|                                                          | n         | mean | DS | 95% CI  |                              | n         | mean | DS | 95% CI  |                              | n         | mean | DS | 95% CI  |                              | Diff                   | t-test sign | Diff                   | t-test sign |
| 35-44                                                    | 682       | 85   | 10 | 84 85   |                              | 504       | 82   | 10 | 81 83   |                              | 237       | 75   | 10 | 74 77   |                              | -9                     | ***         | -7                     | ***         |
| 45-54                                                    | 640       | 86   | 11 | 86 87   |                              | 481       | 85   | 10 | 84 86   |                              | 212       | 77   | 10 | 76 78   |                              | -9                     | ***         | -8                     | ***         |
| 55-64                                                    | 581       | 86   | 10 | 85 87   |                              | 370       | 84   | 10 | 83 85   |                              | 170       | 78   | 9  | 77 79   |                              | -8                     | ***         | -6                     | ***         |
| 65-74                                                    | 454       | 84   | 10 | 83 85   |                              | 252       | 81   | 10 | 80 82   |                              | 125       | 77   | 11 | 75 79   |                              | -8                     | ***         | -4                     | **          |
| Heart rate (beats per minute)                            |           |      |    |         |                              |           |      |    |         |                              |           |      |    |         |                              |                        |             |                        |             |
| Age class (years)                                        | 1998-2002 |      |    |         | ANOVA within period sign ns  | 2008-2012 |      |    |         | ANOVA within period sign ns  | 2018-2019 |      |    |         | ANOVA within period sign ns  | 2018-2019 vs 1998-2002 |             | 2018-2019 vs 2008-2012 |             |
|                                                          | n         | mean | DS | 95% CI  |                              | n         | mean | DS | 95% CI  |                              | n         | mean | DS | 95% CI  |                              | Diff                   | t-test sign | Diff                   | t-test sign |
| 35-44                                                    | 715       | 66   | 10 | 65 67   |                              | 530       | 68   | 9  | 67 69   |                              | 248       | 72   | 12 | 70 73   |                              | 6                      | ***         | 4                      | ***         |
| 45-54                                                    | 750       | 66   | 11 | 65 67   |                              | 588       | 69   | 10 | 68 70   |                              | 248       | 72   | 11 | 71 74   |                              | 6                      | ***         | 3                      | ***         |
| 55-64                                                    | 783       | 66   | 11 | 65 67   |                              | 564       | 68   | 10 | 68 69   |                              | 277       | 72   | 12 | 70 73   |                              | 6                      | ***         | 3                      | ***         |
| 65-74                                                    | 732       | 66   | 11 | 65 67   |                              | 536       | 69   | 10 | 68 69   |                              | 258       | 70   | 12 | 69 72   |                              | 4                      | ***         | 2                      | ns          |

SD: standard deviation; CI: confidence interval. Diff: mean difference between 2018–2019 and 1998–2002 or 2018–2019 and 2008–2012; the values are approximated taking into account the first decimal of means. ANOVA: Analysis of Variance to compare variables among age classes within periods. t-test to compare variables between periods. \*\*\* p-value<0.0001; \*\* p-value<0.01; \*p-value<0.05; ns not significant p-value. Pool of the following Italian Regions: Piedmont, Lombardy, Liguria, Emilia Romagna, Tuscany, Lazio, Abruzzo, Basilicata, Calabria, and Sicily.

**Table S3. Blood pressure and heart rate measurements mean levels by age class and period. Italian resident women aged 35–74 years, the CUORE Project Surveys 1998-2002, 2008-2012 and 2018-2019.**

| WOMEN                                                    |           |      |    |         |                                 |           |      |         |        |                                 |           |         |     |        |                                 |                        |             |                        |             |
|----------------------------------------------------------|-----------|------|----|---------|---------------------------------|-----------|------|---------|--------|---------------------------------|-----------|---------|-----|--------|---------------------------------|------------------------|-------------|------------------------|-------------|
| Systolic blood pressure (mmHg)                           |           |      |    |         |                                 |           |      |         |        |                                 |           |         |     |        |                                 |                        |             |                        |             |
| Age class (years)                                        | 1998-2002 |      |    |         | ANOVA within period sign<br>*** | 2008-2012 |      |         |        | ANOVA within period sign<br>*** | 2018-2019 |         |     |        | ANOVA within period sign<br>*** | 2018-2019 vs 1998-2002 |             | 2018-2019 vs 2008-2012 |             |
|                                                          | n         | mean | DS | 95% CI  |                                 | n         | mean | DS      | 95% CI |                                 | n         | mean    | DS  | 95% CI |                                 | Diff                   | t-test sign | Diff                   | t-test sign |
| 35-44                                                    | 715       | 118  | 14 | 117 119 | 514                             | 114       | 13   | 113 116 | 237    | 113                             | 13        | 111 114 | -6  | ***    | -2                              | ns                     |             |                        |             |
| 45-54                                                    | 769       | 128  | 18 | 126 129 | 577                             | 122       | 15   | 121 123 | 271    | 120                             | 16        | 118 121 | -8  | ***    | -2                              | *                      |             |                        |             |
| 55-64                                                    | 778       | 139  | 20 | 137 140 | 584                             | 132       | 18   | 131 134 | 280    | 125                             | 16        | 123 127 | -14 | ***    | -7                              | ***                    |             |                        |             |
| 65-74                                                    | 693       | 147  | 20 | 146 149 | 529                             | 143       | 20   | 141 144 | 278    | 133                             | 19        | 130 135 | -15 | ***    | -10                             | ***                    |             |                        |             |
| Diastolic blood pressure (mmHg)                          |           |      |    |         |                                 |           |      |         |        |                                 |           |         |     |        |                                 |                        |             |                        |             |
| Age class (years)                                        | 1998-2002 |      |    |         | ANOVA within period sign<br>*** | 2008-2012 |      |         |        | ANOVA within period sign<br>*** | 2018-2019 |         |     |        | ANOVA within period sign<br>*** | 2018-2019 vs 1998-2002 |             | 2018-2019 vs 2008-2012 |             |
|                                                          | n         | mean | DS | 95% CI  |                                 | n         | mean | DS      | 95% CI |                                 | n         | mean    | DS  | 95% CI |                                 | Diff                   | t-test sign | Diff                   | t-test sign |
| 35-44                                                    | 715       | 78   | 10 | 77 78   | 514                             | 75        | 9    | 74 75   | 237    | 70                              | 10        | 68 71   | -8  | ***    | -5                              | ***                    |             |                        |             |
| 45-54                                                    | 769       | 83   | 11 | 82 83   | 577                             | 79        | 9    | 78 79   | 271    | 74                              | 11        | 72 75   | -9  | ***    | -5                              | ***                    |             |                        |             |
| 55-64                                                    | 778       | 85   | 10 | 84 85   | 584                             | 81        | 10   | 80 82   | 280    | 74                              | 11        | 73 76   | -10 | ***    | -7                              | ***                    |             |                        |             |
| 65-74                                                    | 693       | 85   | 10 | 84 85   | 529                             | 81        | 10   | 80 82   | 278    | 74                              | 11        | 72 75   | -11 | ***    | -7                              | ***                    |             |                        |             |
| Systolic blood pressure not under drug treatment (mmHg)  |           |      |    |         |                                 |           |      |         |        |                                 |           |         |     |        |                                 |                        |             |                        |             |
| Age class (years)                                        | 1998-2002 |      |    |         | ANOVA within period sign<br>*** | 2008-2012 |      |         |        | ANOVA within period sign<br>*** | 2018-2019 |         |     |        | ANOVA within period sign<br>*** | 2018-2019 vs 1998-2002 |             | 2018-2019 vs 2008-2012 |             |
|                                                          | n         | mean | DS | 95% CI  |                                 | n         | mean | DS      | 95% CI |                                 | n         | mean    | DS  | 95% CI |                                 | Diff                   | t-test sign | Diff                   | t-test sign |
| 35-44                                                    | 698       | 118  | 14 | 116 119 | 499                             | 114       | 12   | 113 115 | 234    | 112                             | 13        | 111 114 | -5  | ***    | -1                              | ns                     |             |                        |             |
| 45-54                                                    | 657       | 125  | 17 | 124 126 | 510                             | 120       | 15   | 119 122 | 238    | 118                             | 15        | 116 120 | -7  | ***    | -2                              | *                      |             |                        |             |
| 55-64                                                    | 539       | 134  | 18 | 132 135 | 401                             | 128       | 17   | 126 130 | 203    | 123                             | 17        | 121 126 | -10 | ***    | -4                              | **                     |             |                        |             |
| 65-74                                                    | 374       | 142  | 18 | 140 144 | 244                             | 138       | 20   | 135 140 | 122    | 127                             | 16        | 124 130 | -15 | ***    | -10                             | ***                    |             |                        |             |
| Diastolic blood pressure not under drug treatment (mmHg) |           |      |    |         |                                 |           |      |         |        |                                 |           |         |     |        |                                 |                        |             |                        |             |
| Age class (years)                                        | 1998-2002 |      |    |         | ANOVA within period sign<br>*** | 2008-2012 |      |         |        | ANOVA within period sign<br>*** | 2018-2019 |         |     |        | ANOVA within period sign<br>**  | 2018-2019 vs 1998-2002 |             | 2018-2019 vs 2008-2012 |             |
|                                                          | n         | mean | DS | 95% CI  |                                 | n         | mean | DS      | 95% CI |                                 | n         | mean    | DS  | 95% CI |                                 | Diff                   | t-test sign | Diff                   | t-test sign |
| 35-44                                                    | 698       | 77   | 10 | 76 78   | 499                             | 74        | 8    | 74 75   | 234    | 70                              | 10        | 68 71   | -8  | ***    | -5                              | ***                    |             |                        |             |
| 45-54                                                    | 657       | 81   | 10 | 81 82   | 510                             | 78        | 9    | 77 79   | 238    | 73                              | 11        | 71 74   | -9  | ***    | -5                              | ***                    |             |                        |             |
| 55-64                                                    | 539       | 83   | 10 | 82 83   | 401                             | 79        | 9    | 79 80   | 203    | 73                              | 11        | 72 75   | -9  | ***    | -6                              | ***                    |             |                        |             |
| 65-74                                                    | 374       | 83   | 9  | 82 83   | 244                             | 80        | 9    | 79 81   | 122    | 71                              | 9         | 70 73   | -11 | ***    | -9                              | ***                    |             |                        |             |
| Heart rate (beats per minute)                            |           |      |    |         |                                 |           |      |         |        |                                 |           |         |     |        |                                 |                        |             |                        |             |
| Age class (years)                                        | 1998-2002 |      |    |         | ANOVA within period sign<br>**  | 2008-2012 |      |         |        | ANOVA within period sign<br>ns  | 2018-2019 |         |     |        | ANOVA within period sign<br>ns  | 2018-2019 vs 1998-2002 |             | 2018-2019 vs 2008-2012 |             |
|                                                          | n         | mean | DS | 95% CI  |                                 | n         | mean | DS      | 95% CI |                                 | n         | mean    | DS  | 95% CI |                                 | Diff                   | t-test sign | Diff                   | t-test sign |
| 35-44                                                    | 711       | 71   | 11 | 70 72   | 514                             | 72        | 9    | 71 72   | 237    | 74                              | 11        | 73 75   | 3   | **     | 2                               | **                     |             |                        |             |
| 45-54                                                    | 769       | 70   | 10 | 69 71   | 577                             | 71        | 9    | 70 71   | 271    | 73                              | 10        | 72 74   | 3   | ***    | 3                               | **                     |             |                        |             |
| 55-64                                                    | 776       | 69   | 10 | 68 70   | 584                             | 71        | 9    | 70 72   | 280    | 72                              | 10        | 71 73   | 3   | ***    | 1                               | ns                     |             |                        |             |
| 65-74                                                    | 690       | 69   | 11 | 68 70   | 529                             | 71        | 10   | 70 72   | 278    | 72                              | 11        | 71 73   | 3   | **     | 1                               | ns                     |             |                        |             |

SD: standard deviation; CI: confidence interval. Diff: mean difference between 2018–2019 and 1998–2002 or 2018–2019 and 2008–2012; the values are approximated taking into account the first decimal of means. ANOVA: Analysis of Variance to compare variables among age classes within periods. t-test to compare variables between periods. \*\*\* p-value<0.0001; \*\* p-value<0.01; \*p-value<0.05; ns not significant p-value. Pool of the following Italian Regions: Piedmont, Lombardy, Liguria, Emilia Romagna, Tuscany, Lazio, Abruzzo, Basilicata, Calabria, and Sicily.

**Table S4. Blood pressure measurements and heart rate mean levels by educational level and period. Italian resident men aged 35–74 years, the CUORE Project Surveys 1998–2002, 2008–2012 and 2018–2019.**

| MEN                                                      |           |      |    |         |                                    |           |      |    |         |                                    |           |      |    |         |                                    |           |      |           |        |
|----------------------------------------------------------|-----------|------|----|---------|------------------------------------|-----------|------|----|---------|------------------------------------|-----------|------|----|---------|------------------------------------|-----------|------|-----------|--------|
| Systolic blood pressure (mmHg)                           |           |      |    |         |                                    |           |      |    |         |                                    |           |      |    |         |                                    |           |      |           |        |
| Educational level                                        | 1998-2002 |      |    |         | ANOVA within period<br>sign<br>*** | 2008-2012 |      |    |         | ANOVA within period<br>sign<br>*** | 2018-2019 |      |    |         | ANOVA within period<br>sign<br>*** | 2018-2019 |      | 2018-2019 |        |
|                                                          | n         | mean | DS | 95% CI  |                                    | n         | mean | DS | 95% CI  |                                    | n         | mean | DS | 95% CI  |                                    | n         | mean | DS        | 95% CI |
| Higher education                                         | 1249      | 135  | 17 | 134 136 |                                    | 1183      | 130  | 15 | 129 131 |                                    | 725       | 131  | 14 | 130 132 |                                    | -4        | ***  | 1         | ns     |
| Lower education                                          | 1730      | 136  | 18 | 135 137 |                                    | 1018      | 133  | 17 | 132 134 |                                    | 303       | 134  | 16 | 132 135 |                                    | -3        | **   | 0.2       | ns     |
| Diastolic blood pressure (mmHg)                          |           |      |    |         |                                    |           |      |    |         |                                    |           |      |    |         |                                    |           |      |           |        |
| Educational level                                        | 1998-2002 |      |    |         | ANOVA within period<br>sign<br>ns  | 2008-2012 |      |    |         | ANOVA within period<br>sign<br>ns  | 2018-2019 |      |    |         | ANOVA within period<br>sign<br>ns  | 2018-2019 |      | 2018-2019 |        |
|                                                          | n         | mean | DS | 95% CI  |                                    | n         | mean | DS | 95% CI  |                                    | n         | mean | DS | 95% CI  |                                    | n         | mean | DS        | 95% CI |
| Higher education                                         | 1249      | 87   | 11 | 86 87   |                                    | 1183      | 83   | 10 | 83 84   |                                    | 725       | 77   | 10 | 77 78   |                                    | -9        | ***  | -6        | ***    |
| Lower education                                          | 1730      | 86   | 11 | 86 87   |                                    | 1018      | 84   | 10 | 83 85   |                                    | 303       | 78   | 10 | 77 79   |                                    | -8        | ***  | -6        | ***    |
| Systolic blood pressure not under drug treatment (mmHg)  |           |      |    |         |                                    |           |      |    |         |                                    |           |      |    |         |                                    |           |      |           |        |
| Educational level                                        | 1998-2002 |      |    |         | ANOVA within period<br>sign<br>*** | 2008-2012 |      |    |         | ANOVA within period<br>sign<br>*** | 2018-2019 |      |    |         | ANOVA within period<br>sign<br>*** | 2018-2019 |      | 2018-2019 |        |
|                                                          | n         | mean | DS | 95% CI  |                                    | n         | mean | DS | 95% CI  |                                    | n         | mean | DS | 95% CI  |                                    | n         | mean | DS        | 95% CI |
| Higher education                                         | 1046      | 133  | 16 | 132 134 |                                    | 913       | 129  | 15 | 128 130 |                                    | 537       | 130  | 13 | 129 131 |                                    | -3        | ***  | 1         | ns     |
| Lower education                                          | 1305      | 134  | 17 | 133 135 |                                    | 680       | 131  | 16 | 130 133 |                                    | 205       | 133  | 15 | 131 135 |                                    | -1        | ns   | 1         | ns     |
| Diastolic blood pressure not under drug treatment (mmHg) |           |      |    |         |                                    |           |      |    |         |                                    |           |      |    |         |                                    |           |      |           |        |
| Educational level                                        | 1998-2002 |      |    |         | ANOVA within period<br>sign<br>ns  | 2008-2012 |      |    |         | ANOVA within period<br>sign<br>ns  | 2018-2019 |      |    |         | ANOVA within period<br>sign<br>ns  | 2018-2019 |      | 2018-2019 |        |
|                                                          | n         | mean | DS | 95% CI  |                                    | n         | mean | DS | 95% CI  |                                    | n         | mean | DS | 95% CI  |                                    | n         | mean | DS        | 95% CI |
| Higher education                                         | 1046      | 86   | 10 | 85 86   |                                    | 913       | 83   | 10 | 82 83   |                                    | 537       | 77   | 10 | 76 78   |                                    | -9        | ***  | -6        | ***    |
| Lower education                                          | 1305      | 85   | 10 | 85 86   |                                    | 680       | 83   | 10 | 83 84   |                                    | 205       | 77   | 9  | 76 78   |                                    | -8        | ***  | -6        | ***    |
| Heart rate (beats per minute)                            |           |      |    |         |                                    |           |      |    |         |                                    |           |      |    |         |                                    |           |      |           |        |
| Educational level                                        | 1998-2002 |      |    |         | ANOVA within period<br>sign<br>ns  | 2008-2012 |      |    |         | ANOVA within period<br>sign<br>ns  | 2018-2019 |      |    |         | ANOVA within period<br>sign<br>**  | 2018-2019 |      | 2018-2019 |        |
|                                                          | n         | mean | DS | 95% CI  |                                    | n         | mean | DS | 95% CI  |                                    | n         | mean | DS | 95% CI  |                                    | n         | mean | DS        | 95% CI |
| Higher education                                         | 1244      | 66   | 11 | 65 67   |                                    | 1183      | 68   | 9  | 68 69   |                                    | 725       | 71   | 11 | 70 72   |                                    | 5         | ***  | 2         | ***    |
| Lower education                                          | 1730      | 66   | 11 | 65 67   |                                    | 1018      | 68   | 10 | 68 69   |                                    | 303       | 74   | 12 | 73 76   |                                    | 8         | ***  | 6         | ***    |

Means and standard deviations age-standardized by ISTAT Italian population 2000, 2010 and 2019 respectively. SD: standard deviation; CI: confidence interval. Diff: mean difference between 2018–2019 and 1998–2002 or 2018–2019 and 2008–2012; the values are approximated taking into account the first decimal of means. Higher education - high school or college; lower education - primary or middle school. ANOVA: Analysis of Variance to compare variables among age classes within periods. t-test to compare variables between periods. \*\*\* p-value<0.0001; \*\* p-value<0.01; \*p-value<0.05; ns not significant p-value. Pool of the following Italian Regions: Piedmont, Lombardy, Liguria, Emilia Romagna, Tuscany, Lazio, Abruzzo, Basilicata, Calabria, and Sicily.

**Table S5. Blood pressure measurements and heart rate mean levels, by educational level and period. Italian resident women aged 35–74 years, the CUORE Project Surveys 1998–2002, 2008–2012 and 2018–2019.**

| WOMEN                                                    |           |      |     |         |                          |           |      |     |         |                          |           |      |     |         |                          |           |             |           |             |
|----------------------------------------------------------|-----------|------|-----|---------|--------------------------|-----------|------|-----|---------|--------------------------|-----------|------|-----|---------|--------------------------|-----------|-------------|-----------|-------------|
| Systolic blood pressure (mmHg)                           |           |      |     |         |                          |           |      |     |         |                          |           |      |     |         |                          |           |             |           |             |
| Educational level                                        | 1998-2002 |      |     |         | ANOVA within period sign | 2008-2012 |      |     |         | ANOVA within period sign | 2018-2019 |      |     |         | ANOVA within period sign | 2018-2019 |             | 2018-2019 |             |
|                                                          | n         | mean | std | 95% CI  |                          | n         | mean | std | 95% CI  |                          | n         | mean | std | 95% CI  |                          | Diff      | t-test sign | Diff      | t-test sign |
| Higher education                                         | 1052      | 130  | 16  | 129 131 | ***                      | 1167      | 124  | 15  | 123 124 | ***                      | 725       | 120  | 15  | 119 122 | ***                      | -9        | ***         | -3        | ***         |
| Lower education                                          | 1887      | 133  | 18  | 132 134 |                          | 1017      | 129  | 18  | 128 130 |                          | 339       | 126  | 17  | 124 127 |                          | -7        | ***         | -4        | **          |
| Diastolic blood pressure (mmHg)                          |           |      |     |         |                          |           |      |     |         |                          |           |      |     |         |                          |           |             |           |             |
| Educational level                                        | 1998-2002 |      |     |         | ANOVA within period sign | 2008-2012 |      |     |         | ANOVA within period sign | 2018-2019 |      |     |         | ANOVA within period sign | 2018-2019 |             | 2018-2019 |             |
|                                                          | n         | mean | std | 95% CI  |                          | n         | mean | std | 95% CI  |                          | n         | mean | std | 95% CI  |                          | Diff      | t-test sign | Diff      | t-test sign |
| Higher education                                         | 1052      | 81   | 10  | 81 82   | ***                      | 1167      | 78   | 9   | 77 78   | ***                      | 725       | 72   | 11  | 72 73   | **                       | -9        | ***         | -5        | ***         |
| Lower education                                          | 1887      | 83   | 10  | 82 83   |                          | 1017      | 79   | 10  | 79 80   |                          | 339       | 74   | 10  | 73 75   |                          | -8        | ***         | -5        | ***         |
| Systolic blood pressure not under drug treatment (mmHg)  |           |      |     |         |                          |           |      |     |         |                          |           |      |     |         |                          |           |             |           |             |
| Educational level                                        | 1998-2002 |      |     |         | ANOVA within period sign | 2008-2012 |      |     |         | ANOVA within period sign | 2018-2019 |      |     |         | ANOVA within period sign | 2018-2019 |             | 2018-2019 |             |
|                                                          | n         | mean | std | 95% CI  |                          | n         | mean | std | 95% CI  |                          | n         | mean | std | 95% CI  |                          | Diff      | t-test sign | Diff      | t-test sign |
| Higher education                                         | 928       | 128  | 16  | 127 129 | ***                      | 992       | 121  | 14  | 120 122 | ***                      | 593       | 119  | 15  | 118 120 | ***                      | -9        | ***         | -2        | **          |
| Lower education                                          | 1331      | 129  | 16  | 129 130 |                          | 651       | 127  | 16  | 126 128 |                          | 203       | 124  | 16  | 121 126 |                          | -6        | ***         | -3        | *           |
| Diastolic blood pressure not under drug treatment (mmHg) |           |      |     |         |                          |           |      |     |         |                          |           |      |     |         |                          |           |             |           |             |
| Educational level                                        | 1998-2002 |      |     |         | ANOVA within period sign | 2008-2012 |      |     |         | ANOVA within period sign | 2018-2019 |      |     |         | ANOVA within period sign | 2018-2019 |             | 2018-2019 |             |
|                                                          | n         | mean | std | 95% CI  |                          | n         | mean | std | 95% CI  |                          | n         | mean | std | 95% CI  |                          | Diff      | t-test sign | Diff      | t-test sign |
| Higher education                                         | 928       | 81   | 10  | 80 81   | ***                      | 992       | 77   | 9   | 76 78   | ***                      | 593       | 71   | 10  | 71 72   | *                        | -9        | ***         | -6        | ***         |
| Lower education                                          | 1331      | 81   | 10  | 81 82   |                          | 651       | 78   | 9   | 78 79   |                          | 203       | 73   | 10  | 72 75   |                          | -8        | ***         | -5        | ***         |
| Heart rate (beats per minute)                            |           |      |     |         |                          |           |      |     |         |                          |           |      |     |         |                          |           |             |           |             |
| Educational level                                        | 1998-2002 |      |     |         | ANOVA within period sign | 2008-2012 |      |     |         | ANOVA within period sign | 2018-2019 |      |     |         | ANOVA within period sign | 2018-2019 |             | 2018-2019 |             |
|                                                          | n         | mean | std | 95% CI  |                          | n         | mean | std | 95% CI  |                          | n         | mean | std | 95% CI  |                          | Diff      | t-test sign | Diff      | t-test sign |
| Higher education                                         | 1047      | 69   | 11  | 69 70   | ns                       | 1167      | 71   | 9   | 70 72   | ns                       | 725       | 73   | 10  | 72 73   | ns                       | 3         | ***         | 2         | **          |
| Lower education                                          | 1884      | 70   | 11  | 69 70   |                          | 1017      | 71   | 10  | 71 72   |                          | 339       | 73   | 11  | 72 74   |                          | 3         | ***         | 2         | **          |

Means and standard deviations age-standardized by ISTAT Italian population 2000, 2010 and 2019 respectively. SD: standard deviation; CI: confidence interval. Diff: mean difference between 2018–2019 and 1998–2002 or 2018–2019 and 2008–2012; the values are approximated taking into account the first decimal of means. Higher education - high school or college; lower education - primary or middle school. ANOVA: Analysis of Variance to compare variables among age classes within periods. t-test to compare variables between periods. \*\*\* p-value<0.0001; \*\* p-value<0.01; \*p-value<0.05; ns not significant p-value. Pool of the following Italian Regions: Lombardy, Piedmont, Liguria, Emilia Romagna, Tuscany, Lazio, Abruzzo, Basilicata, Calabria, and Sicily.

**Table S6. Prevalence of blood pressure treatment, raised blood pressure, hypertension and state of hypertension control based on measurements, by age class and period. Italian resident men aged 35–74 years, the CUORE Project Surveys 1998–2002, 2008–2012 and 2018–2019.**

| MEN                                  |           |    |        |                                     |           |    |        |                                     |           |    |        |                                     |                        |                  |                        |                  |
|--------------------------------------|-----------|----|--------|-------------------------------------|-----------|----|--------|-------------------------------------|-----------|----|--------|-------------------------------------|------------------------|------------------|------------------------|------------------|
| Blood pressure drug treatment        |           |    |        |                                     |           |    |        |                                     |           |    |        |                                     |                        |                  |                        |                  |
| Age class (years)                    | 1998–2002 |    |        | Chi-squared test within period sign | 2008–2012 |    |        | Chi-squared test within period sign | 2018–2019 |    |        | Chi-squared test within period sign | 2018–2019 vs 1998–2002 |                  | 2018–2019 vs 2008–2012 |                  |
|                                      | n         | %  | 95% CI |                                     | n         | %  | 95% CI |                                     | n         | %  | 95% CI |                                     | Diff                   | chi-squared sign | Diff                   | chi-squared sign |
| 35–44                                | 717       | 5  | 3 6    | ***                                 | 530       | 5  | 3 7    | ***                                 | 248       | 4  | 2 7    | ***                                 | -0.4                   | ns               | -0.5                   | ns               |
| 45–54                                | 752       | 15 | 12 17  |                                     | 588       | 18 | 15 21  |                                     | 248       | 15 | 10 19  |                                     | -0.4                   | ns               | -4                     | ns               |
| 55–64                                | 784       | 26 | 23 29  |                                     | 564       | 34 | 30 38  |                                     | 277       | 39 | 33 44  |                                     | 13                     | ***              | 4                      | ns               |
| 65–74                                | 732       | 38 | 34 41  |                                     | 536       | 53 | 49 57  |                                     | 258       | 52 | 45 58  |                                     | 14                     | **               | -1                     | ns               |
| Raised blood pressure                |           |    |        |                                     |           |    |        |                                     |           |    |        |                                     |                        |                  |                        |                  |
| Age class (years)                    | 1998–2002 |    |        | Chi-squared test within period sign | 2008–2012 |    |        | Chi-squared test within period sign | 2018–2019 |    |        | Chi-squared test within period sign | 2018–2019 vs 1998–2002 |                  | 2018–2019 vs 2008–2012 |                  |
|                                      | n         | %  | 95% CI |                                     | n         | %  | 95% CI |                                     | n         | %  | 95% CI |                                     | Diff                   | chi-squared sign | Diff                   | chi-squared sign |
| 35–44                                | 717       | 33 | 30 37  | ***                                 | 530       | 26 | 22 29  | ***                                 | 248       | 19 | 14 23  | ***                                 | -15                    | ***              | -7                     | *                |
| 45–54                                | 752       | 46 | 43 50  |                                     | 588       | 40 | 36 44  |                                     | 248       | 26 | 20 31  |                                     | -21                    | ***              | -14                    | ***              |
| 55–64                                | 784       | 59 | 56 63  |                                     | 564       | 46 | 41 50  |                                     | 277       | 35 | 29 40  |                                     | -25                    | ***              | -11                    | **               |
| 65–74                                | 732       | 70 | 67 73  |                                     | 536       | 55 | 51 60  |                                     | 258       | 43 | 37 49  |                                     | -27                    | ***              | -12                    | **               |
| Hypertension                         |           |    |        |                                     |           |    |        |                                     |           |    |        |                                     |                        |                  |                        |                  |
| Age class (years)                    | 1998–2002 |    |        | Chi-squared test within period sign | 2008–2012 |    |        | Chi-squared test within period sign | 2018–2019 |    |        | Chi-squared test within period sign | 2018–2019 vs 1998–2002 |                  | 2018–2019 vs 2008–2012 |                  |
|                                      | n         | %  | 95% CI |                                     | n         | %  | 95% CI |                                     | n         | %  | 95% CI |                                     | Diff                   | chi-squared sign | Diff                   | chi-squared sign |
| 35–44                                | 717       | 35 | 31 38  | ***                                 | 530       | 28 | 24 32  | ***                                 | 248       | 21 | 16 26  | **                                  | -14                    | ***              | -7                     | *                |
| 45–54                                | 752       | 51 | 47 54  |                                     | 588       | 46 | 42 50  |                                     | 248       | 32 | 26 38  |                                     | -19                    | ***              | -14                    | **               |
| 55–64                                | 784       | 64 | 61 68  |                                     | 564       | 62 | 58 66  |                                     | 277       | 58 | 53 64  |                                     | -6                     | ns               | -3                     | ns               |
| 65–74                                | 732       | 76 | 72 79  |                                     | 536       | 76 | 72 80  |                                     | 258       | 74 | 69 79  |                                     | -2                     | ns               | -2                     | ns               |
| Undiagnosed hypertension             |           |    |        |                                     |           |    |        |                                     |           |    |        |                                     |                        |                  |                        |                  |
| Age class (years)                    | 1998–2002 |    |        | Chi-squared test within period sign | 2008–2012 |    |        | Chi-squared test within period sign | 2018–2019 |    |        | Chi-squared test within period sign | 2018–2019 vs 1998–2002 |                  | 2018–2019 vs 2008–2012 |                  |
|                                      | n         | %  | 95% CI |                                     | n         | %  | 95% CI |                                     | n         | %  | 95% CI |                                     | Diff                   | chi-squared sign | Diff                   | chi-squared sign |
| 35–44                                | 249       | 67 | 62 73  | **                                  | 149       | 54 | 46 62  | ***                                 | 52        | 62 | 48 75  | ***                                 | -6                     | ns               | 8                      | ns               |
| 45–54                                | 380       | 52 | 47 57  |                                     | 269       | 40 | 34 46  |                                     | 79        | 35 | 25 46  |                                     | -16                    | **               | -4                     | ns               |
| 55–64                                | 505       | 48 | 44 52  |                                     | 349       | 32 | 27 37  |                                     | 162       | 23 | 17 30  |                                     | -25                    | ***              | -8                     | ns               |
| 65–74                                | 553       | 39 | 35 43  |                                     | 407       | 25 | 20 29  |                                     | 191       | 21 | 16 27  |                                     | -18                    | ***              | -3                     | ns               |
| Diagnosed but untreated hypertension |           |    |        |                                     |           |    |        |                                     |           |    |        |                                     |                        |                  |                        |                  |
| Age class (years)                    | 1998–2002 |    |        | Chi-squared test within period sign | 2008–2012 |    |        | Chi-squared test within period sign | 2018–2019 |    |        | Chi-squared test within period sign | 2018–2019 vs 1998–2002 |                  | 2018–2019 vs 2008–2012 |                  |
|                                      | n         | %  | 95% CI |                                     | n         | %  | 95% CI |                                     | n         | %  | 95% CI |                                     | Diff                   | chi-squared sign | Diff                   | chi-squared sign |
| 35–44                                | 249       | 18 | 14 23  | ***                                 | 149       | 29 | 22 36  | ***                                 | 52        | 17 | 7 28   | ns                                  | -1                     | ns               | -12                    | ns               |
| 45–54                                | 380       | 19 | 15 23  |                                     | 269       | 20 | 16 25  |                                     | 79        | 19 | 10 28  |                                     | 0.0                    | ns               | -1                     | ns               |
| 55–64                                | 505       | 12 | 9 14   |                                     | 349       | 13 | 9 16   |                                     | 162       | 10 | 6 15   |                                     | -1                     | ns               | -2                     | ns               |
| 65–74                                | 553       | 10 | 8 13   |                                     | 407       | 6  | 3 8    |                                     | 191       | 9  | 5 13   |                                     | -1                     | ns               | 3                      | ns               |
| Uncontrolled hypertension            |           |    |        |                                     |           |    |        |                                     |           |    |        |                                     |                        |                  |                        |                  |
| Age class (years)                    | 1998–2002 |    |        | Chi-squared test within period sign | 2008–2012 |    |        | Chi-squared test within period sign | 2018–2019 |    |        | Chi-squared test within period sign | 2018–2019 vs 1998–2002 |                  | 2018–2019 vs 2008–2012 |                  |
|                                      | n         | %  | 95% CI |                                     | n         | %  | 95% CI |                                     | n         | %  | 95% CI |                                     | Diff                   | chi-squared sign | Diff                   | chi-squared sign |
| 35–44                                | 249       | 10 | 7 14   | ***                                 | 149       | 9  | 4 13   | ***                                 | 52        | 10 | 2 18   | ns                                  | -1                     | ns               | 1                      | ns               |
| 45–54                                | 380       | 21 | 17 25  |                                     | 269       | 27 | 22 32  |                                     | 79        | 27 | 17 36  |                                     | 5                      | ns               | -1                     | ns               |
| 55–64                                | 505       | 32 | 28 37  |                                     | 349       | 29 | 24 34  |                                     | 162       | 25 | 19 32  |                                     | -7                     | ns               | -4                     | ns               |
| 65–74                                | 553       | 43 | 39 47  |                                     | 407       | 43 | 38 48  |                                     | 191       | 28 | 22 35  |                                     | -15                    | **               | -14                    | **               |
| Controlled hypertension              |           |    |        |                                     |           |    |        |                                     |           |    |        |                                     |                        |                  |                        |                  |
| Age class (years)                    | 1998–2002 |    |        | Chi-squared test within period sign | 2008–2012 |    |        | Chi-squared test within period sign | 2018–2019 |    |        | Chi-squared test within period sign | 2018–2019 vs 1998–2002 |                  | 2018–2019 vs 2008–2012 |                  |
|                                      | n         | %  | 95% CI |                                     | n         | %  | 95% CI |                                     | n         | %  | 95% CI |                                     | Diff                   | chi-squared sign | Diff                   | chi-squared sign |
| 35–44                                | 249       | 4  | 1 6    | ns                                  | 149       | 9  | 4 13   | ***                                 | 52        | 12 | 3 20   | ***                                 | 8                      | *                | 3                      | ns               |
| 45–54                                | 380       | 8  | 5 11   |                                     | 269       | 13 | 9 17   |                                     | 79        | 19 | 10 28  |                                     | 11                     | **               | 6                      | ns               |
| 55–64                                | 505       | 8  | 5 10   |                                     | 349       | 26 | 22 31  |                                     | 162       | 41 | 33 48  |                                     | 33                     | ***              | 14                     | **               |
| 65–74                                | 553       | 7  | 5 9    |                                     | 407       | 27 | 23 31  |                                     | 191       | 41 | 34 48  |                                     | 34                     | ***              | 14                     | **               |

CI: confidence interval. Diff: prevalence difference between 2018–2019 and 1998–2002 or 2018–2019 and 2008–2012; the values are approximated taking into account the first decimal of prevalence. Chi-squared test to compare prevalences between periods and among age classes within the period. Raised blood pressure: systolic blood pressure  $\geq 140$  mmHg and/or diastolic blood pressure  $\geq 90$  mmHg. Hypertension: systolic blood pressure  $\geq 140$  mmHg and/or diastolic blood pressure  $\geq 90$  mmHg and/or under specific pharmacological treatment. Hypertension is divided into 'undiagnosed', 'diagnosed but untreated', 'uncontrolled' (treated and SBP  $\geq 140$  mmHg or DBP  $\geq 90$  mmHg) and 'controlled' (treated and SBP  $< 140$  mmHg and DBP  $< 90$  mmHg). Pool of the following Italian Regions: Piedmont, Lombardy, Liguria, Emilia Romagna, Tuscany, Lazio, Abruzzo, Basilicata, Calabria, and Sicily.



**Table S7. Prevalence of blood pressure treatment, raised blood pressure, hypertension and state of hypertension control based on measurements, by age class and period. Italian resident women aged 35–74 years, the CUORE Project Surveys 1998-2002, 2008-2012 and 2018-2019.**

| WOMEN                                |           |    |        |                                            |           |    |        |                                            |           |    |        |                        |                  |                        |                  |
|--------------------------------------|-----------|----|--------|--------------------------------------------|-----------|----|--------|--------------------------------------------|-----------|----|--------|------------------------|------------------|------------------------|------------------|
| Blood pressure drug treatment        |           |    |        |                                            |           |    |        |                                            |           |    |        |                        |                  |                        |                  |
| Age class (years)                    | 1998-2002 |    |        | Chi-squared test within period sign<br>*** | 2008-2012 |    |        | Chi-squared test within period sign<br>*** | 2018-2019 |    |        | 2018-2019 vs 1998-2002 |                  | 2018-2019 vs 2008-2012 |                  |
|                                      | n         | %  | 95% CI |                                            | n         | %  | 95% CI |                                            | n         | %  | 95% CI | Diff                   | chi-squared sign | Diff                   | chi-squared sign |
| 35-44                                | 715       | 2  | 1 3    |                                            | 514       | 3  | 1 4    |                                            | 237       | 1  | 0 3    | -1                     | ns               | -2                     | ns               |
| 45-54                                | 769       | 15 | 12 17  |                                            | 577       | 12 | 9 14   |                                            | 271       | 12 | 8 16   | -2                     | ns               | 1                      | ns               |
| 55-64                                | 778       | 31 | 27 34  |                                            | 584       | 31 | 28 35  |                                            | 280       | 28 | 22 33  | -3                     | ns               | -4                     | ns               |
| 65-74                                | 693       | 46 | 42 50  |                                            | 529       | 54 | 50 58  |                                            | 278       | 56 | 50 62  | 10                     | **               | 2                      | ns               |
| Raised blood pressure                |           |    |        |                                            |           |    |        |                                            |           |    |        |                        |                  |                        |                  |
| Age class (years)                    | 1998-2002 |    |        | Chi-squared test within period sign<br>*** | 2008-2012 |    |        | Chi-squared test within period sign<br>*** | 2018-2019 |    |        | 2018-2019 vs 1998-2002 |                  | 2018-2019 vs 2008-2012 |                  |
|                                      | n         | %  | 95% CI |                                            | n         | %  | 95% CI |                                            | n         | %  | 95% CI | Diff                   | chi-squared sign | Diff                   | chi-squared sign |
| 35-44                                | 715       | 15 | 12 17  |                                            | 514       | 6  | 4 9    |                                            | 237       | 5  | 2 8    | -9                     | **               | -1                     | ns               |
| 45-54                                | 769       | 33 | 30 37  |                                            | 577       | 18 | 15 21  |                                            | 271       | 13 | 9 16   | -21                    | ***              | -5                     | *                |
| 55-64                                | 778       | 50 | 47 54  |                                            | 584       | 34 | 30 38  |                                            | 280       | 20 | 15 25  | -30                    | ***              | -14                    | ***              |
| 65-74                                | 693       | 68 | 65 72  |                                            | 529       | 54 | 50 58  |                                            | 278       | 31 | 25 36  | -38                    | ***              | -23                    | ***              |
| Hypertension                         |           |    |        |                                            |           |    |        |                                            |           |    |        |                        |                  |                        |                  |
| Age class (years)                    | 1998-2002 |    |        | Chi-squared test within period sign<br>*** | 2008-2012 |    |        | Chi-squared test within period sign<br>*** | 2018-2019 |    |        | 2018-2019 vs 1998-2002 |                  | 2018-2019 vs 2008-2012 |                  |
|                                      | n         | %  | 95% CI |                                            | n         | %  | 95% CI |                                            | n         | %  | 95% CI | Diff                   | chi-squared sign | Diff                   | chi-squared sign |
| 35-44                                | 715       | 15 | 13 18  |                                            | 514       | 8  | 6 11   |                                            | 237       | 6  | 3 9    | -9                     | **               | -2                     | ns               |
| 45-54                                | 769       | 38 | 35 41  |                                            | 577       | 25 | 21 28  |                                            | 271       | 21 | 17 26  | -17                    | ***              | -4                     | ns               |
| 55-64                                | 778       | 58 | 55 61  |                                            | 584       | 49 | 45 53  |                                            | 280       | 40 | 35 46  | -18                    | ***              | -8                     | *                |
| 65-74                                | 693       | 77 | 74 80  |                                            | 529       | 73 | 69 76  |                                            | 278       | 64 | 59 70  | -12                    | ***              | -8                     | *                |
| Undiagnosed hypertension             |           |    |        |                                            |           |    |        |                                            |           |    |        |                        |                  |                        |                  |
| Age class (years)                    | 1998-2002 |    |        | Chi-squared test within period sign<br>*** | 2008-2012 |    |        | Chi-squared test within period sign<br>*** | 2018-2019 |    |        | 2018-2019 vs 1998-2002 |                  | 2018-2019 vs 2008-2012 |                  |
|                                      | n         | %  | 95% CI |                                            | n         | %  | 95% CI |                                            | n         | %  | 95% CI | Diff                   | chi-squared sign | Diff                   | chi-squared sign |
| 35-44                                | 110       | 62 | 53 71  |                                            | 43        | 40 | 25 54  |                                            | 15        | 47 | 21 72  | -15                    | ns               | 7                      | ns               |
| 45-54                                | 292       | 45 | 40 51  |                                            | 144       | 39 | 31 47  |                                            | 58        | 29 | 18 41  | -16                    | *                | -10                    | ns               |
| 55-64                                | 451       | 33 | 29 38  |                                            | 285       | 24 | 19 28  |                                            | 113       | 21 | 14 29  | -12                    | *                | -2                     | ns               |
| 65-74                                | 532       | 32 | 28 36  |                                            | 384       | 20 | 16 23  |                                            | 179       | 11 | 6 15   | -22                    | ***              | -9                     | **               |
| Diagnosed but untreated hypertension |           |    |        |                                            |           |    |        |                                            |           |    |        |                        |                  |                        |                  |
| Age class (years)                    | 1998-2002 |    |        | Chi-squared test within period sign<br>*** | 2008-2012 |    |        | Chi-squared test within period sign<br>**  | 2018-2019 |    |        | 2018-2019 vs 1998-2002 |                  | 2018-2019 vs 2008-2012 |                  |
|                                      | n         | %  | 95% CI |                                            | n         | %  | 95% CI |                                            | n         | %  | 95% CI | Diff                   | chi-squared sign | Diff                   | chi-squared sign |
| 35-44                                | 110       | 23 | 15 31  |                                            | 43        | 26 | 13 39  |                                            | 15        | 33 | 9 57   | 11                     | ns               | 8                      | ns               |
| 45-54                                | 292       | 16 | 12 21  |                                            | 144       | 15 | 9 20   |                                            | 58        | 14 | 5 23   | -3                     | ns               | -1                     | ns               |
| 55-64                                | 451       | 14 | 10 17  |                                            | 285       | 12 | 8 16   |                                            | 113       | 11 | 5 16   | -3                     | ns               | -2                     | ns               |
| 65-74                                | 532       | 8  | 6 10   |                                            | 384       | 6  | 4 9    |                                            | 179       | 2  | 0 4    | -6                     | ***              | -4                     | ***              |
| Uncontrolled hypertension            |           |    |        |                                            |           |    |        |                                            |           |    |        |                        |                  |                        |                  |
| Age class (years)                    | 1998-2002 |    |        | Chi-squared test within period sign<br>*** | 2008-2012 |    |        | Chi-squared test within period sign<br>*** | 2018-2019 |    |        | 2018-2019 vs 1998-2002 |                  | 2018-2019 vs 2008-2012 |                  |
|                                      | n         | %  | 95% CI |                                            | n         | %  | 95% CI |                                            | n         | %  | 95% CI | Diff                   | chi-squared sign | Diff                   | chi-squared sign |
| 35-44                                | 110       | 10 | 4 16   |                                            | 43        | 12 | 2 21   |                                            | 15        | 0  | 0 0    | -10                    | -                | -12                    | -                |
| 45-54                                | 292       | 26 | 21 31  |                                            | 144       | 19 | 12 25  |                                            | 58        | 16 | 6 25   | -11                    | ns               | -3                     | ns               |
| 55-64                                | 451       | 39 | 35 44  |                                            | 285       | 33 | 28 39  |                                            | 113       | 18 | 11 25  | -22                    | ***              | -16                    | **               |
| 65-74                                | 532       | 49 | 45 53  |                                            | 384       | 48 | 43 53  |                                            | 179       | 35 | 28 42  | -14                    | ***              | -14                    | ***              |
| Controlled hypertension              |           |    |        |                                            |           |    |        |                                            |           |    |        |                        |                  |                        |                  |
| Age class (years)                    | 1998-2002 |    |        | Chi-squared test within period sign<br>ns  | 2008-2012 |    |        | Chi-squared test within period sign<br>ns  | 2018-2019 |    |        | 2018-2019 vs 1998-2002 |                  | 2018-2019 vs 2008-2012 |                  |
|                                      | n         | %  | 95% CI |                                            | n         | %  | 95% CI |                                            | n         | %  | 95% CI | Diff                   | chi-squared sign | Diff                   | chi-squared sign |
| 35-44                                | 110       | 5  | 1 10   |                                            | 43        | 23 | 11 36  |                                            | 15        | 20 | 0 40   | 15                     | *                | -3                     | ns               |
| 45-54                                | 292       | 12 | 8 16   |                                            | 144       | 28 | 20 35  |                                            | 58        | 41 | 29 54  | 29                     | ***              | 14                     | ns               |
| 55-64                                | 451       | 14 | 10 17  |                                            | 285       | 31 | 26 36  |                                            | 113       | 50 | 41 60  | 37                     | ***              | 20                     | **               |
| 65-74                                | 532       | 11 | 8 14   |                                            | 384       | 26 | 21 30  |                                            | 179       | 53 | 45 60  | 41                     | ***              | 27                     | *                |

CI: confidence interval. Diff: prevalence difference between 2018–2019 and 1998–2002 or 2018–2019 and 2008–2012; the values are approximated taking into account the first decimal of prevalence. Chi-squared test to compare prevalences between periods and among age classes within the period. Raised blood pressure: systolic blood pressure  $\geq 140$  mmHg and/or diastolic blood pressure  $\geq 90$  mmHg. Hypertension: systolic blood pressure  $\geq 140$  mmHg and/or diastolic blood pressure  $\geq 90$  mmHg and/or under specific pharmacological treatment. Hypertension is divided into 'undiagnosed', 'diagnosed but untreated', 'uncontrolled' (treated and SBP  $\geq 140$  mmHg or DBP  $\geq 90$  mmHg) and 'controlled' (treated and SBP  $< 140$  mmHg and DBP  $< 90$  mmHg). Pool of the following Italian Regions: Piedmont, Lombardy, Liguria, Emilia Romagna, Tuscany, Lazio, Abruzzo, Basilicata, Calabria, and Sicily.

**Table S8. Prevalence of blood pressure treatment, raised blood pressure, hypertension and state of hypertension control based on measurements, by educational class and period. Italian resident men aged 35–74 years, the CUORE Project Surveys 1998-2002, 2008-2012 and 2018-2019.**

| MEN                                  |           |    |        |                                     |           |    |        |                                     |           |    |        |                                     |                        |                  |                        |                  |
|--------------------------------------|-----------|----|--------|-------------------------------------|-----------|----|--------|-------------------------------------|-----------|----|--------|-------------------------------------|------------------------|------------------|------------------------|------------------|
| Blood pressure drug treatment        |           |    |        |                                     |           |    |        |                                     |           |    |        |                                     |                        |                  |                        |                  |
| Educational level                    | 1998-2002 |    |        | Chi-squared test within period sign | 2008-2012 |    |        | Chi-squared test within period sign | 2018-2019 |    |        | Chi-squared test within period sign | 2018-2019 vs 1998-2002 |                  | 2018-2019 vs 2008-2012 |                  |
|                                      | n         | %  | 95% CI |                                     | n         | %  | 95% CI |                                     | n         | %  | 95% CI |                                     | Diff                   | chi-squared sign | Diff                   | chi-squared sign |
| Higher education                     | 1249      | 18 | 16 20  | ns                                  | 1183      | 24 | 22 27  | ns                                  | 725       | 26 | 23 29  | ns                                  | 8                      | ***              | 2                      | ns               |
| Lower education                      | 1730      | 19 | 18 21  |                                     | 1018      | 25 | 22 28  |                                     | 303       | 24 | 19 29  |                                     | 5                      | ns               | -1                     | ns               |
| Raised blood pressure                |           |    |        |                                     |           |    |        |                                     |           |    |        |                                     |                        |                  |                        |                  |
| Educational level                    | 1998-2002 |    |        | Chi-squared test within period sign | 2008-2012 |    |        | Chi-squared test within period sign | 2018-2019 |    |        | Chi-squared test within period sign | 2018-2019 vs 1998-2002 |                  | 2018-2019 vs 2008-2012 |                  |
|                                      | n         | %  | 95% CI |                                     | n         | %  | 95% CI |                                     | n         | %  | 95% CI |                                     | Diff                   | chi-squared sign | Diff                   | chi-squared sign |
| Higher education                     | 1249      | 48 | 45 51  | ns                                  | 1183      | 35 | 33 38  | **                                  | 725       | 28 | 25 31  | ns                                  | -20                    | ***              | -7                     | **               |
| Lower education                      | 1730      | 51 | 49 54  |                                     | 1018      | 43 | 40 46  |                                     | 303       | 34 | 29 39  |                                     | -17                    | ***              | -9                     | **               |
| Hypertension                         |           |    |        |                                     |           |    |        |                                     |           |    |        |                                     |                        |                  |                        |                  |
| Educational level                    | 1998-2002 |    |        | Chi-squared test within period sign | 2008-2012 |    |        | Chi-squared test within period sign | 2018-2019 |    |        | Chi-squared test within period sign | 2018-2019 vs 1998-2002 |                  | 2018-2019 vs 2008-2012 |                  |
|                                      | n         | %  | 95% CI |                                     | n         | %  | 95% CI |                                     | n         | %  | 95% CI |                                     | Diff                   | chi-squared sign | Diff                   | chi-squared sign |
| Higher education                     | 1249      | 51 | 49 54  | *                                   | 1183      | 48 | 45 51  | ns                                  | 725       | 43 | 40 47  | ns                                  | -8                     | **               | -4                     | ns               |
| Lower education                      | 1730      | 55 | 53 58  |                                     | 1018      | 51 | 48 54  |                                     | 303       | 46 | 40 52  |                                     | -9                     | **               | -5                     | ns               |
| Undiagnosed hypertension             |           |    |        |                                     |           |    |        |                                     |           |    |        |                                     |                        |                  |                        |                  |
| Educational level                    | 1998-2002 |    |        | Chi-squared test within period sign | 2008-2012 |    |        | Chi-squared test within period sign | 2018-2019 |    |        | Chi-squared test within period sign | 2018-2019 vs 1998-2002 |                  | 2018-2019 vs 2008-2012 |                  |
|                                      | n         | %  | 95% CI |                                     | n         | %  | 95% CI |                                     | n         | %  | 95% CI |                                     | Diff                   | chi-squared sign | Diff                   | chi-squared sign |
| Higher education                     | 621       | 53 | 49 57  | ns                                  | 555       | 38 | 34 42  | ns                                  | 314       | 36 | 30 41  | ns                                  | -18                    | ***              | -2                     | ns               |
| Lower education                      | 1063      | 54 | 51 57  |                                     | 610       | 40 | 36 44  |                                     | 168       | 38 | 30 45  |                                     | -16                    | **               | -2                     | ns               |
| Diagnosed but untreated hypertension |           |    |        |                                     |           |    |        |                                     |           |    |        |                                     |                        |                  |                        |                  |
| Educational level                    | 1998-2002 |    |        | Chi-squared test within period sign | 2008-2012 |    |        | Chi-squared test within period sign | 2018-2019 |    |        | Chi-squared test within period sign | 2018-2019 vs 1998-2002 |                  | 2018-2019 vs 2008-2012 |                  |
|                                      | n         | %  | 95% CI |                                     | n         | %  | 95% CI |                                     | n         | %  | 95% CI |                                     | Diff                   | chi-squared sign | Diff                   | chi-squared sign |
| Higher education                     | 621       | 16 | 13 19  | ns                                  | 555       | 20 | 17 23  | ns                                  | 314       | 13 | 10 17  | ns                                  | -3                     | ns               | -6                     | *                |
| Lower education                      | 1063      | 15 | 13 17  |                                     | 610       | 16 | 13 19  |                                     | 168       | 16 | 10 21  |                                     | 1                      | ***              | -0.4                   | ns               |
| Uncontrolled hypertension            |           |    |        |                                     |           |    |        |                                     |           |    |        |                                     |                        |                  |                        |                  |
| Educational level                    | 1998-2002 |    |        | Chi-squared test within period sign | 2008-2012 |    |        | Chi-squared test within period sign | 2018-2019 |    |        | Chi-squared test within period sign | 2018-2019 vs 1998-2002 |                  | 2018-2019 vs 2008-2012 |                  |
|                                      | n         | %  | 95% CI |                                     | n         | %  | 95% CI |                                     | n         | %  | 95% CI |                                     | Diff                   | chi-squared sign | Diff                   | chi-squared sign |
| Higher education                     | 621       | 24 | 21 28  | ns                                  | 555       | 21 | 18 25  | **                                  | 314       | 21 | 17 26  | ns                                  | -3                     | ns               | 0.1                    | ns               |
| Lower education                      | 1063      | 25 | 22 27  |                                     | 610       | 29 | 25 32  |                                     | 168       | 26 | 20 33  |                                     | 2                      | ***              | -2                     | ns               |
| Controlled hypertension              |           |    |        |                                     |           |    |        |                                     |           |    |        |                                     |                        |                  |                        |                  |
| Educational level                    | 1998-2002 |    |        | Chi-squared test within period sign | 2008-2012 |    |        | Chi-squared test within period sign | 2018-2019 |    |        | Chi-squared test within period sign | 2018-2019 vs 1998-2002 |                  | 2018-2019 vs 2008-2012 |                  |
|                                      | n         | %  | 95% CI |                                     | n         | %  | 95% CI |                                     | n         | %  | 95% CI |                                     | Diff                   | chi-squared sign | Diff                   | chi-squared sign |
| Higher education                     | 621       | 6  | 4 8    | ns                                  | 555       | 21 | 18 25  | **                                  | 314       | 30 | 25 35  | *                                   | 24                     | ***              | 8                      | **               |
| Lower education                      | 1063      | 7  | 5 8    |                                     | 610       | 15 | 12 18  |                                     | 168       | 20 | 14 26  |                                     | 13                     | **               | 5                      | ns               |

Prevalence are age-standardized by ISTAT Italian population 2000, 2010 and 2019 respectively. CI: confidence interval. Diff: prevalence difference between 2018–2019 and 1998–2002 or 2018–2019 and 2008–2012; the values are approximated taking into account the first decimal of prevalence. Higher education - high school or college; lower education - primary or middle school. Chi-squared test to compare prevalences between periods and among age classes within the period. Raised blood pressure: systolic blood pressure  $\geq 140$  mmHg and/or diastolic blood pressure  $\geq 90$  mmHg. Hypertension: systolic blood pressure  $\geq 140$  mmHg and/or diastolic blood pressure  $\geq 90$  mmHg and/or under specific pharmacological treatment. Hypertension is divided into 'undiagnosed', 'diagnosed but untreated', 'uncontrolled' (treated and SBP  $\geq 140$  mmHg or DBP  $\geq 90$  mmHg) and 'controlled' (treated and SBP  $< 140$  mmHg and DBP  $< 90$  mmHg). Pool of the following Italian Regions: Piedmont, Lombardy, Liguria, Emilia Romagna, Tuscany, Lazio, Abruzzo, Basilicata, Calabria, and Sicily.



**Table S9. Prevalence of blood pressure treatment, raised blood pressure, hypertension and state of hypertension control based on measurements, by educational class and period. Italian resident women aged 35–74 years, the CUORE Project Surveys 1998–2002, 2008–2012 and 2018–2019.**

|                   |           | WOMEN                                |        |                                     |           |    |        |                                     |           |    |        |                                     |      |                        |      |                        |  |
|-------------------|-----------|--------------------------------------|--------|-------------------------------------|-----------|----|--------|-------------------------------------|-----------|----|--------|-------------------------------------|------|------------------------|------|------------------------|--|
|                   |           | Blood pressure drug treatment        |        |                                     |           |    |        |                                     |           |    |        |                                     |      | 2018–2019 vs 1998–2002 |      | 2018–2019 vs 2008–2012 |  |
| Educational level | 1998–2002 |                                      |        | Chi-squared test within period sign | 2008–2012 |    |        | Chi-squared test within period sign | 2018–2019 |    |        | Chi-squared test within period sign | Diff | chi-squared sign       | Diff | chi-squared sign       |  |
|                   | n         | %                                    | 95% CI |                                     | n         | %  | 95% CI |                                     | n         | %  | 95% CI |                                     |      |                        |      |                        |  |
| Higher education  | 1052      | 16                                   | 14 19  | ***                                 | 1167      | 19 | 16 21  | ***                                 | 725       | 19 | 17 22  | **                                  | 3    | ns                     | 1    | ns                     |  |
| Lower education   | 1887      | 23                                   | 22 25  |                                     | 1017      | 26 | 23 28  |                                     | 339       | 27 | 23 32  |                                     | 4    | ns                     | 2    | ns                     |  |
|                   |           | Raised blood pressure                |        |                                     |           |    |        |                                     |           |    |        |                                     |      | 2018–2019 vs 1998–2002 |      | 2018–2019 vs 2008–2012 |  |
| Educational level | 1998–2002 |                                      |        | Chi-squared test within period sign | 2008–2012 |    |        | Chi-squared test within period sign | 2018–2019 |    |        | Chi-squared test within period sign | Diff | chi-squared sign       | Diff | chi-squared sign       |  |
|                   | n         | %                                    | 95% CI |                                     | n         | %  | 95% CI |                                     | n         | %  | 95% CI |                                     |      |                        |      |                        |  |
| Higher education  | 1052      | 35                                   | 32 38  | **                                  | 1167      | 22 | 19 24  | ***                                 | 725       | 14 | 12 17  | **                                  | -21  | ***                    | -7   | ***                    |  |
| Lower education   | 1887      | 42                                   | 40 44  |                                     | 1017      | 29 | 26 32  |                                     | 339       | 21 | 17 25  |                                     | -21  | ***                    | -8   | **                     |  |
|                   |           | Hypertension                         |        |                                     |           |    |        |                                     |           |    |        |                                     |      | 2018–2019 vs 1998–2002 |      | 2018–2019 vs 2008–2012 |  |
| Educational level | 1998–2002 |                                      |        | Chi-squared test within period sign | 2008–2012 |    |        | Chi-squared test within period sign | 2018–2019 |    |        | Chi-squared test within period sign | Diff | chi-squared sign       | Diff | chi-squared sign       |  |
|                   | n         | %                                    | 95% CI |                                     | n         | %  | 95% CI |                                     | n         | %  | 95% CI |                                     |      |                        |      |                        |  |
| Higher education  | 1052      | 40                                   | 37 43  | **                                  | 1167      | 31 | 28 34  | ***                                 | 725       | 28 | 25 31  | **                                  | -12  | ***                    | -3   | ns                     |  |
| Lower education   | 1887      | 47                                   | 45 49  |                                     | 1017      | 40 | 37 43  |                                     | 339       | 39 | 34 44  |                                     | -8   | **                     | -1   | ns                     |  |
|                   |           | Undiagnosed hypertension             |        |                                     |           |    |        |                                     |           |    |        |                                     |      | 2018–2019 vs 1998–2002 |      | 2018–2019 vs 2008–2012 |  |
| Educational level | 1998–2002 |                                      |        | Chi-squared test within period sign | 2008–2012 |    |        | Chi-squared test within period sign | 2018–2019 |    |        | Chi-squared test within period sign | Diff | chi-squared sign       | Diff | chi-squared sign       |  |
|                   | n         | %                                    | 95% CI |                                     | n         | %  | 95% CI |                                     | n         | %  | 95% CI |                                     |      |                        |      |                        |  |
| Higher education  | 337       | 47                                   | 42 53  | ns                                  | 311       | 36 | 31 42  | **                                  | 192       | 27 | 21 34  | ns                                  | -20  | ***                    | -9   | *                      |  |
| Lower education   | 1037      | 43                                   | 40 46  |                                     | 534       | 25 | 21 28  |                                     | 172       | 29 | 23 36  |                                     | -14  | **                     | 5    | ns                     |  |
|                   |           | Diagnosed but untreated hypertension |        |                                     |           |    |        |                                     |           |    |        |                                     |      | 2018–2019 vs 1998–2002 |      | 2018–2019 vs 2008–2012 |  |
| Educational level | 1998–2002 |                                      |        | Chi-squared test within period sign | 2008–2012 |    |        | Chi-squared test within period sign | 2018–2019 |    |        | Chi-squared test within period sign | Diff | chi-squared sign       | Diff | chi-squared sign       |  |
|                   | n         | %                                    | 95% CI |                                     | n         | %  | 95% CI |                                     | n         | %  | 95% CI |                                     |      |                        |      |                        |  |
| Higher education  | 337       | 19                                   | 14 23  | ns                                  | 311       | 15 | 11 19  | ns                                  | 192       | 16 | 11 22  | ns                                  | -2   | ns                     | 1    | ns                     |  |
| Lower education   | 1037      | 15                                   | 13 18  |                                     | 534       | 17 | 13 20  |                                     | 172       | 13 | 8 18   |                                     | -3   | ***                    | -4   | *                      |  |
|                   |           | Uncontrolled hypertension            |        |                                     |           |    |        |                                     |           |    |        |                                     |      | 2018–2019 vs 1998–2002 |      | 2018–2019 vs 2008–2012 |  |
| Educational level | 1998–2002 |                                      |        | Chi-squared test within period sign | 2008–2012 |    |        | Chi-squared test within period sign | 2018–2019 |    |        | Chi-squared test within period sign | Diff | chi-squared sign       | Diff | chi-squared sign       |  |
|                   | n         | %                                    | 95% CI |                                     | n         | %  | 95% CI |                                     | n         | %  | 95% CI |                                     |      |                        |      |                        |  |
| Higher education  | 337       | 23                                   | 19 28  | **                                  | 311       | 22 | 18 27  | ns                                  | 192       | 15 | 10 20  | ns                                  | -8   | *                      | -7   | *                      |  |
| Lower education   | 1037      | 31                                   | 29 34  |                                     | 534       | 28 | 25 32  |                                     | 172       | 17 | 12 23  |                                     | -14  | ***                    | -11  | ns                     |  |
|                   |           | Controlled hypertension              |        |                                     |           |    |        |                                     |           |    |        |                                     |      | 2018–2019 vs 1998–2002 |      | 2018–2019 vs 2008–2012 |  |
| Educational level | 1998–2002 |                                      |        | Chi-squared test within period sign | 2008–2012 |    |        | Chi-squared test within period sign | 2018–2019 |    |        | Chi-squared test within period sign | Diff | chi-squared sign       | Diff | chi-squared sign       |  |
|                   | n         | %                                    | 95% CI |                                     | n         | %  | 95% CI |                                     | n         | %  | 95% CI |                                     |      |                        |      |                        |  |
| Higher education  | 337       | 11                                   | 7 14   | ns                                  | 311       | 26 | 21 31  | ns                                  | 192       | 41 | 34 48  | ns                                  | 31   | ***                    | 15   | **                     |  |
| Lower education   | 1037      | 10                                   | 8 12   |                                     | 534       | 31 | 27 34  |                                     | 172       | 40 | 33 48  |                                     | 30   | ***                    | 10   | ns                     |  |

Prevalence are age-standardized by ISTAT Italian population 2000, 2010 and 2019 respectively. CI: confidence interval. Diff: prevalence difference between 2018–2019 and 1998–2002 or 2018–2019 and 2008–2012; the values are approximated taking into account the first decimal of prevalence. Higher education - high school or college; lower education - primary or middle school. Chi-squared test to compare prevalences between periods and among age classes within the period. Raised blood pressure: systolic blood pressure  $\geq 140$  mmHg and/or diastolic blood pressure  $\geq 90$  mmHg. Hypertension: systolic blood pressure  $\geq 140$  mmHg and/or diastolic blood pressure  $\geq 90$ . Hypertension is divided into 'undiagnosed', 'diagnosed but untreated', 'uncontrolled' (treated and SBP  $\geq 140$  mmHg or DBP  $\geq 90$  mmHg) and 'controlled' (treated and SBP  $< 140$  mmHg and DBP  $< 90$  mmHg). Pool of the following Italian Regions: Piedmont, Lombardy, Liguria, Emilia Romagna, Tuscany, Lazio, Abruzzo, Basilicata, Calabria, and Sicily.

**Table S10. Age-standardized blood pressure mean values, and prevalence of raised blood pressure, hypertension and controlled hypertension based on measurements by sex and Italian Region. Italian resident men and women aged 35–74 years, the CUORE Project Survey 2018-2019.**

|                |     | 2018-2019                      |    |       |                                 |           |       |                       |        |           |              |        |           |                         |        |           |    |    |
|----------------|-----|--------------------------------|----|-------|---------------------------------|-----------|-------|-----------------------|--------|-----------|--------------|--------|-----------|-------------------------|--------|-----------|----|----|
|                |     | MEN                            |    |       |                                 |           |       |                       |        |           |              |        |           |                         |        |           |    |    |
| Italian Region | n   | Systolic blood pressure (mmHg) |    |       | Diastolic blood pressure (mmHg) |           |       | Raised blood pressure |        |           | Hypertension |        |           | Controlled hypertension |        |           |    |    |
|                |     | mean                           | SD | 95%CI | mean                            | SD        | 95%CI | %                     | 95% CI |           | %            | 95% CI |           | %                       | 95% CI |           |    |    |
| Abruzzo        | 102 | <b>134</b>                     | 14 | 132   | 137                             | <b>78</b> | 10    | 76                    | 80     | <b>36</b> | 27           | 45     | <b>47</b> | 37                      | 56     | <b>18</b> | 10 | 25 |
| Calabria       | 101 | <b>132</b>                     | 13 | 130   | 135                             | <b>76</b> | 9     | 75                    | 78     | <b>31</b> | 22           | 40     | <b>49</b> | 39                      | 59     | <b>31</b> | 22 | 40 |
| Liguria        | 104 | <b>127</b>                     | 12 | 125   | 130                             | <b>76</b> | 10    | 74                    | 78     | <b>20</b> | 12           | 27     | <b>40</b> | 30                      | 49     | <b>31</b> | 22 | 40 |
| Lazio          | 99  | <b>130</b>                     | 13 | 127   | 133                             | <b>79</b> | 10    | 77                    | 81     | <b>29</b> | 20           | 38     | <b>47</b> | 37                      | 57     | <b>31</b> | 22 | 40 |
| Lombardy       | 98  | <b>134</b>                     | 15 | 131   | 137                             | <b>78</b> | 9     | 76                    | 80     | <b>37</b> | 27           | 46     | <b>48</b> | 38                      | 58     | <b>19</b> | 11 | 26 |
| Piedmont       | 104 | <b>129</b>                     | 13 | 126   | 131                             | <b>75</b> | 9     | 73                    | 77     | <b>18</b> | 11           | 26     | <b>35</b> | 26                      | 45     | <b>43</b> | 34 | 53 |
| Emilia Romagna | 104 | <b>134</b>                     | 15 | 131   | 137                             | <b>79</b> | 10    | 77                    | 81     | <b>30</b> | 21           | 39     | <b>42</b> | 33                      | 51     | <b>20</b> | 12 | 27 |
| Basilicata     | 106 | <b>134</b>                     | 15 | 132   | 137                             | <b>80</b> | 10    | 78                    | 82     | <b>35</b> | 26           | 44     | <b>48</b> | 39                      | 58     | <b>27</b> | 19 | 36 |
| Tuscany        | 108 | <b>129</b>                     | 13 | 127   | 132                             | <b>77</b> | 9     | 75                    | 79     | <b>28</b> | 20           | 37     | <b>40</b> | 31                      | 50     | <b>25</b> | 17 | 33 |
| Sicily         | 105 | <b>132</b>                     | 13 | 129   | 134                             | <b>78</b> | 10    | 76                    | 80     | <b>33</b> | 24           | 42     | <b>44</b> | 35                      | 54     | <b>27</b> | 18 | 35 |
|                |     | WOMEN                          |    |       |                                 |           |       |                       |        |           |              |        |           |                         |        |           |    |    |
| Italian Region | n   | Systolic blood pressure (mmHg) |    |       | Diastolic blood pressure (mmHg) |           |       | Raised blood pressure |        |           | Hypertension |        |           | Controlled hypertension |        |           |    |    |
|                |     | mean                           | SD | 95%CI | mean                            | SD        | 95%CI | %                     | 95% CI |           | %            | 95% CI |           | %                       | 95% CI |           |    |    |
| Abruzzo        | 104 | <b>122</b>                     | 17 | 118   | 125                             | <b>73</b> | 10    | 71                    | 75     | <b>14</b> | 8            | 21     | <b>31</b> | 22                      | 40     | <b>45</b> | 35 | 54 |
| Calabria       | 109 | <b>121</b>                     | 14 | 119   | 124                             | <b>70</b> | 10    | 68                    | 72     | <b>16</b> | 9            | 23     | <b>40</b> | 31                      | 50     | <b>48</b> | 38 | 57 |
| Liguria        | 107 | <b>117</b>                     | 15 | 114   | 120                             | <b>72</b> | 11    | 70                    | 74     | <b>15</b> | 8            | 22     | <b>30</b> | 21                      | 38     | <b>32</b> | 23 | 40 |
| Lazio          | 114 | <b>124</b>                     | 14 | 122   | 127                             | <b>76</b> | 9     | 74                    | 78     | <b>16</b> | 9            | 22     | <b>35</b> | 26                      | 43     | <b>68</b> | 60 | 77 |
| Lombardy       | 100 | <b>127</b>                     | 18 | 124   | 131                             | <b>75</b> | 11    | 73                    | 77     | <b>24</b> | 16           | 33     | <b>37</b> | 27                      | 46     | <b>35</b> | 25 | 44 |
| Piedmont       | 113 | <b>117</b>                     | 13 | 115   | 119                             | <b>70</b> | 9     | 68                    | 71     | <b>8</b>  | 3            | 13     | <b>16</b> | 10                      | 23     | <b>43</b> | 34 | 53 |
| Emilia Romagna | 106 | <b>127</b>                     | 16 | 124   | 130                             | <b>76</b> | 11    | 74                    | 78     | <b>24</b> | 16           | 32     | <b>40</b> | 30                      | 49     | <b>32</b> | 23 | 41 |
| Basilicata     | 114 | <b>121</b>                     | 16 | 118   | 124                             | <b>72</b> | 10    | 70                    | 74     | <b>16</b> | 9            | 23     | <b>31</b> | 23                      | 39     | <b>22</b> | 15 | 30 |
| Tuscany        | 97  | <b>120</b>                     | 15 | 117   | 123                             | <b>72</b> | 9     | 70                    | 74     | <b>15</b> | 8            | 23     | <b>22</b> | 14                      | 31     | <b>22</b> | 14 | 30 |
| Sicily         | 102 | <b>124</b>                     | 14 | 121   | 127                             | <b>74</b> | 9     | 72                    | 76     | <b>17</b> | 10           | 24     | <b>37</b> | 27                      | 46     | <b>63</b> | 54 | 73 |

SD: standard deviations. Means, standard deviations and prevalences were age-standardized by Italian National Institute of Statistics-ISTAT Italian population 2019. Raised blood pressure: systolic blood pressure  $\geq 140$  mmHg and/or diastolic blood pressure  $\geq 90$  mmHg. Hypertension: systolic blood pressure  $\geq 140$  mmHg and/or diastolic blood pressure  $\geq 90$  mmHg and/or under specific pharmacological treatment. Controlled hypertension: treated and SBP  $< 140$  mmHg and DBP  $< 90$  mmHg. Regional data for 1998–2002 and 2008–2012 CUORE Project surveys were available at <http://www.cuore.iss.it/eng/survey/cuoredata>.

**Table S11. Blood pressure and heart rate measurements and prevalence of blood pressure treatment, raised blood pressure, hypertension and state of hypertension control, (age-adjusted using the European standard population) by sex and period. Italian resident men and women aged 35–74 years, the CUORE Project Surveys 1998–2002, 2008–2012 and 2018–2019.**

|                                       | MEN       |        |         |           |        |         |           |        |         |                        |                     |                        |                     |
|---------------------------------------|-----------|--------|---------|-----------|--------|---------|-----------|--------|---------|------------------------|---------------------|------------------------|---------------------|
|                                       | 1998–2002 |        |         | 2008–2012 |        |         | 2018–2019 |        |         | 2018–2019 vs 1998–2002 |                     | 2018–2019 vs 2008–2012 |                     |
|                                       | n=2985    |        |         | n=2218    |        |         | n=1031    |        |         | Diff                   | t-test p-value      | Diff                   | t-test p-value      |
| Systolic blood pressure - SBP (mmHg)  | mean      | SD     | 95% CI  | mean      | SD     | 95% CI  | mean      | SD     | 95% CI  |                        |                     |                        |                     |
|                                       | 136       | 18     | 136 137 | 132       | 16     | 132 133 | 132       | 14     | 131 132 | -5                     | ***                 | -1                     | ns                  |
| Diastolic blood pressure - DBP (mmHg) | 86        | 11     | 86 87   | 84        | 10     | 83 84   | 77        | 10     | 77 78   | -9                     | ***                 | -6                     | ***                 |
| SBP not under drug treatment (mmHg)   | 134       | 17     | 133 135 | 131       | 16     | 130 131 | 131       | 14     | 130 132 | -3                     | ***                 | 0.3                    | ns                  |
| DBP not under drug treatment (mmHg)   | 85        | 10     | 85 86   | 83        | 10     | 83 84   | 77        | 10     | 76 77   | -9                     | ***                 | -6                     | ***                 |
| Heart rate (beats per minute)         | 66        | 11     | 66 66   | 69        | 10     | 68 69   | 72        | 12     | 71 72   | 6                      | ***                 | 3                      | ***                 |
|                                       | %         | 95% CI |         | %         | 95% CI |         | %         | 95% CI |         | Diff                   | chi-squared p-value | Diff                   | chi-squared p-value |
| Blood pressure drug treatment         | 20        | 18     | 21      | 26        | 24     | 27      | 25        | 23     | 28      | 6                      | **                  | -0.4                   | ns                  |
| Raised blood pressure                 | 51        | 49     | 53      | 41        | 39     | 43      | 30        | 27     | 32      | -21                    | ***                 | -11                    | ***                 |
| Hypertension                          | 55        | 53     | 57      | 51        | 49     | 53      | 44        | 41     | 47      | -11                    | ***                 | -7                     | **                  |
| Hypertension                          |           |        |         |           |        |         |           |        |         |                        |                     |                        |                     |
| Undiagnosed                           | 53        | 50     | 55      | 39        | 36     | 41      | 37        | 32     | 41      | -16                    | ***                 | -2                     | ns                  |
| Diagnosed but untreated               | 15        | 14     | 17      | 18        | 16     | 20      | 14        | 11     | 17      | -1                     | ns                  | -3                     | ns                  |
| Uncontrolled                          | 26        | 23     | 28      | 26        | 23     | 28      | 22        | 18     | 26      | -4                     | ns                  | -4                     | ns                  |
| Controlled                            | 7         | 5      | 8       | 18        | 16     | 20      | 27        | 23     | 31      | 20                     | ***                 | 9                      | ***                 |

  

|                                       | WOMEN     |        |         |           |        |         |           |        |         |                        |                     |                        |                     |
|---------------------------------------|-----------|--------|---------|-----------|--------|---------|-----------|--------|---------|------------------------|---------------------|------------------------|---------------------|
|                                       | 1998–2002 |        |         | 2008–2012 |        |         | 2018–2019 |        |         | 2018–2019 vs 1998–2002 |                     | 2018–2019 vs 2008–2012 |                     |
|                                       | n=2951    |        |         | n=2185    |        |         | n=1066    |        |         | Diff                   | t-test p-value      | Diff                   | t-test p-value      |
| Systolic blood pressure - SBP (mmHg)  | mean      | SD     | 95% CI  | mean      | SD     | 95% CI  | mean      | SD     | 95% CI  |                        |                     |                        |                     |
|                                       | 132       | 18     | 131 132 | 127       | 17     | 126 127 | 122       | 16     | 121 123 | -10                    | ***                 | -5                     | ***                 |
| Diastolic blood pressure - DBP (mmHg) | 82        | 10     | 82 83   | 79        | 9      | 78 79   | 73        | 11     | 72 73   | -9                     | ***                 | -6                     | ***                 |
| SBP not under drug treatment (mmHg)   | 129       | 16     | 128 129 | 124       | 15     | 123 125 | 120       | 15     | 119 121 | -9                     | ***                 | -4                     | ***                 |
| DBP not under drug treatment (mmHg)   | 81        | 10     | 80 81   | 78        | 9      | 77 78   | 72        | 10     | 71 72   | -9                     | ***                 | -6                     | ***                 |
| Heart rate (beats per minute)         | 70        | 11     | 69 70   | 71        | 9      | 71 71   | 73        | 11     | 72 73   | 3                      | ***                 | 2                      | ***                 |
|                                       | %         | 95% CI |         | %         | 95% CI |         | %         | 95% CI |         | Diff                   | chi-squared p-value | Diff                   | chi-squared p-value |
| Blood pressure drug treatment         | 22        | 20     | 23      | 23        | 21     | 25      | 22        | 19     | 24      | 0.3                    | ns                  | -1                     | ns                  |
| Raised blood pressure                 | 40        | 38     | 41      | 26        | 24     | 28      | 16        | 14     | 18      | -23                    | ***                 | -10                    | ***                 |
| Hypertension                          | 45        | 43     | 46      | 36        | 34     | 38      | 31        | 28     | 34      | -14                    | ***                 | -5                     | **                  |
| Hypertension                          |           |        |         |           |        |         |           |        |         |                        |                     |                        |                     |
| Undiagnosed                           | 44        | 42     | 47      | 31        | 28     | 34      | 28        | 24     | 33      | -16                    | ***                 | -3                     | ns                  |
| Diagnosed but untreated               | 16        | 14     | 18      | 15        | 13     | 18      | 16        | 12     | 20      | 0.3                    | ns                  | 1                      | ns                  |
| Uncontrolled                          | 30        | 27     | 32      | 26        | 24     | 29      | 16        | 12     | 19      | -14                    | ***                 | -11                    | ***                 |
| Controlled                            | 10        | 9      | 12      | 27        | 24     | 30      | 40        | 35     | 45      | 30                     | ***                 | 13                     | ***                 |

Means, standard deviation and prevalence are age-standardized by European standard population 2013. SD: standard deviation. CI: confidence interval. Diff: mean or percentage difference between 2018–2019 and 1998–2002 or 2018–2019 and 2008–2012; the values are approximated taking into account the first decimal of means or prevalence. t-test to compare mean values between periods. Chi-squared test to compare prevalences between periods. Raised blood pressure: systolic blood pressure  $\geq 140$  mmHg and/or diastolic blood pressure  $\geq 90$  mmHg. Hypertension: systolic blood pressure  $\geq 140$  mmHg and/or diastolic blood pressure  $\geq 90$  mmHg and/or under specific pharmacological treatment. Hypertension is divided into 'undiagnosed', 'diagnosed but untreated', 'uncontrolled' (treated and SBP  $\geq 140$  mmHg or DBP  $\geq 90$  mmHg) and 'controlled' (treated and SBP  $< 140$  mmHg and DBP  $< 90$  mmHg). Pool of the following Italian Regions: Piedmont, Lombardy, Liguria, Emilia Romagna, Tuscany, Lazio, Abruzzo, Basilicata, Calabria, and Sicily.

**Table S12. Blood pressure measurements and heart rate mean levels by educational level and period (age-adjusted using the European standard population). Italian resident men aged 35–74 years, the CUORE Project Surveys 1998–2002, 2008–2012, and 2018–2019.**

| MEN                                                      |           |      |    |         |                              |           |      |    |         |                              |           |      |    |         |                              |                        |             |                        |             |
|----------------------------------------------------------|-----------|------|----|---------|------------------------------|-----------|------|----|---------|------------------------------|-----------|------|----|---------|------------------------------|------------------------|-------------|------------------------|-------------|
| Systolic blood pressure (mmHg)                           |           |      |    |         |                              |           |      |    |         |                              |           |      |    |         |                              |                        |             |                        |             |
| Educational level                                        | 1998-2002 |      |    |         | ANOVA within period sign *** | 2008-2012 |      |    |         | ANOVA within period sign *** | 2018-2019 |      |    |         | ANOVA within period sign *** | 2018-2019 vs 1998-2002 |             | 2018-2019 vs 2008-2012 |             |
|                                                          | n         | mean | SD | 95% CI  |                              | n         | mean | SD | 95% CI  |                              | n         | mean | SD | 95% CI  |                              | Diff                   | t-test sign | Diff                   | t-test sign |
| Higher education                                         | 1249      | 135  | 17 | 135 136 |                              | 1183      | 131  | 15 | 130 131 |                              | 725       | 131  | 14 | 130 132 |                              | -5                     | ***         | 0.1                    | ns          |
| Lower education                                          | 1730      | 137  | 18 | 136 138 |                              | 1018      | 134  | 17 | 133 135 |                              | 303       | 134  | 16 | 132 135 |                              | -3                     | **          | -0.3                   | ns          |
| Diastolic blood pressure (mmHg)                          |           |      |    |         |                              |           |      |    |         |                              |           |      |    |         |                              |                        |             |                        |             |
| Educational level                                        | 1998-2002 |      |    |         | ANOVA within period sign ns  | 2008-2012 |      |    |         | ANOVA within period sign ns  | 2018-2019 |      |    |         | ANOVA within period sign ns  | 2018-2019 vs 1998-2002 |             | 2018-2019 vs 2008-2012 |             |
|                                                          | n         | mean | SD | 95% CI  |                              | n         | mean | SD | 95% CI  |                              | n         | mean | SD | 95% CI  |                              | Diff                   | t-test sign | Diff                   | t-test sign |
| Higher education                                         | 1249      | 87   | 11 | 86 87   |                              | 1183      | 83   | 10 | 83 84   |                              | 725       | 77   | 10 | 77 78   |                              | -9                     | ***         | -6                     | ***         |
| Lower education                                          | 1730      | 86   | 11 | 86 87   |                              | 1018      | 84   | 10 | 83 84   |                              | 303       | 78   | 10 | 77 79   |                              | -8                     | ***         | -6                     | ***         |
| Systolic blood pressure not under drug treatment (mmHg)  |           |      |    |         |                              |           |      |    |         |                              |           |      |    |         |                              |                        |             |                        |             |
| Educational level                                        | 1998-2002 |      |    |         | ANOVA within period sign *** | 2008-2012 |      |    |         | ANOVA within period sign *** | 2018-2019 |      |    |         | ANOVA within period sign *** | 2018-2019 vs 1998-2002 |             | 2018-2019 vs 2008-2012 |             |
|                                                          | n         | mean | SD | 95% CI  |                              | n         | mean | SD | 95% CI  |                              | n         | mean | SD | 95% CI  |                              | Diff                   | t-test sign | Diff                   | t-test sign |
| Higher education                                         | 1046      | 134  | 16 | 133 135 |                              | 913       | 129  | 15 | 128 130 |                              | 537       | 130  | 13 | 129 131 |                              | -4                     | ***         | 1                      | ns          |
| Lower education                                          | 1305      | 134  | 17 | 133 135 |                              | 680       | 132  | 16 | 131 133 |                              | 205       | 133  | 15 | 131 135 |                              | -1                     | ns          | 1                      | ns          |
| Diastolic blood pressure not under drug treatment (mmHg) |           |      |    |         |                              |           |      |    |         |                              |           |      |    |         |                              |                        |             |                        |             |
| Educational level                                        | 1998-2002 |      |    |         | ANOVA within period sign ns  | 2008-2012 |      |    |         | ANOVA within period sign ns  | 2018-2019 |      |    |         | ANOVA within period sign ns  | 2018-2019 vs 1998-2002 |             | 2018-2019 vs 2008-2012 |             |
|                                                          | n         | mean | SD | 95% CI  |                              | n         | mean | SD | 95% CI  |                              | n         | mean | SD | 95% CI  |                              | Diff                   | t-test sign | Diff                   | t-test sign |
| Higher education                                         | 1046      | 86   | 10 | 85 86   |                              | 913       | 83   | 10 | 82 83   |                              | 537       | 77   | 10 | 76 78   |                              | -9                     | ***         | -6                     | ***         |
| Lower education                                          | 1305      | 85   | 10 | 85 86   |                              | 680       | 83   | 10 | 83 84   |                              | 205       | 77   | 9  | 76 78   |                              | -8                     | ***         | -6                     | ***         |
| Heart rate (beats per minute)                            |           |      |    |         |                              |           |      |    |         |                              |           |      |    |         |                              |                        |             |                        |             |
| Educational level                                        | 1998-2002 |      |    |         | ANOVA within period sign ns  | 2008-2012 |      |    |         | ANOVA within period sign ns  | 2018-2019 |      |    |         | ANOVA within period sign **  | 2018-2019 vs 1998-2002 |             | 2018-2019 vs 2008-2012 |             |
|                                                          | n         | mean | SD | 95% CI  |                              | n         | mean | SD | 95% CI  |                              | n         | mean | SD | 95% CI  |                              | Diff                   | t-test sign | Diff                   | t-test sign |
| Higher education                                         | 1244      | 66   | 11 | 65 67   |                              | 1183      | 66   | 11 | 65 67   |                              | 725       | 71   | 11 | 70 71   |                              | 5                      | ***         | 5                      | ***         |
| Lower education                                          | 1730      | 66   | 11 | 65 67   |                              | 1018      | 66   | 12 | 66 67   |                              | 303       | 74   | 12 | 73 76   |                              | 8                      | ***         | 8                      | ***         |

Means and standard deviations age-standardized by European standard population 2013. SD: standard deviation; CI: confidence interval. Diff: mean difference between 2018–2019 and 1998–2002 or 2018–2019 and 2008–2012; the values are approximated taking into account the first decimal of means. Higher education - high school or college; lower education - primary or middle school. ANOVA: Analysis of Variance to compare variables among age classes within periods. t-test to compare variables between periods. \*\*\* p-value<0.0001; \*\* p-value<0.01; \*p-value<0.05; ns not significant p-value. Pool of the following Italian Regions: Piedmont, Lombardy, Liguria, Emilia Romagna, Tuscany, Lazio, Abruzzo, Basilicata, Calabria, and Sicily.

**Table S13. Blood pressure measurements and heart rate mean levels by educational level and period (age-adjusted using the European standard population). Italian resident women aged 35–74 years, the CUORE Project Surveys 1998–2002, 2008–2012, and 2018–2019.**

| WOMEN                                                    |           |      |    |         |                          |           |      |    |         |                          |           |      |    |         |                        |             |                        |             |
|----------------------------------------------------------|-----------|------|----|---------|--------------------------|-----------|------|----|---------|--------------------------|-----------|------|----|---------|------------------------|-------------|------------------------|-------------|
| Systolic blood pressure (mmHg)                           |           |      |    |         |                          |           |      |    |         |                          |           |      |    |         |                        |             |                        |             |
| Educational level                                        | 1998-2002 |      |    |         | ANOVA within period sign | 2008-2012 |      |    |         | ANOVA within period sign | 2018-2019 |      |    |         | 2018-2019 vs 1998-2002 |             | 2018-2019 vs 2008-2012 |             |
|                                                          | n         | mean | SD | 95% CI  |                          | n         | mean | SD | 95% CI  |                          | n         | mean | SD | 95% CI  | Diff                   | t-test sign | Diff                   | t-test sign |
| Higher education                                         | 1052      | 130  | 16 | 129 131 | ***                      | 1167      | 124  | 15 | 123 125 | ***                      | 725       | 120  | 15 | 119 121 | -10                    | ***         | -4                     | ***         |
| Lower education                                          | 1887      | 133  | 18 | 132 134 |                          | 1017      | 130  | 18 | 129 131 |                          | 339       | 125  | 17 | 123 127 | -8                     | ***         | -4                     | ***         |
| Diastolic blood pressure (mmHg)                          |           |      |    |         |                          |           |      |    |         |                          |           |      |    |         |                        |             |                        |             |
| Educational level                                        | 1998-2002 |      |    |         | ANOVA within period sign | 2008-2012 |      |    |         | ANOVA within period sign | 2018-2019 |      |    |         | 2018-2019 vs 1998-2002 |             | 2018-2019 vs 2008-2012 |             |
|                                                          | n         | mean | SD | 95% CI  |                          | n         | mean | SD | 95% CI  |                          | n         | mean | SD | 95% CI  | Diff                   | t-test sign | Diff                   | t-test sign |
| Higher education                                         | 1052      | 81   | 10 | 81 82   | ***                      | 1167      | 78   | 9  | 77 78   | ***                      | 725       | 72   | 11 | 72 73   | -9                     | ***         | -6                     | ***         |
| Lower education                                          | 1887      | 83   | 10 | 82 83   |                          | 1017      | 79   | 10 | 79 80   |                          | 339       | 74   | 10 | 73 75   | -9                     | ***         | -5                     | ***         |
| Systolic blood pressure not under drug treatment (mmHg)  |           |      |    |         |                          |           |      |    |         |                          |           |      |    |         |                        |             |                        |             |
| Educational level                                        | 1998-2002 |      |    |         | ANOVA within period sign | 2008-2012 |      |    |         | ANOVA within period sign | 2018-2019 |      |    |         | 2018-2019 vs 1998-2002 |             | 2018-2019 vs 2008-2012 |             |
|                                                          | n         | mean | SD | 95% CI  |                          | n         | mean | SD | 95% CI  |                          | n         | mean | SD | 95% CI  | Diff                   | t-test sign | Diff                   | t-test sign |
| Higher education                                         | 928       | 128  | 16 | 127 129 | ***                      | 992       | 122  | 14 | 121 122 | ***                      | 593       | 119  | 15 | 117 120 | -9                     | ***         | -3                     | ***         |
| Lower education                                          | 1331      | 129  | 16 | 129 130 |                          | 651       | 127  | 16 | 126 128 |                          | 203       | 123  | 16 | 121 125 | -6                     | ***         | -4                     | **          |
| Diastolic blood pressure not under drug treatment (mmHg) |           |      |    |         |                          |           |      |    |         |                          |           |      |    |         |                        |             |                        |             |
| Educational level                                        | 1998-2002 |      |    |         | ANOVA within period sign | 2008-2012 |      |    |         | ANOVA within period sign | 2018-2019 |      |    |         | 2018-2019 vs 1998-2002 |             | 2018-2019 vs 2008-2012 |             |
|                                                          | n         | mean | SD | 95% CI  |                          | n         | mean | SD | 95% CI  |                          | n         | mean | SD | 95% CI  | Diff                   | t-test sign | Diff                   | t-test sign |
| Higher education                                         | 928       | 81   | 10 | 80 81   | ***                      | 992       | 77   | 9  | 77 78   | ***                      | 593       | 71   | 10 | 70 72   | -9                     | ***         | -6                     | ***         |
| Lower education                                          | 1331      | 81   | 10 | 81 82   |                          | 651       | 78   | 9  | 78 79   |                          | 203       | 73   | 10 | 72 75   | -8                     | ***         | -5                     | ***         |
| Heart rate (beats per minute)                            |           |      |    |         |                          |           |      |    |         |                          |           |      |    |         |                        |             |                        |             |
| Educational level                                        | 1998-2002 |      |    |         | ANOVA within period sign | 2008-2012 |      |    |         | ANOVA within period sign | 2018-2019 |      |    |         | 2018-2019 vs 1998-2002 |             | 2018-2019 vs 2008-2012 |             |
|                                                          | n         | mean | SD | 95% CI  |                          | n         | mean | SD | 95% CI  |                          | n         | mean | SD | 95% CI  | Diff                   | t-test sign | Diff                   | t-test sign |
| Higher education                                         | 1047      | 69   | 11 | 69 70   | ns                       | 1167      | 71   | 9  | 70 71   | ns                       | 725       | 73   | 10 | 72 73   | 3                      | ***         | 2                      | **          |
| Lower education                                          | 1884      | 70   | 11 | 69 70   |                          | 1017      | 71   | 9  | 71 72   |                          | 339       | 73   | 11 | 72 75   | 4                      | ***         | 2                      | **          |

Means and standard deviations age-standardized by European standard population 2013. SD: standard deviation; CI: confidence interval. Diff: mean difference between 2018–2019 and 1998–2002 or 2018–2019 and 2008–2012; the values are approximated taking into account the first decimal of means. Higher education - high school or college; lower education - primary or middle school. ANOVA: Analysis of Variance to compare variables among age classes within periods. t-test to compare variables between periods. \*\*\* p-value<0.0001; \*\* p-value<0.01; \*p-value<0.05; ns not significant p-value. Pool of the following Italian Regions: Piedmont, Lombardy, Liguria, Emilia Romagna, Tuscany, Lazio, Abruzzo, Basilicata, Calabria, and Sicily.



**Table S14. Prevalence of blood pressure treatment, raised blood pressure, hypertension and state of hypertension control based on measurements, by educational class and period (age-adjusted using the European standard population). Italian resident men aged 35–74 years, the CUORE Project Surveys 1998–2002, 2008–2012 and 2018–2019.**

| MEN                                  |           |    |        |                                              |           |    |        |                                              |           |    |        |                                              |                        |                  |                        |                  |
|--------------------------------------|-----------|----|--------|----------------------------------------------|-----------|----|--------|----------------------------------------------|-----------|----|--------|----------------------------------------------|------------------------|------------------|------------------------|------------------|
| Blood pressure drug treatment        |           |    |        |                                              |           |    |        |                                              |           |    |        |                                              |                        |                  |                        |                  |
| Educational level                    | 1998–2002 |    |        | Chi-squared test within period<br>sign<br>ns | 2008–2012 |    |        | Chi-squared test within period<br>sign<br>ns | 2018–2019 |    |        | Chi-squared test within period<br>sign<br>ns | 2018–2019 vs 1998–2002 |                  | 2018–2019 vs 2008–2012 |                  |
|                                      | n         | %  | 95% CI |                                              | n         | %  | 95% CI |                                              | n         | %  | 95% CI |                                              | Diff                   | chi-squared sign | Diff                   | chi-squared sign |
| Higher education                     | 1249      | 19 | 16 21  |                                              | 1183      | 26 | 23 28  |                                              | 725       | 26 | 23 29  |                                              | 7                      | **               | 0.2                    | ns               |
| Lower education                      | 1730      | 20 | 18 22  |                                              | 1018      | 26 | 24 29  |                                              | 303       | 24 | 19 29  |                                              | 4                      | ns               | -2                     | ns               |
| Raised blood pressure                |           |    |        |                                              |           |    |        |                                              |           |    |        |                                              |                        |                  |                        |                  |
| Educational level                    | 1998–2002 |    |        | Chi-squared test within period<br>sign<br>ns | 2008–2012 |    |        | Chi-squared test within period<br>sign<br>** | 2018–2019 |    |        | Chi-squared test within period<br>sign<br>ns | 2018–2019 vs 1998–2002 |                  | 2018–2019 vs 2008–2012 |                  |
|                                      | n         | %  | 95% CI |                                              | n         | %  | 95% CI |                                              | n         | %  | 95% CI |                                              | Diff                   | chi-squared sign | Diff                   | chi-squared sign |
| Higher education                     | 1249      | 49 | 46 52  |                                              | 1183      | 36 | 33 39  |                                              | 725       | 28 | 25 31  |                                              | -21                    | ***              | -8                     | **               |
| Lower education                      | 1730      | 52 | 50 55  |                                              | 1018      | 44 | 41 47  |                                              | 303       | 34 | 29 39  |                                              | -18                    | ***              | -10                    | **               |
| Hypertension                         |           |    |        |                                              |           |    |        |                                              |           |    |        |                                              |                        |                  |                        |                  |
| Educational level                    | 1998–2002 |    |        | Chi-squared test within period<br>sign<br>*  | 2008–2012 |    |        | Chi-squared test within period<br>sign<br>ns | 2018–2019 |    |        | Chi-squared test within period<br>sign<br>ns | 2018–2019 vs 1998–2002 |                  | 2018–2019 vs 2008–2012 |                  |
|                                      | n         | %  | 95% CI |                                              | n         | %  | 95% CI |                                              | n         | %  | 95% CI |                                              | Diff                   | chi-squared sign | Diff                   | chi-squared sign |
| Higher education                     | 1249      | 53 | 50 55  |                                              | 1183      | 49 | 46 52  |                                              | 725       | 43 | 40 47  |                                              | -9                     | ***              | -6                     | *                |
| Lower education                      | 1730      | 56 | 54 59  |                                              | 1018      | 53 | 50 56  |                                              | 303       | 46 | 40 52  |                                              | -10                    | **               | -7                     | *                |
| Undiagnosed hypertension             |           |    |        |                                              |           |    |        |                                              |           |    |        |                                              |                        |                  |                        |                  |
| Educational level                    | 1998–2002 |    |        | Chi-squared test within period<br>sign<br>ns | 2008–2012 |    |        | Chi-squared test within period<br>sign<br>ns | 2018–2019 |    |        | Chi-squared test within period<br>sign<br>ns | 2018–2019 vs 1998–2002 |                  | 2018–2019 vs 2008–2012 |                  |
|                                      | n         | %  | 95% CI |                                              | n         | %  | 95% CI |                                              | n         | %  | 95% CI |                                              | Diff                   | chi-squared sign | Diff                   | chi-squared sign |
| Higher education                     | 621       | 53 | 49 57  |                                              | 555       | 36 | 32 40  |                                              | 314       | 36 | 31 41  |                                              | -17                    | ***              | -0.2                   | ns               |
| Lower education                      | 1063      | 53 | 50 56  |                                              | 610       | 39 | 35 43  |                                              | 168       | 38 | 31 46  |                                              | -15                    | **               | -1                     | ns               |
| Diagnosed but untreated hypertension |           |    |        |                                              |           |    |        |                                              |           |    |        |                                              |                        |                  |                        |                  |
| Educational level                    | 1998–2002 |    |        | Chi-squared test within period<br>sign<br>ns | 2008–2012 |    |        | Chi-squared test within period<br>sign<br>ns | 2018–2019 |    |        | Chi-squared test within period<br>sign<br>ns | 2018–2019 vs 1998–2002 |                  | 2018–2019 vs 2008–2012 |                  |
|                                      | n         | %  | 95% CI |                                              | n         | %  | 95% CI |                                              | n         | %  | 95% CI |                                              | Diff                   | chi-squared sign | Diff                   | chi-squared sign |
| Higher education                     | 621       | 16 | 13 19  |                                              | 555       | 19 | 16 22  |                                              | 314       | 13 | 10 17  |                                              | -2                     | ns               | -6                     | *                |
| Lower education                      | 1063      | 15 | 12 17  |                                              | 610       | 16 | 13 18  |                                              | 168       | 15 | 10 21  |                                              | 1                      | ***              | -0.1                   | ns               |
| Uncontrolled hypertension            |           |    |        |                                              |           |    |        |                                              |           |    |        |                                              |                        |                  |                        |                  |
| Educational level                    | 1998–2002 |    |        | Chi-squared test within period<br>sign<br>ns | 2008–2012 |    |        | Chi-squared test within period<br>sign<br>** | 2018–2019 |    |        | Chi-squared test within period<br>sign<br>ns | 2018–2019 vs 1998–2002 |                  | 2018–2019 vs 2008–2012 |                  |
|                                      | n         | %  | 95% CI |                                              | n         | %  | 95% CI |                                              | n         | %  | 95% CI |                                              | Diff                   | chi-squared sign | Diff                   | chi-squared sign |
| Higher education                     | 621       | 25 | 22 29  |                                              | 555       | 22 | 19 26  |                                              | 314       | 21 | 17 26  |                                              | -4                     | ns               | -1                     | ns               |
| Lower education                      | 1063      | 26 | 23 28  |                                              | 610       | 30 | 26 33  |                                              | 168       | 26 | 19 33  |                                              | 0.5                    | ***              | -4                     | ns               |
| Controlled hypertension              |           |    |        |                                              |           |    |        |                                              |           |    |        |                                              |                        |                  |                        |                  |
| Educational level                    | 1998–2002 |    |        | Chi-squared test within period<br>sign<br>ns | 2008–2012 |    |        | Chi-squared test within period<br>sign<br>** | 2018–2019 |    |        | Chi-squared test within period<br>sign<br>*  | 2018–2019 vs 1998–2002 |                  | 2018–2019 vs 2008–2012 |                  |
|                                      | n         | %  | 95% CI |                                              | n         | %  | 95% CI |                                              | n         | %  | 95% CI |                                              | Diff                   | chi-squared sign | Diff                   | chi-squared sign |
| Higher education                     | 621       | 6  | 4 8    |                                              | 555       | 22 | 19 26  |                                              | 314       | 30 | 24 35  |                                              | 23                     | ***              | 7                      | *                |
| Lower education                      | 1063      | 7  | 5 8    |                                              | 610       | 15 | 12 18  |                                              | 168       | 20 | 14 26  |                                              | 13                     | **               | 5                      | ns               |

Prevalence are age-standardized by age-standardized by European standard population 2013. CI: confidence interval. Diff: prevalence difference between 2018–2019 and 1998–2002 or 2018–2019 and 2008–2012; the values are approximated taking into account the first decimal of prevalence. Higher education - high school or college; lower education - primary or middle school. Chi-squared test to compare prevalences between periods and among age classes within the period. Raised blood pressure: systolic blood pressure  $\geq 140$  mmHg and/or diastolic blood pressure  $\geq 90$  mmHg. Hypertension: systolic blood pressure  $\geq 140$  mmHg and/or diastolic blood pressure  $\geq 90$  and/or under specific pharmacological treatment. Hypertension is divided into 'undiagnosed', 'diagnosed but untreated', 'uncontrolled' (treated and SBP  $\geq 140$  mmHg or DBP  $\geq 90$  mmHg) and 'controlled' (treated and SBP  $< 140$  mmHg and DBP  $< 90$  mmHg). Pool of the following Italian Regions: Piedmont, Lombardy, Liguria, Emilia Romagna, Tuscany, Lazio, Abruzzo, Basilicata, Calabria, and Sicily.

**Table S15. Prevalence of blood pressure treatment, raised blood pressure, hypertension and state of hypertension control based on measurements, by educational class and period (age-adjusted using the European standard population). Italian resident women aged 35–74 years, the CUORE Project Surveys 1998–2002, 2008–2012 and 2018–2019.**

| WOMEN                                |           |    |        |                                         |           |    |        |                                         |           |    |        |                        |                  |                        |                  |
|--------------------------------------|-----------|----|--------|-----------------------------------------|-----------|----|--------|-----------------------------------------|-----------|----|--------|------------------------|------------------|------------------------|------------------|
| Blood pressure drug treatment        |           |    |        |                                         |           |    |        |                                         |           |    |        |                        |                  |                        |                  |
| Educational level                    | 1998-2002 |    |        | Chi-squared test within period sign *** | 2008-2012 |    |        | Chi-squared test within period sign *** | 2018-2019 |    |        | 2018-2019 vs 1998-2002 |                  | 2018-2019 vs 2008-2012 |                  |
|                                      | n         | %  | 95% CI |                                         | n         | %  | 95% CI |                                         | n         | %  | 95% CI | Diff                   | chi-squared sign | Diff                   | chi-squared sign |
| Higher education                     | 1052      | 16 | 14 19  |                                         | 1167      | 19 | 17 21  |                                         | 725       | 19 | 16 22  | 2                      | ns               | -0.4                   | ns               |
| Lower education                      | 1887      | 24 | 22 25  |                                         | 1017      | 26 | 24 29  |                                         | 339       | 27 | 22 31  | 3                      | ns               | 0.4                    | ns               |
| Raised blood pressure                |           |    |        |                                         |           |    |        |                                         |           |    |        |                        |                  |                        |                  |
| Educational level                    | 1998-2002 |    |        | Chi-squared test within period sign **  | 2008-2012 |    |        | Chi-squared test within period sign *** | 2018-2019 |    |        | 2018-2019 vs 1998-2002 |                  | 2018-2019 vs 2008-2012 |                  |
|                                      | n         | %  | 95% CI |                                         | n         | %  | 95% CI |                                         | n         | %  | 95% CI | Diff                   | chi-squared sign | Diff                   | chi-squared sign |
| Higher education                     | 1052      | 35 | 32 38  |                                         | 1167      | 22 | 20 24  |                                         | 725       | 14 | 11 16  | -21                    | ***              | -8                     | ***              |
| Lower education                      | 1887      | 42 | 40 44  |                                         | 1017      | 30 | 27 32  |                                         | 339       | 21 | 16 25  | -21                    | ***              | -9                     | **               |
| Hypertension                         |           |    |        |                                         |           |    |        |                                         |           |    |        |                        |                  |                        |                  |
| Educational level                    | 1998-2002 |    |        | Chi-squared test within period sign **  | 2008-2012 |    |        | Chi-squared test within period sign *** | 2018-2019 |    |        | 2018-2019 vs 1998-2002 |                  | 2018-2019 vs 2008-2012 |                  |
|                                      | n         | %  | 95% CI |                                         | n         | %  | 95% CI |                                         | n         | %  | 95% CI | Diff                   | chi-squared sign | Diff                   | chi-squared sign |
| Higher education                     | 1052      | 40 | 37 43  |                                         | 1167      | 32 | 29 34  |                                         | 725       | 27 | 24 30  | -13                    | ***              | -5                     | *                |
| Lower education                      | 1887      | 47 | 45 49  |                                         | 1017      | 41 | 38 44  |                                         | 339       | 38 | 33 43  | -9                     | **               | -3                     | ns               |
| Undiagnosed hypertension             |           |    |        |                                         |           |    |        |                                         |           |    |        |                        |                  |                        |                  |
| Educational level                    | 1998-2002 |    |        | Chi-squared test within period sign ns  | 2008-2012 |    |        | Chi-squared test within period sign **  | 2018-2019 |    |        | 2018-2019 vs 1998-2002 |                  | 2018-2019 vs 2008-2012 |                  |
|                                      | n         | %  | 95% CI |                                         | n         | %  | 95% CI |                                         | n         | %  | 95% CI | Diff                   | chi-squared sign | Diff                   | chi-squared sign |
| Higher education                     | 337       | 47 | 42 52  |                                         | 311       | 36 | 30 41  |                                         | 192       | 28 | 21 34  | -19                    | ***              | -8                     | ns               |
| Lower education                      | 1037      | 43 | 40 46  |                                         | 534       | 25 | 21 28  |                                         | 172       | 31 | 24 38  | -12                    | **               | 6                      | ns               |
| Diagnosed but untreated hypertension |           |    |        |                                         |           |    |        |                                         |           |    |        |                        |                  |                        |                  |
| Educational level                    | 1998-2002 |    |        | Chi-squared test within period sign ns  | 2008-2012 |    |        | Chi-squared test within period sign ns  | 2018-2019 |    |        | 2018-2019 vs 1998-2002 |                  | 2018-2019 vs 2008-2012 |                  |
|                                      | n         | %  | 95% CI |                                         | n         | %  | 95% CI |                                         | n         | %  | 95% CI | Diff                   | chi-squared sign | Diff                   | chi-squared sign |
| Higher education                     | 337       | 19 | 14 23  |                                         | 311       | 15 | 11 19  |                                         | 192       | 17 | 12 23  | -1                     | ns               | 2                      | ns               |
| Lower education                      | 1037      | 15 | 13 18  |                                         | 534       | 16 | 13 19  |                                         | 172       | 13 | 8 18   | -2                     | ***              | -3                     | *                |
| Uncontrolled hypertension            |           |    |        |                                         |           |    |        |                                         |           |    |        |                        |                  |                        |                  |
| Educational level                    | 1998-2002 |    |        | Chi-squared test within period sign **  | 2008-2012 |    |        | Chi-squared test within period sign *   | 2018-2019 |    |        | 2018-2019 vs 1998-2002 |                  | 2018-2019 vs 2008-2012 |                  |
|                                      | n         | %  | 95% CI |                                         | n         | %  | 95% CI |                                         | n         | %  | 95% CI | Diff                   | chi-squared sign | Diff                   | chi-squared sign |
| Higher education                     | 337       | 24 | 19 28  |                                         | 311       | 23 | 18 27  |                                         | 192       | 14 | 9 19   | -9                     | *                | -8                     | *                |
| Lower education                      | 1037      | 32 | 29 34  |                                         | 534       | 29 | 25 33  |                                         | 172       | 17 | 11 22  | -15                    | ***              | -12                    | ns               |
| Controlled hypertension              |           |    |        |                                         |           |    |        |                                         |           |    |        |                        |                  |                        |                  |
| Educational level                    | 1998-2002 |    |        | Chi-squared test within period sign ns  | 2008-2012 |    |        | Chi-squared test within period sign ns  | 2018-2019 |    |        | 2018-2019 vs 1998-2002 |                  | 2018-2019 vs 2008-2012 |                  |
|                                      | n         | %  | 95% CI |                                         | n         | %  | 95% CI |                                         | n         | %  | 95% CI | Diff                   | chi-squared sign | Diff                   | chi-squared sign |
| Higher education                     | 337       | 11 | 7 14   |                                         | 311       | 27 | 22 31  |                                         | 192       | 40 | 33 47  | 30                     | ***              | 14                     | **               |
| Lower education                      | 1037      | 10 | 8 12   |                                         | 534       | 30 | 26 34  |                                         | 172       | 40 | 32 47  | 29                     | ***              | 9                      | ns               |

Prevalence are age-standardized by age-standardized by European standard population 2013. CI: confidence interval. Diff: prevalence difference between 2018–2019 and 1998–2002 or 2018–2019 and 2008–2012; the values are approximated taking into account the first decimal of prevalence. Higher education - high school or college; lower education - primary or middle school. Chi-squared test to compare prevalences between periods and among age classes within the period. Raised blood pressure: systolic blood pressure  $\geq 140$  mmHg and/or diastolic blood pressure  $\geq 90$  mmHg. Hypertension: systolic blood pressure  $\geq 140$  mmHg and/or diastolic blood pressure  $\geq 90$  and/or under specific pharmacological treatment. Hypertension is divided into 'undiagnosed', 'diagnosed but untreated', 'uncontrolled' (treated and SBP  $\geq 140$  mmHg or DBP  $\geq 90$  mmHg) and 'controlled' (treated and SBP  $< 140$  mmHg and DBP  $< 90$  mmHg). Pool of the following Italian Regions: Piedmont, Lombardy, Liguria, Emilia Romagna, Tuscany, Lazio, Abruzzo, Basilicata, Calabria, and Sicily.
